# Supplementary material for: A substrate-controlled Ru(ii)-catalyzed C–H activation/[5 + 2] annulation cascade and unusual acyl migration to synthesize diverse indoline scaffolds
Source: Royal Society of Chemistry journal article supplement (doi:10.1039/d2qo01529c), 2022-11-08
Supplement: d2qo01529c1.pdf [file d2qo01529c1.pdf]

*Electronic supplementary information*

**A Substrate-controlled Ru(II)-catalyzed C-H Activation/[5+2]  
Annulation Cascade and Unusual Acyl Migration to Diversified  
Indoline Scaffolds**

Miao Zheng,<sup>a,b</sup> Jianhui Zhou,<sup>b</sup> Feifei Fang,<sup>b</sup> Zichao Xu,<sup>b</sup> Fuqiang Zheng,<sup>b</sup> Zhidong Jiang,<sup>b</sup> Tao Liu,<sup>a,b</sup> Hong Liu,<sup>\*b,c</sup> Linxiang Zhao,<sup>\*a</sup> Yu Zhou,<sup>\*b,c</sup>

<sup>a</sup>Key Laboratory of Structure-Based Drugs Design & Discovery of Ministry of Education, Shenyang Pharmaceutical University, Shenyang 110016, China

<sup>b</sup>Shanghai Institute of Materia Medica, Chinese Academy of Sciences, Shanghai 201203, and University of Chinese Academy of Sciences, Beijing 100049, China

<sup>c</sup>School of Pharmaceutical Science and Technology, Hangzhou Institute for Advanced Study, University of Chinese Academy of Sciences, Hangzhou 310024, China

\*E-mail: hliu@simm.ac.cn (Hong Liu); linxiang.zhao@vip.sina.com (Linxiang Zhao); zhouyu@simm.ac.cn (Yu Zhou)

## Contents

|                                                                    |    |
|--------------------------------------------------------------------|----|
| I. General Information .....                                       | 3  |
| II. Synthesis of Substrates.....                                   | 3  |
| III. Optimization of Reaction Conditions .....                     | 4  |
| IV. General procedures for the reaction.....                       | 6  |
| V. Characterization Data for Substrates.....                       | 6  |
| VI. Characterization Data for Products.....                        | 13 |
| VII. Gram-scale Preparation and Conversion of the Product .....    | 33 |
| VIII. Mechanistic Studies .....                                    | 35 |
| IX. X-ray Crystallographic Data.....                               | 39 |
| X. References .....                                                | 40 |
| XI. NMR Spectra and HR-MS Spectra of Substrates and Products ..... | 41 |

## I. General Information

Unless otherwise specified, commercially available reagents were purchased from commercial sources and used without further purification. Analytical thin layer chromatography (TLC) was performed on HSGF 254 (0.15-0.2 mm thickness), visualized by irradiation with UV light (254 nm). Column chromatography was performed on silica gel FCP 200-400 or 300-400 using ethyl acetate (EA)/petroleum ether (PE). All products were characterized by their NMR and HRMS spectra.  $^1\text{H}$  and  $^{13}\text{C}$  NMR spectra were recorded on a 500, or 600 MHz instrument. The chemical shifts were reported in parts per million (ppm,  $\delta$ ) downfield from tetramethylsilane (TMS). Proton coupling patterns were described as singlet (s), doublet (d), triplet (t), quartet (q), multiplet (m), doublet of doublets (dd), and broad (br). High-resolution mass spectra (HRMS) were measured on a Micromass Ultra Q-TOF spectrometer.

## II. Synthesis of Substrates

(a) The known substrates **1w**<sup>1</sup> was not characterized. The substrates **1a-1t** and **1w** were synthesized according to the reported procedure<sup>2</sup>.

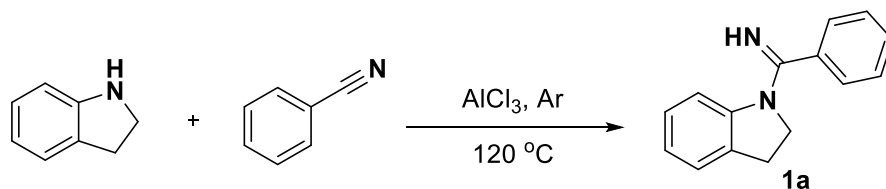

Anhydrous  $\text{AlCl}_3$  (3.88 g, 29.09 mmol) was added slowly to a mixture of indoline (4.16 g, 34.91 mmol) and benzonitrile (3 g, 29.09 mmol) at room temperature in a 25 mL round-bottomed flask, under an argon atmosphere. The resulting mixture was heated to  $120\text{ }^\circ\text{C}$  (oil bath temperature) for 12 h. The mixture was treated with NaOH aqueous solution, filtered with diatomite, and extracted with ethyl acetate for 3 times. The combined organic layer was dried over anhydrous  $\text{Na}_2\text{SO}_4$  and evaporated under reduced pressure to remove the solvent. The residue was purified by flash column chromatography on silica gel (PE/EA = 4:1) to afford the desired product.

The substrates **1u** and **1v** were synthesized according to the following procedure.

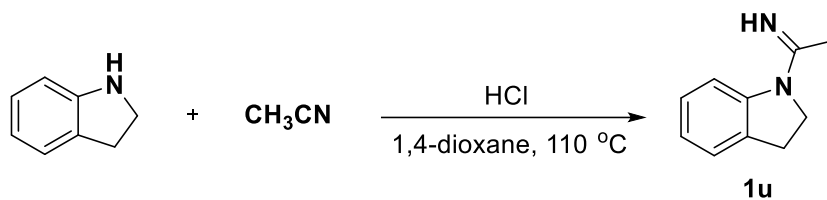

A pressure tube was charged with indoline (1.0 g, 8.39 mmol) and acetonitrile (689 mg, 16.78 mmol) and hydrochloric acid 1,4-dioxane (20 mL). The reaction mixture was stirred at 110 °C for 12 h. After that, the solvent was removed under reduced pressure and the residue was purified by reslurry using EA to afford the desired product.

(b) General procedure for the preparation of diazo compounds.

The known substrates **2a-2d**<sup>3</sup>, **2e**<sup>4</sup> and **2f**<sup>3</sup> were not characterized. The substrate **4a** was purchased from commercial sources, and used without further purification. The known substrates **4b**<sup>5</sup>, **4c**<sup>3</sup>, **4d**<sup>6</sup>, **4e**<sup>7</sup>, and **4f**<sup>4</sup> were not characterized.

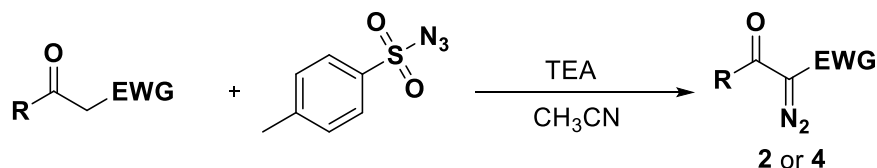

To a solution of  $\beta$ -ketoester (5 mmol, 1.0 equiv.) and 4-methylbenzenesulfonyl azide (6 mmol, 1.2 equiv.) in 20 mL CH<sub>3</sub>CN at 0 °C was added triethylamine (6 mmol, 1.2 equiv.). The resulting solution was stirred at 0 °C for 3 h and slowly brought to r.t. Upon completion as indicated by thin layer chromatography (TLC), the reaction was quenched with water, extracted with ethyl acetate, and dried over anhydrous Na<sub>2</sub>SO<sub>4</sub>. The reaction mixture was concentrated under reduced pressure, and the crude product was purified by column chromatography.

### III. Optimization of Reaction Conditions<sup>a</sup>

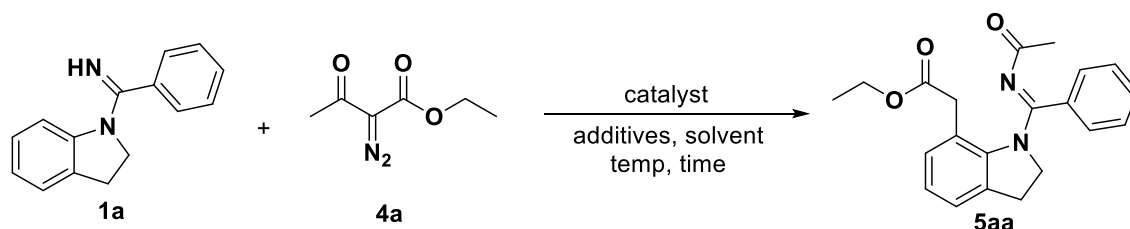

| entry | Ag salt | additive | solvent | yield (%) <sup>b</sup> |
|-------|---------|----------|---------|------------------------|
| 1     | -       | HOAc     | DCE     | 32                     |
| 2     | -       | CsOAc    | DCE     | 38                     |

|                       |                                   |                                        |                    |           |
|-----------------------|-----------------------------------|----------------------------------------|--------------------|-----------|
| 3                     | AgOTf                             | CsOAc                                  | DCE                | 40        |
| 4                     | AgNTf <sub>2</sub>                | CsOAc                                  | DCE                | 38        |
| 5                     | AgCO <sub>2</sub> CF <sub>3</sub> | CsOAc                                  | DCE                | 42        |
| 6                     | AgSbF <sub>6</sub>                | Zn(OAc) <sub>2</sub>                   | DCE                | trace     |
| 7                     | AgSbF <sub>6</sub>                | Cu(OAc) <sub>2</sub> ·H <sub>2</sub> O | DCE                | trace     |
| 8 <sup>c</sup>        | AgSbF <sub>6</sub>                | CsOAc                                  | DCE                | 46        |
| 9 <sup>d</sup>        | AgSbF <sub>6</sub>                | CsOAc                                  | DCE                | 40        |
| 10 <sup>e</sup>       | AgSbF <sub>6</sub>                | CsOAc+ HOAc                            | DCE                | 58        |
| 11                    | AgSbF <sub>6</sub>                | NaOAc                                  | DCE                | 57        |
| 12                    | AgSbF <sub>6</sub>                | KOAc                                   | DCE                | 61        |
| 13                    | AgOTf                             | KOAc                                   | DCE                | 55        |
| 14                    | AgCO <sub>3</sub> CF <sub>3</sub> | KOAc                                   | DCE                | 55        |
| 15                    | AgBF <sub>4</sub>                 | KOAc                                   | DCE                | 60        |
| 16                    | AgOAc                             | KOAc                                   | DCE                | 40        |
| 17                    | AgSbF <sub>6</sub>                | KOAc                                   | Acetone            | 57        |
| 18                    | AgSbF <sub>6</sub>                | KOAc                                   | Toluene            | 20        |
| 19                    | AgSbF <sub>6</sub>                | KOAc                                   | DMF                | trace     |
| 20                    | AgSbF <sub>6</sub>                | KOAc                                   | CH <sub>3</sub> CN | 42        |
| 21                    | AgSbF <sub>6</sub>                | KOAc                                   | MeOH               | 0         |
| 22                    | AgSbF <sub>6</sub>                | KOAc                                   | 1,4-Dioxane        | 10        |
| 23 <sup>f</sup>       | AgSbF <sub>6</sub>                | KOAc                                   | DCE                | 30        |
| 24 <sup>g</sup>       | AgSbF <sub>6</sub>                | KOAc                                   | DCE                | 63        |
| <b>25<sup>h</sup></b> | <b>AgSbF<sub>6</sub></b>          | <b>KOAc</b>                            | <b>DCE</b>         | <b>66</b> |
| 26 <sup>i</sup>       | AgSbF <sub>6</sub>                | KOAc+HOAc                              | DCE                | 64        |
| 27                    | AgSbF <sub>6</sub>                | KOPiv                                  | DCE                | 45        |
| 28                    | AgSbF <sub>6</sub>                | NaOPiv                                 | DCE                | 50        |
| 29                    | AgSbF <sub>6</sub>                | CsOPiv                                 | DCE                | 25        |

<sup>a</sup>General reaction conditions: **1a** (0.1 mmol), **2a** (0.15 mmol), [Ru(*p*-cymene)Cl<sub>2</sub>]<sub>2</sub> (4 mol %), Ag salt (20 mol %), additive (0.2 mmol), in solvent (2 mL) at 80 °C in oil bath, under air, for 12 h. <sup>b</sup>Determined by crude <sup>1</sup>H NMR spectroscopy using CH<sub>2</sub>Br<sub>2</sub> as an internal standard. <sup>c</sup>[Cp\**Rh*Cl<sub>2</sub>]<sub>2</sub> (4 mol %). <sup>d</sup>[Cp\**Ir*Cl<sub>2</sub>]<sub>2</sub> (4 mol %). <sup>e</sup>Additive (CsOAc 0.2 mmol+HOAc 0.05 mmol). <sup>f</sup>Additive (0.05 mmol). <sup>g</sup>Additive (0.1 mmol). <sup>h</sup>Additive (0.3 mmol). <sup>i</sup>Additive (KOAc 0.2 mmol+HOAc 0.05 mmol). DCE: 1,2-dichloroethane. THF: tetrahydrofuran.

## IV. General procedures for the reaction

### (a) General procedure for the synthesis of **3aa**

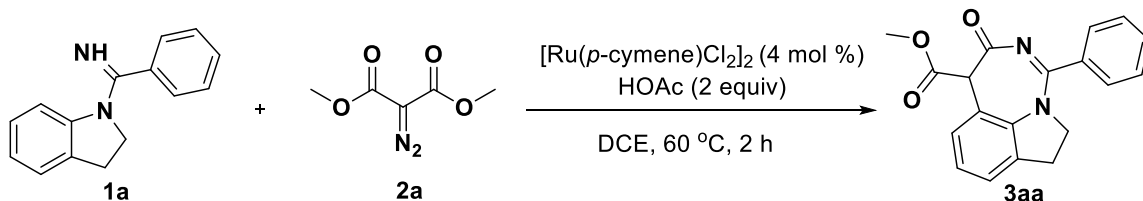

A pressure tube was charged with  $[\text{Ru}(p\text{-cymene})\text{Cl}_2]_2$  (9.8 mg, 4 mol %), HOAc (48 mg, 0.8 mmol), indolin-1-yl(phenyl)methanimine **1a** (88.9 mg, 0.4 mmol), dimethyl diazomalonate **2a** (94.9 mg, 0.6 mmol) and DCE (4 mL). The reaction mixture was stirred at 60 °C for 2 h. After that, the solvent was removed under reduced pressure and the residue was purified by silica gel chromatography using PE/EA = 2:1 to afford the product **3aa**.

### (b) General procedure for the synthesis of **5aa**

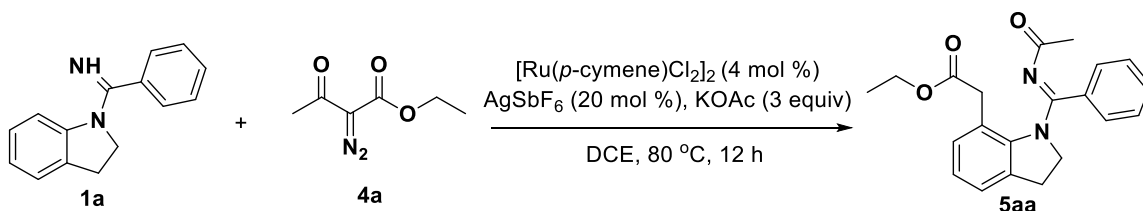

A pressure tube was charged with  $[\text{Ru}(p\text{-cymene})\text{Cl}_2]_2$  (9.8 mg, 4 mol %),  $\text{AgSbF}_6$  (27.5 mg, 20 mol %), KOAc (117.8 mg, 1.2 mmol), indolin-1-yl(phenyl)methanimine **1a** (88.9 mg, 0.4 mmol), ethyl diazoacetate **4a** (93.7 mg, 0.6 mmol) and DCE (4 mL). The reaction mixture was stirred at 80 °C for 12 h. After that, the solvent was removed under reduced pressure and the residue was purified by silica gel chromatography using PE/EA = 3:1 to afford the product **5aa**.

## V. Characterization Data for Substrates

### indolin-1-yl(phenyl)methanimine (**1a**)

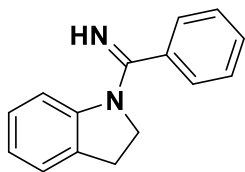

$^1\text{H NMR}$  (500 MHz,  $\text{DMSO-}d_6$ )  $\delta$  7.76 (s, 1H), 7.52 – 7.44 (m, 3H), 7.44 – 7.39 (m, 2H), 7.16 (d,  $J = 7.3$  Hz, 1H), 6.85 (t,  $J = 7.7$  Hz, 1H), 6.76 (t,  $J = 7.3$  Hz, 1H), 6.54 (s, 1H), 3.89 (t,  $J = 8.4$  Hz, 2H), 3.04 (t,  $J = 8.4$  Hz, 2H);  $^{13}\text{C NMR}$  (125 MHz,  $\text{DMSO-}d_6$ )  $\delta$  164.4, 145.0, 138.6, 132.8, 129.9, 129.2, 127.3, 126.8, 125.3, 121.2, 114.1,

50.9, 27.5; **HRMS (ESI) m/z**: calculated for C<sub>15</sub>H<sub>15</sub>N<sub>2</sub> (M+H)<sup>+</sup>: 223.123, found: 223.1234.

**(4-fluoroindolin-1-yl)(phenyl)methanimine (1b)**

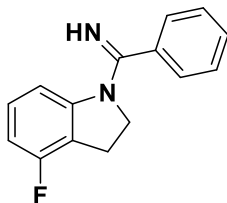

**<sup>1</sup>H NMR (500 MHz, DMSO-*d*<sub>6</sub>)** δ 10.33 (s, 1H), 7.79 – 7.73 (m, 1H), 7.71 – 7.62 (m, 4H), 7.00 – 6.91 (m, 2H), 5.53 (d, *J* = 7.4 Hz, 1H), 4.38 (t, *J* = 8.0 Hz, 2H), 3.33 (t, *J* = 7.9 Hz, 2H); **<sup>13</sup>C NMR (125 MHz, DMSO-*d*<sub>6</sub>)** δ 161.5, 158.6 (d, *J* = 244.5 Hz), 142.9 (d, *J* = 8.7 Hz), 132.9, 129.4, 129.0 (d, *J* = 7.9 Hz), 128.7, 128.6, 121.5 (d, *J* = 23.5 Hz), 112.2 (d, *J* = 19.9 Hz), 112.0 (d, *J* = 3.3 Hz), 53.2, 23.5; **HRMS (ESI) m/z**: calculated for C<sub>15</sub>H<sub>14</sub>FN<sub>2</sub> (M+H)<sup>+</sup>: 241.1136, found: 241.1133.

**(4-chloroindolin-1-yl)(phenyl)methanimine (1c)**

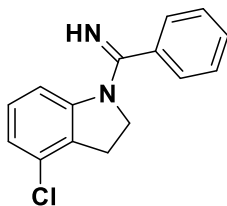

**<sup>1</sup>H NMR (600 MHz, Methanol-*d*<sub>4</sub>)** δ 7.82 – 7.75 (m, 1H), 7.75 – 7.60 (m, 4H), 7.15 (d, *J* = 8.0 Hz, 1H), 6.92 (t, *J* = 8.2 Hz, 1H), 5.87 (d, *J* = 8.4 Hz, 1H), 4.43 – 4.35 (m, 2H), 3.41 (t, *J* = 7.9 Hz, 2H); **<sup>13</sup>C NMR (150 MHz, Methanol-*d*<sub>4</sub>)** δ 162.8, 141.5, 133.4, 133.2, 131.4, 129.5, 128.7, 128.4, 128.3, 125.8, 114.6, 52.0, 26.7; **HRMS (ESI) m/z**: calculated for C<sub>15</sub>H<sub>14</sub>ClN<sub>2</sub> (M+H)<sup>+</sup>: 257.084, found: 257.0837.

**(4-bromoindolin-1-yl)(phenyl)methanimine (1d)**

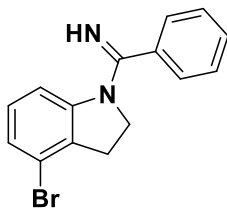

**<sup>1</sup>H NMR (600 MHz, DMSO-*d*<sub>6</sub>)** δ 10.29 (s, 1H), 7.78 – 7.73 (m, 1H), 7.72 – 7.60 (m, 4H), 7.31 (d, *J* = 8.0 Hz, 1H), 6.88 (t, *J* = 8.2 Hz, 1H), 5.68 (s, 1H), 4.34 (t, *J* = 7.9 Hz, 2H), 3.27 (t, *J* = 7.9 Hz, 2H); **<sup>13</sup>C NMR (150 MHz, DMSO-*d*<sub>6</sub>)** δ 162.1, 142.0, 135.9, 133.5, 129.9, 129.3, 129.2, 129.0, 128.7, 120.2, 115.4, 52.7, 29.4; **HRMS (ESI) m/z**: calculated for C<sub>15</sub>H<sub>14</sub>BrN<sub>2</sub> (M+H)<sup>+</sup>: 301.0335, found: 301.0332.

**(5-methoxyindolin-1-yl)(phenyl)methanimine (1e)**

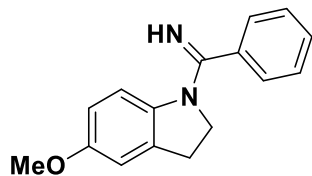

**<sup>1</sup>H NMR (500 MHz, Chloroform-*d*)** δ 7.47 – 7.39 (m, 5H), 6.79 – 6.71 (m, 1H), 6.40 (dd, *J* = 8.8, 2.7 Hz, 1H), 6.22 (s, 1H), 4.07 (t, *J* = 8.3 Hz, 2H), 3.71 (s, 3H), 3.09 (t, *J* = 8.3 Hz, 2H); **<sup>13</sup>C NMR (125 MHz, Chloroform-*d*)** δ 165.3, 154.8, 138.2, 138.1, 134.1, 129.7, 128.9, 127.0, 114.5, 111.4, 111.4, 55.7, 50.8, 27.9; **HRMS (ESI) m/z**: calculated for C<sub>16</sub>H<sub>17</sub>N<sub>2</sub>O (M+H)<sup>+</sup>: 253.1335, found: 253.1328.

**(5-methylindolin-1-yl)(phenyl)methanimine (1f)**

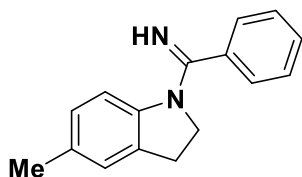

**<sup>1</sup>H NMR (500 MHz, Chloroform-*d*)** δ 7.48 – 7.39 (m, 5H), 6.98 (s, 1H), 6.63 (d, *J* = 8.1 Hz, 1H), 6.04 (d, *J* = 8.3 Hz, 1H), 4.09 (t, *J* = 8.4 Hz, 2H), 3.08 (t, *J* = 8.3 Hz, 2H), 2.22 (s, 3H); **<sup>13</sup>C NMR (125 MHz, Chloroform-*d*)** δ 165.5, 142.0, 138.3, 132.8, 130.8, 129.7, 128.9, 127.1, 127.0, 125.7, 113.6, 50.7, 27.6, 20.7; **HRMS (ESI) m/z**: calculated for C<sub>16</sub>H<sub>17</sub>N<sub>2</sub> (M+H)<sup>+</sup>: 237.1386, found: 237.1389.

**(5-nitroindolin-1-yl)(phenyl)methanimine (1g)**

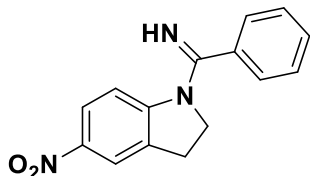

**<sup>1</sup>H NMR (500 MHz, DMSO-*d*<sub>6</sub>)** δ 8.61 (s, 1H), 8.05 – 8.01 (m, 1H), 7.89 (dd, *J* = 9.0, 2.5 Hz, 1H), 7.54 – 7.43 (m, 5H), 6.96 (s, 1H), 3.99 (t, *J* = 8.6 Hz, 2H), 3.15 (t, *J* = 8.6 Hz, 2H); **<sup>13</sup>C NMR (125 MHz, DMSO-*d*<sub>6</sub>)** δ 164.4, 151.2, 140.9, 137.4, 134.6, 130.4, 129.4, 127.3, 124.6, 120.8, 113.3, 52.1, 26.8; **HRMS (ESI) m/z**: calculated for C<sub>15</sub>H<sub>14</sub>N<sub>3</sub>O<sub>2</sub> (M+H)<sup>+</sup>: 268.1081, found: 268.1079.

**(5-fluoroindolin-1-yl)(phenyl)methanimine (1h)**

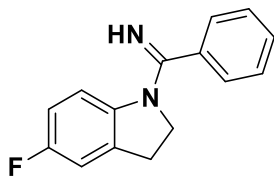

**<sup>1</sup>H NMR (500 MHz, Methanol-*d*<sub>4</sub>)** δ 7.81 – 7.76 (m, 1H), 7.72 – 7.63 (m, 4H), 7.21 – 7.12 (m, 1H), 6.68 (s, 1H), 5.88 (s, 1H), 4.36 (t, *J* = 7.8 Hz, 2H), 3.40



(t,  $J = 7.8$  Hz, 2H);  $^{13}\text{C}$  NMR (125 MHz, Methanol- $d_4$ )  $\delta$  161.4, 160.4 (d,  $J = 241.6$  Hz), 137.2 (d,  $J = 8.5$  Hz), 135.7, 132.6, 129.1, 128.1, 127.9, 116.9 (d,  $J = 8.9$  Hz), 112.9 (d,  $J = 24.4$  Hz), 112.4 (d,  $J = 24.4$  Hz), 52.2, 26.8; HRMS (ESI)  $m/z$ : calculated for  $\text{C}_{15}\text{H}_{14}\text{FN}_2$  ( $\text{M}+\text{H}$ ) $^+$ : 241.1136, found: 241.1133.

**(5-chloroindolin-1-yl)(phenyl)methanimine (1i)**

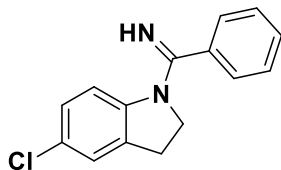

$^1\text{H}$  NMR (600 MHz, DMSO- $d_6$ )  $\delta$  7.89 (s, 1H), 7.50 – 7.45 (m, 3H), 7.44 – 7.37 (m, 2H), 7.25 – 7.18 (m, 1H), 6.95 (dd,  $J = 8.6, 2.3$  Hz, 1H), 6.82 (s, 1H), 3.87 (t,  $J = 8.5$  Hz, 2H), 3.04 (t,  $J = 8.5$  Hz, 2H);  $^{13}\text{C}$  NMR (150 MHz, DMSO- $d_6$ )  $\delta$  164.4, 144.1, 138.3, 135.3, 130.0, 129.3, 127.2, 126.6, 125.2, 124.7, 115.4, 51.3, 27.4; HRMS (ESI)  $m/z$ : calculated for  $\text{C}_{15}\text{H}_{14}\text{ClN}_2$  ( $\text{M}+\text{H}$ ) $^+$ : 257.084, found: 257.0839.

**(5-bromoindolin-1-yl)(phenyl)methanimine (1j)**

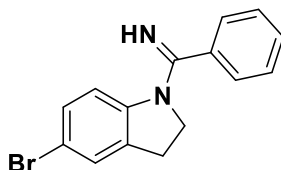

$^1\text{H}$  NMR (500 MHz, Chloroform- $d$ )  $\delta$  7.51 – 7.34 (m, 5H), 7.24 (d,  $J = 2.1$  Hz, 1H), 6.94 (dd,  $J = 8.6, 2.1$  Hz, 1H), 6.18 (d,  $J = 8.6$  Hz, 1H), 4.07 (t,  $J = 8.5$  Hz, 2H), 3.09 (t,  $J = 8.5$  Hz, 2H);  $^{13}\text{C}$  NMR (125 MHz, Chloroform- $d$ )  $\delta$  165.5, 143.6, 137.8, 134.9, 129.9, 129.5, 129.0, 127.9, 126.9, 115.3, 113.5, 50.8, 27.4; HRMS (ESI)  $m/z$ : calculated for  $\text{C}_{15}\text{H}_{14}\text{BrN}_2$  ( $\text{M}+\text{H}$ ) $^+$ : 301.0335, found: 301.033.

**(6-chloroindolin-1-yl)(phenyl)methanimine (1k)**

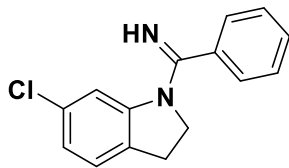

$^1\text{H}$  NMR (600 MHz, DMSO- $d_6$ )  $\delta$  7.52 – 7.47 (m, 3H), 7.44 – 7.40 (m, 2H), 7.16 (d,  $J = 7.9$  Hz, 1H), 6.92 (s, 1H), 6.83 (dd,  $J = 7.8, 2.0$  Hz, 1H), 3.87 (t,  $J = 8.5$  Hz, 2H), 3.02 (t,  $J = 8.5$  Hz, 2H);  $^{13}\text{C}$  NMR (125 MHz, DMSO- $d_6$ )  $\delta$  164.4, 146.3, 138.0, 131.9, 131.2, 130.1, 129.3, 127.2, 126.2, 120.9, 114.6, 51.6, 27.1; HRMS (ESI)  $m/z$ : calculated for  $\text{C}_{15}\text{H}_{14}\text{ClN}_2$  ( $\text{M}+\text{H}$ ) $^+$ : 257.084, found: 257.0843.

**(6-bromoindolin-1-yl)(phenyl)methanimine (1l)**

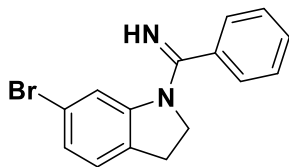

**<sup>1</sup>H NMR (500 MHz, DMSO-*d*<sub>6</sub>)** δ 10.29 (s, 1H), 7.82 – 7.76 (m, 1H), 7.70 – 7.65 (m, 4H), 7.33 (d, *J* = 7.9 Hz, 1H), 7.25 (dd, *J* = 8.0, 1.7 Hz, 1H), 5.73 (s, 1H), 4.31 (t, *J* = 8.0 Hz, 2H), 3.25 (t, *J* = 7.9 Hz, 2H); **<sup>13</sup>C NMR (125 MHz, DMSO-*d*<sub>6</sub>)** δ 162.0, 142.4, 135.0, 133.4, 130.0, 129.2, 129.1, 128.6, 128.1, 119.3, 119.2, 53.6, 27.4; **HRMS (ESI) *m/z***: calculated for C<sub>15</sub>H<sub>14</sub>BrN<sub>2</sub> (M+H)<sup>+</sup>: 301.0335, found: 301.0338.

**(5,6-dimethoxyindolin-1-yl)(phenyl)methanimine (1m)**

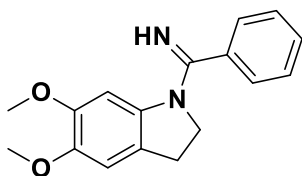

**<sup>1</sup>H NMR (600 MHz, Methanol-*d*<sub>4</sub>)** δ 7.83 – 7.77 (m, 1H), 7.77 – 7.66 (m, 4H), 6.99 (s, 1H), 5.44 (s, 1H), 4.35 (t, *J* = 7.7 Hz, 2H), 3.80 (s, 3H), 3.34 (d, *J* = 7.8 Hz, 2H), 3.26 (s, 3H); **<sup>13</sup>C NMR (150 MHz, Methanol-*d*<sub>4</sub>)** δ 160.3, 148.4, 147.9, 132.8, 132.6, 129.5, 129.0, 128.6, 126.9, 108.6, 100.9, 55.4, 54.6, 52.6, 27.1; **HRMS (ESI) *m/z***: calculated for C<sub>17</sub>H<sub>19</sub>N<sub>2</sub>O<sub>2</sub> (M+H)<sup>+</sup>: 283.1441, found: 283.144.

**(5,6-difluoroindolin-1-yl)(phenyl)methanimine (1n)**

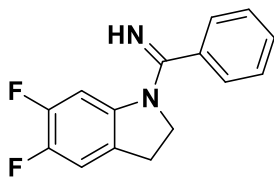

**<sup>1</sup>H NMR (500 MHz, Methanol-*d*<sub>4</sub>)** δ 7.85 – 7.80 (m, 1H), 7.73 – 7.68 (m, 4H), 7.37 – 7.30 (m, 1H), 5.70 (s, 1H), 4.38 (t, *J* = 7.9 Hz, 2H), 3.39 – 3.35 (m, 2H); **<sup>13</sup>C NMR (125 MHz, Methanol-*d*<sub>4</sub>)** δ 161.8, 148.1 (d, *J* = 245.2, 14.1 Hz), 147.9 (d, *J* = 247.7, 13.7 Hz), 135.6 (d, *J* = 9.8, 3.1 Hz), 132.9, 131.2 (dd, *J* = 6.9, 3.0 Hz), 129.2, 127.9, 127.7, 113.9 (d, *J* = 20.0 Hz), 105.3 (d, *J* = 24.7 Hz), 52.6, 26.4; **HRMS (ESI) *m/z***: calculated for C<sub>15</sub>H<sub>13</sub>F<sub>2</sub>N<sub>2</sub> (M+H)<sup>+</sup>: 259.1041, found: 259.1049.

**(5-bromo-4-fluoroindolin-1-yl)(phenyl)methanimine (1o)**

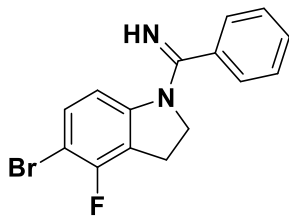

**<sup>1</sup>H NMR (500 MHz, Methanol-*d*<sub>4</sub>)**  $\delta$  7.82 – 7.76 (m, 1H), 7.71 – 7.64 (m, 4H), 7.18 (dd, *J* = 8.8, 6.9 Hz, 1H), 5.66 (d, *J* = 8.4 Hz, 1H), 4.41 (td, *J* = 8.0, 2.7 Hz, 2H), 3.43 (t, *J* = 7.9 Hz, 2H); **<sup>13</sup>C NMR (125 MHz, Methanol-*d*<sub>4</sub>)**  $\delta$  162.5, 155.0 (d, *J* = 246.9 Hz), 141.6 (d, *J* = 7.5 Hz), 132.8, 131.5, 129.1, 128.0, 127.8, 122.7 (d, *J* = 26.9 Hz), 112.6 (d, *J* = 3.4 Hz), 104.5 (d, *J* = 19.8 Hz), 52.4, 23.2; **HRMS (ESI) *m/z***: calculated for C<sub>15</sub>H<sub>13</sub>BrFN<sub>2</sub> (M+H)<sup>+</sup>: 319.0241, found: 319.0238.

**phenyl(spiro[cyclopentane-1,3'-indolin]-1'-yl)methanimine (1p)**

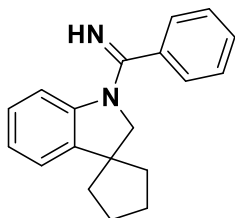

**<sup>1</sup>H NMR (600 MHz, DMSO-*d*<sub>6</sub>)**  $\delta$  10.19 (s, 1H), 7.79 – 7.74 (m, 1H), 7.71 – 7.63 (m, 4H), 7.41 (dd, *J* = 7.6, 1.2 Hz, 1H), 7.12 (t, *J* = 7.5 Hz, 1H), 6.92 (t, *J* = 7.9 Hz, 1H), 5.67 (s, 1H), 4.15 (s, 2H), 2.03 – 1.94 (m, 2H), 1.95 – 1.85 (m, 4H), 1.82 – 1.72 (m, 2H); **<sup>13</sup>C NMR (150 MHz, DMSO-*d*<sub>6</sub>)**  $\delta$  161.6, 142.2, 140.2, 133.5, 130.0, 129.2, 129.2, 127.6, 126.7, 124.2, 115.9, 65.6, 51.4, 39.9, 24.7; **HRMS (ESI) *m/z***: calculated for C<sub>19</sub>H<sub>21</sub>N<sub>2</sub> (M+H)<sup>+</sup>: 277.1699, found: 277.1702.

**indolin-1-yl(4-methoxyphenyl)methanimine (1q)**

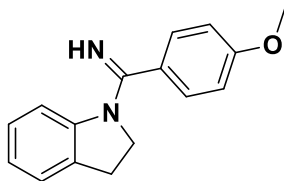

**<sup>1</sup>H NMR (500 MHz, Methanol-*d*<sub>4</sub>)**  $\delta$  7.67 – 7.61 (m, 2H), 7.38 (dd, *J* = 7.6, 1.3 Hz, 1H), 7.18 – 7.14 (m, 2H), 7.12 (td, *J* = 7.5, 0.9 Hz, 1H), 6.99 – 6.93 (m, 1H), 6.15 (d, *J* = 8.3 Hz, 1H), 4.32 (t, *J* = 7.9 Hz, 2H), 3.93 (s, 3H), 3.37 (t, *J* = 7.8 Hz, 2H); **<sup>13</sup>C NMR (125 MHz, Methanol-*d*<sub>4</sub>)**  $\delta$  163.9, 162.1, 140.4, 134.9, 130.7, 126.7, 126.0, 125.8, 120.3, 116.2, 114.7, 54.9, 52.8, 27.4; **HRMS (ESI) *m/z***: calculated for C<sub>16</sub>H<sub>17</sub>N<sub>2</sub>O (M+H)<sup>+</sup>: 253.1335, found: 253.1335.

**(4-fluorophenyl)(indolin-1-yl)methanimine (1r)**

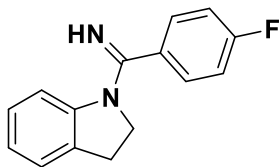

**<sup>1</sup>H NMR (600 MHz, Methanol-*d*<sub>4</sub>)** δ 7.82 – 7.73 (m, 2H), 7.44 – 7.37 (m, 3H), 7.15 (t, *J* = 7.5 Hz, 1H), 6.97 (d, *J* = 9.6 Hz, 1H), 6.00 (s, 1H), 4.34 (t, *J* = 7.8 Hz, 2H), 3.39 (t, *J* = 7.8 Hz, 2H); **<sup>13</sup>C NMR (150 MHz, Methanol-*d*<sub>4</sub>)** δ 165.1 (d, *J* = 253.8 Hz), 160.6, 139.4, 134.6, 131.0 (d, *J* = 9.2 Hz), 126.3, 125.9, 125.5, 124.5, 116.2 (d, *J* = 22.8 Hz), 115.7, 52.2, 26.8; **HRMS (ESI) m/z**: calculated for C<sub>15</sub>H<sub>14</sub>FN<sub>2</sub> (M+H)<sup>+</sup>: 241.1136, found: 241.1136.

**(3,5-dimethylphenyl)(indolin-1-yl)methanimine (1s)**

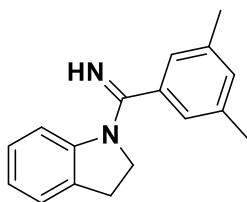

**<sup>1</sup>H NMR (600 MHz, DMSO-*d*<sub>6</sub>)** δ 10.05 (s, 1H), 7.42 – 7.35 (m, 2H), 7.29 (s, 2H), 7.08 (t, *J* = 7.5 Hz, 1H), 6.93 (t, *J* = 7.9 Hz, 1H), 5.79 (s, 1H), 4.29 (t, *J* = 7.9 Hz, 2H), 3.30 (t, *J* = 7.9 Hz, 2H), 2.34 (s, 6H); **<sup>13</sup>C NMR (150 MHz, DMSO-*d*<sub>6</sub>)** δ 161.5, 140.7, 139.4, 135.4, 134.6, 129.3, 127.2, 126.6, 126.3, 126.2, 116.1, 53.1, 27.6, 21.2; **HRMS (ESI) m/z**: calculated for C<sub>17</sub>H<sub>19</sub>N<sub>2</sub> (M+H)<sup>+</sup>: 251.1543, found: 251.155.

**indolin-1-yl(thiophen-2-yl)methanimine (1t)**

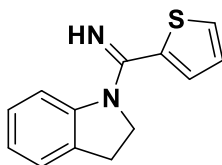

**<sup>1</sup>H NMR (600 MHz, Methanol-*d*<sub>4</sub>)** δ 8.04 (d, *J* = 5.0 Hz, 1H), 7.76 – 7.73 (m, 1H), 7.40 (d, *J* = 7.5 Hz, 1H), 7.34 (t, *J* = 4.4 Hz, 1H), 7.18 (t, *J* = 7.5 Hz, 1H), 7.05 (s, 1H), 6.31 (s, 1H), 4.36 (t, *J* = 7.7 Hz, 2H), 3.38 – 3.34 (m, 2H); **<sup>13</sup>C NMR (150 MHz, Methanol-*d*<sub>4</sub>)** δ 156.1, 140.0, 135.1, 133.9, 133.3, 128.3, 127.6, 126.8, 126.5, 125.9, 116.2, 53.6, 27.5; **HRMS (ESI) m/z**: calculated for C<sub>13</sub>H<sub>13</sub>N<sub>2</sub>S (M+H)<sup>+</sup>: 229.0794, found: 229.0796.

**1-(indolin-1-yl)ethan-1-imine (1u)**

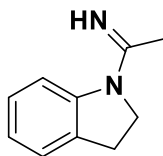

**<sup>1</sup>H NMR (500 MHz, DMSO-*d*<sub>6</sub>)** δ 9.64 (s, 1H), 7.52 (d, *J* = 8.2 Hz, 1H), 7.41 (dd, *J* = 7.4, 1.4 Hz, 1H), 7.31 (td, *J* = 7.8, 1.4 Hz, 1H), 7.22 (t, *J* = 7.4 Hz, 1H), 4.11 (t, *J* = 8.1 Hz, 2H), 3.23 (t, *J* = 8.0 Hz, 2H), 2.66 (s, 3H); **<sup>13</sup>C NMR (125 MHz, DMSO-*d*<sub>6</sub>)** δ 162.1, 140.1, 134.7, 127.5, 126.1, 125.9, 116.4, 51.1, 26.9, 19.9; **HRMS (ESI) m/z**: calculated for C<sub>10</sub>H<sub>13</sub>N<sub>2</sub> (M+H)<sup>+</sup>: 161.1073, found: 161.1072.

#### cyclopropyl(indolin-1-yl)methanimine (**1v**)

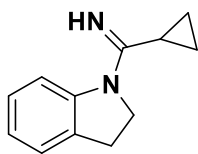

**<sup>1</sup>H NMR (500 MHz, DMSO-*d*<sub>6</sub>)** δ 9.34 (s, 1H), 7.73 (d, *J* = 8.2 Hz, 1H), 7.41 (dd, *J* = 7.4, 1.4 Hz, 1H), 7.30 (td, *J* = 7.8, 1.4 Hz, 1H), 7.22 (t, *J* = 7.4 Hz, 1H), 4.17 (t, *J* = 8.0 Hz, 2H), 3.23 (t, *J* = 7.9 Hz, 2H), 2.34 – 2.23 (m, 1H), 1.43 – 1.34 (m, 2H), 1.30 – 1.23 (m, 2H); **<sup>13</sup>C NMR (125 MHz, DMSO-*d*<sub>6</sub>)** δ 164.9, 140.1, 135.0, 127.4, 126.0, 125.9, 116.7, 52.4, 27.1, 13.9, 8.9; **HRMS (ESI) m/z**: calculated for C<sub>12</sub>H<sub>15</sub>N<sub>2</sub> (M+H)<sup>+</sup>: 187.123, found: 187.1227.

## VI. Characterization Data for Products

### methyl 6-oxo-4-phenyl-1,2,6,7-tetrahydro-[1,3]diazepino[6,7,1-*hi*]indole-7-carboxylate (**3aa**)

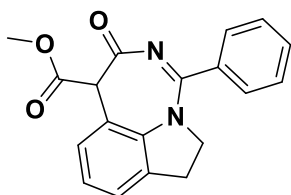

Following by general procedure for the synthesis of **3aa**. White solid, 120.5 mg, yield: 94% (purified by silica gel chromatography using PE/EA 5:1-1:1). **<sup>1</sup>H NMR (500 MHz, Chloroform-*d*)** δ 7.66 (dt, *J* = 6.7, 1.6 Hz, 2H), 7.52 – 7.42 (m, 3H), 7.32 – 7.26 (m, 2H), 7.20 – 7.13 (m, 1H), 5.04 (s, 1H), 4.34 (q, *J* = 10.0 Hz, 1H), 4.00 – 3.90 (m, 1H), 3.59 (s, 3H), 3.30 – 3.20 (m, 1H), 3.15 – 3.06 (m, 1H); **<sup>13</sup>C NMR (125 MHz, Chloroform-*d*)** δ 167.7, 163.1, 153.5, 139.9, 136.3, 134.5, 130.7, 128.7, 128.4, 128.2, 127.5, 124.8, 118.8, 63.0, 55.0, 52.7, 28.1; **HRMS (ESI) m/z**: calculated for C<sub>19</sub>H<sub>17</sub>N<sub>2</sub>O<sub>3</sub> (M+H)<sup>+</sup>: 321.1234, found: 321.1232.

**methyl 10-fluoro-6-oxo-4-phenyl-1,2,6,7-tetrahydro-[1,3]diazepino[6,7,1-*hi*]indole-7-carboxylate (3ba)**

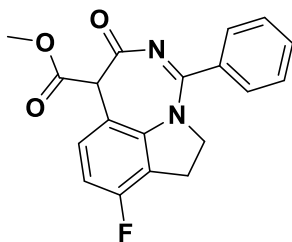

Following by general procedure for the synthesis of **3aa**. White solid, 109.6 mg, yield: 81% (purified by silica gel chromatography using PE/EA 5:1-1:1). **<sup>1</sup>H NMR (600 MHz, Chloroform-*d*)**  $\delta$  7.68 – 7.61 (m, 2H), 7.53 – 7.43 (m, 3H), 7.14 (dd,  $J = 8.7, 4.9$  Hz, 1H), 7.01 (t,  $J = 8.3$  Hz, 1H), 5.01 (s, 1H), 4.38 (q,  $J = 10.2$  Hz, 1H), 3.99 (ddd,  $J = 10.8, 9.2, 3.3$  Hz, 1H), 3.60 (s, 3H), 3.25 – 3.14 (m, 2H); **<sup>13</sup>C NMR (150 MHz, Chloroform-*d*)**  $\delta$  167.2, 162.6, 158.2 (d,  $J = 247.7$  Hz), 152.9, 141.7 (d,  $J = 8.7$  Hz), 135.5, 130.5, 130.0 (d,  $J = 8.2$  Hz), 128.3, 127.7, 119.7 (d,  $J = 22.7$  Hz), 114.2 (d,  $J = 21.3$  Hz), 114.1 (d,  $J = 3.2$  Hz), 61.8, 54.8, 52.4, 24.1; **HRMS (ESI) *m/z***: calculated for C<sub>19</sub>H<sub>16</sub>FN<sub>2</sub>O<sub>3</sub> (M+H)<sup>+</sup>: 339.1139, found: 339.1142.

**methyl 10-chloro-6-oxo-4-phenyl-1,2,6,7-tetrahydro-[1,3]diazepino[6,7,1-*hi*]indole-7-carboxylate (3ca)**

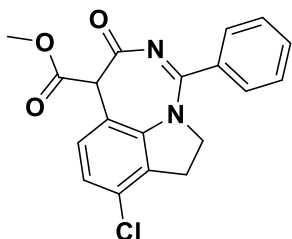

Following by general procedure for the synthesis of **3aa**. White solid, 110.7 mg, yield: 78% (purified by silica gel chromatography using PE/EA 5:1-1:1). **<sup>1</sup>H NMR (500 MHz, Chloroform-*d*)**  $\delta$  7.70 – 7.64 (m, 2H), 7.55 – 7.46 (m, 3H), 7.30 – 7.28 (m, 1H), 7.14 (d,  $J = 8.3$  Hz, 1H), 5.03 (s, 1H), 4.44 – 4.36 (m, 1H), 4.00 (ddd,  $J = 11.0, 9.5, 3.3$  Hz, 1H), 3.63 (s, 3H), 3.29 – 3.15 (m, 2H); **<sup>13</sup>C NMR (125 MHz, Chloroform-*d*)**  $\delta$  167.4, 162.8, 153.4, 141.1, 135.9, 132.7, 130.9, 130.8, 129.9, 128.7, 128.2, 127.2, 116.9, 62.5, 54.5, 52.8, 27.6; **HRMS (ESI) *m/z***: calculated for C<sub>19</sub>H<sub>16</sub>ClN<sub>2</sub>O<sub>3</sub> (M+H)<sup>+</sup>: 355.0844, found: 355.0853.

**methyl 10-bromo-6-oxo-4-phenyl-1,2,6,7-tetrahydro-[1,3]diazepino[6,7,1-*hi*]indole-7-carboxylate (3da)**

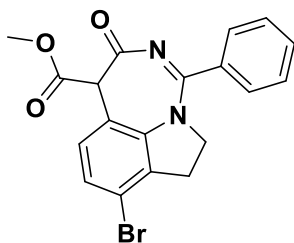

Following by general procedure for the synthesis of **3aa**. White solid, 121.4 mg, yield: 76% (purified by silica gel chromatography using PE/EA 5:1-1:1). **<sup>1</sup>H NMR (600 MHz, Chloroform-*d*)**  $\delta$  7.68 – 7.61 (m, 2H), 7.53 – 7.49 (m, 1H), 7.49 – 7.44 (m, 2H), 7.42 (d,  $J$  = 8.3 Hz, 1H), 7.05 (d,  $J$  = 8.3 Hz, 1H), 5.00 (s, 1H), 4.41 – 4.32 (m, 1H), 3.97 (ddd,  $J$  = 11.0, 9.7, 3.0 Hz, 1H), 3.60 (s, 3H), 3.24 – 3.17 (m, 1H), 3.12 (ddd,  $J$  = 16.6, 9.9, 3.0 Hz, 1H); **<sup>13</sup>C NMR (150 MHz, Chloroform-*d*)**  $\delta$  166.9, 162.2, 153.1, 140.4, 135.4, 134.6, 130.5, 129.7, 128.3, 127.7, 119.0, 116.9, 62.1, 53.8, 52.4, 29.2; **HRMS (ESI) m/z**: calculated for C<sub>19</sub>H<sub>16</sub>BrN<sub>2</sub>O<sub>3</sub> (M+H)<sup>+</sup>: 399.0339, found: 399.0351.

**methyl 9-methoxy-6-oxo-4-phenyl-1,2,6,7-tetrahydro-[1,3]diazepino[6,7,1-*hi*]indole-7-carboxylate (3ea)**

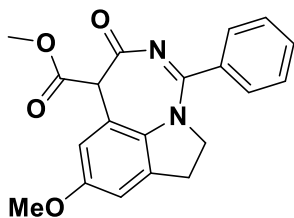

Following by general procedure for the synthesis of **3aa**. White solid, 67.3 mg, yield: 48% (purified by silica gel chromatography using PE/EA 5:1-1:1). **<sup>1</sup>H NMR (600 MHz, DMSO-*d*<sub>6</sub>)**  $\delta$  7.58 – 7.49 (m, 5H), 7.06 – 6.99 (m, 1H), 6.94 (d,  $J$  = 2.6 Hz, 1H), 5.06 (s, 1H), 4.31 (q,  $J$  = 9.7 Hz, 1H), 3.96 – 3.89 (m, 1H), 3.79 (s, 3H), 3.52 (s, 3H), 3.27 – 3.18 (m, 1H), 3.07 (ddd,  $J$  = 16.3, 9.5, 2.5 Hz, 1H); **<sup>13</sup>C NMR (150 MHz, DMSO-*d*<sub>6</sub>)**  $\delta$  167.1, 161.7, 159.1, 151.7, 137.1, 136.1, 132.9, 130.5, 128.5, 128.0, 119.5, 111.7, 111.6, 62.1, 55.7, 55.1, 52.4, 28.0; **HRMS (ESI) m/z**: calculated for C<sub>20</sub>H<sub>19</sub>N<sub>2</sub>O<sub>4</sub> (M+H)<sup>+</sup>: 351.1339, found: 351.1336.

**methyl 9-methyl-6-oxo-4-phenyl-1,2,6,7-tetrahydro-[1,3]diazepino[6,7,1-*hi*]indole-7-carboxylate (3fa)**

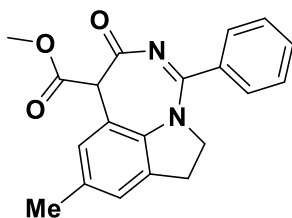

Following by general procedure for the synthesis of **3aa**. White solid, 104.3 mg, yield: 78% (purified by silica gel chromatography using PE/EA 5:1-1:1). **<sup>1</sup>H NMR (500 MHz, Chloroform-*d*)**  $\delta$  7.66 (dt,  $J = 6.6, 1.5$  Hz, 2H), 7.51 – 7.42 (m, 3H), 7.11 (s, 1H), 6.97 (s, 1H), 4.99 (s, 1H), 4.33 (q,  $J = 10.0$  Hz, 1H), 3.95 (ddd,  $J = 10.8, 9.5, 2.5$  Hz, 1H), 3.59 (s, 3H), 3.26 – 3.15 (m, 1H), 3.05 (ddd,  $J = 16.1, 9.5, 2.5$  Hz, 1H), 2.37 (s, 3H); **<sup>13</sup>C NMR (125 MHz, Chloroform-*d*)**  $\delta$  167.8, 163.2, 153.2, 137.9, 137.6, 136.3, 134.6, 130.7, 128.6, 128.6, 128.2, 125.7, 118.5, 62.9, 55.1, 52.7, 28.1, 21.1; **HRMS (ESI) *m/z***: calculated for C<sub>20</sub>H<sub>19</sub>N<sub>2</sub>O<sub>3</sub> (M+H)<sup>+</sup>: 335.139, found: 335.1384.

**methyl 9-nitro-6-oxo-4-phenyl-1,2,6,7-tetrahydro-[1,3]diazepino[6,7,1-*hi*]indole-7-carboxylate (3ga)**

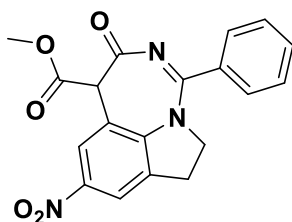

Following by general procedure for the synthesis of **3aa**. Light yellow solid, 106.7 mg, yield: 73% (purified by silica gel chromatography using PE/EA 5:1-1:1). **<sup>1</sup>H NMR (500 MHz, Chloroform-*d*)**  $\delta$  8.17 – 8.07 (m, 2H), 7.67 – 7.62 (m, 2H), 7.56 – 7.51 (m, 1H), 7.50 – 7.46 (m, 2H), 5.10 (s, 1H), 4.44 (q,  $J = 10.2$  Hz, 1H), 4.08 – 3.97 (m, 1H), 3.62 (s, 3H), 3.34 (dt,  $J = 16.4, 9.9$  Hz, 1H), 3.23 (ddd,  $J = 16.5, 9.9, 3.2$  Hz, 1H); **<sup>13</sup>C NMR (125 MHz, Chloroform-*d*)**  $\delta$  167.0, 162.3, 153.5, 145.8, 145.4, 136.1, 135.3, 131.3, 128.9, 128.2, 125.4, 120.1, 118.1, 62.7, 55.5, 53.1, 27.6; **HRMS (ESI) *m/z***: calculated for C<sub>19</sub>H<sub>16</sub>N<sub>3</sub>O<sub>5</sub> (M+H)<sup>+</sup>: 366.1084, found: 366.1075.

**methyl 9-fluoro-6-oxo-4-phenyl-1,2,6,7-tetrahydro-[1,3]diazepino[6,7,1-*hi*]indole-7-carboxylate (3ha)**

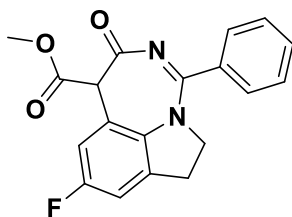

Following by general procedure for the synthesis of **3aa**. White



solid, 123.2 mg, yield: 91% (purified by silica gel chromatography using PE/EA 5:1-1:1). **<sup>1</sup>H NMR (600 MHz, DMSO-*d*<sub>6</sub>)** δ 7.59 – 7.50 (m, 5H), 7.37 – 7.26 (m, 2H), 5.14 (s, 1H), 4.35 (q, *J* = 9.9 Hz, 1H), 3.96 (td, *J* = 10.1, 2.7 Hz, 1H), 3.53 (s, 3H), 3.30 – 3.23 (m, 1H), 3.12 (ddd, *J* = 16.6, 9.5, 2.7 Hz, 1H); **<sup>13</sup>C NMR (150 MHz, DMSO-*d*<sub>6</sub>)** δ 166.8, 161.5, 161.0 (d, *J* = 243.3 Hz), 152.3, 138.1 (d, *J* = 9.7 Hz), 136.0, 135.9, 130.7, 128.6, 128.0, 119.7 (d, *J* = 9.6 Hz), 113.8 (d, *J* = 24.4 Hz), 112.6 (d, *J* = 24.7 Hz), 61.6, 55.3, 52.6, 27.9; **HRMS (ESI) m/z**: calculated for C<sub>19</sub>H<sub>16</sub>FN<sub>2</sub>O<sub>3</sub> (M+H)<sup>+</sup>: 339.1139, found: 339.114.

**methyl 9-chloro-6-oxo-4-phenyl-1,2,6,7-tetrahydro-[1,3]diazepino[6,7,1-*hi*]indole-7-carboxylate (3ia)**

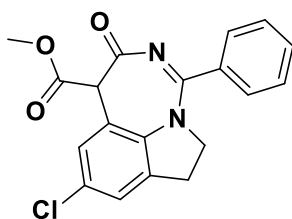

Following by general procedure for the synthesis of **3aa**. White solid, 113.5 mg, yield: 80% (purified by silica gel chromatography using PE/EA 5:1-1:1). **<sup>1</sup>H NMR (600 MHz, Chloroform-*d*)** δ 7.67 – 7.59 (m, 2H), 7.52 – 7.42 (m, 3H), 7.26 (d, *J* = 2.1 Hz, 1H), 7.19 – 7.14 (m, 1H), 4.96 (s, 1H), 4.35 (q, *J* = 10.2 Hz, 1H), 4.01 – 3.92 (m, 1H), 3.59 (s, 3H), 3.23 (dt, *J* = 16.2, 9.9 Hz, 1H), 3.09 (ddd, *J* = 16.3, 9.6, 2.6 Hz, 1H); **<sup>13</sup>C NMR (150 MHz, Chloroform-*d*)** δ 166.7, 162.1, 152.9, 138.2, 136.0, 135.4, 132.1, 130.5, 128.3, 127.7, 127.6, 124.7, 119.1, 62.1, 54.7, 52.4, 27.6; **HRMS (ESI) m/z**: calculated for C<sub>19</sub>H<sub>16</sub>ClN<sub>2</sub>O<sub>3</sub> (M+H)<sup>+</sup>: 355.0844, found: 355.0848.

**methyl 9-bromo-6-oxo-4-phenyl-1,2,6,7-tetrahydro-[1,3]diazepino[6,7,1-*hi*]indole-7-carboxylate (3ja)**

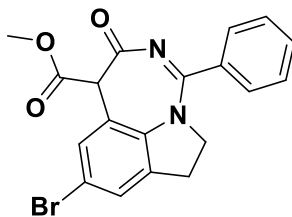

Following by general procedure for the synthesis of **3aa**. White solid, 140.5 mg, yield: 88% (purified by silica gel chromatography using PE/EA 5:1-1:1). **<sup>1</sup>H NMR (600 MHz, Chloroform-*d*)** δ 7.64 (d, *J* = 7.0 Hz, 2H), 7.52 – 7.40 (m, 4H), 7.32 (s, 1H), 4.96 (s, 1H), 4.36 (q, *J* = 10.2 Hz, 1H), 3.96 (td, *J* = 11.3, 10.6, 2.6 Hz, 1H), 3.60 (s, 3H), 3.25 (dt, *J* = 16.3, 9.9 Hz, 1H), 3.10 (ddd, *J* = 16.2, 9.6, 2.6 Hz, 1H); **<sup>13</sup>C NMR**

(150 MHz, Chloroform-*d*)  $\delta$  166.8, 162.1, 152.9, 138.7, 136.2, 135.4, 130.5, 130.5, 128.3, 127.7, 127.5, 119.6, 119.5, 62.0, 54.7, 52.4, 27.6; HRMS (ESI) *m/z*: calculated for C<sub>19</sub>H<sub>16</sub>BrN<sub>2</sub>O<sub>3</sub> (M+H)<sup>+</sup>: 399.0339, found: 399.0339.

**methyl 8-chloro-6-oxo-4-phenyl-1,2,6,7-tetrahydro-[1,3]diazepino[6,7,1-*hi*]indole-7-carboxylate (3ka)**

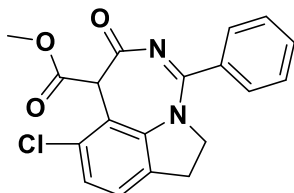

Following by general procedure for the synthesis of **3aa**. White solid, 78.1 mg, yield: 55% (purified by silica gel chromatography using PE/EA 5:1-1:1). <sup>1</sup>H NMR (500 MHz, DMSO-*d*<sub>6</sub>)  $\delta$  7.61 – 7.49 (m, 6H), 7.42 (d, *J* = 8.0 Hz, 1H), 5.50 (s, 1H), 4.36 (q, *J* = 10.1 Hz, 1H), 3.95 (td, *J* = 10.1, 2.3 Hz, 1H), 3.55 (s, 3H), 3.28 – 3.16 (m, 1H), 3.13 – 3.03 (m, 1H); <sup>13</sup>C NMR (125 MHz, DMSO-*d*<sub>6</sub>)  $\delta$  166.8, 161.9, 153.4, 141.6, 136.2, 135.5, 131.3, 131.0, 129.1, 128.4, 127.6, 126.3, 116.5, 59.5, 56.2, 53.3, 27.7; HRMS (ESI) *m/z*: calculated for C<sub>19</sub>H<sub>16</sub>ClN<sub>2</sub>O<sub>3</sub> (M+H)<sup>+</sup>: 355.0844, found: 355.0845.

**methyl 8-bromo-6-oxo-4-phenyl-1,2,6,7-tetrahydro-[1,3]diazepino[6,7,1-*hi*]indole-7-carboxylate (3la)**

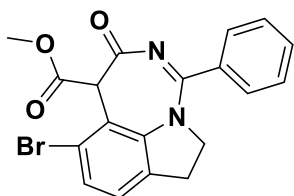

Following by general procedure for the synthesis of **3aa**. White solid, 47.9 mg, yield: 30% (purified by silica gel chromatography using PE/EA 5:1-1:1). <sup>1</sup>H NMR (500 MHz, Chloroform-*d*)  $\delta$  7.67 – 7.59 (m, 2H), 7.56 (d, *J* = 7.9 Hz, 1H), 7.52 – 7.43 (m, 3H), 7.13 (d, *J* = 7.9 Hz, 1H), 5.79 (s, 1H), 4.32 (q, *J* = 10.4 Hz, 1H), 3.95 (ddd, *J* = 11.1, 9.7, 2.3 Hz, 1H), 3.61 (s, 3H), 3.24 – 3.14 (m, 1H), 3.02 (ddd, *J* = 16.1, 9.5, 2.3 Hz, 1H); <sup>13</sup>C NMR (125 MHz, Chloroform-*d*)  $\delta$  167.2, 162.9, 153.7, 141.5, 136.2, 134.3, 131.1, 131.0, 128.8, 128.2, 125.7, 123.0, 118.9, 62.2, 55.7, 53.0, 27.9; HRMS (ESI) *m/z*: calculated for C<sub>19</sub>H<sub>16</sub>BrN<sub>2</sub>O<sub>3</sub> (M+H)<sup>+</sup>: 399.0339, found: 399.0345.

**methyl 8,9-dimethoxy-6-oxo-4-phenyl-1,2,6,7-tetrahydro-[1,3]diazepino[6,7,1-*hi*]indole-7-carboxylate (3ma)**

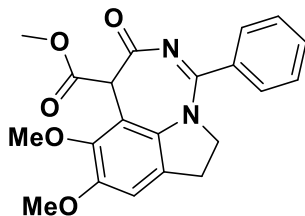

Following by general procedure (last for 12 h) for the synthesis of **3aa**. White solid, 41.1 mg, yield: 27% (purified by silica gel chromatography using PE/EA 5:1-1:1).  $^1\text{H NMR}$  (500 MHz, Chloroform-*d*)  $\delta$  7.66 – 7.59 (m, 2H), 7.49 – 7.40 (m, 3H), 6.91 (s, 1H), 5.56 (s, 1H), 4.39 – 4.25 (m, 1H), 3.95 – 3.90 (m, 1H), 3.88 (s, 3H), 3.85 (s, 3H), 3.58 (s, 3H), 3.27 – 3.14 (m, 1H), 3.01 (ddd,  $J = 15.7, 9.4, 2.1$  Hz, 1H);  $^{13}\text{C NMR}$  (125 MHz, Chloroform-*d*)  $\delta$  167.2, 163.1, 152.3, 151.7, 144.9, 135.8, 133.3, 130.1, 129.0, 128.1, 127.7, 114.1, 109.2, 61.5, 56.0, 55.2, 55.0, 52.2, 28.0; HRMS (ESI)  $m/z$ : calculated for  $\text{C}_{21}\text{H}_{21}\text{N}_2\text{O}_5$  (M+H) $^+$ : 381.1445, found: 381.1437.

**methyl 8,9-difluoro-6-oxo-4-phenyl-1,2,6,7-tetrahydro-[1,3]diazepino[6,7,1-*hi*] indole-7-carboxylate (3na)**

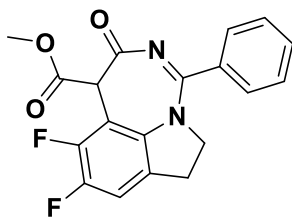

Following by general procedure for the synthesis of **3aa**. White solid, 125.4 mg, yield: 88% (purified by silica gel chromatography using PE/EA 5:1-1:1).  $^1\text{H NMR}$  (500 MHz, DMSO-*d*<sub>6</sub>)  $\delta$  7.62 – 7.55 (m, 4H), 7.55 – 7.50 (m, 2H), 5.25 (s, 1H), 4.40 (q,  $J = 10.0$  Hz, 1H), 3.96 (td,  $J = 10.1, 2.5$  Hz, 1H), 3.56 (s, 3H), 3.30 – 3.21 (m, 1H), 3.13 – 3.05 (m, 1H);  $^{13}\text{C NMR}$  (125 MHz, DMSO-*d*<sub>6</sub>)  $\delta$  166.4, 161.4, 152.8, 148.4 (dd,  $J = 245.1, 13.8$  Hz), 145.9 (dd,  $J = 243.7, 14.7$  Hz), 136.8, 136.0, 132.1 (dd,  $J = 7.6, 3.8$  Hz), 131.3, 129.1, 128.5, 114.5 (d,  $J = 20.0$  Hz), 108.7 (d,  $J = 17.6$  Hz), 56.1, 55.1, 53.4, 28.0; HRMS (ESI)  $m/z$ : calculated for  $\text{C}_{19}\text{H}_{15}\text{F}_2\text{N}_2\text{O}_3$  (M+H) $^+$ : 357.1045, found: 357.1046.

**methyl 9-bromo-10-fluoro-6-oxo-4-phenyl-1,2,6,7-tetrahydro-[1,3]diazepino[6,7,1-*hi*] indole-7-carboxylate (3oa)**

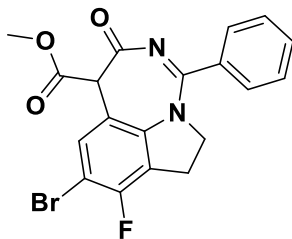

Following by general procedure for the synthesis of **3aa**. White solid, 103.5 mg, yield: 62% (purified by silica gel chromatography using PE/EA 5:1-1:1). **<sup>1</sup>H NMR (500 MHz, Chloroform-*d*)**  $\delta$  7.68 – 7.61 (m, 2H), 7.53 – 7.49 (m, 1H), 7.49 – 7.44 (m, 2H), 7.38 (d,  $J$  = 6.2 Hz, 1H), 4.95 (s, 1H), 4.41 (q,  $J$  = 10.2 Hz, 1H), 4.00 (ddd,  $J$  = 11.0, 9.1, 3.6 Hz, 1H), 3.61 (s, 3H), 3.31 – 3.15 (m, 2H); **<sup>13</sup>C NMR (125 MHz, Chloroform-*d*)**  $\delta$  167.2, 162.7, 154.9 (d,  $J$  = 248.1 Hz), 153.2, 141.5 (d,  $J$  = 7.8 Hz), 135.7, 133.3, 131.1, 128.8, 128.2, 121.6 (d,  $J$  = 23.6 Hz), 115.4 (d,  $J$  = 3.8 Hz), 107.0 (d,  $J$  = 21.2 Hz), 61.9, 55.4, 52.9, 24.9; **HRMS (ESI)  $m/z$** : calculated for C<sub>19</sub>H<sub>15</sub>BrFN<sub>2</sub>O<sub>3</sub> (M+H)<sup>+</sup>: 417.0245, found: 417.0241.

**methyl 6'-oxo-4'-phenyl-6',7'-dihydro-2'H-spiro[cyclopentane-1,1'-[1,3]diazepino[6,7,1-*hi*]indole]-7'-carboxylate (3pa)**

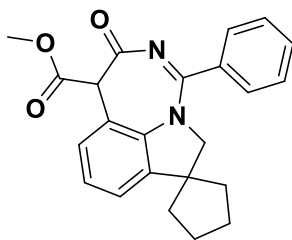

Following by general procedure for the synthesis of **3aa**. White solid, 112.3 mg, yield: 75% (purified by silica gel chromatography using PE/EA 5:1-1:1). **<sup>1</sup>H NMR (500 MHz, Chloroform-*d*)**  $\delta$  7.70 – 7.62 (m, 2H), 7.52 – 7.43 (m, 3H), 7.32 (t,  $J$  = 7.6 Hz, 1H), 7.24 (d,  $J$  = 7.5 Hz, 1H), 7.16 (d,  $J$  = 7.6 Hz, 1H), 5.05 (s, 1H), 4.13 (d,  $J$  = 10.7 Hz, 1H), 3.69 (d,  $J$  = 10.7 Hz, 1H), 3.59 (s, 3H), 2.23 – 2.15 (m, 1H), 1.90 – 1.74 (m, 4H), 1.73 – 1.66 (m, 1H), 1.62 – 1.52 (m, 2H); **<sup>13</sup>C NMR (125 MHz, Chloroform-*d*)**  $\delta$  167.7, 163.1, 153.3, 143.0, 139.0, 136.2, 130.7, 128.7, 128.4, 128.2, 127.9, 122.2, 118.8, 68.8, 63.0, 52.7, 51.6, 41.7, 38.3, 25.3, 25.0; **HRMS (ESI)  $m/z$** : calculated for C<sub>23</sub>H<sub>23</sub>N<sub>2</sub>O<sub>3</sub> (M+H)<sup>+</sup>: 375.1703, found: 375.1705.

**methyl 4-(4-methoxyphenyl)-6-oxo-1,2,6,7-tetrahydro-[1,3]diazepino[6,7,1-*hi*]indole-7-carboxylate (3qa)**

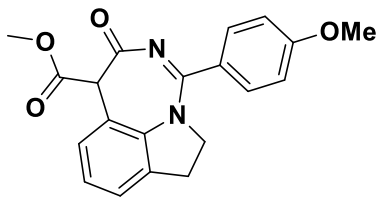

Following by general procedure for the synthesis of **3aa**.

White solid, 134.5 mg, yield: 96% (purified by silica gel chromatography using PE/EA 5:1-1:1). **<sup>1</sup>H NMR (500 MHz, Chloroform-*d*)**  $\delta$  7.71 – 7.59 (m, 2H), 7.33 – 7.23 (m, 2H), 7.19 – 7.11 (m, 1H), 7.01 – 6.90 (m, 2H), 5.02 (s, 1H), 4.39 (q,  $J = 10.1$  Hz, 1H), 4.02 (ddd,  $J = 10.9, 9.6, 2.6$  Hz, 1H), 3.85 (s, 3H), 3.58 (s, 3H), 3.24 (dt,  $J = 15.7, 9.8$  Hz, 1H), 3.10 (ddd,  $J = 16.0, 9.6, 2.6$  Hz, 1H); **<sup>13</sup>C NMR (125 MHz, Chloroform-*d*)**  $\delta$  167.7, 162.8, 161.7, 153.3, 140.0, 134.4, 130.2, 128.5, 128.4, 127.3, 124.7, 118.8, 113.9, 63.0, 55.5, 55.1, 52.6, 28.2; **HRMS (ESI) *m/z***: calculated for C<sub>20</sub>H<sub>19</sub>N<sub>2</sub>O<sub>4</sub> (M+H)<sup>+</sup>: 351.1339, found: 351.1346.

**methyl 4-(4-fluorophenyl)-6-oxo-1,2,6,7-tetrahydro-[1,3]diazepino[6,7,1-*hi*]indole-7-carboxylate (3ra)**

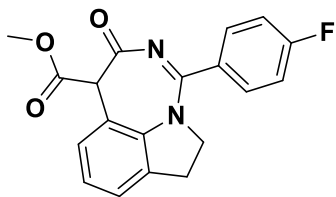

Following by general procedure for the synthesis of **3aa**. White solid, 115.0 mg, yield: 85% (purified by silica gel chromatography using PE/EA 5:1-1:1). **<sup>1</sup>H NMR (500 MHz, Chloroform-*d*)**  $\delta$  7.72 – 7.64 (m, 2H), 7.33 – 7.27 (m, 2H), 7.20 – 7.11 (m, 3H), 5.03 (s, 1H), 4.34 (q,  $J = 10.1$  Hz, 1H), 3.97 (ddd,  $J = 10.8, 9.6, 2.5$  Hz, 1H), 3.59 (s, 3H), 3.27 (dt,  $J = 15.7, 9.8$  Hz, 1H), 3.12 (ddd,  $J = 15.9, 9.6, 2.5$  Hz, 1H); **<sup>13</sup>C NMR (125 MHz, Chloroform-*d*)**  $\delta$  167.7, 164.1 (d,  $J = 251.5$  Hz), 162.9, 152.5, 139.8, 134.4, 132.4 (d,  $J = 3.3$  Hz), 130.5 (d,  $J = 8.7$  Hz), 128.5, 127.6, 124.9, 118.8, 115.8 (d,  $J = 21.9$  Hz), 62.9, 55.0, 52.7, 28.2; **HRMS (ESI) *m/z***: calculated for C<sub>19</sub>H<sub>16</sub>FN<sub>2</sub>O<sub>3</sub> (M+H)<sup>+</sup>: 339.1139, found: 339.1138.

**methyl 4-(3,5-dimethylphenyl)-6-oxo-1,2,6,7-tetrahydro-[1,3]diazepino[6,7,1-*hi*]indole-7-carboxylate (3sa)**

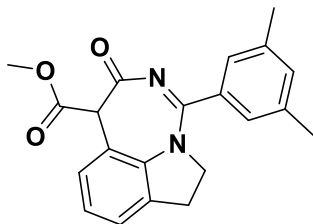

Following by general procedure for the synthesis of **3aa**. White solid, 111.5 mg, yield: 80% (purified by silica gel chromatography using PE/EA 5:1-1:1). **<sup>1</sup>H NMR (500 MHz, Chloroform-*d*)**  $\delta$  7.32 – 7.28 (m, 4H), 7.20 – 7.16 (m, 1H), 7.14 (s, 1H), 5.06 (s, 1H), 4.37 (q,  $J = 10.2$  Hz, 1H), 4.00 (ddd,  $J = 11.0, 9.6, 2.6$  Hz, 1H), 3.63 (s, 3H), 3.26 (dt,  $J = 15.7, 9.8$  Hz, 1H), 3.12 (ddd,  $J = 16.0, 9.6, 2.6$  Hz, 1H), 2.38 (s, 6H); **<sup>13</sup>C NMR (125 MHz, Chloroform-*d*)**  $\delta$  167.7, 163.1, 153.9, 139.9, 138.4, 136.2, 134.4, 132.4, 128.4, 127.4, 125.9, 124.8, 118.8, 63.0, 55.0, 52.7, 28.1, 21.2; **HRMS (ESI) *m/z***: calculated for C<sub>21</sub>H<sub>21</sub>N<sub>2</sub>O<sub>3</sub> (M+H)<sup>+</sup>: 349.1547, found: 349.1553.

**methyl 6-oxo-4-(thiophen-2-yl)-1,2,6,7-tetrahydro-[1,3]diazepino[6,7,1-*hi*]indole-7-carboxylate (3ta)**

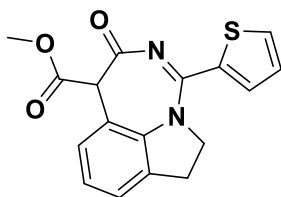

Following by general procedure for the synthesis of **3aa**. White solid, 104.4 mg, yield: 80% (purified by silica gel chromatography using PE/EA 5:1-1:1). **<sup>1</sup>H NMR (500 MHz, Chloroform-*d*)**  $\delta$  7.52 (ddd,  $J = 14.8, 4.4, 1.1$  Hz, 2H), 7.30 – 7.24 (m, 2H), 7.14 (dd,  $J = 6.9, 2.0$  Hz, 1H), 7.09 (dd,  $J = 5.1, 3.7$  Hz, 1H), 4.97 (s, 1H), 4.63 – 4.55 (m, 1H), 4.44 (ddd,  $J = 10.6, 9.5, 2.5$  Hz, 1H), 3.55 (s, 3H), 3.29 (dt,  $J = 15.8, 9.8$  Hz, 1H), 3.15 (ddd,  $J = 16.0, 9.5, 2.4$  Hz, 1H); **<sup>13</sup>C NMR (125 MHz, Chloroform-*d*)**  $\delta$  167.5, 162.6, 147.2, 139.8, 138.5, 134.3, 130.7, 130.3, 128.4, 127.6, 127.6, 124.8, 119.0, 62.9, 55.4, 52.6, 28.4; **HRMS (ESI) *m/z***: calculated for C<sub>17</sub>H<sub>15</sub>N<sub>2</sub>O<sub>3</sub>S (M+H)<sup>+</sup>: 327.0798, found: 327.0802.

**ethyl 6-oxo-4-phenyl-1,2,6,7-tetrahydro-[1,3]diazepino[6,7,1-*hi*]indole-7-carboxylate (3ab)**

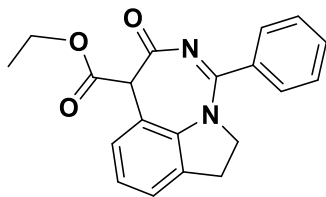

Following by general procedure for the synthesis of **3aa**. White solid, 121.7 mg, yield: 91% (purified by silica gel chromatography using PE/EA 5:1-1:1). **<sup>1</sup>H NMR (500 MHz, Chloroform-*d*)**  $\delta$  7.66 (dt,  $J$  = 6.8, 1.6 Hz, 2H), 7.50 – 7.42 (m, 3H), 7.31 – 7.27 (m, 2H), 7.19 – 7.14 (m, 1H), 5.02 (s, 1H), 4.33 (q,  $J$  = 10.2 Hz, 1H), 4.07 – 4.00 (m, 2H), 3.95 (ddd,  $J$  = 10.9, 9.6, 2.5 Hz, 1H), 3.24 (dt,  $J$  = 15.8, 9.8 Hz, 1H), 3.09 (ddd,  $J$  = 15.9, 9.6, 2.5 Hz, 1H), 1.11 (t,  $J$  = 7.1 Hz, 3H); **<sup>13</sup>C NMR (125 MHz, Chloroform-*d*)**  $\delta$  167.1, 163.2, 153.4, 139.9, 136.3, 134.4, 130.7, 128.6, 128.4, 128.2, 127.5, 124.8, 118.9, 63.2, 61.7, 55.0, 28.2, 13.9; **HRMS (ESI) *m/z***: calculated for C<sub>20</sub>H<sub>19</sub>N<sub>2</sub>O<sub>3</sub> (M+H)<sup>+</sup>: 335.139, found: 335.1395.

**isopropyl 6-oxo-4-phenyl-1,2,6,7-tetrahydro-[1,3]diazepino[6,7,1-*hi*]indole-7-carboxylate(3ac)**

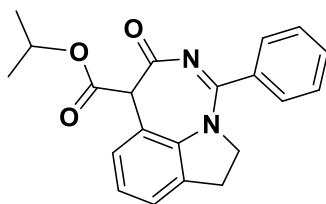

Following by general procedure for the synthesis of **3aa**. White solid, 103.1 mg, yield: 74% (purified by silica gel chromatography using PE/EA 5:1-1:1). **<sup>1</sup>H NMR (500 MHz, Chloroform-*d*)**  $\delta$  7.70 – 7.63 (m, 2H), 7.50 – 7.41 (m, 3H), 7.29 (d,  $J$  = 4.7 Hz, 2H), 7.20 – 7.13 (m, 1H), 5.00 (s, 1H), 4.90 – 4.77 (m, 1H), 4.34 (q,  $J$  = 10.2 Hz, 1H), 4.03 – 3.89 (m, 1H), 3.25 (dt,  $J$  = 15.7, 9.9 Hz, 1H), 3.10 (ddd,  $J$  = 15.8, 9.5, 2.5 Hz, 1H), 1.19 (d,  $J$  = 6.3 Hz, 3H), 0.97 (d,  $J$  = 6.2 Hz, 3H); **<sup>13</sup>C NMR (125 MHz, Chloroform-*d*)**  $\delta$  166.6, 163.4, 153.2, 139.9, 136.2, 134.3, 130.7, 128.5, 128.5, 128.3, 127.4, 124.7, 119.0, 69.4, 63.5, 55.0, 28.2, 21.6, 21.1; **HRMS (ESI) *m/z***: calculated for C<sub>21</sub>H<sub>21</sub>N<sub>2</sub>O<sub>3</sub> (M+H)<sup>+</sup>: 349.1547, found: 349.1551.

**tert-butyl 6-oxo-4-phenyl-1,2,6,7-tetrahydro-[1,3]diazepino[6,7,1-*hi*]indole-7-carboxylate (3ad)**

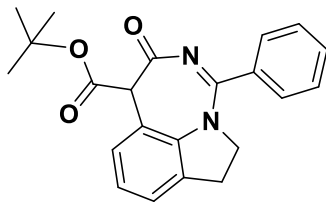

Following by general procedure for the synthesis of **3aa**. White solid, 53.6 mg, yield: 37% (purified by silica gel chromatography using PE/EA 5:1-1:1). <sup>1</sup>H NMR (500 MHz, Chloroform-*d*) δ 7.71 – 7.63 (m, 2H), 7.49 – 7.41 (m, 3H), 7.30 – 7.27 (m, 2H), 7.18 – 7.13 (m, 1H), 4.97 (s, 1H), 4.36 (q, *J* = 10.2 Hz, 1H), 4.03 – 3.89 (m, 1H), 3.24 (dt, *J* = 15.8, 9.8 Hz, 1H), 3.09 (ddd, *J* = 15.9, 9.5, 2.3 Hz, 1H), 1.28 (s, 9H); <sup>13</sup>C NMR (125 MHz, Chloroform-*d*) δ 166.0, 163.8, 153.1, 140.0, 136.2, 134.2, 130.6, 128.6, 128.4, 128.4, 127.4, 124.6, 119.1, 82.1, 64.3, 54.9, 28.2, 27.7; HRMS (ESI) *m/z*: calculated for C<sub>22</sub>H<sub>23</sub>N<sub>2</sub>O<sub>3</sub> (M+H)<sup>+</sup>: 363.1703, found: 363.1715.

**butyl 6-oxo-4-phenyl-1,2,6,7-tetrahydro-[1,3]diazepino[6,7,1-*hi*]indole-7-carboxylate (3ae)**

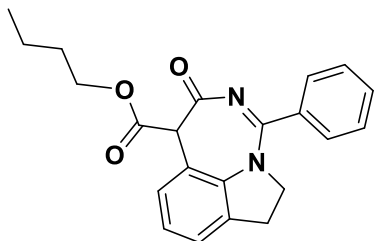

Following by general procedure for the synthesis of **3aa**. White solid, 101.5 mg, yield: 70% (purified by silica gel chromatography using PE/EA 5:1-1:1). <sup>1</sup>H NMR (600 MHz, Chloroform-*d*) δ 7.71 – 7.62 (m, 2H), 7.52 – 7.40 (m, 3H), 7.35 – 7.26 (m, 2H), 7.16 (t, *J* = 4.5 Hz, 1H), 5.03 (s, 1H), 4.35 (q, *J* = 10.2 Hz, 1H), 4.03 (dt, *J* = 10.6, 6.5 Hz, 1H), 3.99 – 3.90 (m, 2H), 3.25 (dt, *J* = 15.8, 9.9 Hz, 1H), 3.10 (ddd, *J* = 15.9, 9.6, 2.4 Hz, 1H), 1.48 – 1.39 (m, 2H), 1.23 – 1.15 (m, 2H), 0.70 (t, *J* = 7.4 Hz, 3H); <sup>13</sup>C NMR (150 MHz, Chloroform-*d*) δ 167.2, 163.2, 153.4, 139.9, 136.2, 134.4, 130.7, 128.6, 128.4, 128.3, 127.5, 124.7, 118.9, 65.5, 63.2, 55.0, 30.4, 28.2, 18.8, 13.5; HRMS (ESI) *m/z*: calculated for C<sub>22</sub>H<sub>23</sub>N<sub>2</sub>O<sub>3</sub> (M+H)<sup>+</sup>: 363.1703, found: 363.1698.

**benzyl 6-oxo-4-phenyl-1,2,6,7-tetrahydro-[1,3]diazepino[6,7,1-*hi*]indole-7-carboxylate (3af)**



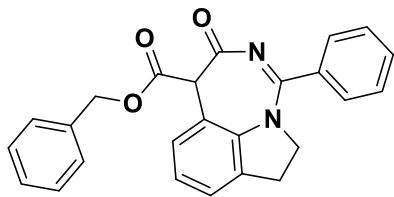

Following by general procedure for the synthesis of **3aa**.

White solid, 145.9 mg, yield: 92% (purified by silica gel chromatography using PE/EA 5:1-1:1). **<sup>1</sup>H NMR (600 MHz, Chloroform-*d*)**  $\delta$  7.57 (d,  $J$  = 7.5 Hz, 2H), 7.48 (t,  $J$  = 7.4 Hz, 1H), 7.41 (t,  $J$  = 7.5 Hz, 2H), 7.30 (d,  $J$  = 4.7 Hz, 2H), 7.25 – 7.05 (m, 6H), 5.10 (s, 1H), 5.03 (s, 2H), 4.30 (q,  $J$  = 10.2 Hz, 1H), 3.94 (td,  $J$  = 10.2, 2.4 Hz, 1H), 3.24 (dt,  $J$  = 15.9, 9.8 Hz, 1H), 3.09 (ddd,  $J$  = 15.9, 9.6, 2.4 Hz, 1H); **<sup>13</sup>C NMR (150 MHz, Chloroform-*d*)**  $\delta$  166.9, 162.9, 153.4, 139.9, 136.1, 135.2, 134.4, 130.6, 128.6, 128.5, 128.3, 128.3, 128.2, 127.9, 127.5, 124.8, 118.8, 67.2, 63.2, 55.0, 28.2; **HRMS (ESI)  $m/z$** : calculated for C<sub>25</sub>H<sub>21</sub>N<sub>2</sub>O<sub>3</sub> (M+H)<sup>+</sup>: 397.1547, found: 397.1545.

**ethyl 2-(1-((acetylimino)(phenyl)methyl)indolin-7-yl)acetate (5aa)**

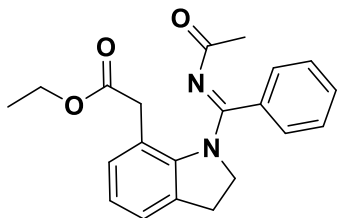

Following by general procedure for the synthesis of **5aa**. White

solid, 89.7 mg, yield: 64% (purified by silica gel chromatography using PE/EA 5:1-1:1). **<sup>1</sup>H NMR (600 MHz, Chloroform-*d*)**  $\delta$  7.49 – 7.41 (m, 5H), 7.18 – 7.14 (m, 1H), 7.12 – 7.08 (m, 2H), 4.14 (q,  $J$  = 7.1 Hz, 2H), 3.79 (t,  $J$  = 7.5 Hz, 2H), 3.74 (s, 2H), 2.99 (t,  $J$  = 7.5 Hz, 2H), 1.99 (s, 3H), 1.23 (t,  $J$  = 7.2 Hz, 3H); **<sup>13</sup>C NMR (150 MHz, Chloroform-*d*)**  $\delta$  183.8, 171.3, 158.5, 142.0, 135.5, 135.0, 130.9, 129.8, 129.0, 128.2, 125.8, 125.4, 123.7, 60.8, 54.5, 39.7, 29.9, 27.0, 14.2; **HRMS (ESI)  $m/z$** : calculated for C<sub>21</sub>H<sub>23</sub>N<sub>2</sub>O<sub>3</sub> (M+H)<sup>+</sup>: 351.1703, found: 351.1696.

**ethyl 2-(1-((acetylimino)(phenyl)methyl)-4-fluoroindolin-7-yl)acetate (5ba)**

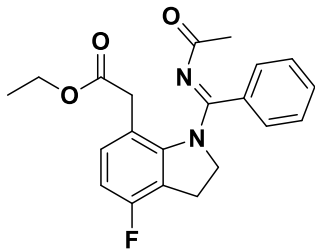

Following by general procedure for the synthesis of **5aa**. Yellow

solid, 88.4 mg, yield: 60% (purified by silica gel chromatography using PE/EA 5:1-1:1).  $^1\text{H NMR}$  (600 MHz, Chloroform-*d*)  $\delta$  7.52 – 7.41 (m, 5H), 7.08 (dd,  $J = 8.6, 5.4$  Hz, 1H), 6.82 (t,  $J = 8.3$  Hz, 1H), 4.13 (q,  $J = 7.1$  Hz, 2H), 3.81 (t,  $J = 7.6$  Hz, 2H), 3.70 (s, 2H), 3.00 (t,  $J = 7.6$  Hz, 2H), 1.98 (s, 3H), 1.22 (t,  $J = 7.2$  Hz, 3H);  $^{13}\text{C NMR}$  (150 MHz, Chloroform-*d*)  $\delta$  183.2, 170.7, 157.6, 157.6 (d,  $J = 245.4$  Hz), 143.8 (d,  $J = 7.5$  Hz), 134.2, 131.0 (d,  $J = 7.8$  Hz), 130.6, 128.6, 127.7, 121.0 (d,  $J = 21.5$  Hz), 120.7 (d,  $J = 3.5$  Hz), 112.1 (d,  $J = 20.5$  Hz), 60.4, 54.2, 38.7, 26.4, 25.5, 13.7; HRMS (ESI)  $m/z$ : calculated for  $\text{C}_{21}\text{H}_{22}\text{FN}_2\text{O}_3$  (M+H) $^+$ : 369.1609, found: 369.1604.

**ethyl 2-(1-((acetylimino)(phenyl)methyl)-4-chloroindolin-7-yl)acetate (5ca)**

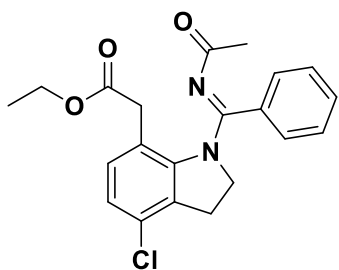

Following by general procedure for the synthesis of **5aa**.

Yellow solid, 98.5 mg, yield: 64% (purified by silica gel chromatography using PE/EA 5:1-1:1).  $^1\text{H NMR}$  (600 MHz, Chloroform-*d*)  $\delta$  7.54 – 7.39 (m, 5H), 7.15 – 7.02 (m, 2H), 4.13 (q,  $J = 7.1$  Hz, 2H), 3.81 (t,  $J = 7.6$  Hz, 2H), 3.70 (s, 2H), 3.02 (t,  $J = 7.6$  Hz, 2H), 1.99 (s, 3H), 1.23 (t,  $J = 7.2$  Hz, 3H);  $^{13}\text{C NMR}$  (150 MHz, Chloroform-*d*)  $\delta$  183.2, 170.5, 157.7, 142.8, 134.1, 133.4, 130.8, 130.7, 128.8, 128.6, 127.7, 125.1, 123.3, 60.4, 53.5, 38.8, 28.7, 26.4, 13.7; HRMS (ESI)  $m/z$ : calculated for  $\text{C}_{21}\text{H}_{22}\text{ClN}_2\text{O}_3$  (M+H) $^+$ : 385.1313, found: 385.1305.

**ethyl 2-(1-((acetylimino)(phenyl)methyl)-4-bromoindolin-7-yl)acetate (5da)**

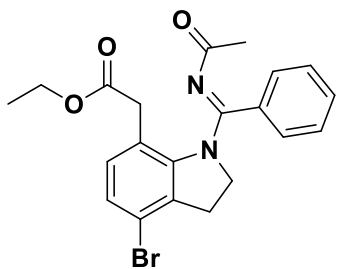

Following by general procedure for the synthesis of **5aa**. White

solid, 125.4 mg, yield: 73% (purified by silica gel chromatography using PE/EA 5:1-1:1).  $^1\text{H NMR}$  (500 MHz, Chloroform-*d*)  $\delta$  7.52 – 7.43 (m, 5H), 7.24 (s, 1H), 7.01 (d,  $J = 8.3$  Hz, 1H), 4.14 (q,  $J = 7.2$  Hz, 2H), 3.81 (t,  $J = 7.5$  Hz, 2H), 3.68 (s, 2H), 3.01 (t,  $J = 7.6$  Hz,

2H), 2.00 (s, 3H), 1.23 (t,  $J = 7.1$  Hz, 3H);  $^{13}\text{C}$  NMR (125 MHz, Chloroform-*d*)  $\delta$  183.6, 170.8, 158.3, 143.1, 136.0, 134.5, 131.5, 131.2, 129.1, 128.5, 128.2, 124.4, 118.1, 60.9, 53.7, 39.3, 31.3, 26.9, 14.2; HRMS (ESI)  $m/z$ : calculated for  $\text{C}_{21}\text{H}_{22}\text{BrN}_2\text{O}_3$  (M+H) $^+$ : 429.0808, found: 429.0804.

**ethyl 2-(1-((acetylimino)(phenyl)methyl)-5-methylindolin-7-yl)acetate (5fa)**

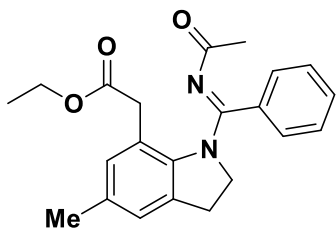

Following by general procedure for the synthesis of **5aa**. Yellow oil, 83.1 mg, yield: 57% (purified by silica gel chromatography using PE/EA 5:1-1:1).  $^1\text{H}$  NMR (600 MHz, Chloroform-*d*)  $\delta$  7.44 (dt,  $J = 14.2, 7.4$  Hz, 5H), 6.98 (s, 1H), 6.92 (s, 1H), 4.14 (q,  $J = 7.1$  Hz, 2H), 3.77 (t,  $J = 7.5$  Hz, 2H), 3.70 (s, 2H), 2.94 (t,  $J = 7.5$  Hz, 2H), 2.31 (s, 3H), 1.99 (s, 3H), 1.23 (t,  $J = 7.2$  Hz, 3H);  $^{13}\text{C}$  NMR (150 MHz, Chloroform-*d*)  $\delta$  183.8, 171.4, 158.7, 139.7, 135.7, 135.6, 135.1, 130.9, 130.4, 129.0, 128.2, 125.0, 124.5, 60.8, 54.7, 39.6, 29.9, 27.0, 21.1, 14.2; HRMS (ESI)  $m/z$ : calculated for  $\text{C}_{22}\text{H}_{25}\text{N}_2\text{O}_3$  (M+H) $^+$ : 365.186, found: 365.1866.

**ethyl 2-(1-((acetylimino)(phenyl)methyl)-5-nitroindolin-7-yl)acetate (5ga)**

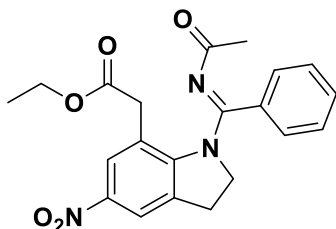

Following by general procedure for the synthesis of **5aa**. Yellow solid, 98.1mg, yield: 62% (purified by silica gel chromatography using PE/EA 5:1-1:1).  $^1\text{H}$  NMR (500 MHz, Chloroform-*d*)  $\delta$  8.06 (d,  $J = 2.3$  Hz, 1H), 8.03 – 7.99 (m, 1H), 7.53 – 7.49 (m, 1H), 7.46 (d,  $J = 4.0$  Hz, 4H), 4.15 (q,  $J = 7.1$  Hz, 2H), 3.87 (t,  $J = 7.8$  Hz, 2H), 3.82 (s, 2H), 3.10 (t,  $J = 7.8$  Hz, 2H), 2.00 (s, 3H), 1.22 (t,  $J = 7.1$  Hz, 3H);  $^{13}\text{C}$  NMR (125 MHz, Chloroform-*d*)  $\delta$  183.4, 170.1, 157.2, 148.0, 145.0, 137.0, 133.9, 131.5, 129.3, 128.1, 126.6, 125.4, 119.1, 61.2, 54.7, 39.8, 29.3, 26.8, 14.1; HRMS (ESI)  $m/z$ : calculated for  $\text{C}_{21}\text{H}_{22}\text{N}_3\text{O}_5$  (M+H) $^+$ : 396.1554, found: 396.155.

**ethyl 2-(1-((acetylimino)(phenyl)methyl)-5-chloroindolin-7-yl)acetate (5ia)**

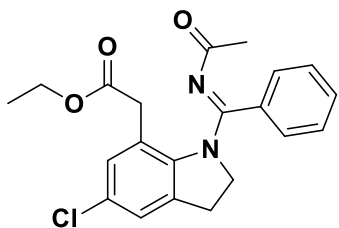

Following by general procedure for the synthesis of **5aa**.

Yellow solid, 120.1 mg, yield: 78% (purified by silica gel chromatography using PE/EA 5:1-1:1).  $^1\text{H NMR}$  (600 MHz, Chloroform-*d*)  $\delta$  7.49 – 7.40 (m, 5H), 7.11 (dd,  $J = 13.2$ , 2.3 Hz, 2H), 4.13 (q,  $J = 7.2$  Hz, 2H), 3.77 (t,  $J = 7.5$  Hz, 2H), 3.69 (s, 2H), 2.95 (t,  $J = 7.5$  Hz, 2H), 1.96 (s, 3H), 1.22 (t,  $J = 7.2$  Hz, 3H);  $^{13}\text{C NMR}$  (150 MHz, Chloroform-*d*)  $\delta$  183.7, 170.7, 158.3, 140.9, 137.4, 134.6, 131.1, 130.7, 129.7, 129.1, 128.1, 126.6, 123.8, 61.0, 54.6, 39.4, 29.8, 27.0, 14.2; HRMS (ESI)  $m/z$ : calculated for  $\text{C}_{21}\text{H}_{22}\text{ClN}_2\text{O}_3$  (M+H) $^+$ : 385.1313, found: 385.1314.

**ethyl 2-(1-((acetylimino)(phenyl)methyl)-5-bromoindolin-7-yl)acetate (5ja)**

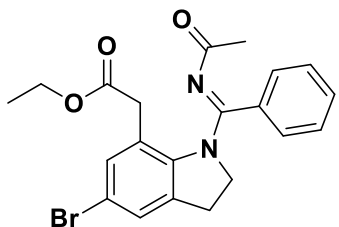

Following by general procedure for the synthesis of **5aa**. White

solid, 116.8 mg, yield: 68% (purified by silica gel chromatography using PE/EA 5:1-1:1).  $^1\text{H NMR}$  (500 MHz, Chloroform-*d*)  $\delta$  7.53 – 7.44 (m, 5H), 7.31 (d,  $J = 1.9$  Hz, 1H), 7.29 (s, 1H), 4.17 (q,  $J = 7.1$  Hz, 2H), 3.81 (t,  $J = 7.6$  Hz, 2H), 3.72 (s, 2H), 3.00 (t,  $J = 7.5$  Hz, 2H), 2.01 (s, 3H), 1.26 (t,  $J = 7.2$  Hz, 3H);  $^{13}\text{C NMR}$  (125 MHz, Chloroform-*d*)  $\delta$  183.7, 170.6, 158.2, 141.5, 137.7, 134.6, 132.6, 131.1, 129.1, 128.2, 127.1, 126.8, 118.4, 61.0, 54.5, 39.4, 29.7, 26.9, 14.2; HRMS (ESI)  $m/z$ : calculated for  $\text{C}_{21}\text{H}_{22}\text{BrN}_2\text{O}_3$  (M+H) $^+$ : 429.0808, found: 429.0796.

**ethyl 2-(1-((acetylimino)(phenyl)methyl)-6-chloroindolin-7-yl)acetate (5ka)**

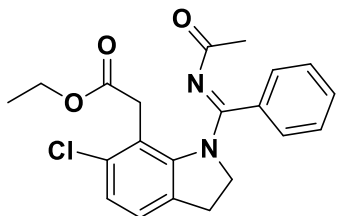

Following by general procedure for the synthesis of **5aa**.

Yellow solid, 55.4 mg, yield: 36% (purified by silica gel chromatography using PE/EA 5:1-

1:1). **<sup>1</sup>H NMR (500 MHz, Chloroform-*d*)**  $\delta$  7.51 – 7.42 (m, 5H), 7.20 (d, *J* = 8.0 Hz, 1H), 7.10 (d, *J* = 8.0 Hz, 1H), 4.15 (q, *J* = 7.1 Hz, 2H), 3.88 (s, 2H), 3.80 (t, *J* = 7.5 Hz, 2H), 2.95 (t, *J* = 7.5 Hz, 2H), 1.98 (s, 3H), 1.23 (t, *J* = 7.1 Hz, 3H); **<sup>13</sup>C NMR (125 MHz, Chloroform-*d*)**  $\delta$  183.7, 170.2, 158.4, 144.1, 134.6, 134.5, 134.3, 131.1, 129.1, 128.1, 126.7, 124.5, 124.2, 60.9, 55.0, 36.9, 29.7, 26.8, 14.1; **HRMS (ESI) m/z**: calculated for C<sub>21</sub>H<sub>22</sub>ClN<sub>2</sub>O<sub>3</sub> (M+H)<sup>+</sup>: 385.1313, found: 385.1310.

**ethyl 2-(1-((acetylimino)(phenyl)methyl)-5,6-difluoroindolin-7-yl)acetate (5na)**

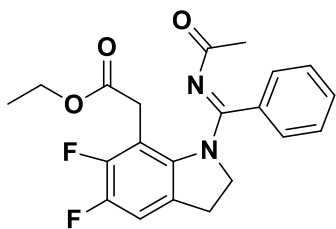

Following by general procedure for the synthesis of **5aa**. White solid, 111.3 mg, yield: 72% (purified by silica gel chromatography using PE/EA 5:1-1:1). **<sup>1</sup>H NMR (500 MHz, Chloroform-*d*)**  $\delta$  7.49 – 7.41 (m, 5H), 6.98 (dd, *J* = 9.0, 7.6 Hz, 1H), 4.14 (q, *J* = 7.2 Hz, 2H), 3.83 – 3.73 (m, 4H), 2.93 (t, *J* = 7.5 Hz, 2H), 1.96 (s, 3H), 1.22 (t, *J* = 7.1 Hz, 3H); **<sup>13</sup>C NMR (125 MHz, Chloroform-*d*)**  $\delta$  183.7, 169.7, 158.3, 148.7 (dd, *J* = 244.1, 13.4 Hz), 148.4 (dd, *J* = 245.1, 13.4 Hz), 138.5 (d, *J* = 5.3 Hz), 134.5, 131.2, 130.5 (dd, *J* = 6.9, 3.4 Hz), 129.1, 128.0, 116.2 (d, *J* = 16.2 Hz), 112.0 (d, *J* = 19.3 Hz), 61.1, 54.9, 33.0, 29.6, 26.8, 14.1; **HRMS (ESI) m/z**: calculated for C<sub>21</sub>H<sub>21</sub>F<sub>2</sub>N<sub>2</sub>O<sub>3</sub> (M+H)<sup>+</sup>: 387.1515, found: 387.1519.

**ethyl 2-(1'-((acetylimino)(phenyl)methyl)spiro[cyclopentane-1,3'-indolin]-7'-yl)acetate (5pa)**

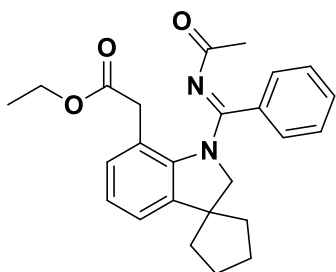

Following by general procedure for the synthesis of **5aa**. Yellow solid, 113.3 mg, yield: 70% (purified by silica gel chromatography using PE/EA 5:1-1:1). **<sup>1</sup>H NMR (500 MHz, Chloroform-*d*)**  $\delta$  7.50 – 7.42 (m, 5H), 7.17 – 7.08 (m, 3H), 4.14 (q, *J* = 7.1 Hz, 2H), 3.73 (s, 2H), 3.54 (s, 2H), 1.98 (s, 3H), 1.87 – 1.77 (m, 4H), 1.73 – 1.66 (m, 2H), 1.60 – 1.51 (m, 2H), 1.23 (t, *J* = 7.1 Hz, 3H); **<sup>13</sup>C NMR (125 MHz,**

**Chloroform-*d***)  $\delta$  183.7, 171.3, 158.7, 143.8, 141.6, 135.2, 130.8, 129.6, 129.1, 128.1, 126.2, 125.4, 120.9, 67.2, 60.7, 53.0, 39.4, 38.1, 27.0, 25.1, 14.2; **HRMS (ESI) *m/z***: calculated for  $C_{25}H_{29}N_2O_3$  ( $M+H$ )<sup>+</sup>: 405.2173, found: 405.2179.

**ethyl 2-(1-((acetylimino)(4-fluorophenyl)methyl)indolin-7-yl)acetate (5ra)**

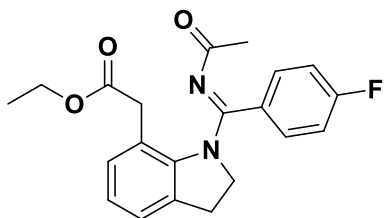

Following by general procedure for the synthesis of **5aa**.

Yellow oil, 84.0 mg, yield: 57% (purified by silica gel chromatography using PE/EA 5:1-1:1). **<sup>1</sup>H NMR (500 MHz, Chloroform-*d*)**  $\delta$  7.48 (dd,  $J = 8.1, 5.2$  Hz, 2H), 7.19 – 7.09 (m, 5H), 4.13 (q,  $J = 7.2$  Hz, 2H), 3.79 (t,  $J = 7.5$  Hz, 2H), 3.72 (s, 2H), 3.00 (t,  $J = 7.5$  Hz, 2H), 2.01 (s, 3H), 1.23 (t,  $J = 7.1$  Hz, 3H); **<sup>13</sup>C NMR (125 MHz, Chloroform-*d*)**  $\delta$  183.6, 171.2, 164.1 (d,  $J = 251.8$  Hz), 157.5, 141.9, 135.5, 131.1, 130.4 (d,  $J = 8.7$  Hz), 129.9, 125.9, 125.3, 123.7, 116.3 (d,  $J = 22.0$  Hz), 60.8, 54.5, 39.7, 29.9, 27.0, 14.2; **HRMS (ESI) *m/z***: calculated for  $C_{21}H_{22}FN_2O_3$  ( $M+H$ )<sup>+</sup>: 369.1609, found: 369.1604.

**ethyl 2-(1-((acetylimino)(3,5-dimethylphenyl)methyl)indolin-7-yl)acetate (5sa)**

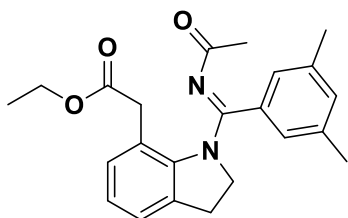

Following by general procedure for the synthesis of **5aa**.

Yellow solid, 98.4 mg, yield: 65% (purified by silica gel chromatography using PE/EA 5:1-1:1). **<sup>1</sup>H NMR (600 MHz, Chloroform-*d*)**  $\delta$  7.15 (dd,  $J = 7.3, 1.5$  Hz, 1H), 7.13 – 7.07 (m, 3H), 7.05 (d,  $J = 1.8$  Hz, 2H), 4.15 (q,  $J = 7.1$  Hz, 2H), 3.78 (t,  $J = 7.5$  Hz, 2H), 3.73 (s, 2H), 2.96 (t,  $J = 7.5$  Hz, 2H), 2.33 (s, 6H), 1.98 (s, 3H), 1.24 (t,  $J = 7.2$  Hz, 3H); **<sup>13</sup>C NMR (150 MHz, Chloroform-*d*)**  $\delta$  183.9, 171.4, 159.0, 142.1, 138.7, 135.5, 135.1, 132.6, 129.6, 125.8, 125.7, 125.4, 123.6, 60.7, 54.6, 39.6, 29.9, 27.0, 21.3, 14.2; **HRMS (ESI) *m/z***: calculated for  $C_{23}H_{27}N_2O_3$  ( $M+H$ )<sup>+</sup>: 379.2016, found: 379.2017.

**ethyl-2-(1-((acetylimino)(cyclopropyl)methyl)indolin-7-yl)acetate (5va)**

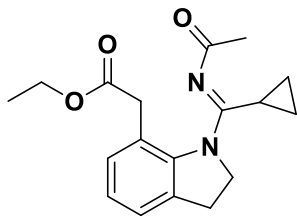

Following by general procedure for the synthesis of **5aa**. White solid, 20.1 mg, yield: 16% (purified by silica gel chromatography using PE/EA 2:1-1:1).

**<sup>1</sup>H NMR (500 MHz, Chloroform-*d*)**  $\delta$  7.15 – 7.11 (m, 1H), 7.04 – 6.98 (m, 2H), 4.48 – 4.41 (m, 1H), 4.16 – 4.09 (m, 1H), 4.05 – 3.98 (m, 1H), 3.90 – 3.81 (m, 1H), 3.69 (s, 1H), 3.14 – 3.04 (m, 1H), 2.89 – 2.81 (m, 1H), 1.83 – 1.77 (m, 1H), 1.68 (s, 3H), 1.30 – 1.20 (m, 1H), 1.10 (t,  $J = 7.1$  Hz, 3H), 1.05 – 1.00 (m, 1H), 0.89 – 0.84 (m, 1H), 0.77 – 0.71 (m, 1H), 0.61 – 0.55 (m, 1H). **<sup>13</sup>C NMR (125 MHz, Chloroform-*d*)**  $\delta$  173.4, 169.0, 157.7, 141.9, 135.3, 132.6, 127.1, 123.5, 122.7, 66.6, 58.5, 50.6, 29.0, 20.3, 14.1, 13.3, 8.4, 8.2. **HRMS (ESI) *m/z***: calculated for C<sub>18</sub>H<sub>23</sub>N<sub>2</sub>O<sub>3</sub> (M+H)<sup>+</sup>: 315.1703, found: 315.1701.

**ethyl 2-(1-(phenyl(propionylimino)methyl)indolin-7-yl)acetate (5ab)**

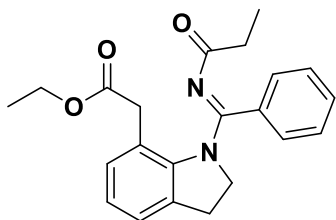

Following by general procedure for the synthesis of **5aa**. White solid, 103.5 mg, yield: 71% (purified by silica gel chromatography using PE/EA 5:1-1:1).

**<sup>1</sup>H NMR (600 MHz, Chloroform-*d*)**  $\delta$  7.55 – 7.35 (m, 5H), 7.20 – 7.01 (m, 3H), 4.14 (q,  $J = 7.0$  Hz, 2H), 3.83 – 3.69 (m, 4H), 2.98 (q,  $J = 10.8, 9.0$  Hz, 2H), 2.23 (q,  $J = 7.5$  Hz, 2H), 1.23 (t,  $J = 7.0$  Hz, 3H), 0.94 (t,  $J = 7.3$  Hz, 3H); **<sup>13</sup>C NMR (150 MHz, Chloroform-*d*)**  $\delta$  186.8, 170.9, 157.6, 141.7, 135.1, 134.8, 130.4, 129.2, 128.5, 127.7, 125.2, 124.9, 123.2, 60.3, 54.0, 39.3, 32.4, 29.4, 13.8, 8.7; **HRMS (ESI) *m/z***: calculated for C<sub>22</sub>H<sub>25</sub>N<sub>2</sub>O<sub>3</sub> (M+H)<sup>+</sup>: 365.186, found: 365.1859.

**ethyl 2-(1-((benzoylimino)(phenyl)methyl)indolin-7-yl)acetate (5ac)**

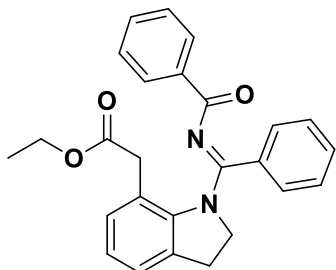

Following by general procedure for the synthesis of **5aa**. White

solid, 82.5 mg, yield: 50% (purified by silica gel chromatography using PE/EA 5:1-1:1). **<sup>1</sup>H NMR (500 MHz, Chloroform-*d*)**  $\delta$  7.98 (d,  $J$  = 7.6 Hz, 2H), 7.48 – 7.34 (m, 8H), 7.23 (dd,  $J$  = 6.5, 2.1 Hz, 1H), 7.18 – 7.13 (m, 2H), 3.98 – 3.89 (m, 4H), 3.72 (s, 2H), 3.06 (t,  $J$  = 7.5 Hz, 2H), 1.16 (t,  $J$  = 7.1 Hz, 3H); **<sup>13</sup>C NMR (125 MHz, Chloroform-*d*)**  $\delta$  177.0, 171.3, 161.8, 142.0, 136.1, 135.4, 134.6, 131.9, 130.8, 130.0, 129.6, 128.8, 128.3, 128.0, 125.9, 125.8, 123.6, 60.7, 54.7, 39.4, 29.9, 14.1; **HRMS (ESI)  $m/z$** : calculated for C<sub>26</sub>H<sub>25</sub>N<sub>2</sub>O<sub>3</sub> (M+H)<sup>+</sup>: 413.186, found: 413.1856.

**butyl 2-(1-((acetylimino)(phenyl)methyl)indolin-7-yl)acetate (5ad)**

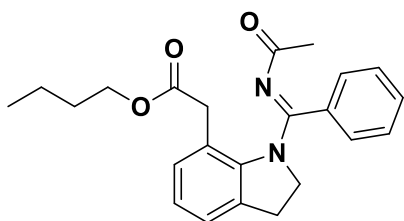

Following by general procedure for the synthesis of **5aa**.

Yellow oil, 112.0 mg, yield: 74% (purified by silica gel chromatography using PE/EA 5:1-1:1). **<sup>1</sup>H NMR (500 MHz, Chloroform-*d*)**  $\delta$  7.50 – 7.40 (m, 5H), 7.15 (dd,  $J$  = 5.9, 2.8 Hz, 1H), 7.11 – 7.06 (m, 2H), 4.07 (t,  $J$  = 6.8 Hz, 2H), 3.82 – 3.70 (m, 4H), 2.97 (t,  $J$  = 7.5 Hz, 2H), 1.97 (s, 3H), 1.60 – 1.54 (m, 2H), 1.36 – 1.28 (m, 2H), 0.88 (t,  $J$  = 7.4 Hz, 3H); **<sup>13</sup>C NMR (125 MHz, Chloroform-*d*)**  $\delta$  183.7, 171.3, 158.4, 142.1, 135.5, 135.1, 130.9, 129.8, 129.0, 128.2, 125.7, 125.5, 123.6, 64.7, 54.5, 39.7, 30.6, 29.9, 27.0, 19.1, 13.7; **HRMS (ESI)  $m/z$** : calculated for C<sub>23</sub>H<sub>27</sub>N<sub>2</sub>O<sub>3</sub> (M+H)<sup>+</sup>: 379.2016, found: 379.2016.

**isobutyl 2-(1-((acetylimino)(phenyl)methyl)indolin-7-yl)acetate (5ae)**

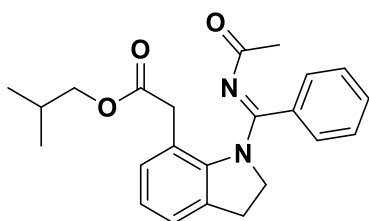

Following by general procedure for the synthesis of **5aa**.

Yellow oil, 93.9 mg, yield: 62% (purified by silica gel chromatography using PE/EA 5:1-1:1). **<sup>1</sup>H NMR (600 MHz, Chloroform-*d*)**  $\delta$  7.49 – 7.40 (m, 5H), 7.15 (dd,  $J$  = 6.2, 2.6 Hz, 1H), 7.12 – 7.06 (m, 2H), 3.85 (d,  $J$  = 6.7 Hz, 2H), 3.81 – 3.71 (m, 4H), 2.97 (t,  $J$  = 7.5 Hz, 2H), 1.97 (s, 3H), 1.92 – 1.85 (m, 1H), 0.87 (d,  $J$  = 6.8 Hz, 6H); **<sup>13</sup>C NMR (150 MHz, Chloroform-*d*)**  $\delta$  183.9, 171.4, 158.5, 142.0, 135.6, 135.0, 131.0, 129.8, 129.1, 128.2, 125.8, 125.5, 123.7, 70.9, 54.6, 39.6, 29.9, 27.7, 27.0, 19.1; **HRMS (ESI)  $m/z$** : calculated



for  $C_{23}H_{27}N_2O_3$  ( $M+H$ )<sup>+</sup>: 379.2016, found: 379.2012.

### benzyl 2-(1-((acetylimino)(phenyl)methyl)indolin-7-yl)acetate (**5af**)

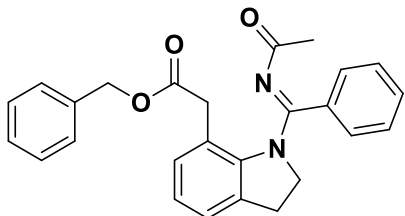

Following by general procedure for the synthesis of **5aa**.

Yellow solid, 107.2 mg, yield: 65% (purified by silica gel chromatography using PE/EA 5:1-1:1). <sup>1</sup>H NMR (600 MHz, Chloroform-*d*)  $\delta$  7.49 – 7.38 (m, 5H), 7.35 – 7.28 (m, 5H), 7.18 (t,  $J$  = 4.4 Hz, 1H), 7.11 (d,  $J$  = 3.7 Hz, 2H), 5.12 (s, 2H), 3.83 (s, 2H), 3.73 (t,  $J$  = 7.5 Hz, 2H), 2.98 (t,  $J$  = 7.5 Hz, 2H), 1.96 (s, 3H); <sup>13</sup>C NMR (150 MHz, Chloroform-*d*)  $\delta$  183.9, 171.1, 158.4, 142.0, 136.0, 135.6, 135.0, 130.9, 129.9, 129.0, 128.5, 128.4, 128.2, 125.8, 125.2, 123.8, 66.6, 54.5, 39.8, 29.9, 27.0; HRMS (ESI)  $m/z$ : calculated for  $C_{26}H_{25}N_2O_3$  ( $M+H$ )<sup>+</sup>: 413.186, found: 413.1858.

## VII. Gram-scale Preparation and Conversion of the Product

(a) Gram-scale preparation of product

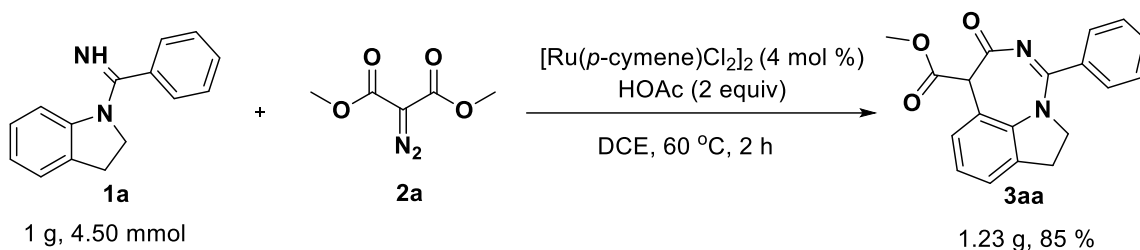

A pressure tube was charged with  $[Ru(p\text{-cymene})Cl_2]_2$  (110.2 mg, 4 mol %), HOAc (540.5 mg, 9 mmol), **1a** (1 g, 4.5 mmol), **2a** (1.07 g, 6.75 mmol) and DCE (50 mL). The reaction mixture was stirred at 60 °C for 2 h. After that, the solvent was removed under reduced pressure and the residue was purified by silica gel chromatography using PE/EA = 2:1 to afford the product **3aa** (1.23 g, yield: 85%).

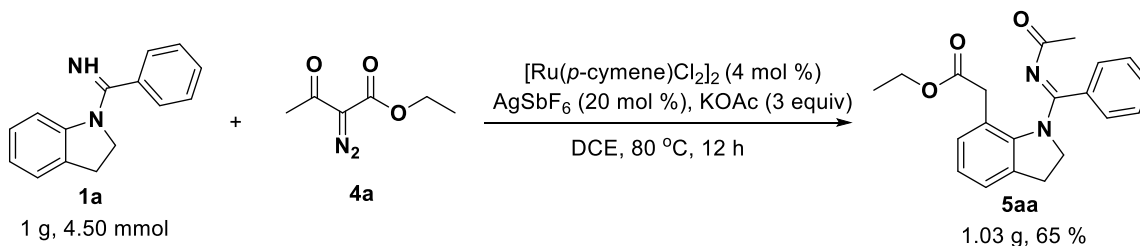

A pressure tube was charged with [Ru(*p*-cymene)Cl<sub>2</sub>]<sub>2</sub> (110.2 mg, 4 mol %), AgSbF<sub>6</sub> (309.3 mg, 20 mol %), KOAc (1.32 g, 13.5 mmol), **1a** (1 g, 4.5 mmol), **4a** (1.05 g, 6.75 mmol) and DCE (50 mL). The reaction mixture was stirred at 80 °C for 12 h. After that, the solvent was removed under reduced pressure and the residue was purified by silica gel chromatography using PE/EA = 3:1 to afford the product **5aa** (1.03 g, yield: 65%).

(b) Transformations of product

(1) Transformations of **3aa** to **6**<sup>8</sup>

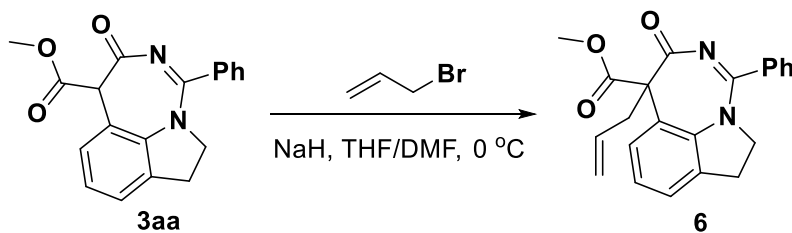

Dissolved **3aa** (50 mg, 0.16 mmol) with THF (10 mL) and DMF (2 mL) in a three-necked flask, added NaH (37.5 mg, 0.94 mmol) under argon protection, and stirred for 10 minutes at 0 °C. Then, allyl bromide (56.7 mg, 0.47 mmol) was added and stirred for 4 h at room temperature. After the reaction was completed, added methanol to the system for quenching, and the solvent was removed under reduced pressure, then extracted with DCM (30 mL×3). The organic layer was then dried with Na<sub>2</sub>SO<sub>4</sub> and concentrated by rotary evaporation to give the crude product. The crude product was purified by silica gel column chromatography to give **6** (20 mg, yield: 36%). <sup>1</sup>H NMR (500 MHz, DMSO-*d*<sub>6</sub>) δ 7.59 – 7.51 (m, 5H), 7.44 – 7.38 (m, 3H), 5.92 – 5.81 (m, 1H), 5.25 (dd, *J* = 17.1, 1.9 Hz, 1H), 5.12 (dd, *J* = 10.3, 2.0 Hz, 1H), 4.31 (q, *J* = 10.1 Hz, 1H), 4.00 – 3.92 (m, 1H), 3.41 (s, 3H), 3.31 – 3.21 (m, 2H), 3.21 – 3.13 (m, 1H), 3.09 (ddd, *J* = 16.1, 9.5, 2.2 Hz, 1H); <sup>13</sup>C NMR (125 MHz, DMSO-*d*<sub>6</sub>) δ 169.2, 162.9, 151.8, 139.7, 135.8, 135.1, 133.5, 130.6, 128.5, 127.9, 127.5, 124.5, 124.1, 121.6, 118.6, 64.7, 54.9, 52.2, 36.3, 27.9; HRMS (ESI) *m/z*: calculated for C<sub>22</sub>H<sub>21</sub>N<sub>2</sub>O<sub>3</sub> (M+H)<sup>+</sup>: 361.1547, found: 361.1543.

(2) Transformations of **3aa** to **7**<sup>8</sup>

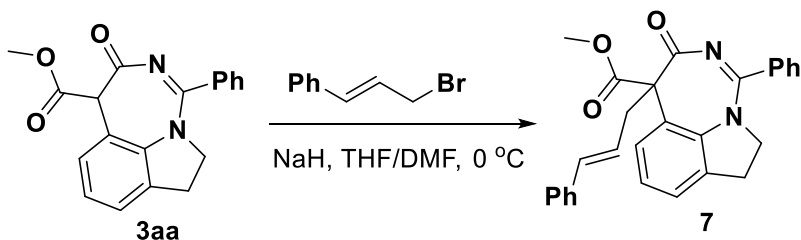

Dissolved **3aa** (80 mg, 0.25 mmol) with THF (15 mL) and DMF (3 mL) in a three-necked flask, added NaH (60 mg, 1.5 mmol) under argon protection, and stirred for 10 minutes at 0 °C. Then, (*E*)-3-bromo-1-phenyl-1-propene (147.8 mg, 0.75 mmol) was added and stirred for 4 h at room temperature. After the reaction was completed, added methanol to the system for quenching, and the solvent was removed under reduced pressure, then extracted with DCM (40 mL×3). The organic layer was then dried with Na<sub>2</sub>SO<sub>4</sub> and concentrated by rotary evaporation to give the crude product. The crude product was purified by silica gel column chromatography to give **7** (35 mg, yield: 32%). <sup>1</sup>H NMR (500 MHz, DMSO-*d*<sub>6</sub>) δ 7.59 – 7.49 (m, 6H), 7.47 – 7.42 (m, 2H), 7.37 – 7.32 (m, 2H), 7.31 – 7.27 (m, 2H), 7.23 – 7.19 (m, 1H), 6.62 (d, *J* = 15.8 Hz, 1H), 6.29 (dt, *J* = 15.6, 7.2 Hz, 1H), 4.31 (q, *J* = 10.1 Hz, 1H), 4.00 – 3.92 (m, 1H), 3.40 (s, 3H), 3.39 – 3.33 (m, 2H), 3.31 – 3.25 (m, 1H), 3.10 (ddd, *J* = 16.2, 9.5, 2.2 Hz, 1H); <sup>13</sup>C NMR (125 MHz, DMSO-*d*<sub>6</sub>) δ 169.3, 163.0, 152.0, 139.6, 136.8, 135.8, 135.1, 133.0, 130.6, 128.6, 128.5, 127.9, 127.7, 127.4, 125.9, 125.0, 124.5, 124.2, 121.8, 65.1, 54.9, 52.3, 35.5, 27.9; HRMS (ESI) *m/z*: calculated for C<sub>28</sub>H<sub>25</sub>N<sub>2</sub>O<sub>3</sub> (M+H)<sup>+</sup>: 437.186, found: 437.1859.

### VIII. Mechanistic Studies

(a) H/D exchange

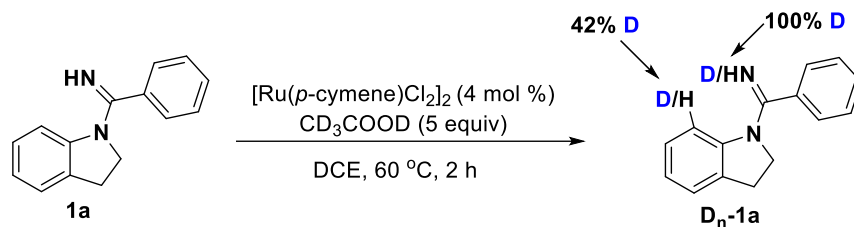

A pressure tube was charged with [Ru(*p*-cymene)Cl<sub>2</sub>]<sub>2</sub> (9.8 mg, 4 mol %), CD<sub>3</sub>COOD (128.2 mg, 2 mmol), **1a** (88.9 mg, 0.4 mmol) and DCE (4 mL). The reaction mixture was stirred at 60 °C for 2 h. After that, the solvent was removed under reduced pressure and the residue was purified by silica gel chromatography to afford the product **D<sub>n</sub>-1a**.

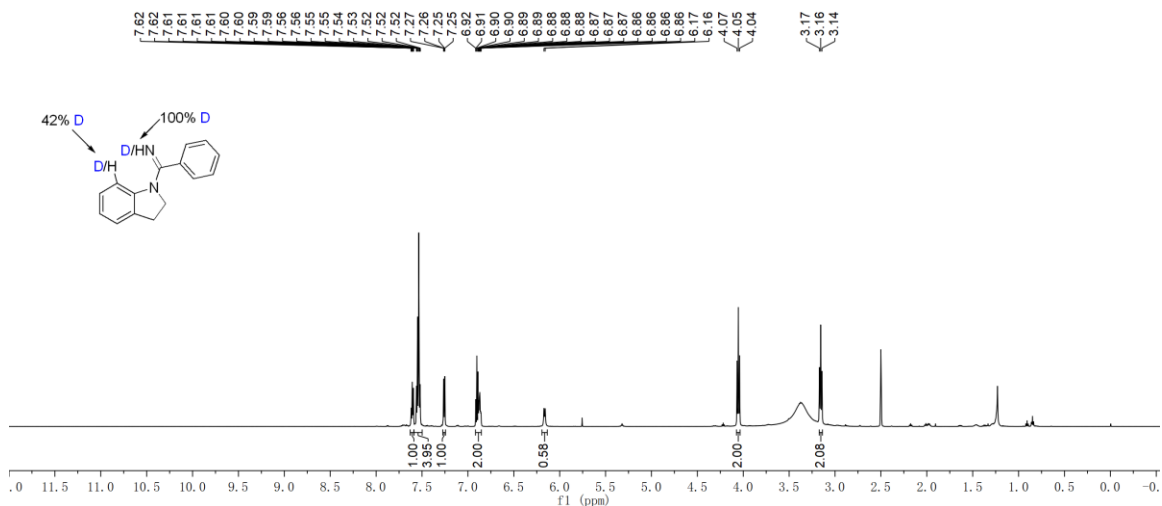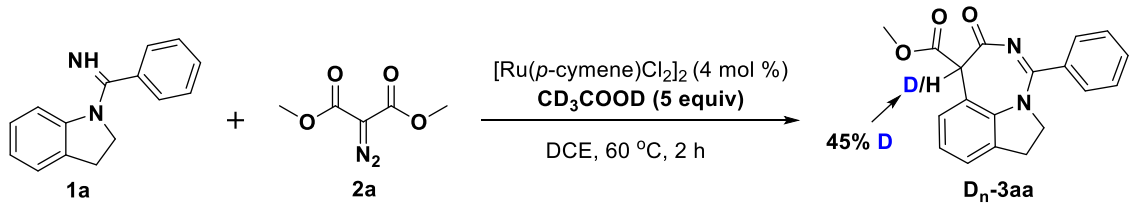

A pressure tube was charged with  $[\text{Ru}(p\text{-cymene})\text{Cl}_2]_2$  (9.8 mg, 4 mol %),  $\text{CD}_3\text{COOD}$  (128.2 mg, 2 mmol), **1a** (88.9 mg, 0.4 mmol), **2a** (94.9 mg, 0.6 mmol) and DCE (4 mL). The reaction mixture was stirred at 60 °C for 2 h. After that, the solvent was removed under reduced pressure and the residue was purified by silica gel chromatography to afford the product **D<sub>n</sub>-3aa**.

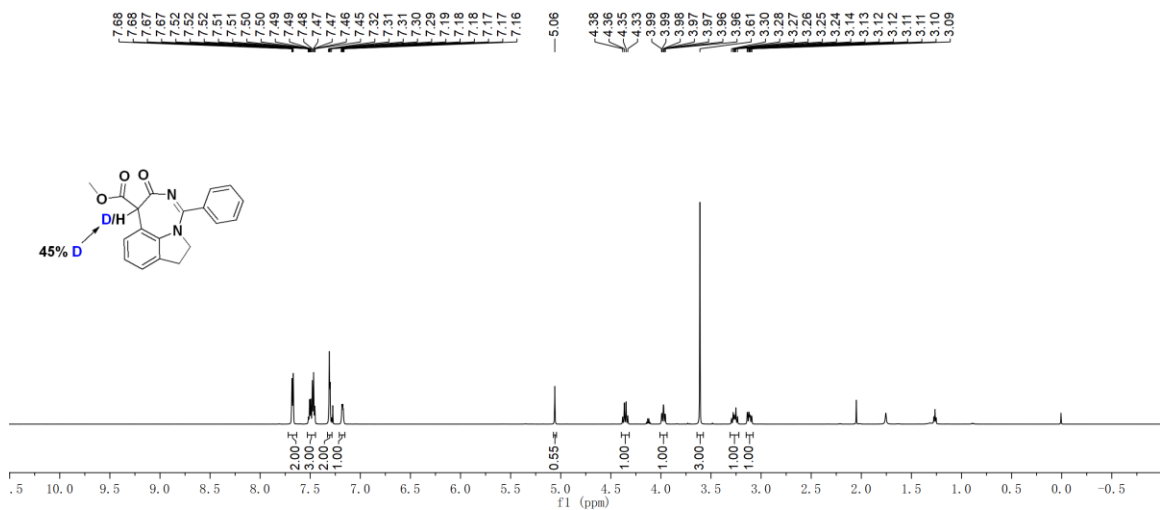

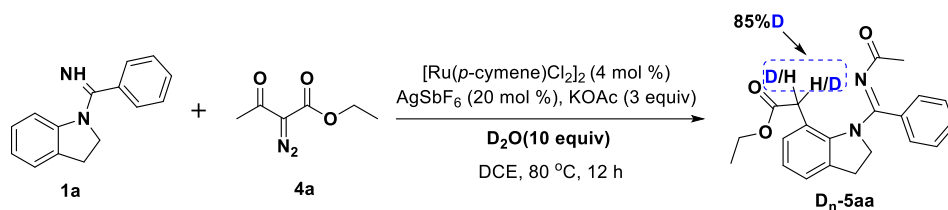

A pressure tube was charged with  $[Ru(p\text{-cymene})Cl_2]_2$  (9.8 mg, 4 mol %),  $AgSbF_6$  (27.5 mg, 20 mol %), KOAc (117.8 mg, 1.2 mmol), **1a** (88.9 mg, 0.4 mmol), **4a** (93.7 mg, 0.6 mmol),  $D_2O$  (80.1 mg, 4 mmol) and DCE (4 mL). The reaction mixture was stirred at 80 °C for 12 h. After that, the solvent was removed under reduced pressure and the residue was purified by silica gel chromatography to afford the product **D<sub>n</sub>-5aa**.

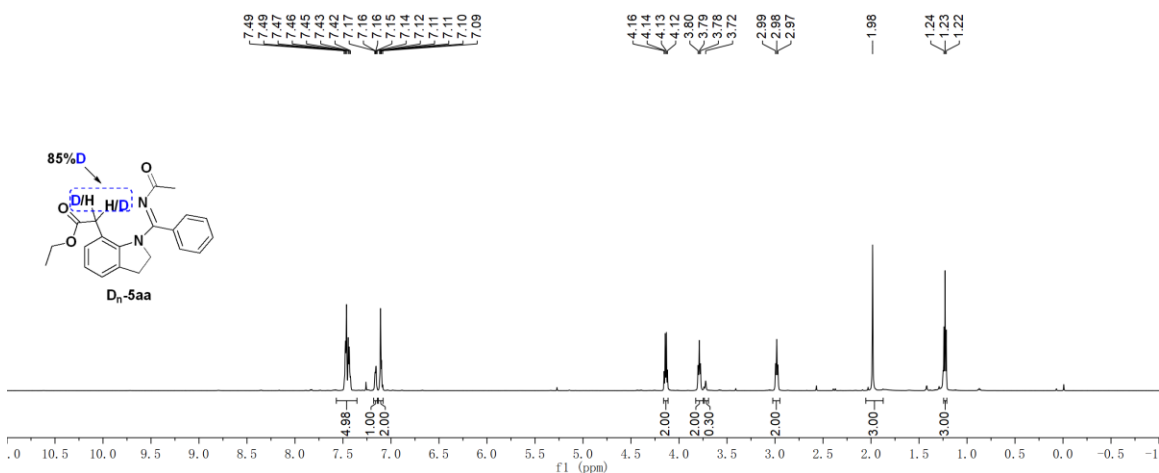

### (b) Competition experiment

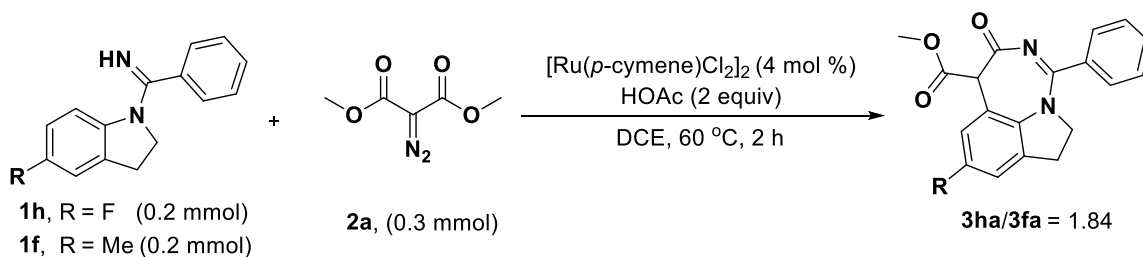

A pressure tube was charged with an equimolar mixture of **1h** (48.1 mg, 0.2 mmol) and **1f** (47.3 mg, 0.2 mmol) were allowed to react with **2a** (47.4 mg, 0.3 mmol) in DCE (4 mL) in the presence of  $[Ru(p\text{-cymene})Cl_2]_2$  (4.9 mg, 4 mol %), HOAc (24 mg, 0.4 mmol). The reaction mixture was stirred at 60 °C for 2 h. After that, the solvent was removed under

reduced pressure and the residue was purified by silica gel chromatography using PE/EA = 2:1 to afford the crude mixed products. The mixture of products **3ha** and **3fa** was determined to be 1.84/1 by  $^1\text{H}$  NMR spectra (see as below).

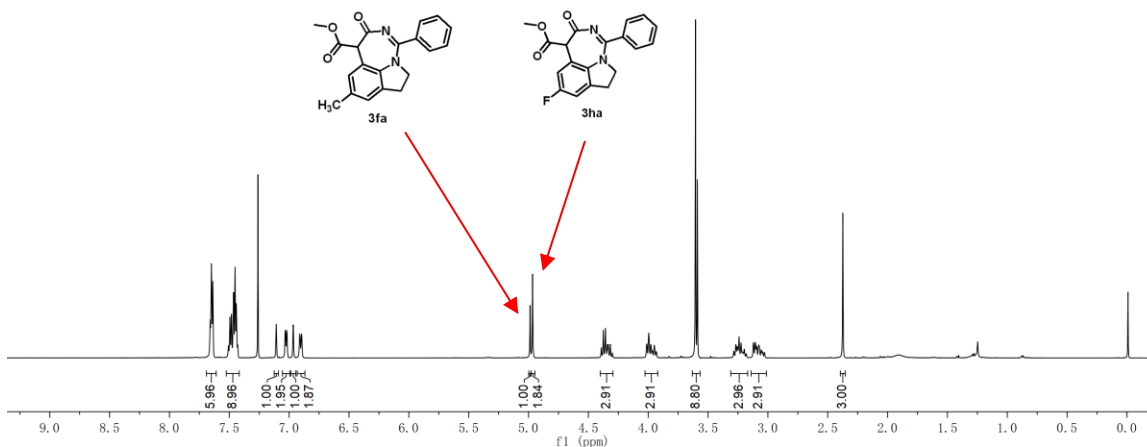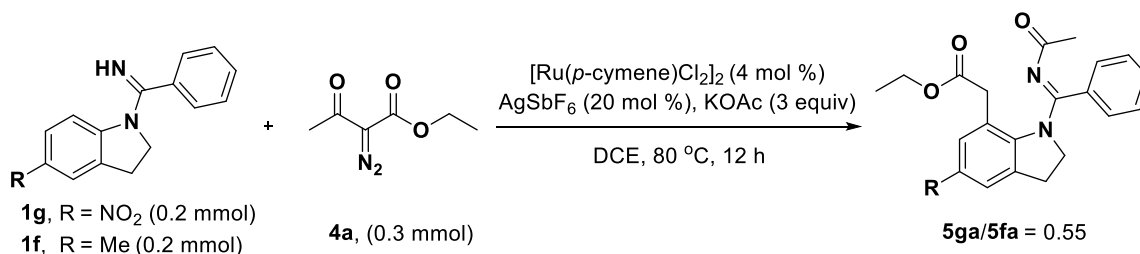

A pressure tube was charged with an equimolar mixture of **1g** (53.5 mg, 0.2 mmol) and **1f** (47.3 mg, 0.2 mmol) were allowed to react with **4a** (46.8 mg, 0.3 mmol) in DCE (4 mL) in the presence of  $[\text{Ru}(p\text{-cymene})\text{Cl}_2]_2$  (4.9 mg, 4 mol %),  $\text{AgSbF}_6$  (13.7 mg, 20 mol %), KOAc (58.9 mg, 0.6 mmol). The reaction mixture was stirred at 80 °C for 12 h. After that, the solvent was removed under reduced pressure and the residue was purified by silica gel chromatography using PE/EA = 3:1 to afford the crude mixed products. The mixture of products **5ga** and **5fa** was determined to be 0.55/1 by  $^1\text{H}$  NMR spectra (see as below).

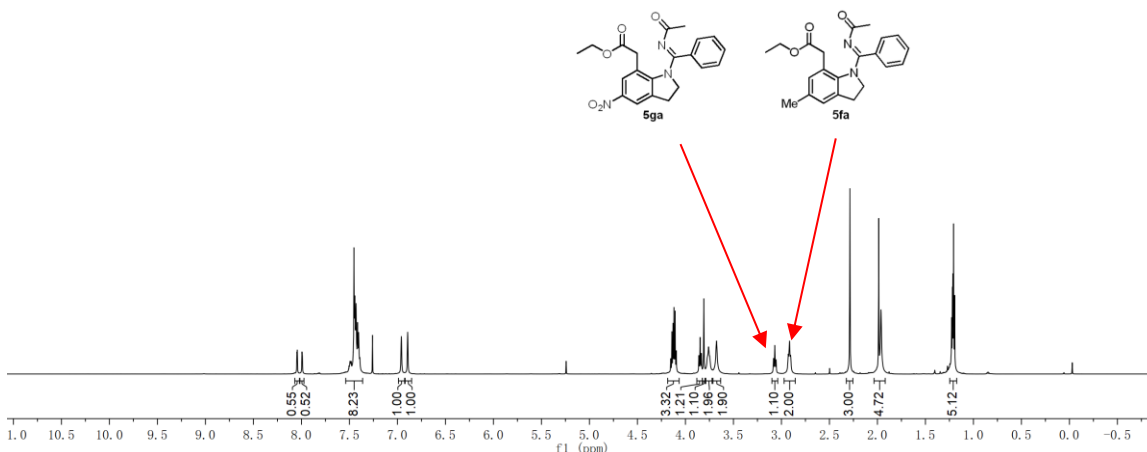

## IX. X-ray Crystallographic Data

### (a) The Single Crystal Structure of **3aa**

**X-ray Single Crystal Structure Analysis of **3aa**:** X-ray crystallographic data of **3aa** were solutions at  $T = 170.0$  K,  $C_{19}H_{16}N_2O_3$ ,  $M_r = 320.34$ , triclinic, space group: P-1,  $a = 8.9991(5)$  Å,  $b = 9.6163(5)$  Å,  $c = 10.1420(6)$  Å,  $\alpha = 75.919(2)^\circ$ ,  $\beta = 78.998(2)^\circ$ ,  $\gamma = 69.344(2)^\circ$ ,  $V = 791.22(8)$  Å<sup>3</sup>,  $Z = 2$ . Displacement ellipsoids are drawn at the 50% probability level.

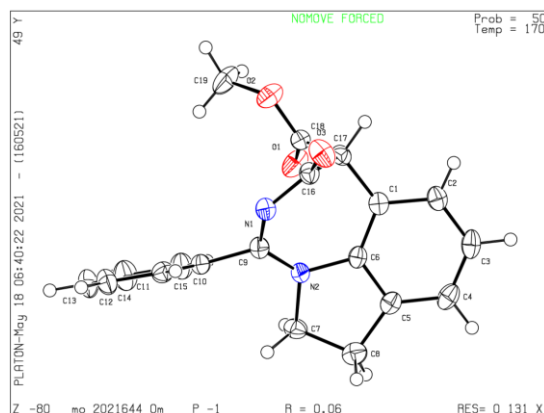

### (b) The Single Crystal Structure of **5sa**

**X-ray Single Crystal Structure Analysis of **5sa**:** X-ray crystallographic data of **5sa** were solutions at  $T = 298$  K,  $C_{23}H_{26}N_2O_3$ ,  $M_r = 378.46$ , triclinic, space group: P-1,  $a = 8.6896(13)$  Å,  $b = 8.6893(12)$  Å,  $c = 14.548(2)$  Å,  $\alpha = 94.344(5)^\circ$ ,  $\beta = 100.076(4)^\circ$ ,  $\gamma = 96.441(4)^\circ$ ,  $V = 1069.6(3)$  Å<sup>3</sup>,  $Z = 2$ . Displacement ellipsoids are drawn at the 50% probability level.

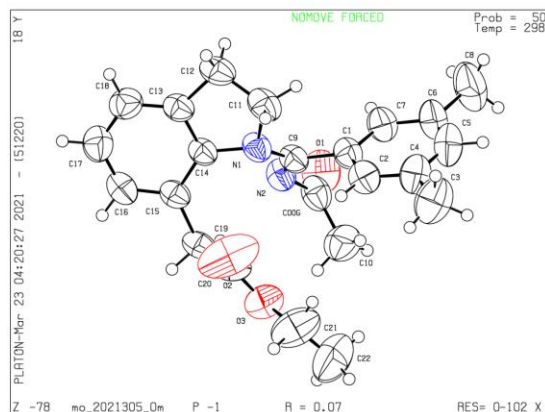

## X. References

1. J. Zhou, J. Li, Y. Li, C. Wu, G. He, Q. Yang, Y. Zhou and H. Liu, Direct Synthesis of 3-Acylindoles through Rhodium(III)-Catalyzed Annulation of N-Phenylamidines with  $\alpha$ -Cl Ketones, *Org. Lett.*, 2018, **20**, 7645.
2. P. A. Koutentis and S. I. Mirallai, *Tetrahedron*, 2010, **66**, 5134.
3. N. Jha, R. P. Singh, P. Saxena and M. Kapur, Iridium(III)-Catalyzed C(3)-H Alkylation of Isoquinolines via Metal Carbene Migratory Insertion, *Org. Lett.*, 2021, **23**, 8694.
4. R. B. Dateer and S. Chang, Rh(III)-Catalyzed C-H Cyclization of Arylnitrones with Diazo Compounds: Access to N-Hydroxyindolines, *Org. Lett.*, 2016, **18**, 68.
5. X. Chen, Y. Xie, X. Xiao, G. Li, Y. Deng, H. Jiang and W. Zeng, Rh(iii)-catalyzed chelation-assisted intermolecular carbenoid functionalization of  $\alpha$ -imino Csp<sup>3</sup>-H bonds, *Chem. Commun.*, 2015, **51**, 15328.
6. M. Regitz, J. Hocker and A. Liedhegener, Synthesis of Diazoacetic Esters and Amides from Corresponding Acetoacetic Acid Derivatives, *Org. Prep. Proced.*, 1969, **1**, 99.
7. L. Egger, L. Guénée, T. Bürgi and J. Lacour, Regioselective and Enantiospecific Synthesis of Dioxepines by (Cyclopentadienyl)ruthenium-Catalyzed Condensations of Diazocarbonyls and Oxetanes, *Adv. Synth. Catal.*, 2017, **359**, 2918.
8. X. Wei, X. Liang, Y. Li, Q. Liu, X. Liu, Y. Zhou and H. Liu, I<sub>2</sub>-induced cascade cyclization and dearomatization of indoles for the highly efficient synthesis of iodinated and vinylic spiroindolenines, *Green Chem.*, 2021, **23**, 9165.



## XI. NMR Spectra and HR-MS Spectra of Substrates and Products

### (a) $^1\text{H}$ NMR and $^{13}\text{C}$ NMR Spectra

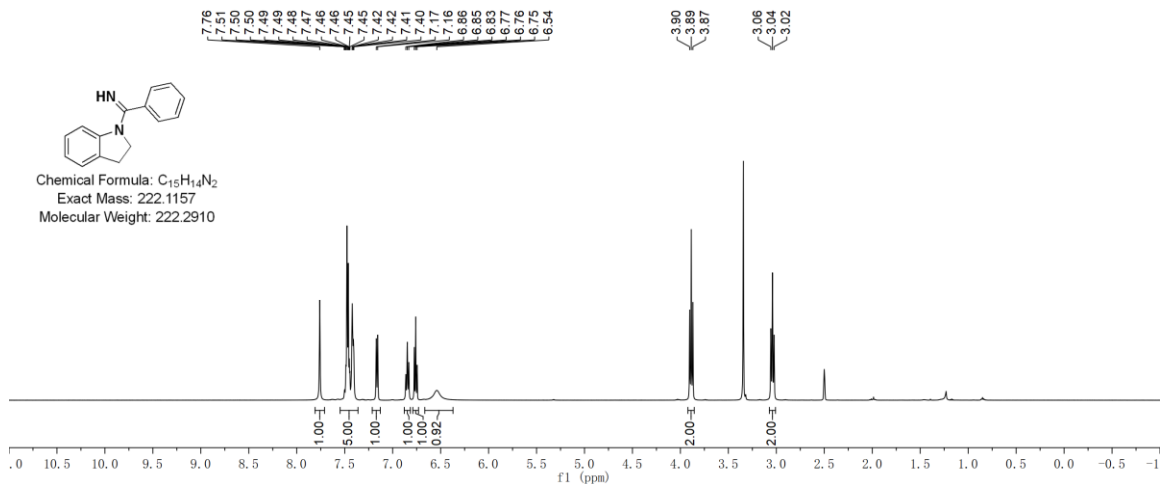

$^1\text{H}$  NMR spectrum of **1a** (500 MHz,  $\text{DMSO-}d_6$ )

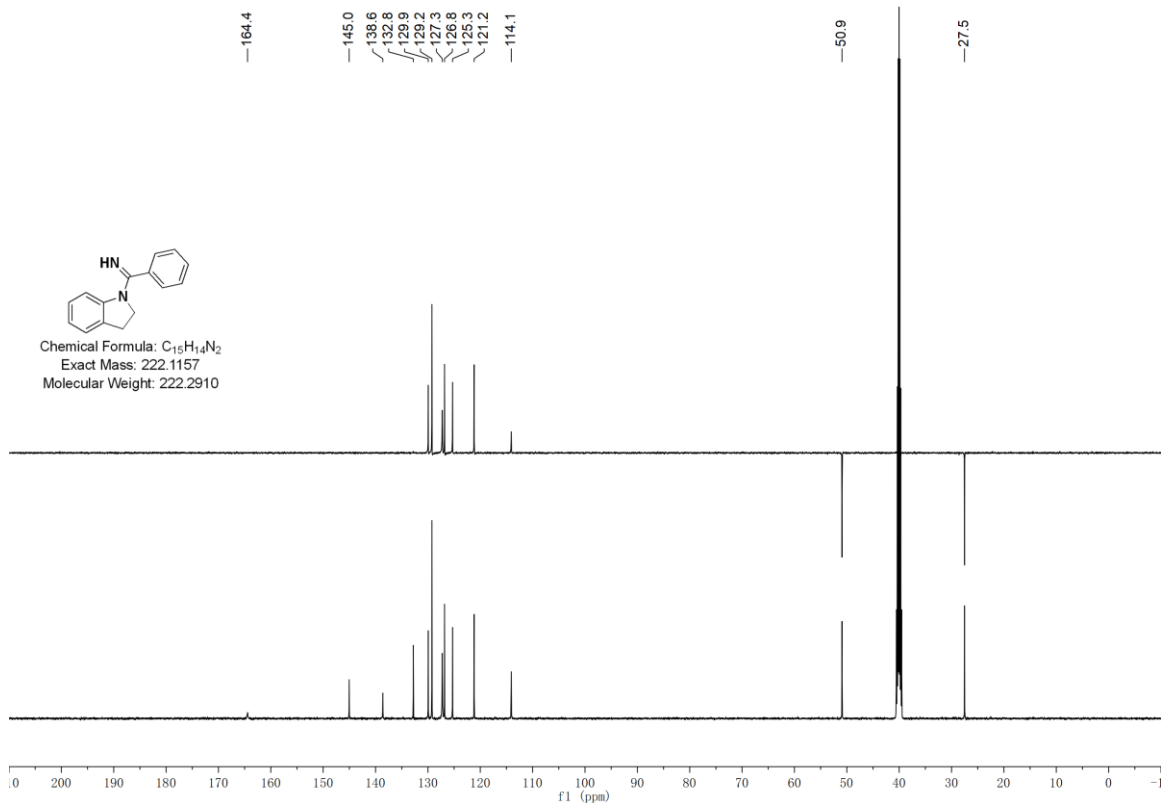

$^{13}\text{C}$  NMR spectrum of **1a** (125 MHz,  $\text{DMSO-}d_6$ )

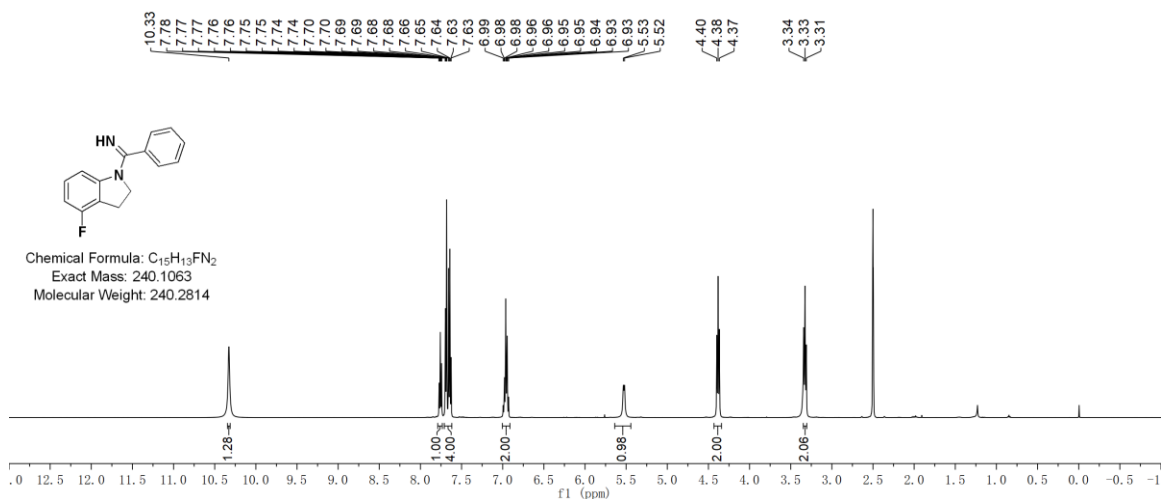

<sup>1</sup>H NMR spectrum of **1b** (500 MHz, DMSO-*d*<sub>6</sub>)

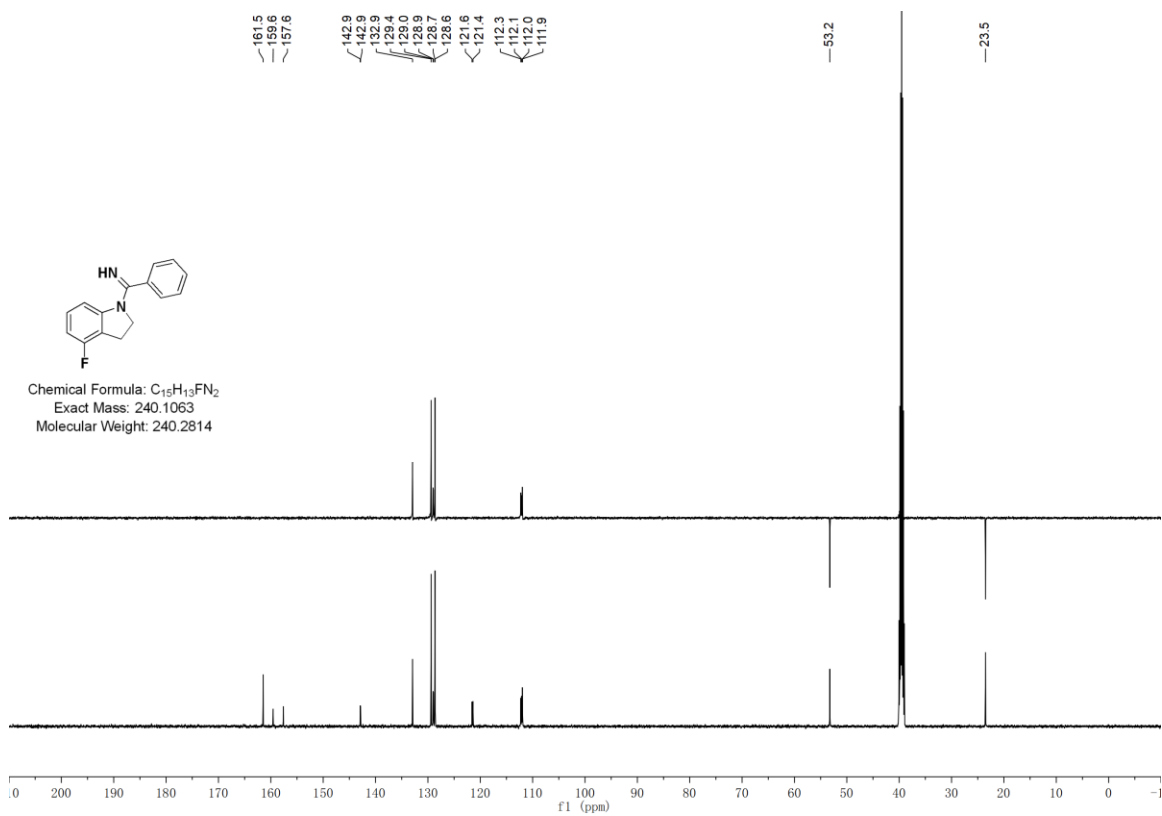

<sup>13</sup>C NMR spectrum of **1b** (125 MHz, DMSO-*d*<sub>6</sub>)

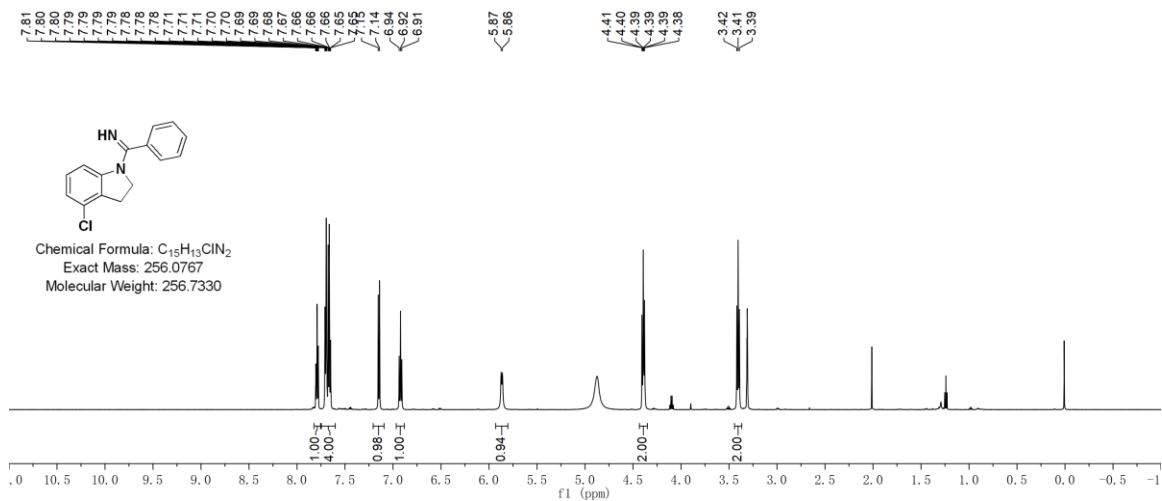

$^1H$  NMR spectrum of **1c** (600 MHz, Methanol- $d_4$ )

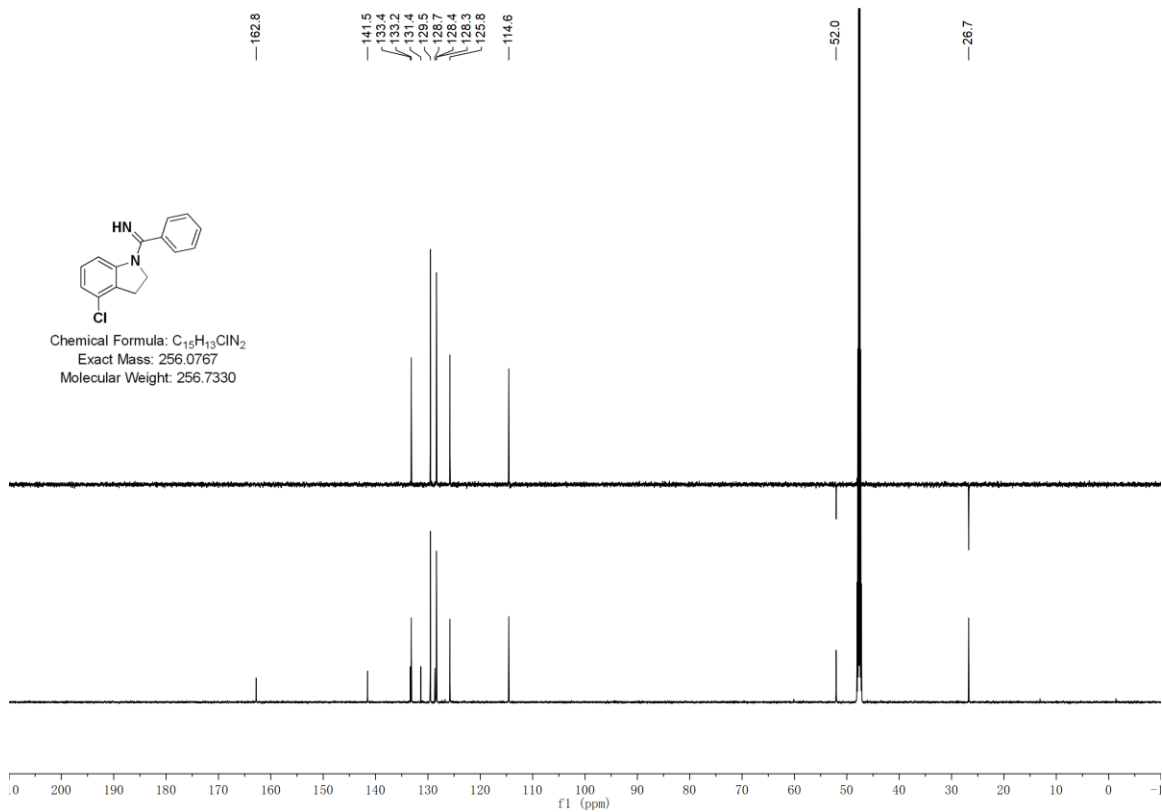

$^{13}C$  NMR spectrum of **1c** (150 MHz, Methanol- $d_4$ )

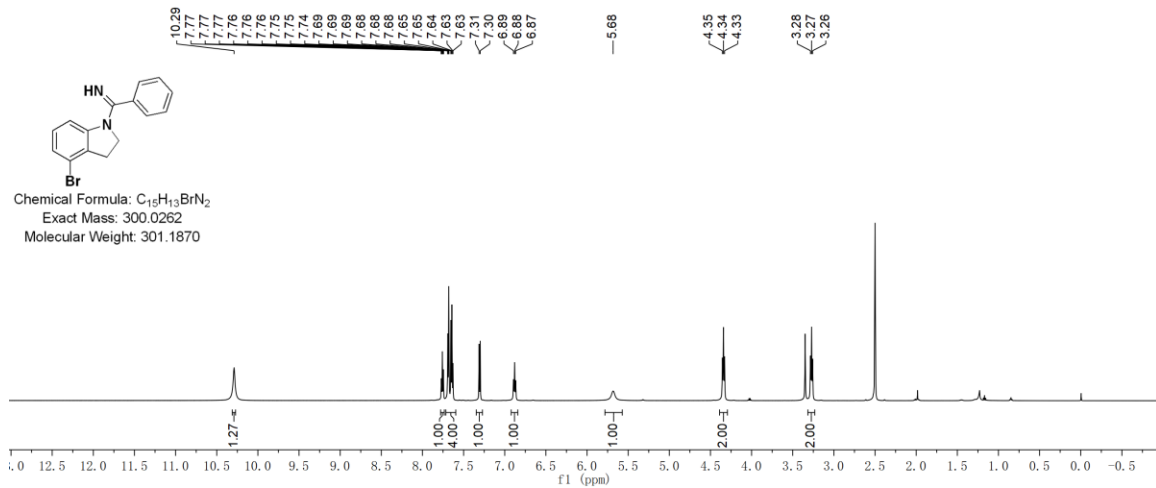

$^1H$  NMR spectrum of **1d** (600 MHz,  $DMSO-d_6$ )

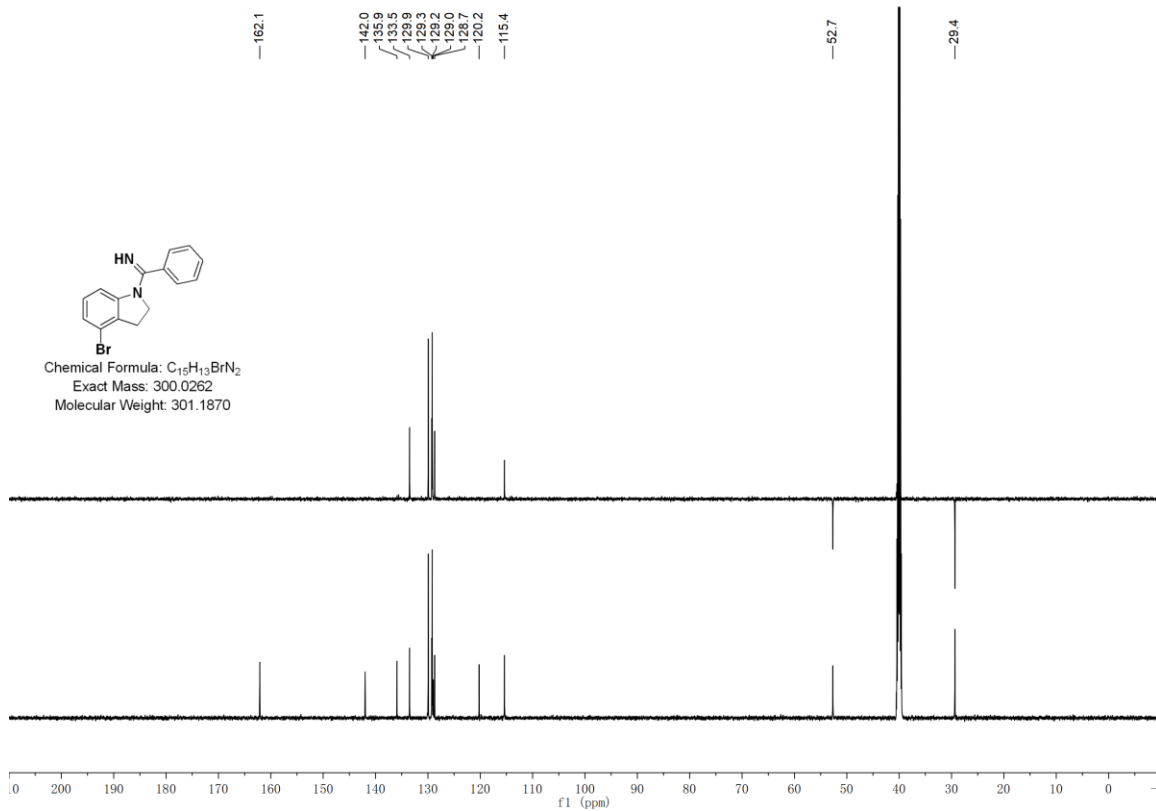

$^{13}C$  NMR spectrum of **1d** (150 MHz,  $DMSO-d_6$ )

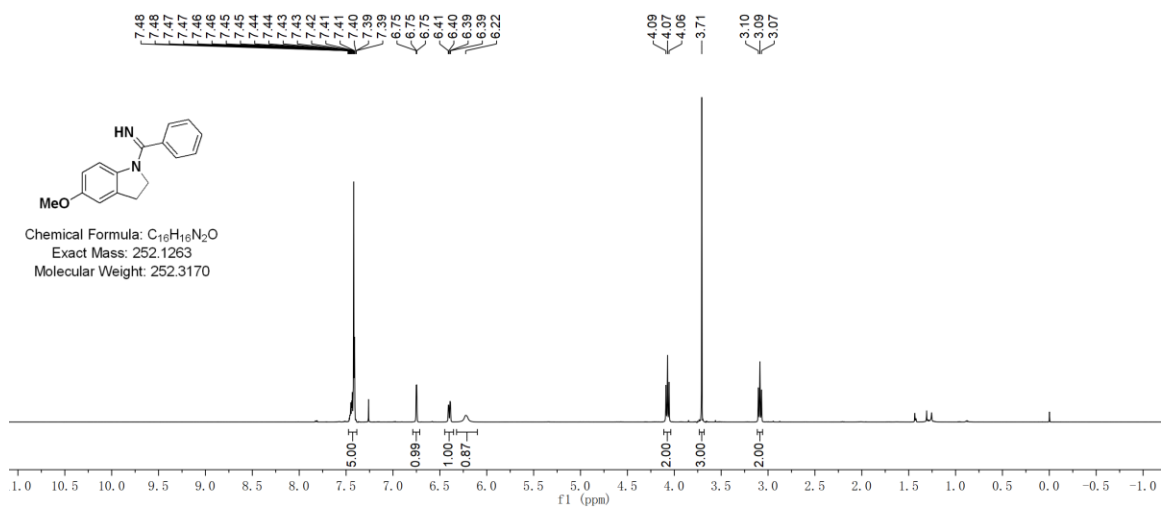

<sup>1</sup>H NMR spectrum of **1e** (500 MHz, Chloroform-*d*)

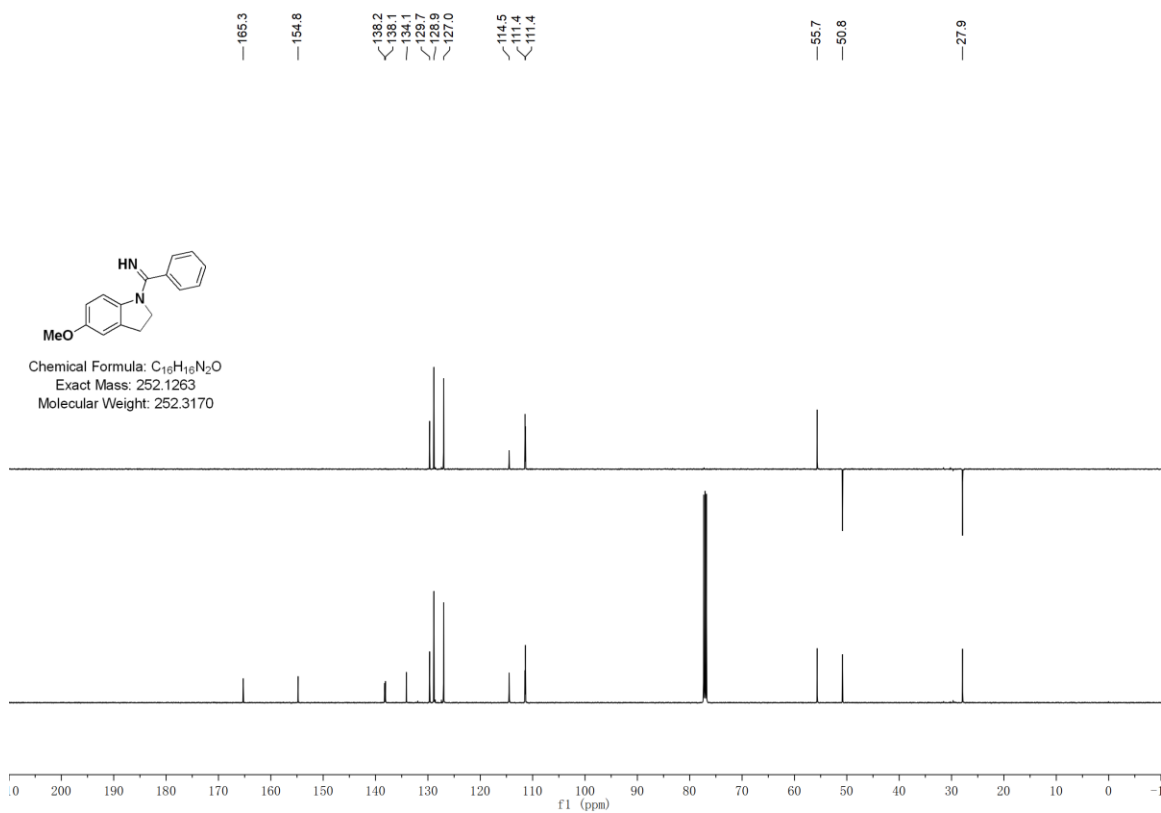

<sup>13</sup>C NMR spectrum of **1e** (125 MHz, Chloroform-*d*)

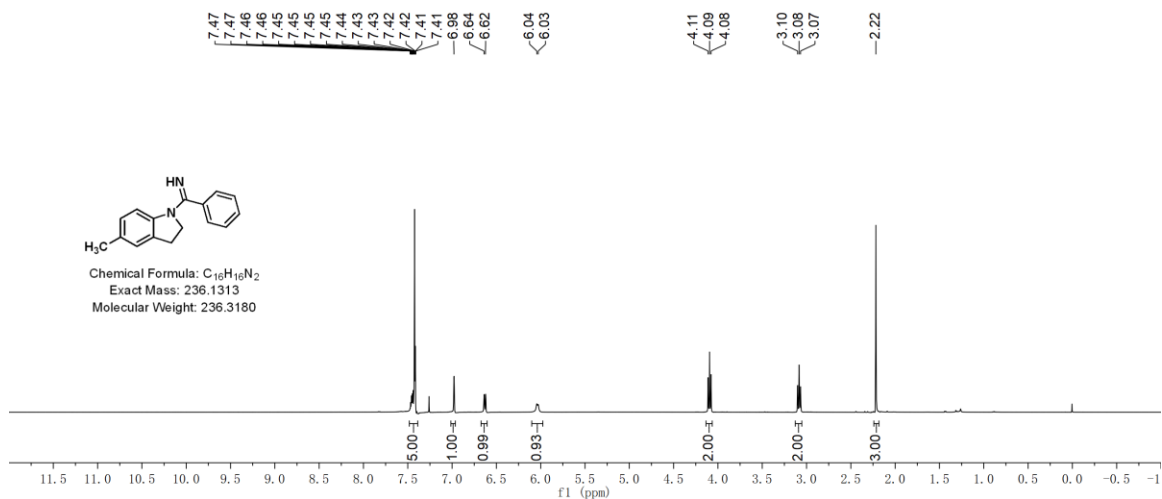

<sup>1</sup>H NMR spectrum of **1f** (500 MHz, Chloroform-*d*)

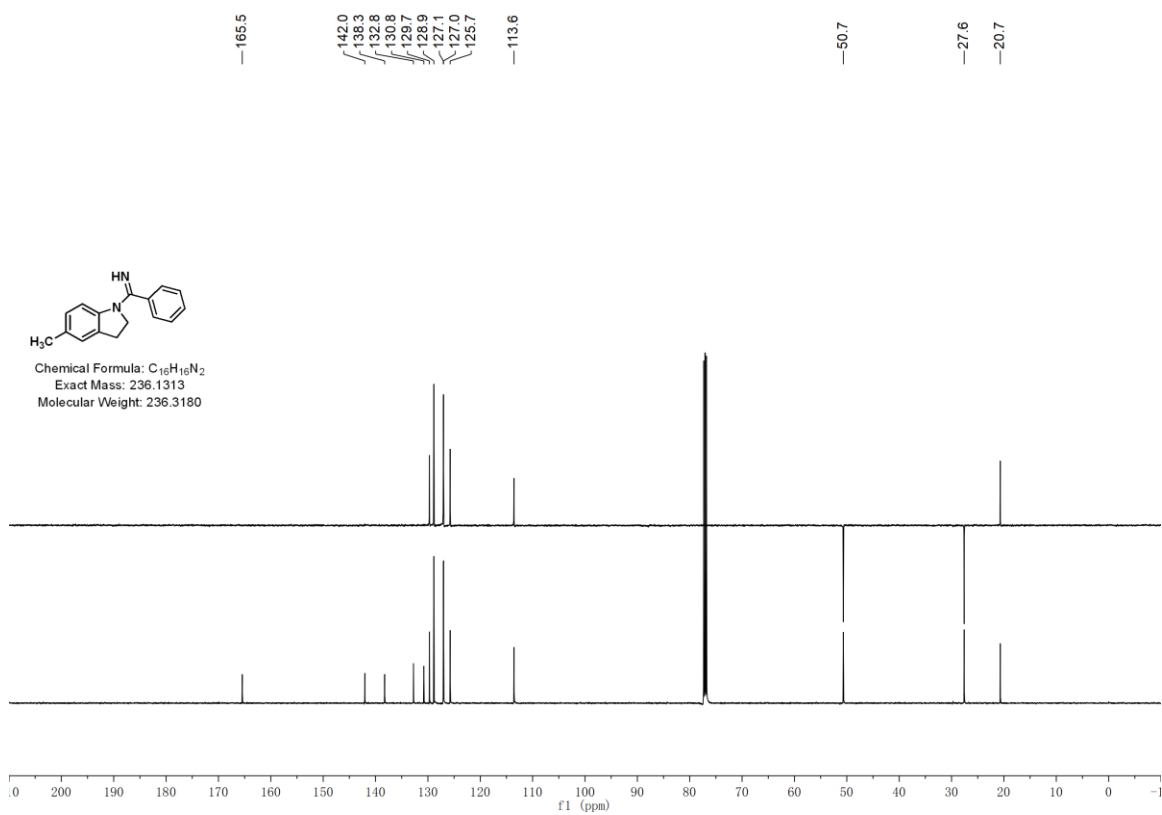

<sup>13</sup>C NMR spectrum of **1f** (125 MHz, Chloroform-*d*)

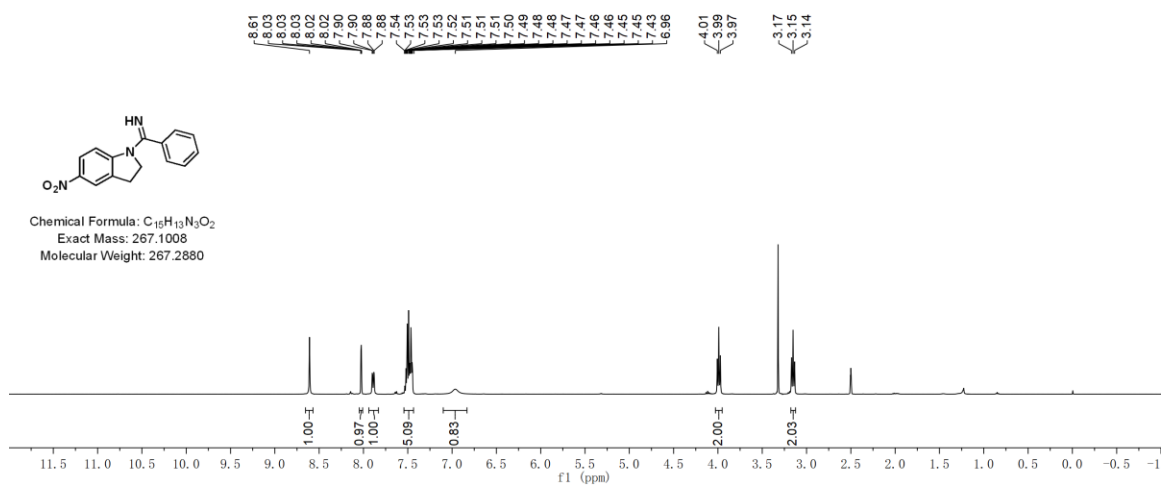

$^1H$  NMR spectrum of **1g** (500 MHz, DMSO- $d_6$ )

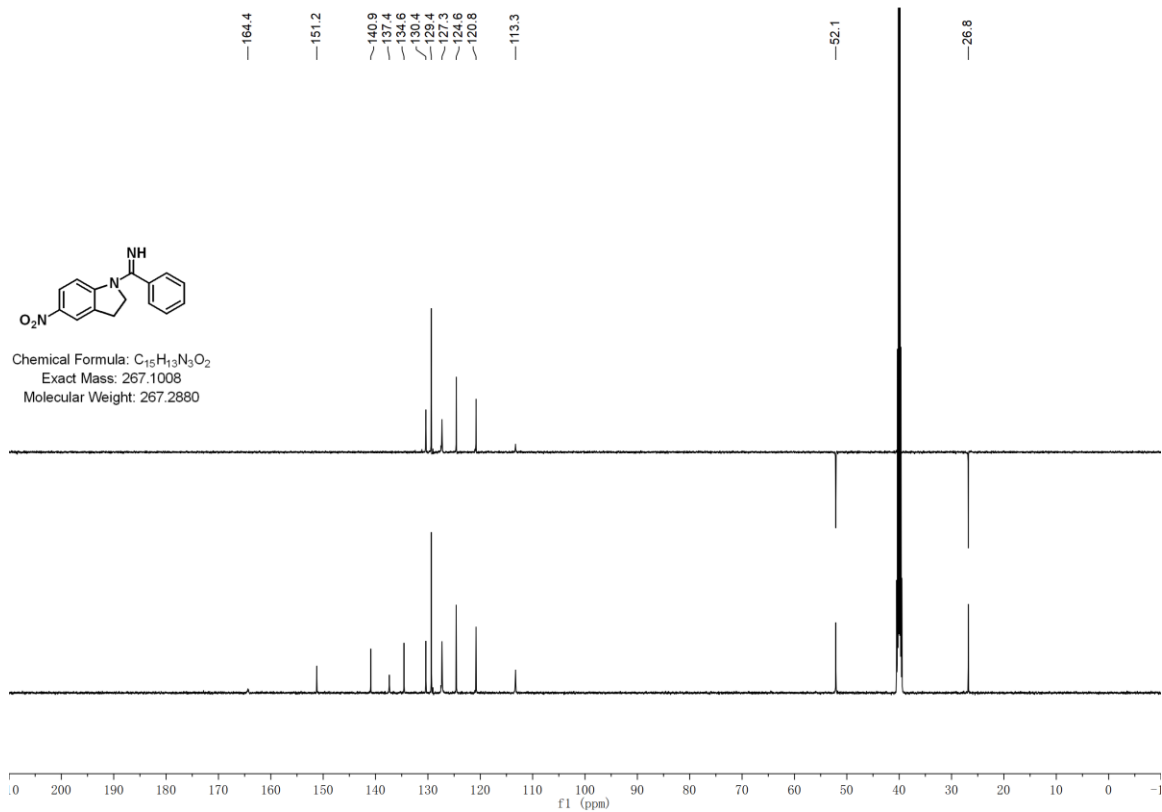

$^{13}C$  NMR spectrum of **1g** (125 MHz, DMSO- $d_6$ )

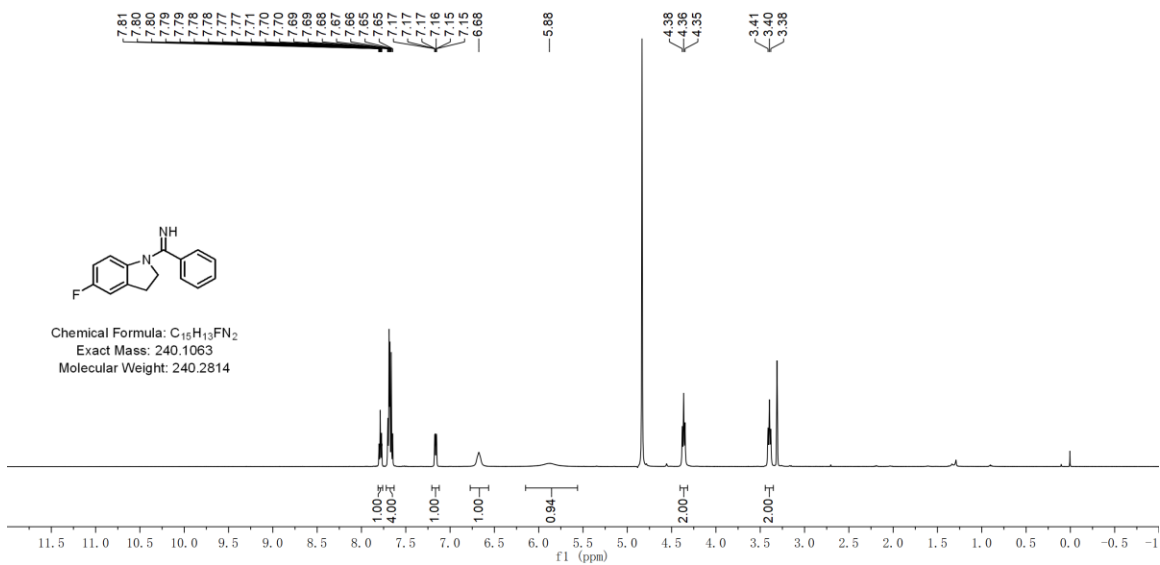

<sup>1</sup>H NMR spectrum of **1h** (500 MHz, Methanol-*d*<sub>4</sub>)

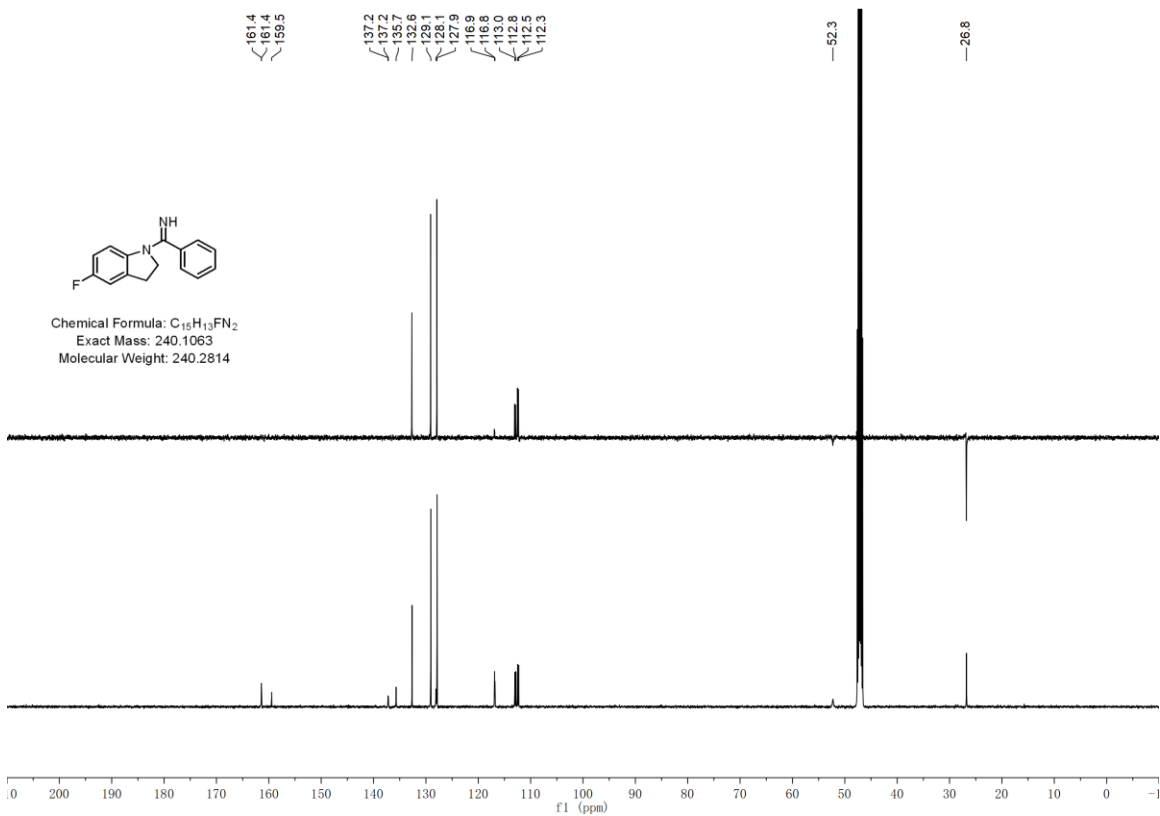

<sup>13</sup>C NMR spectrum of **1h** (125 MHz, Methanol-*d*<sub>4</sub>)



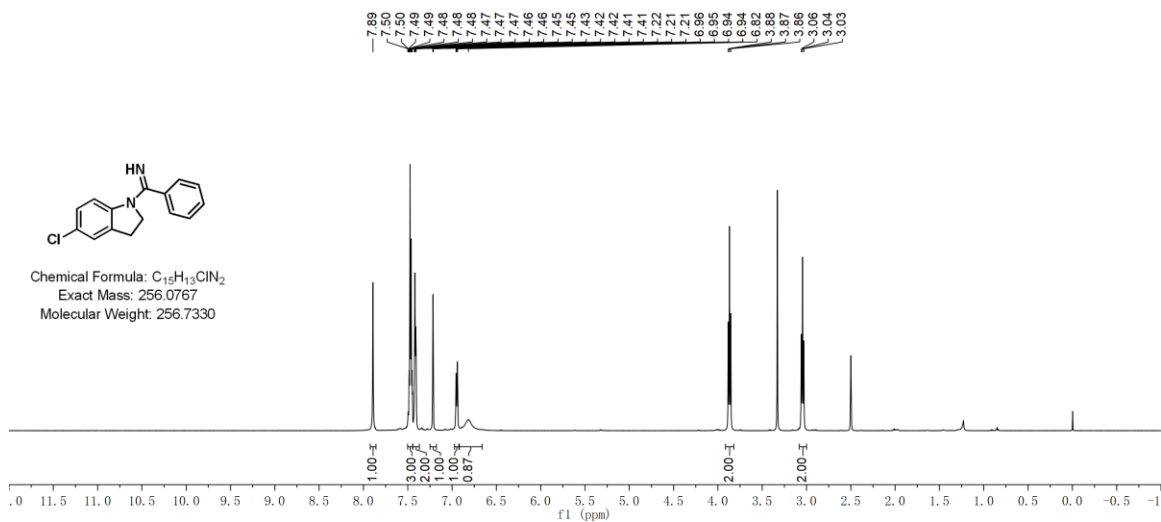

$^1H$  NMR spectrum of **1i** (600 MHz,  $DMSO-d_6$ )

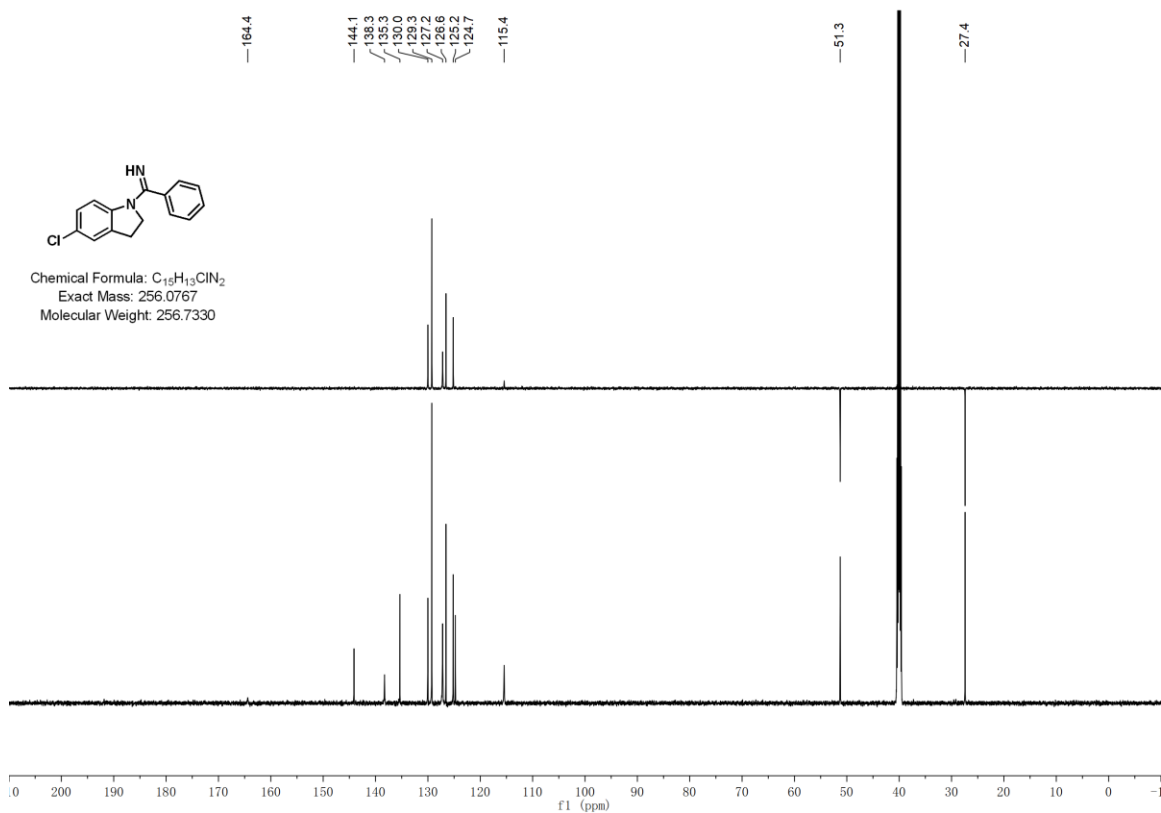

$^{13}C$  NMR spectrum of **1i** (150 MHz,  $DMSO-d_6$ )

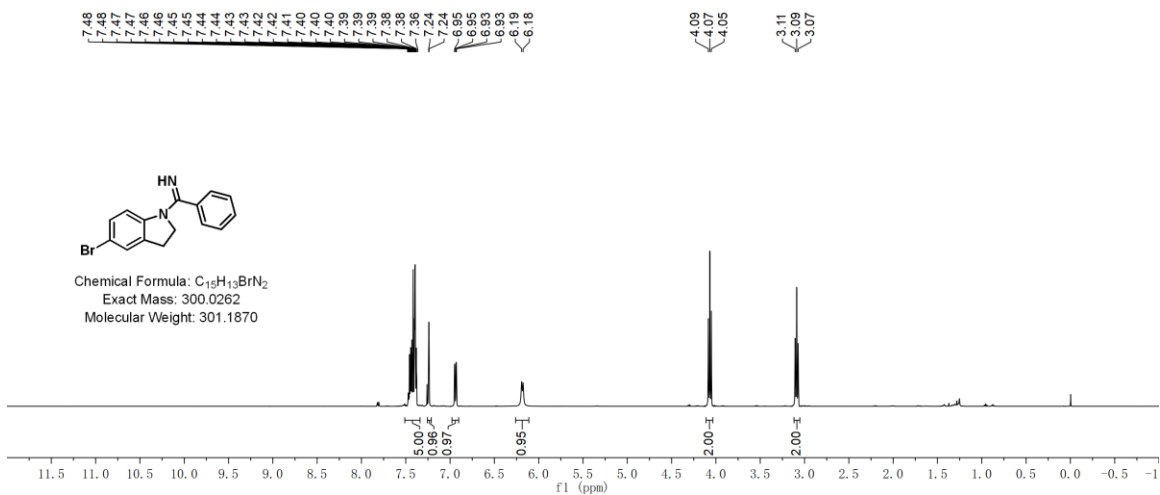

$^1H$  NMR spectrum of **1j** (500 MHz, Chloroform-*d*)

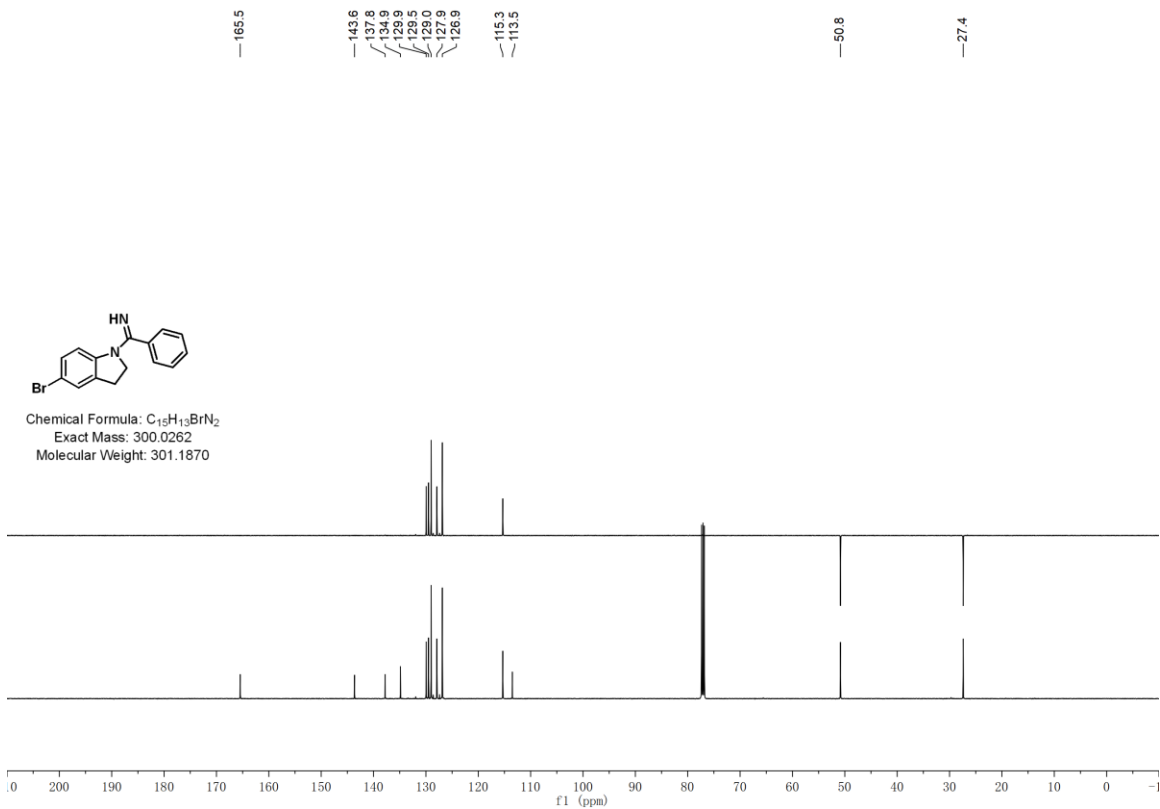

$^{13}C$  NMR spectrum of **1j** (125 MHz, Chloroform-*d*)

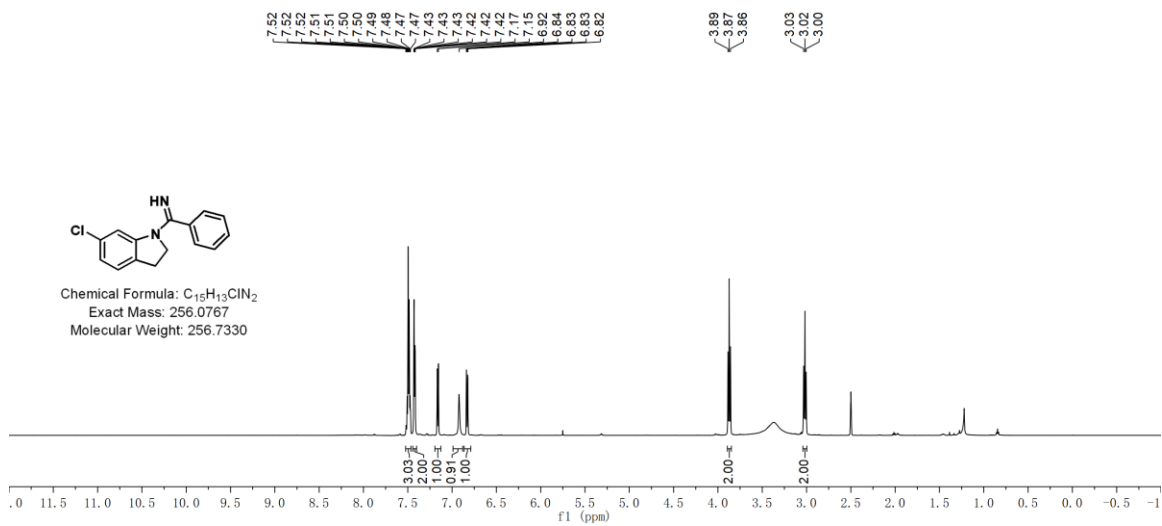

<sup>1</sup>H NMR spectrum of **1k** (600 MHz, DMSO-*d*<sub>6</sub>)

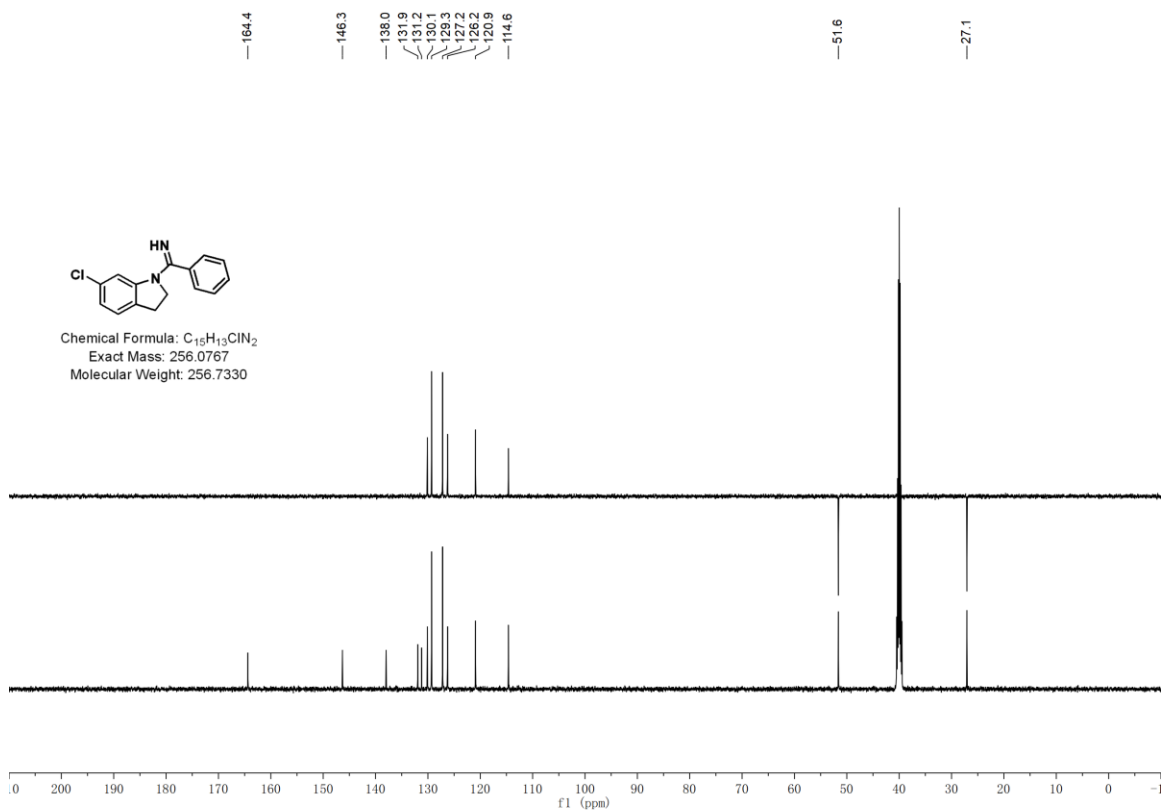

<sup>13</sup>C NMR spectrum of **1k** (125 MHz, DMSO-*d*<sub>6</sub>)

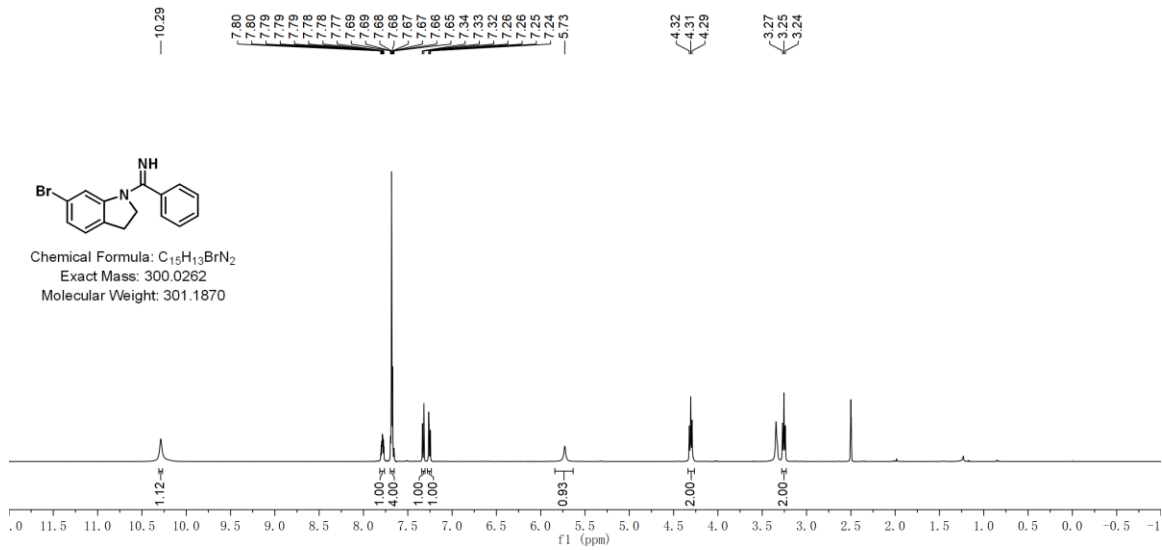

$^1H$  NMR spectrum of **11** (500 MHz, DMSO- $d_6$ )

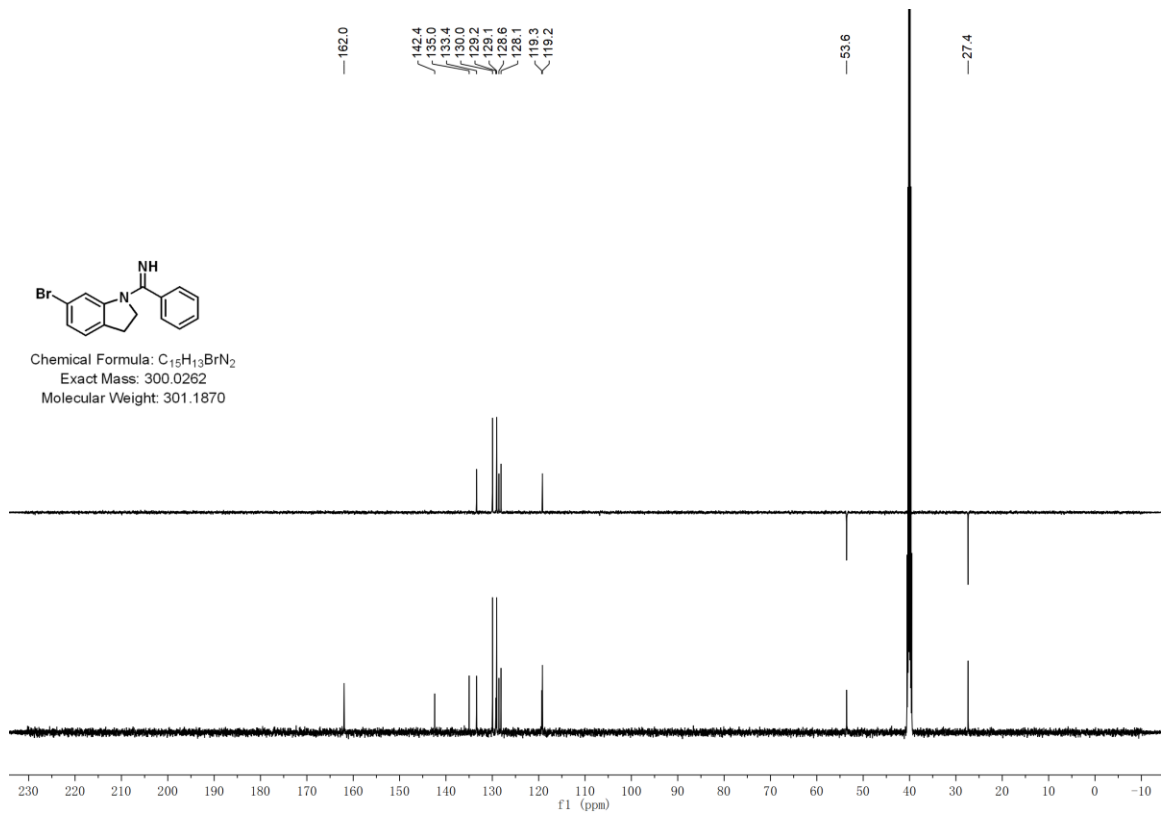

$^{13}C$  NMR spectrum of **11** (125 MHz, DMSO- $d_6$ )

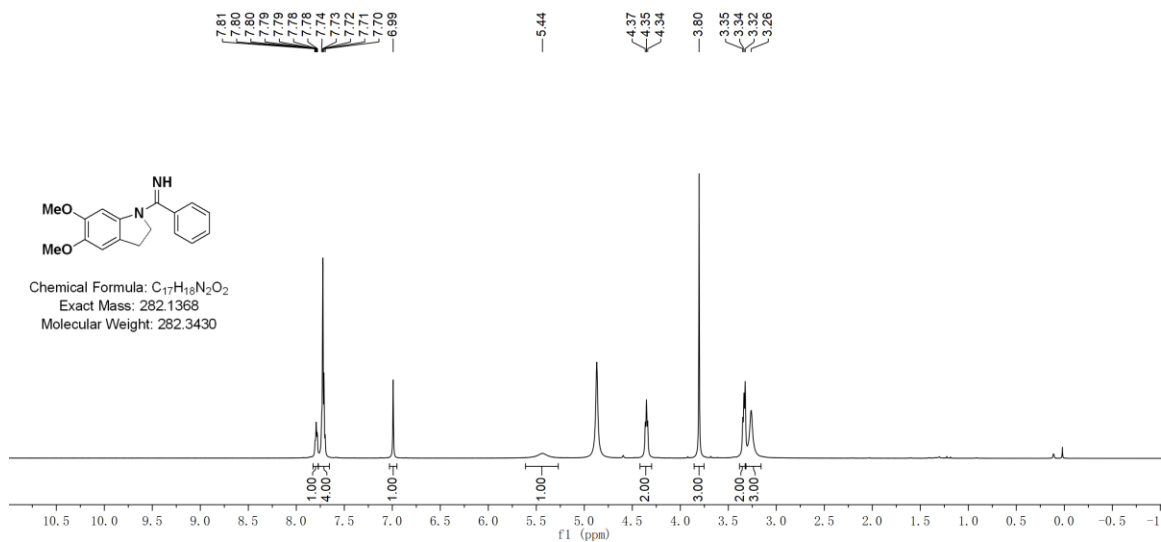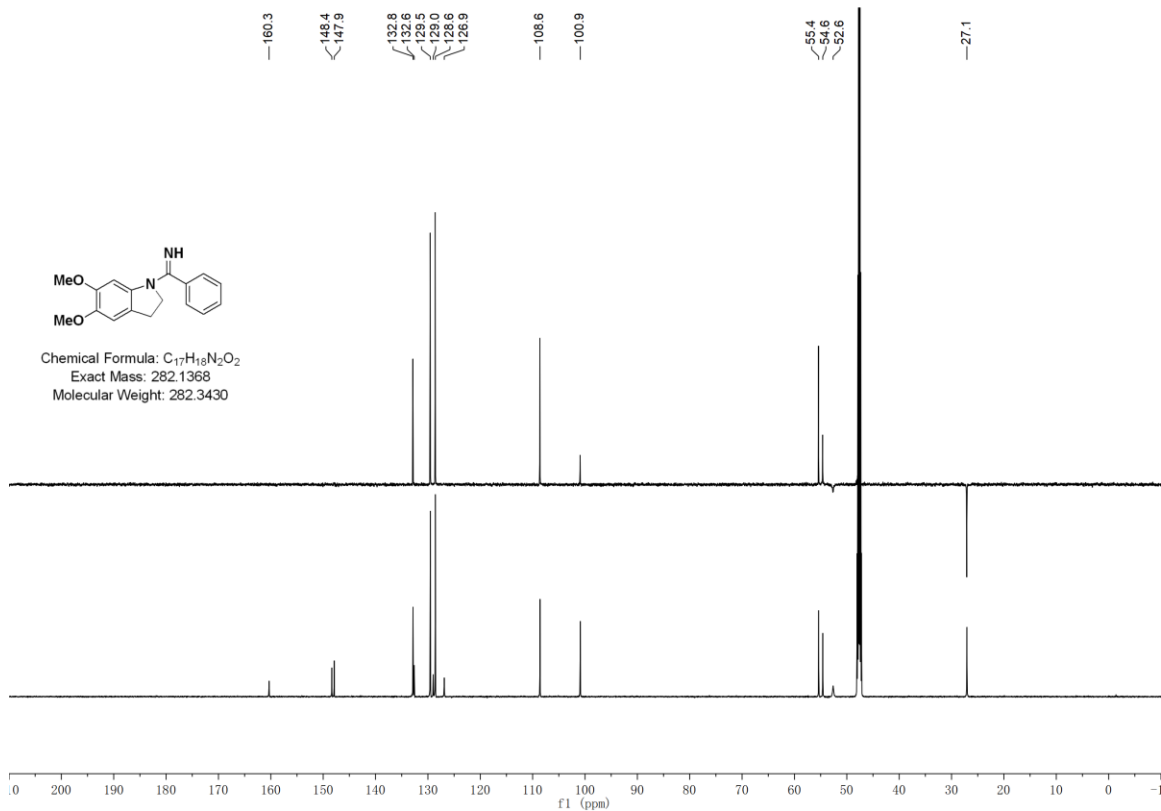

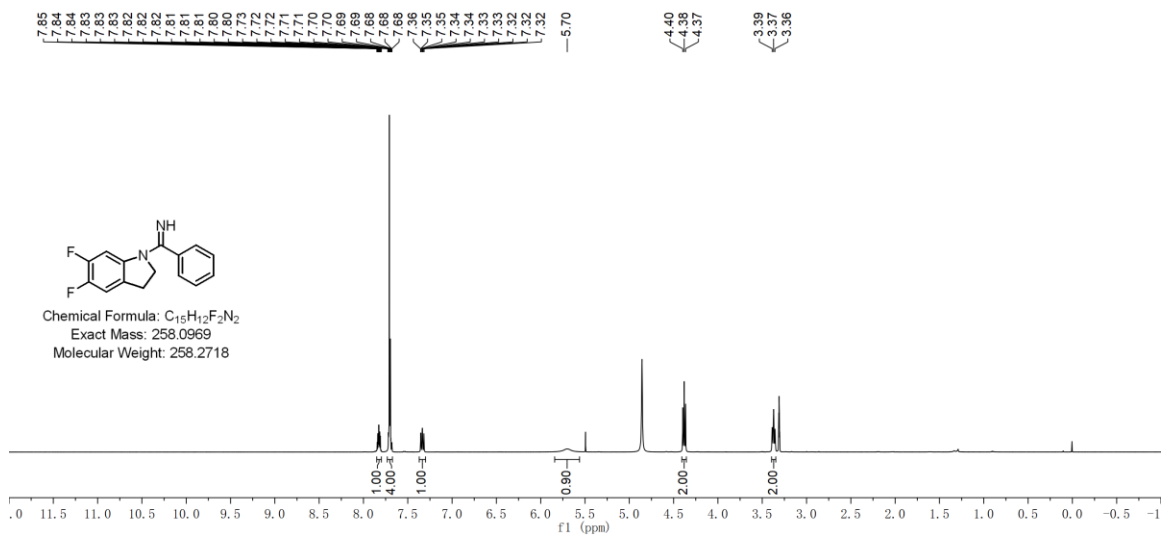

$^1H$  NMR spectrum of **1n** (500 MHz, Methanol- $d_4$ )

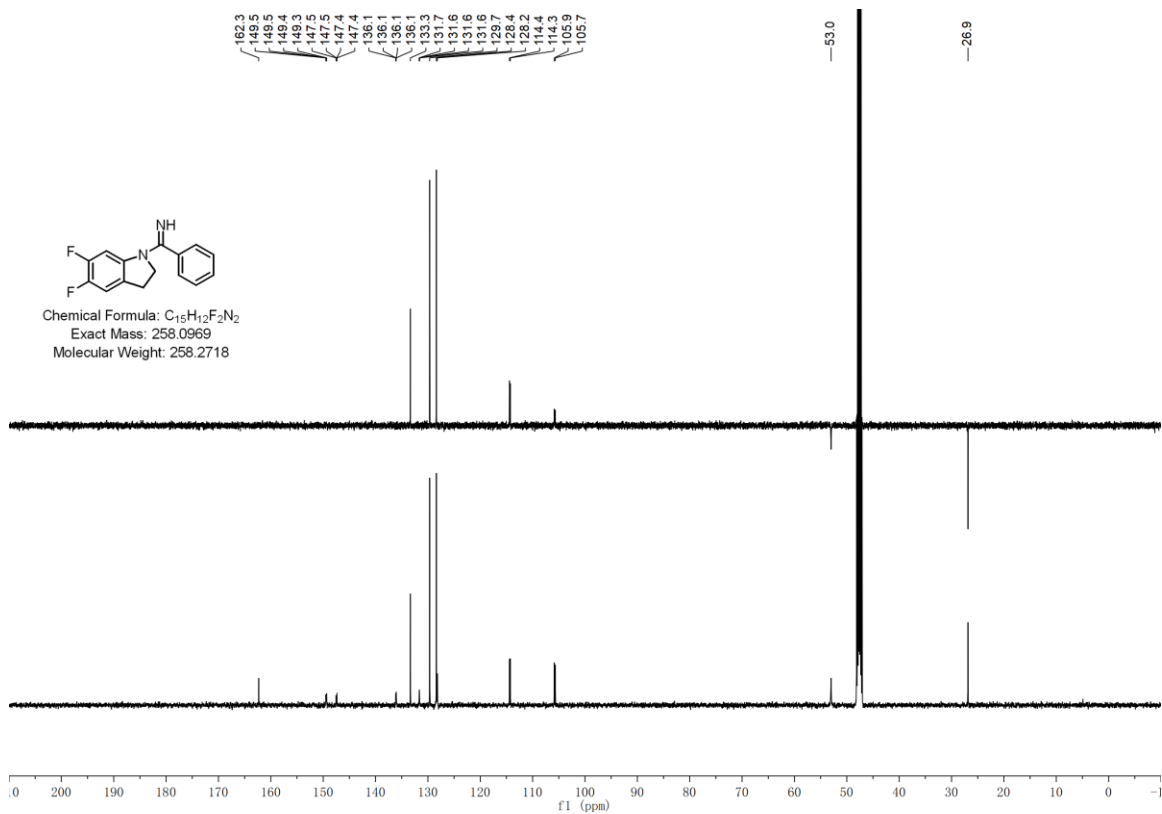

$^{13}C$  NMR spectrum of **1n** (125 MHz, Methanol- $d_4$ )

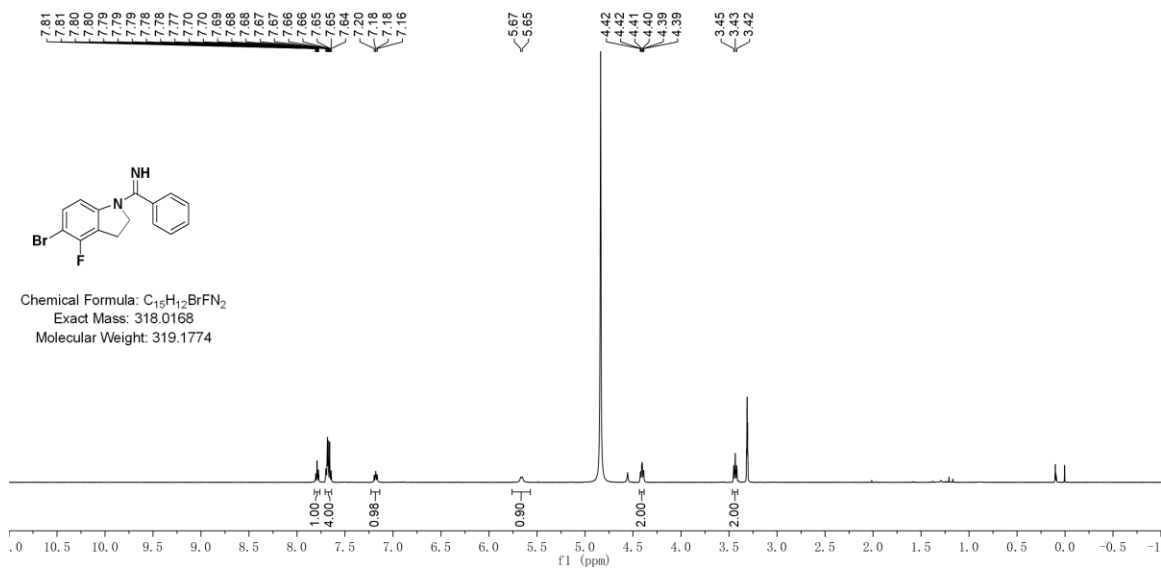

$^1H$  NMR spectrum of **1o** (500 MHz, Methanol- $d_4$ )

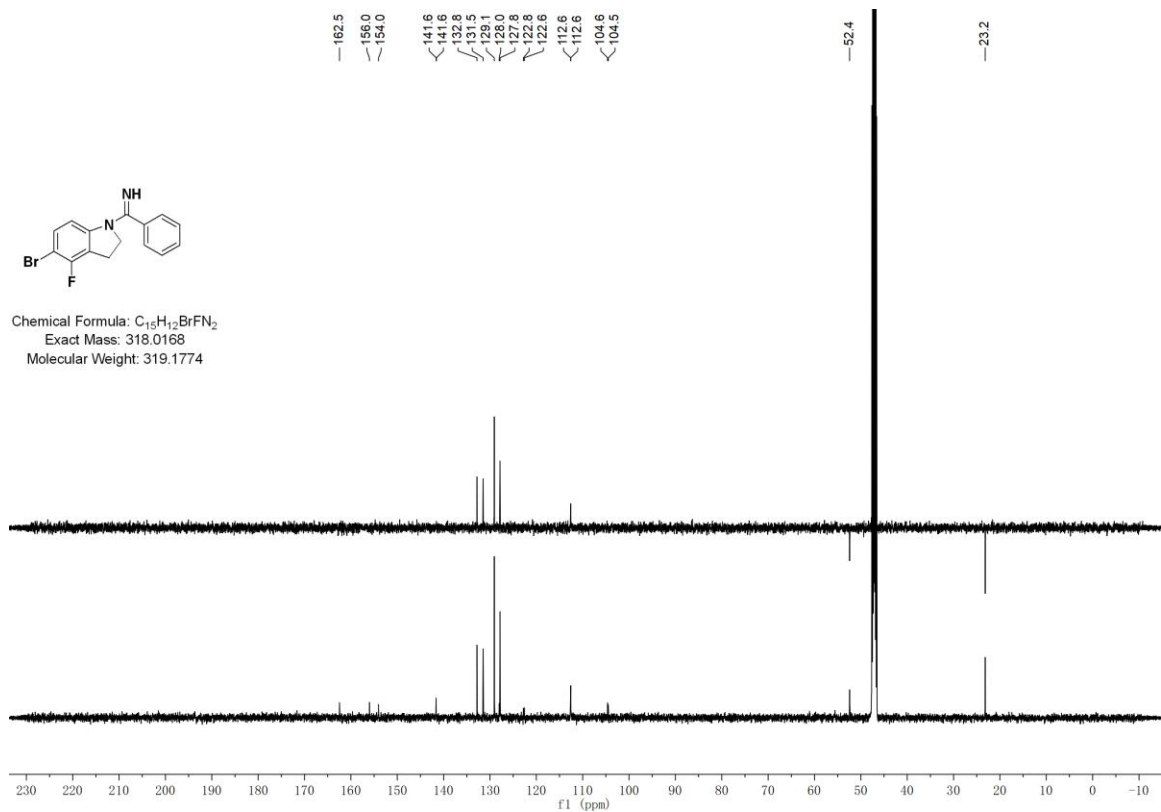

$^{13}C$  NMR spectrum of **1o** (125 MHz, Methanol- $d_4$ )

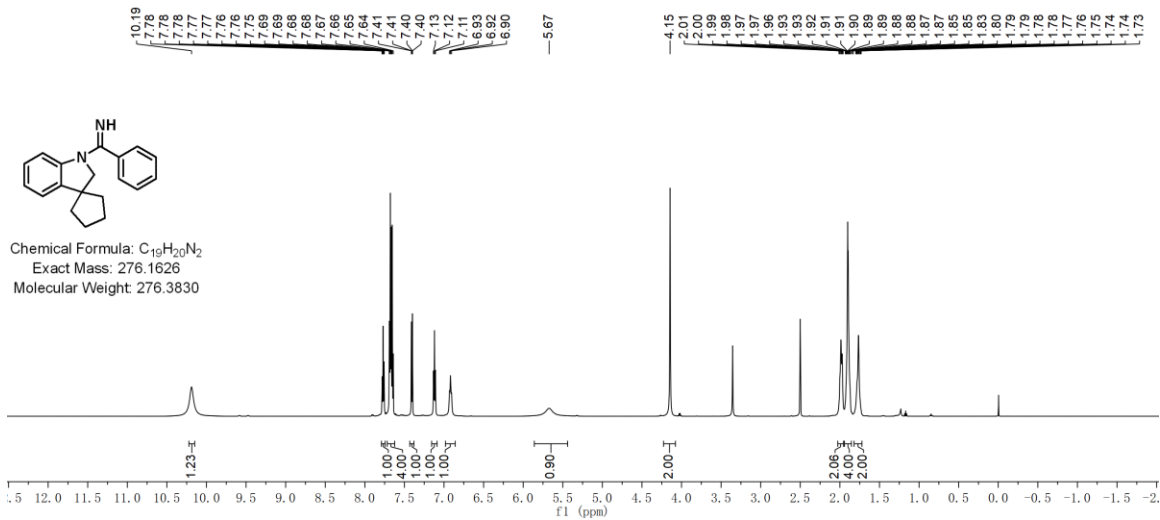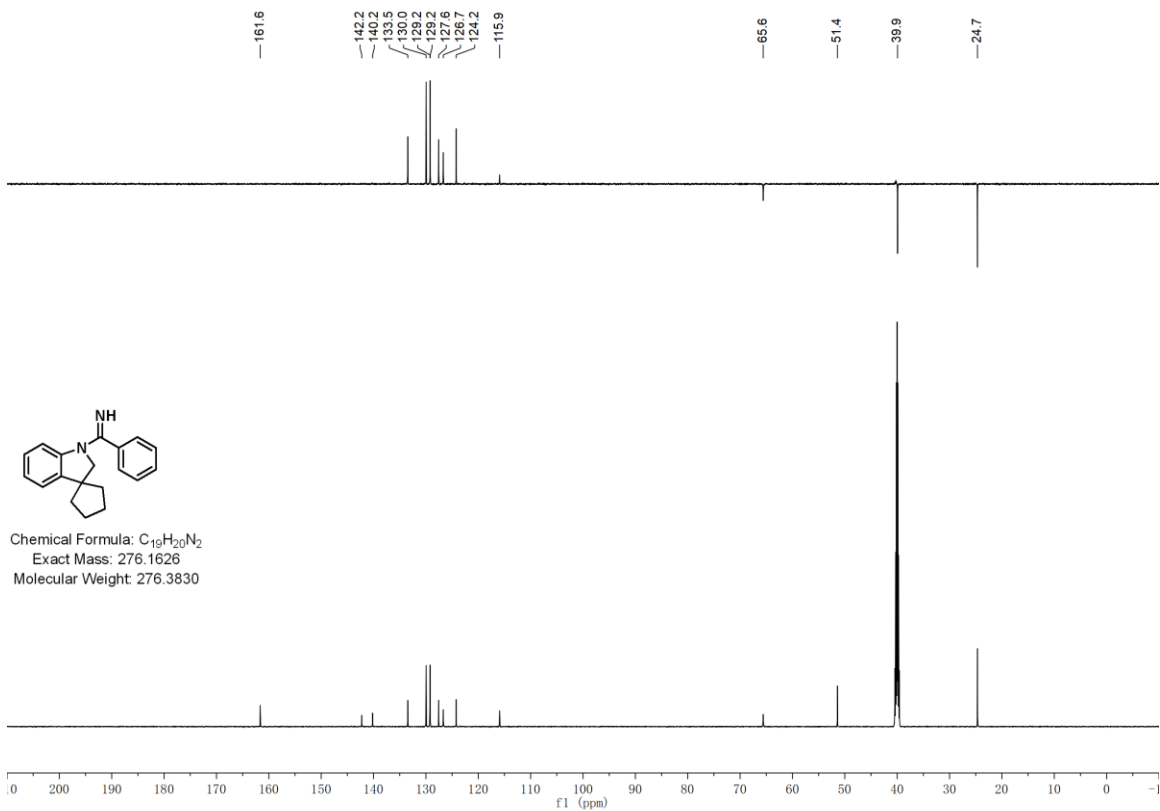



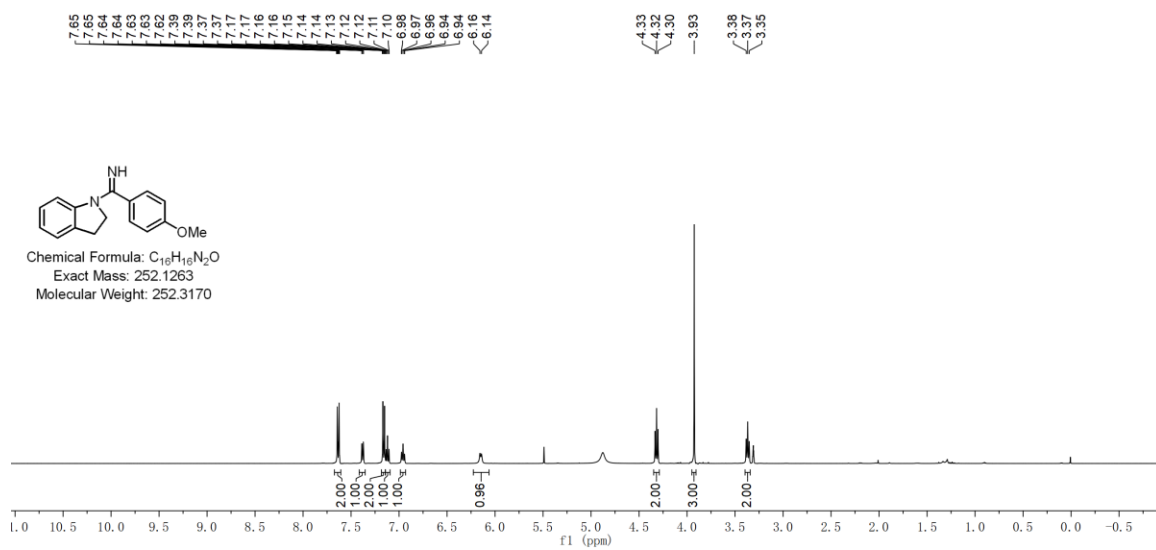

<sup>1</sup>H NMR spectrum of **1q** (500 MHz, Methanol-*d*<sub>4</sub>)

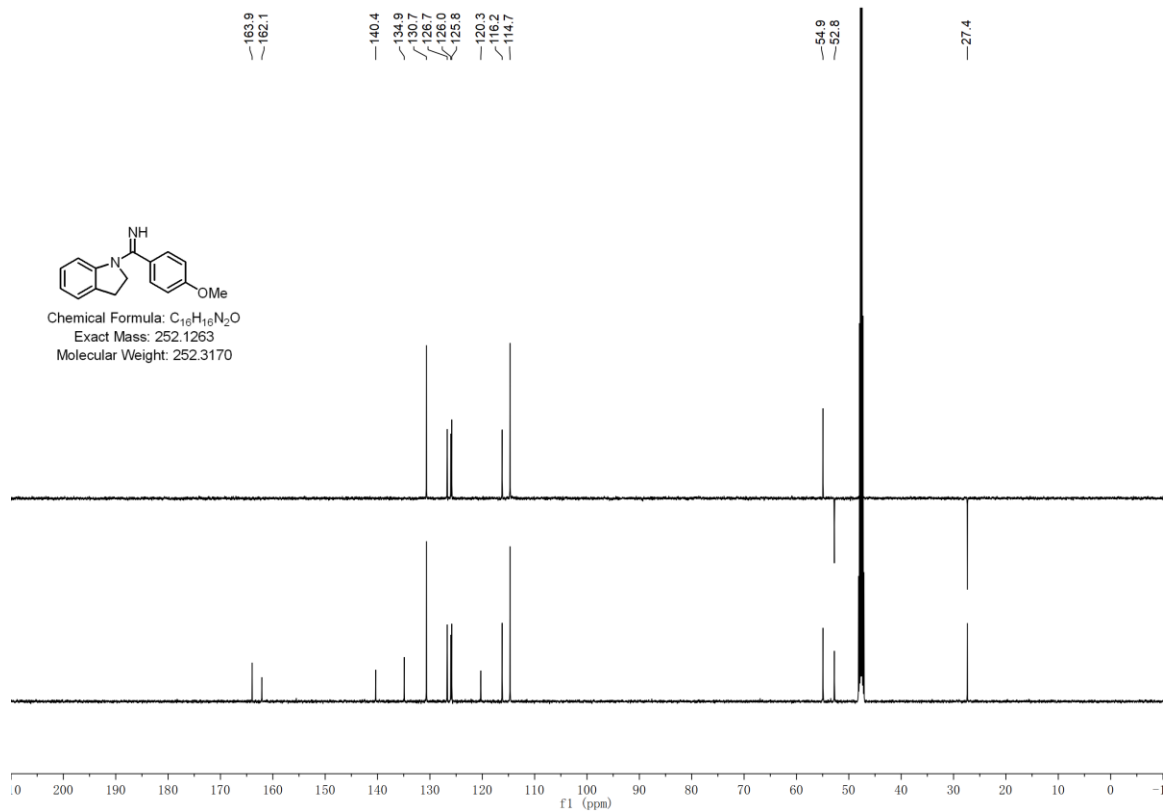

<sup>13</sup>C NMR spectrum of **1q** (125 MHz, Methanol-*d*<sub>4</sub>)

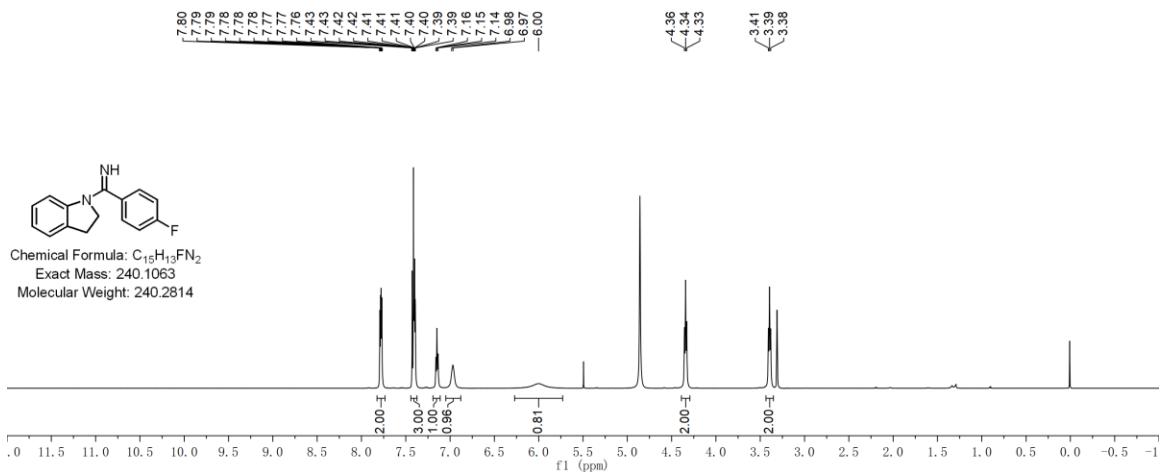

<sup>1</sup>H NMR spectrum of **1r** (600 MHz, Methanol-*d*<sub>4</sub>)

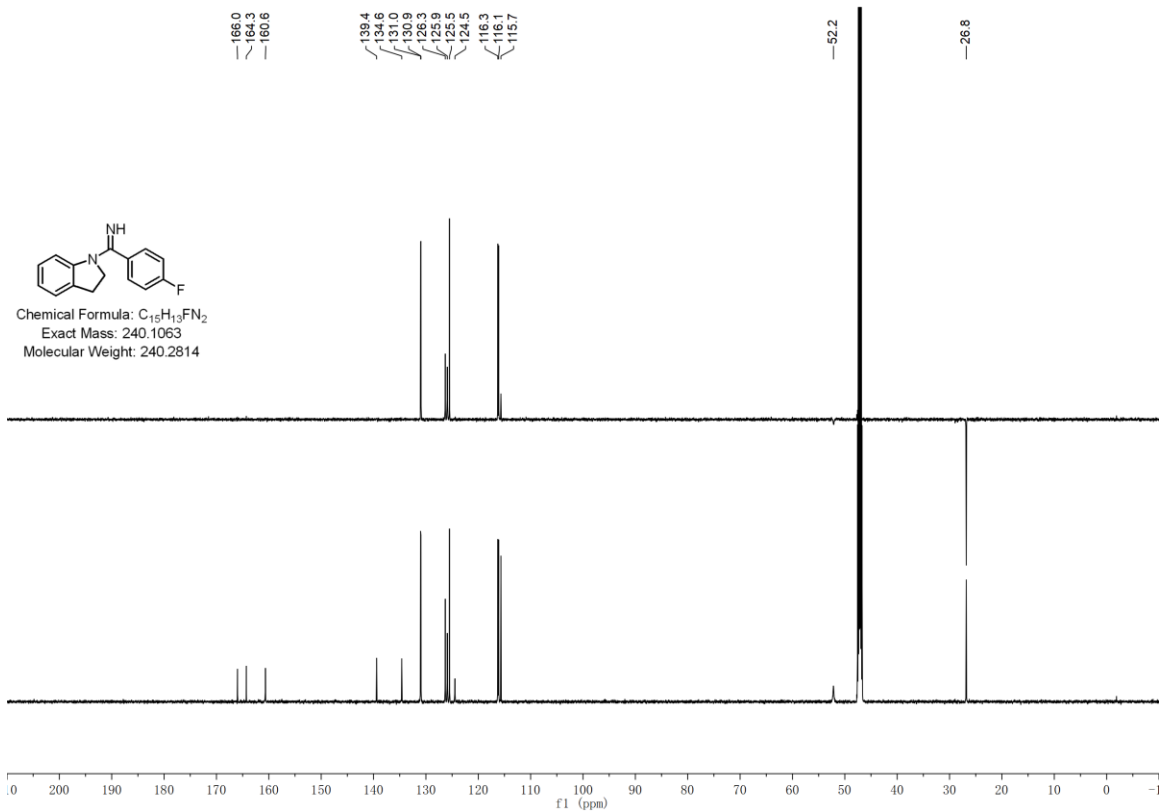

<sup>13</sup>C NMR spectrum of **1r** (150 MHz, Methanol-*d*<sub>4</sub>)

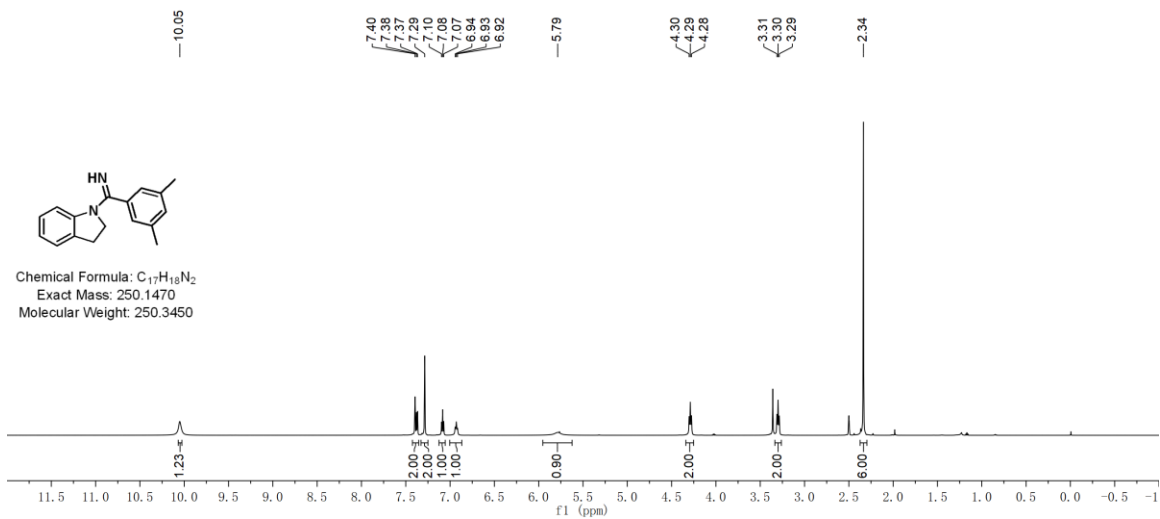

<sup>1</sup>H NMR spectrum of **1s** (600 MHz, DMSO-*d*<sub>6</sub>)

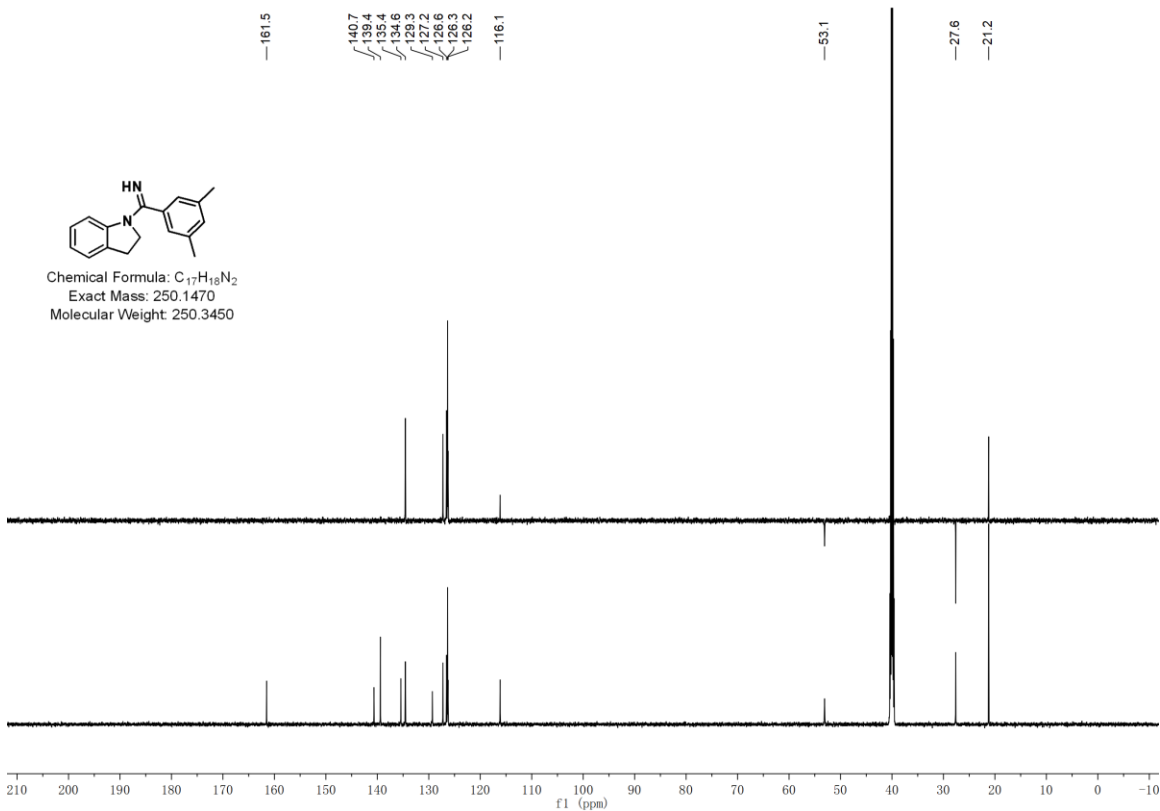

<sup>13</sup>C NMR spectrum of **1s** (150 MHz, DMSO-*d*<sub>6</sub>)

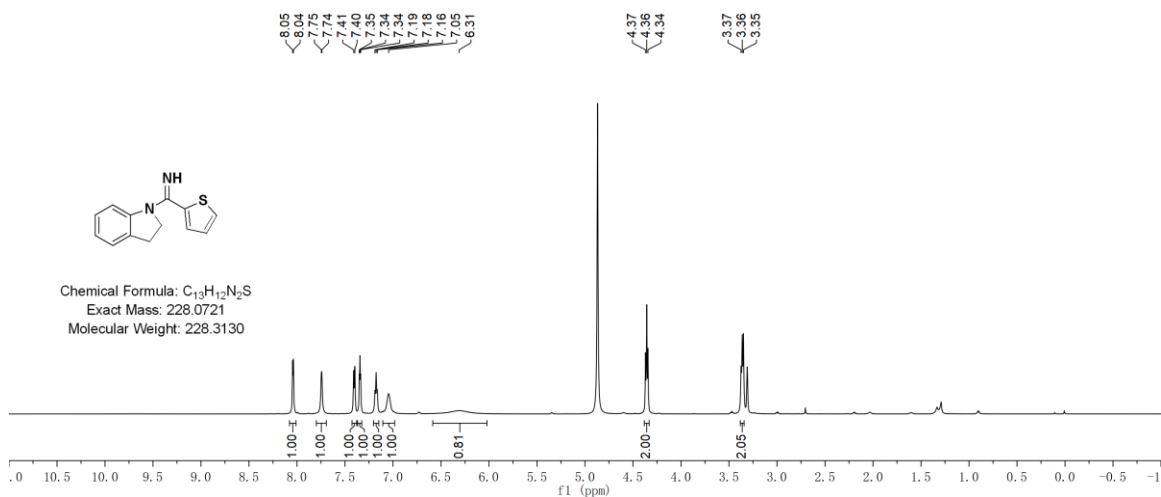

<sup>1</sup>H NMR spectrum of **1t** (600 MHz, Methanol-*d*<sub>4</sub>)

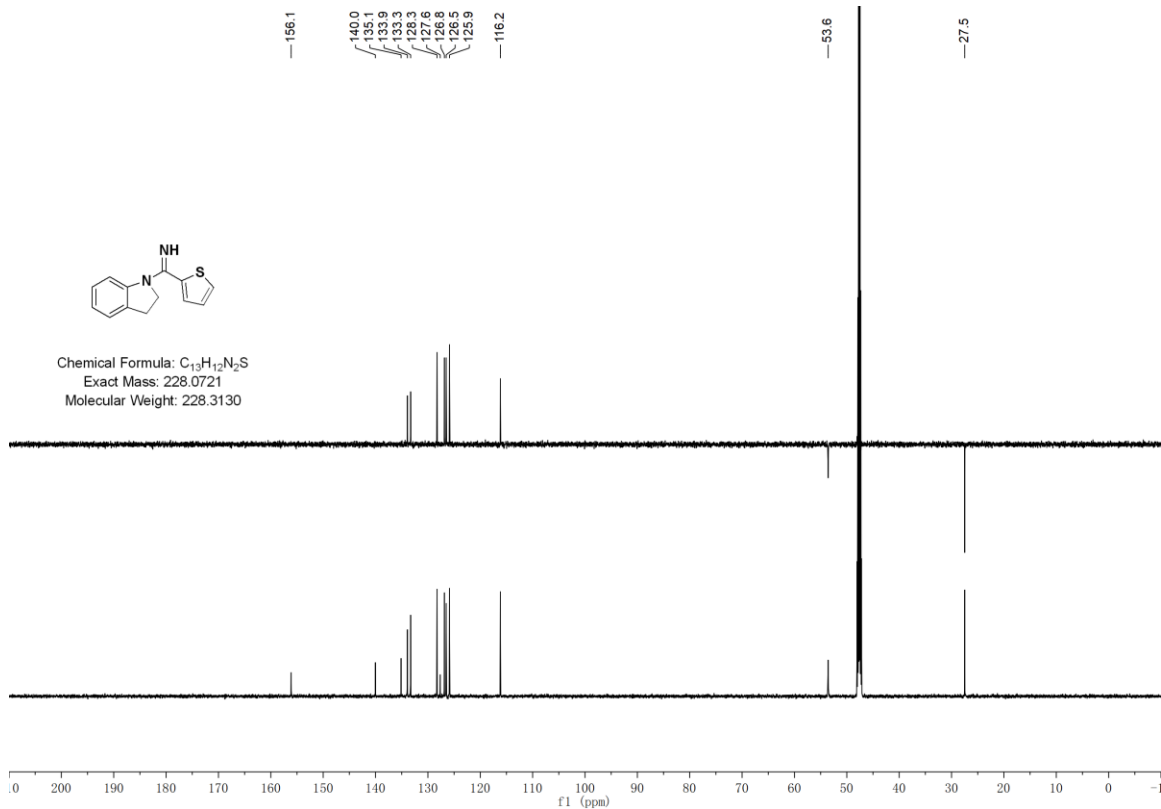

<sup>13</sup>C NMR spectrum of **1t** (150 MHz, Methanol-*d*<sub>4</sub>)

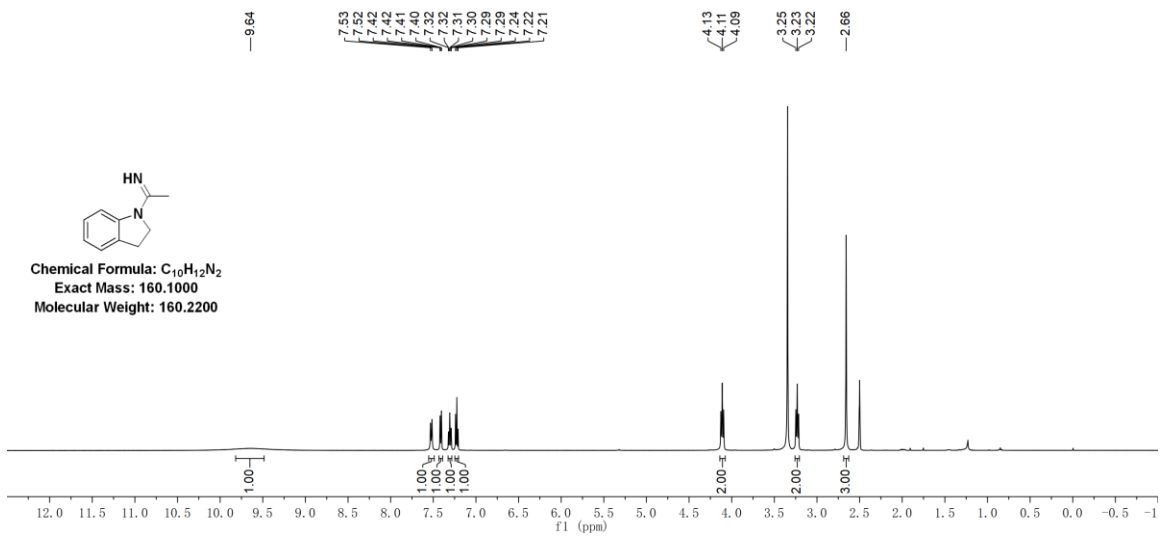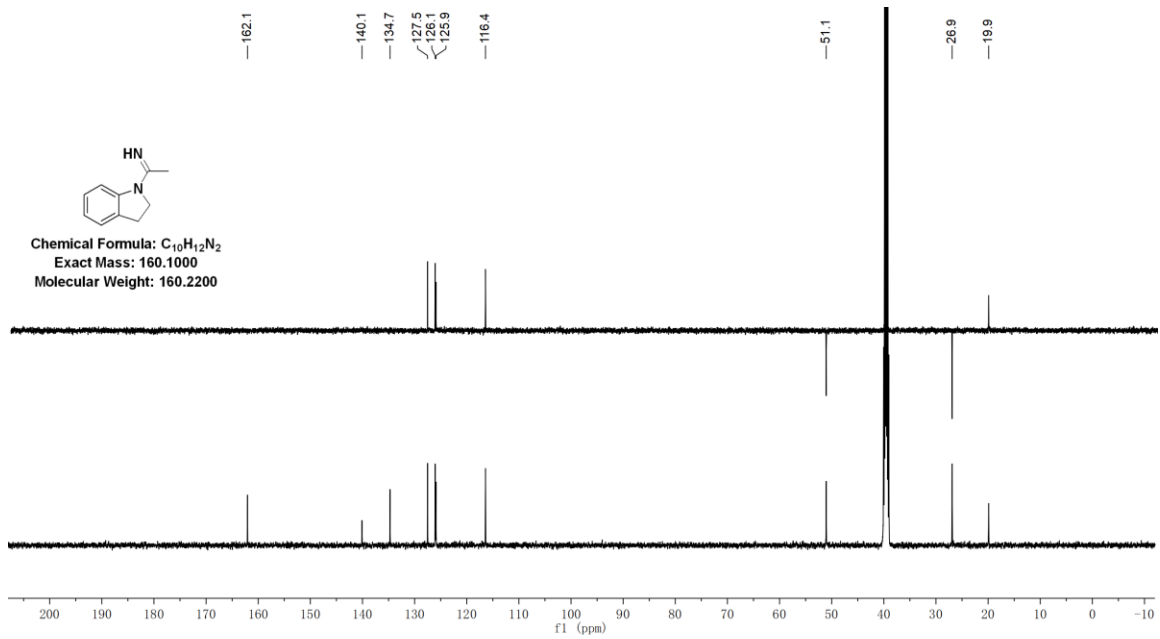

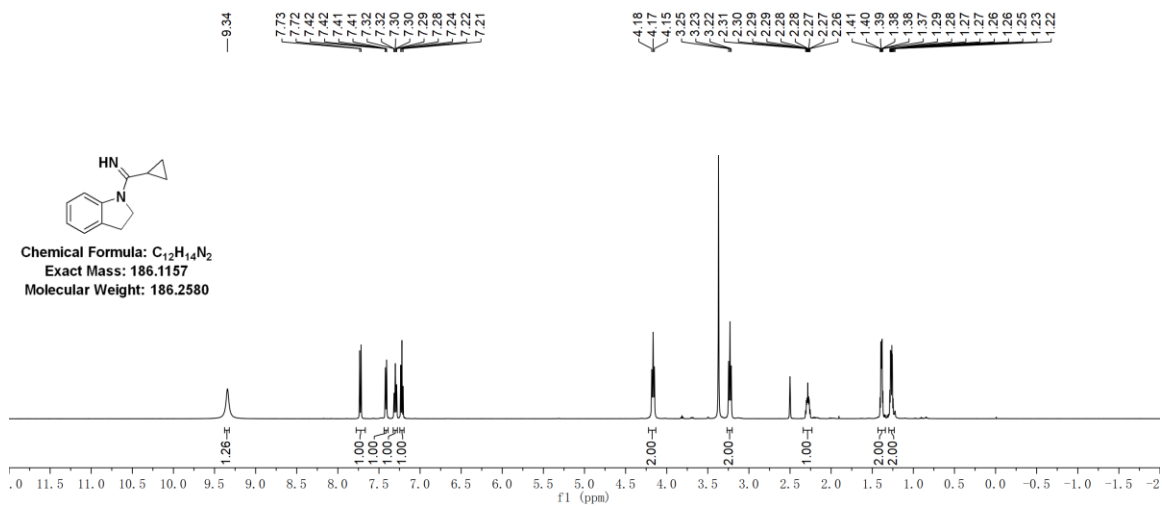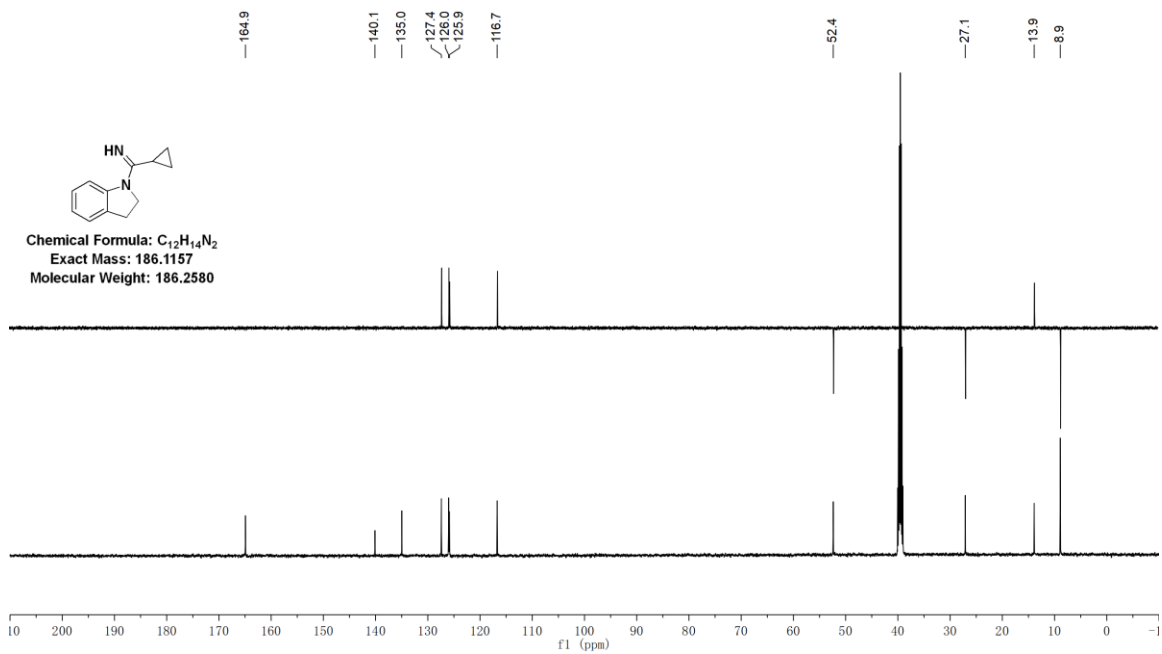

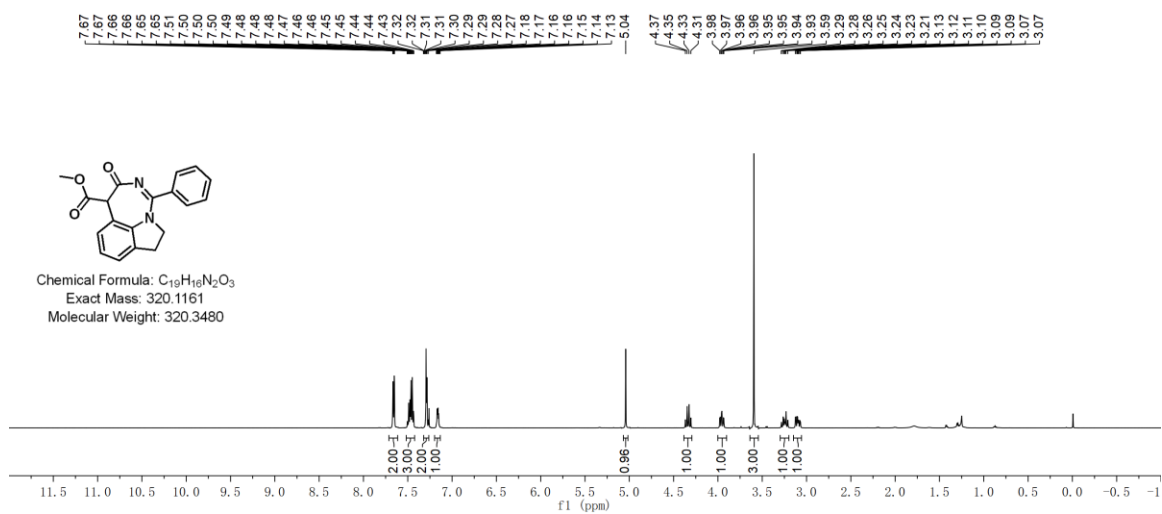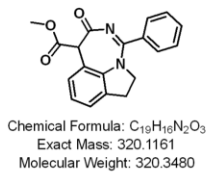

<sup>1</sup>H NMR spectrum of **3aa** (500 MHz, Chloroform-*d*)

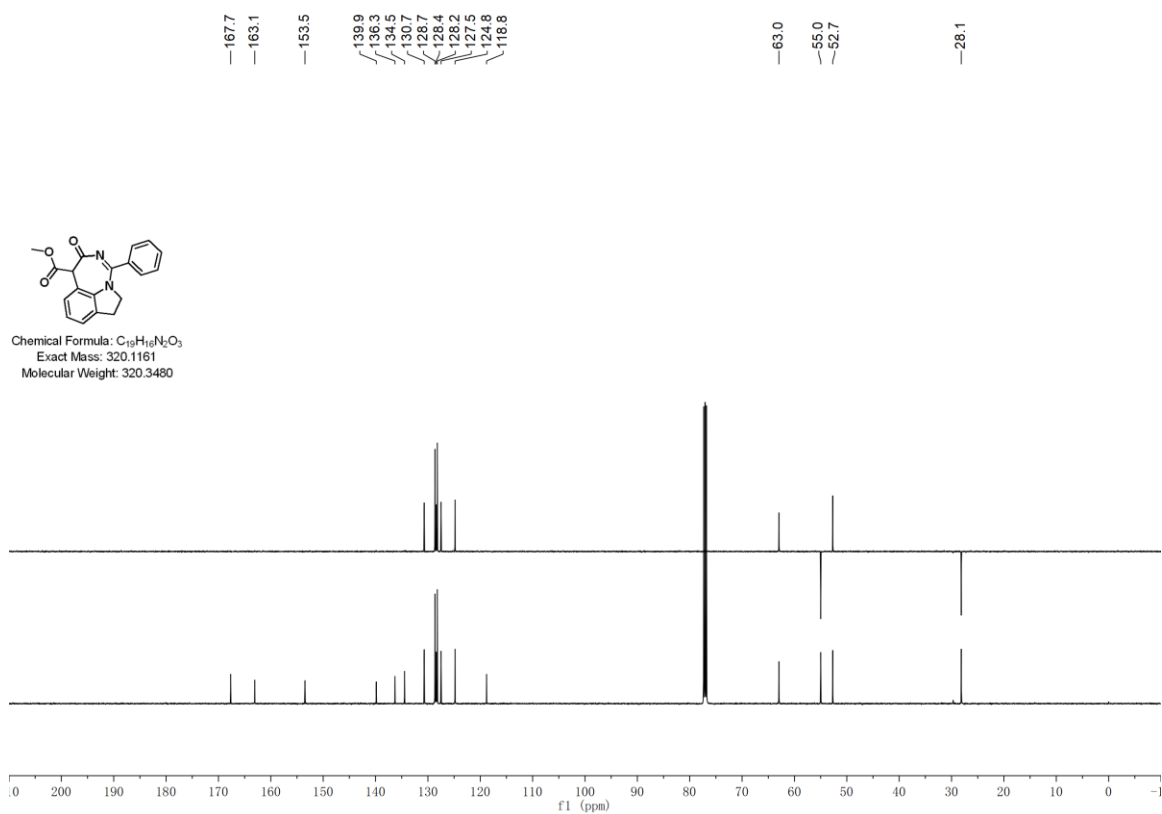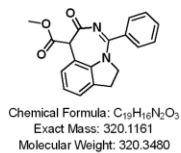

<sup>13</sup>C NMR spectrum of **3aa** (125 MHz, Chloroform-*d*)

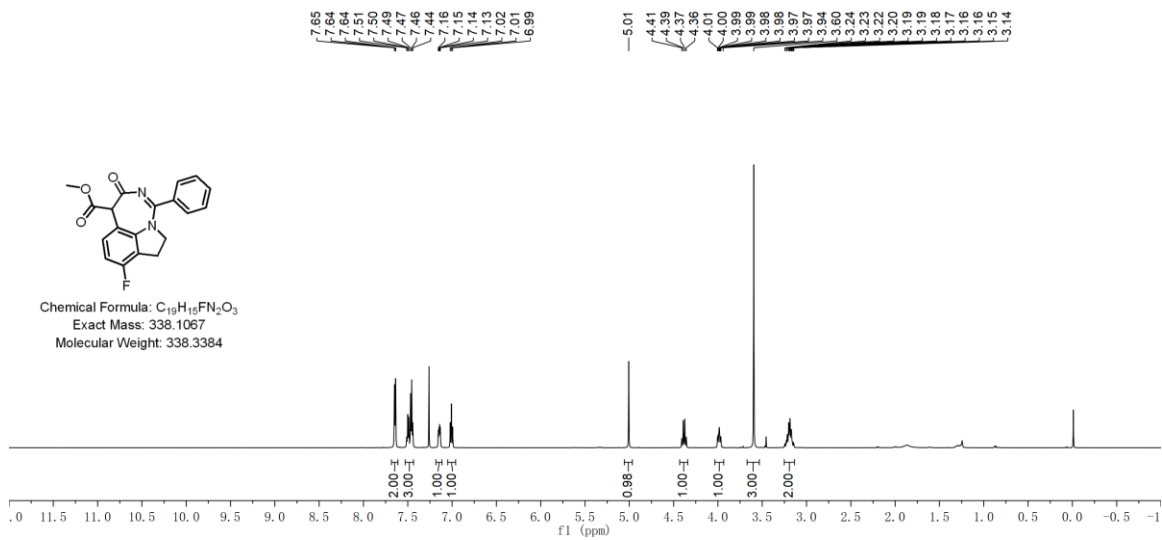

$^1\text{H}$  NMR spectrum of **3ba** (600 MHz, Chloroform-*d*)

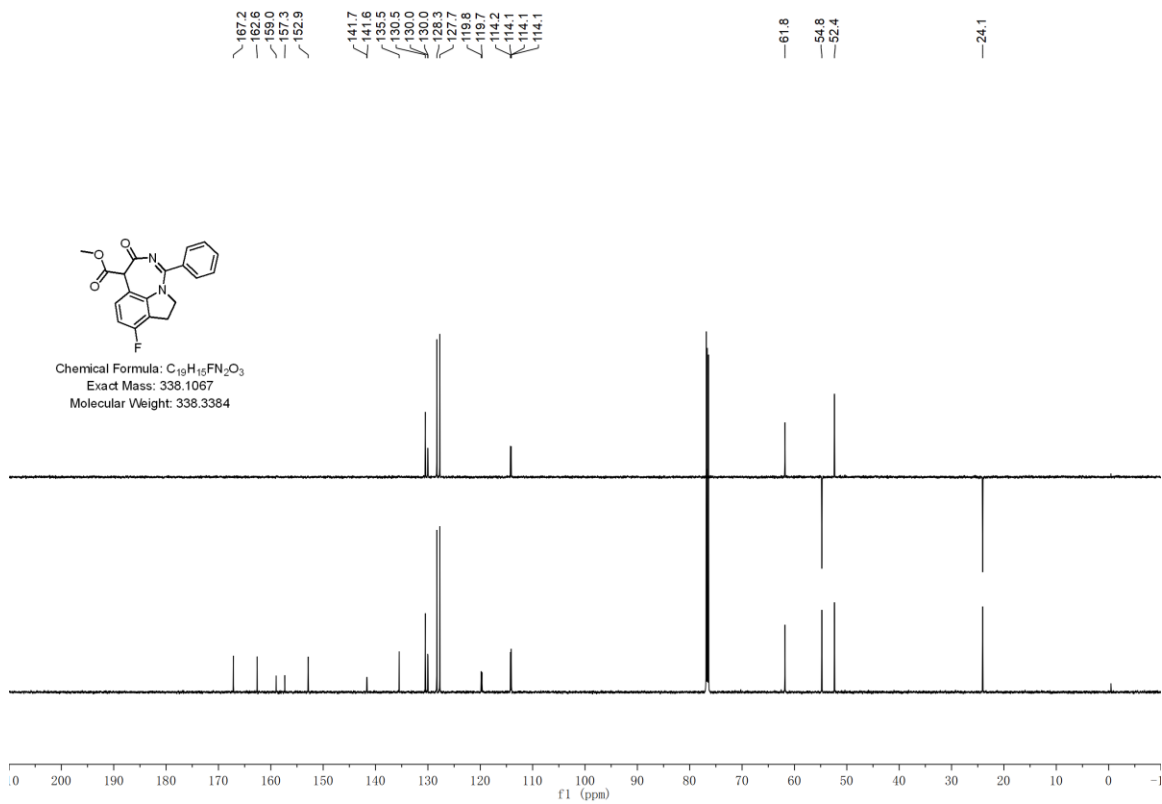

$^{13}\text{C}$  NMR spectrum of **3ba** (150 MHz, Chloroform-*d*)



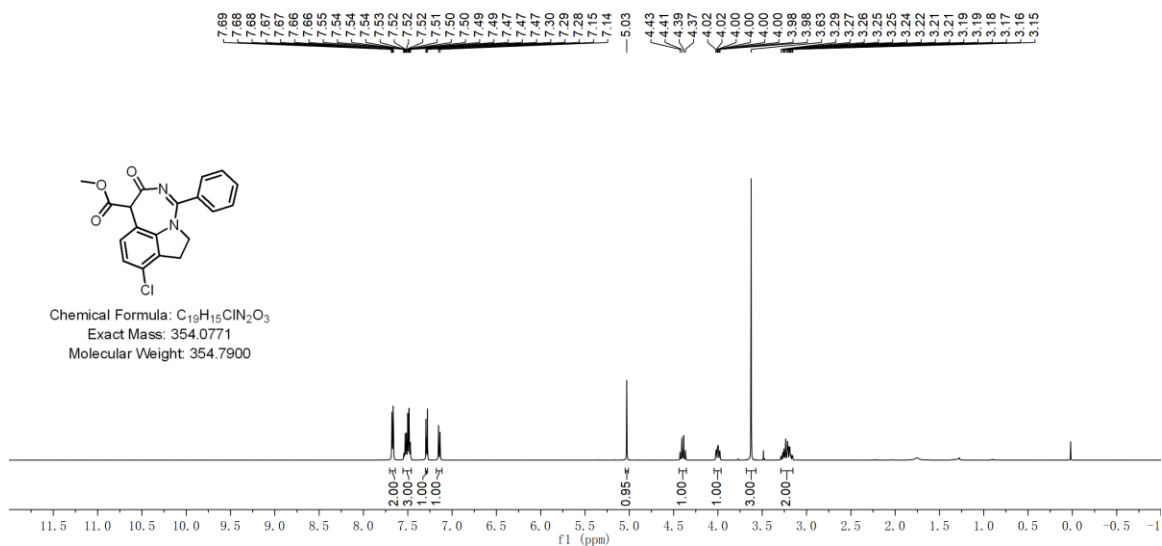

<sup>1</sup>H NMR spectrum of **3ca** (500 MHz, Chloroform-*d*)

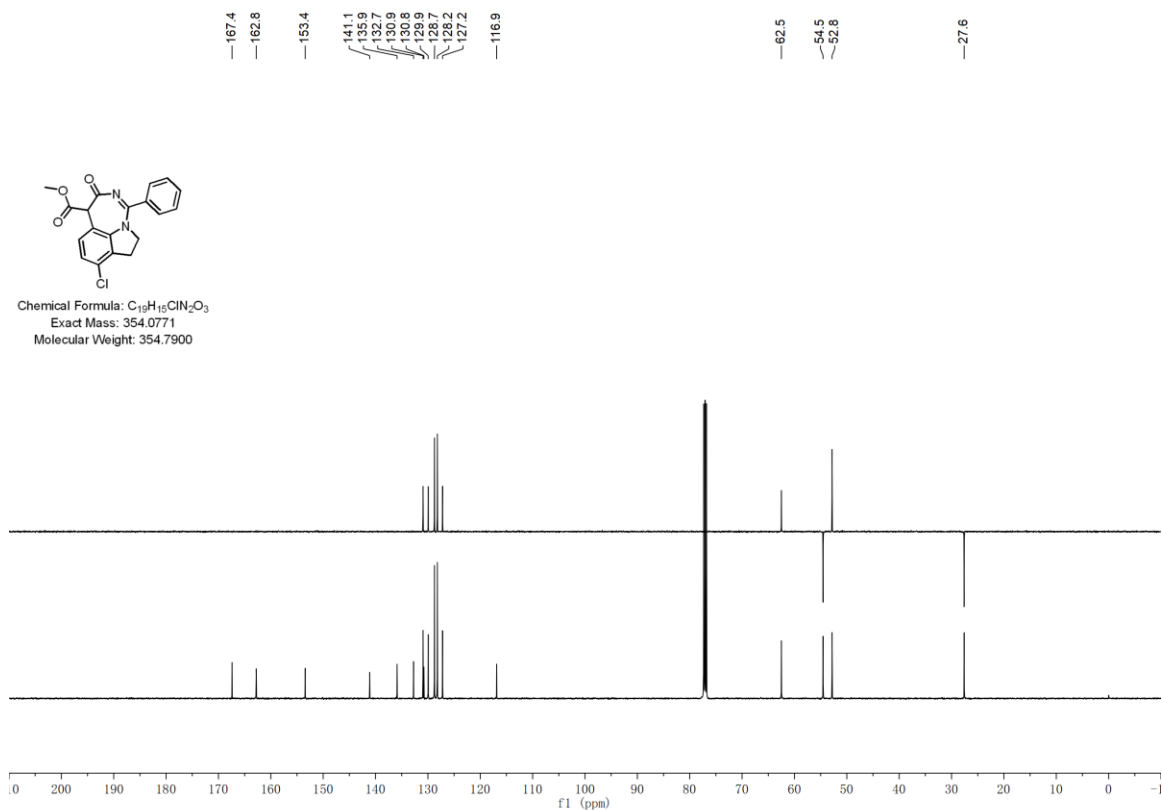

<sup>13</sup>C NMR spectrum of **3ca** (125 MHz, Chloroform-*d*)

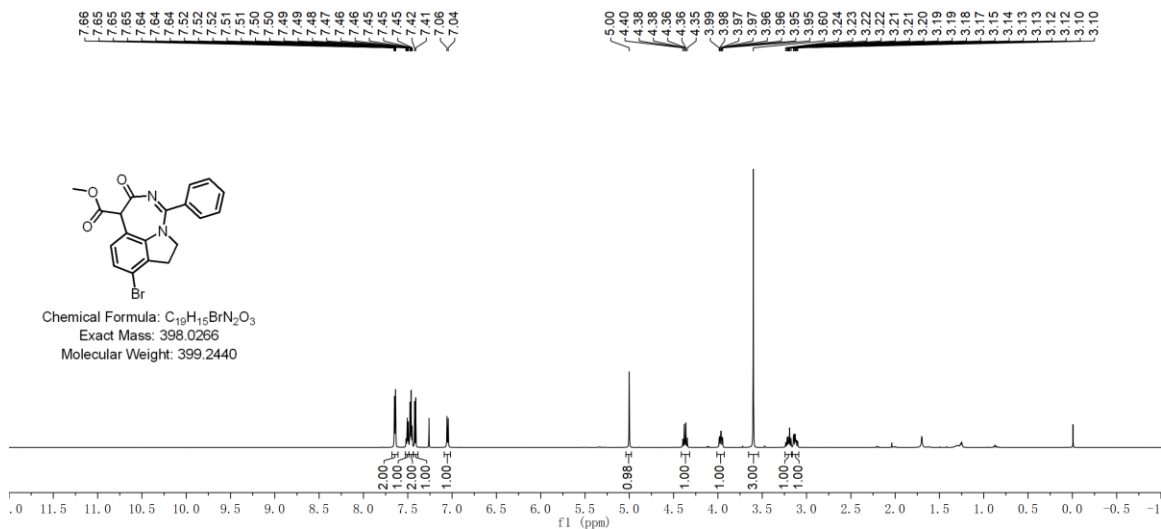

$^1H$  NMR spectrum of **3da** (600 MHz, Chloroform-*d*)

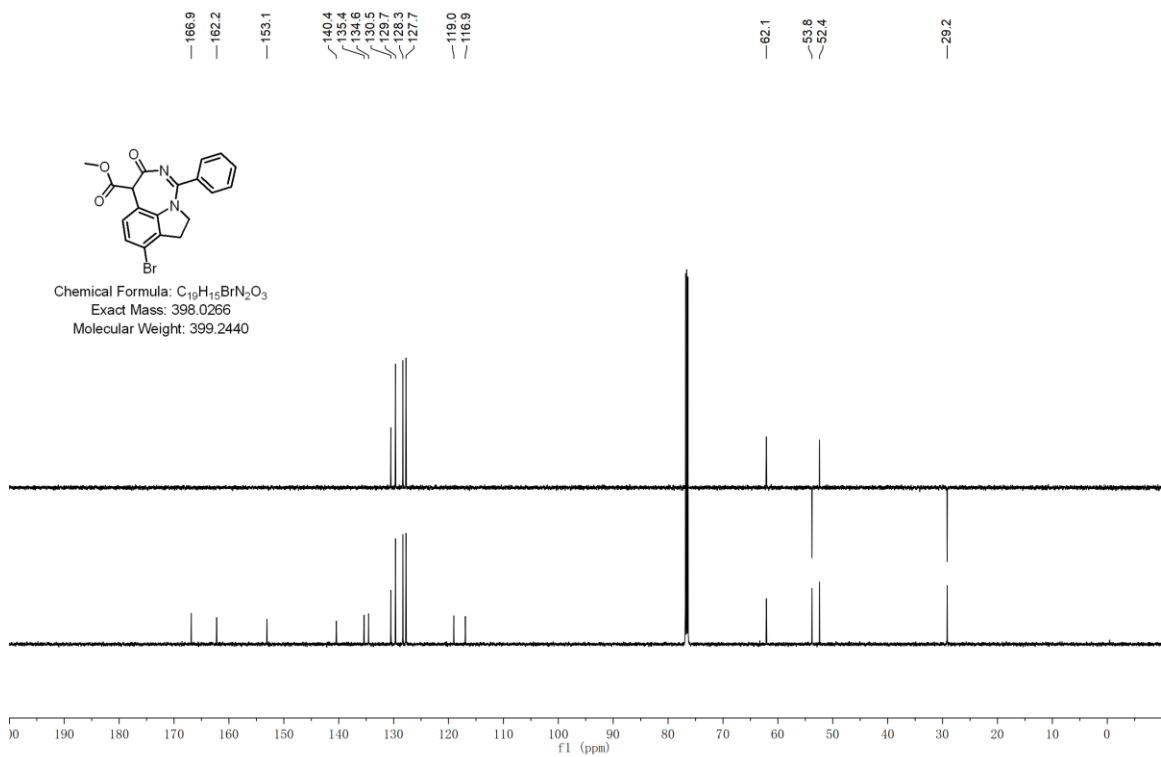

$^{13}C$  NMR spectrum of **3da** (150 MHz, Chloroform-*d*)

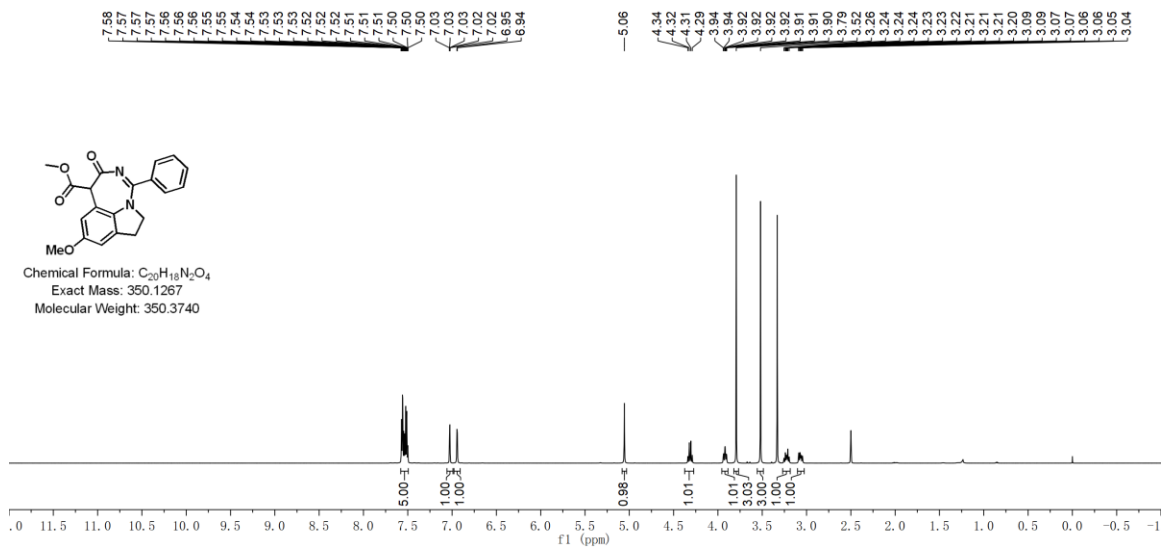

$^1\text{H}$  NMR spectrum of **3ea** (600 MHz,  $\text{DMSO-}d_6$ )

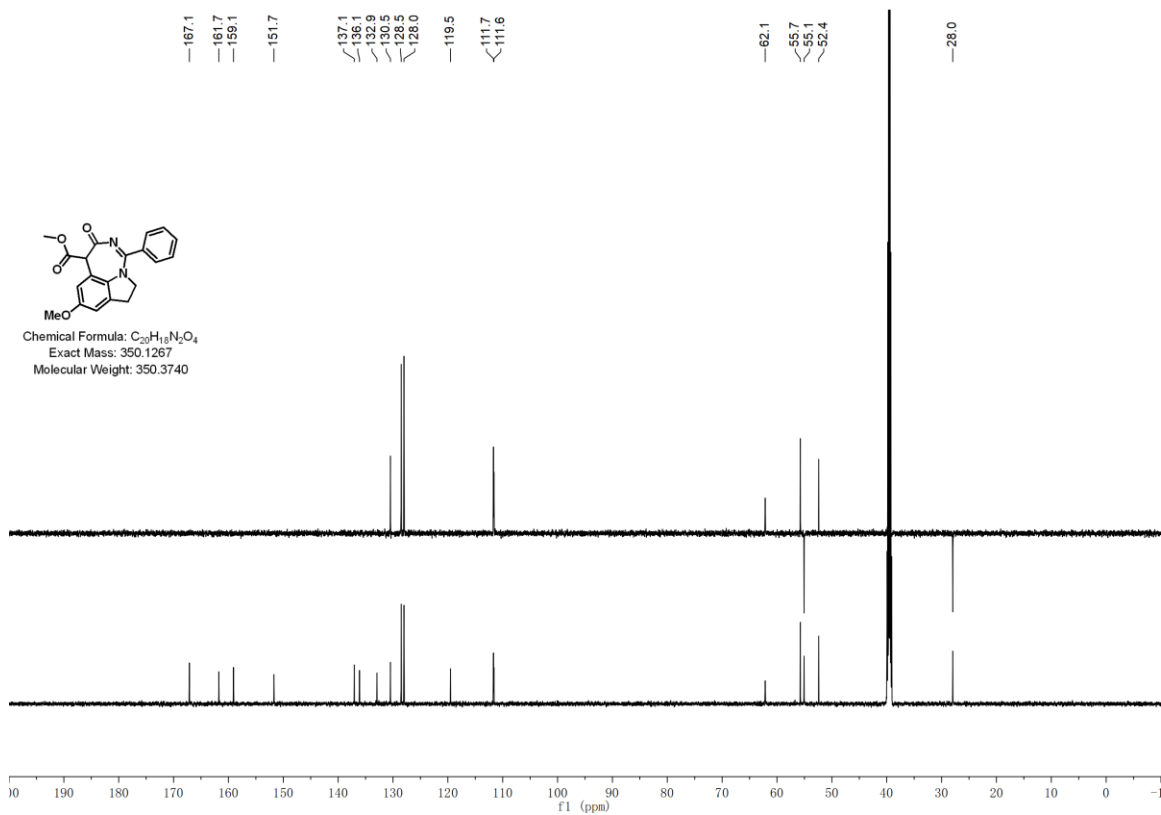

$^{13}\text{C}$  NMR spectrum of **3ea** (150 MHz,  $\text{DMSO-}d_6$ )

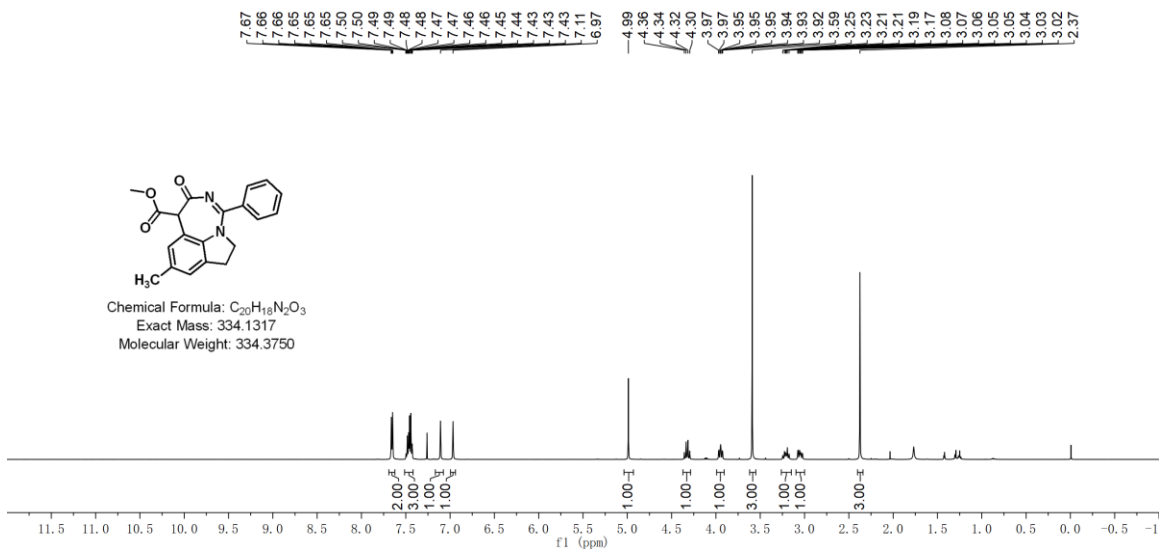

$^1\text{H}$  NMR spectrum of **3fa** (500 MHz, Chloroform-*d*)

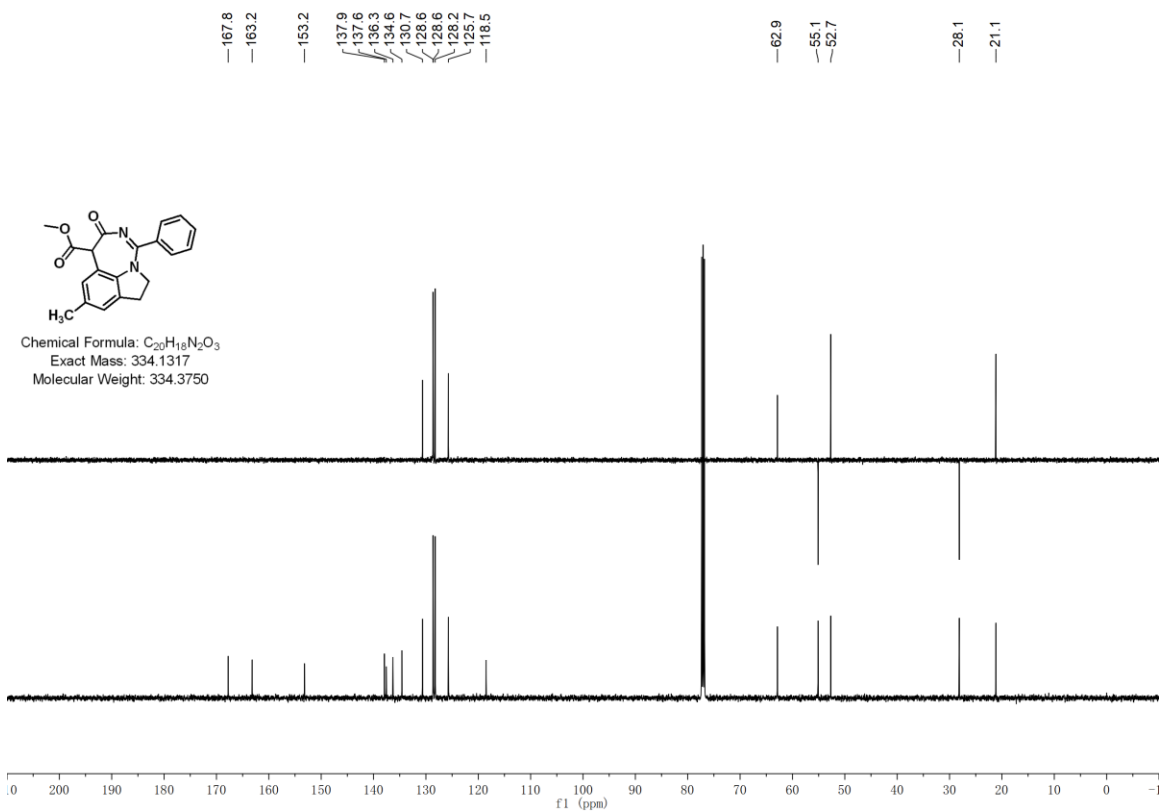

$^{13}\text{C}$  NMR spectrum of **3fa** (125 MHz, Chloroform-*d*)

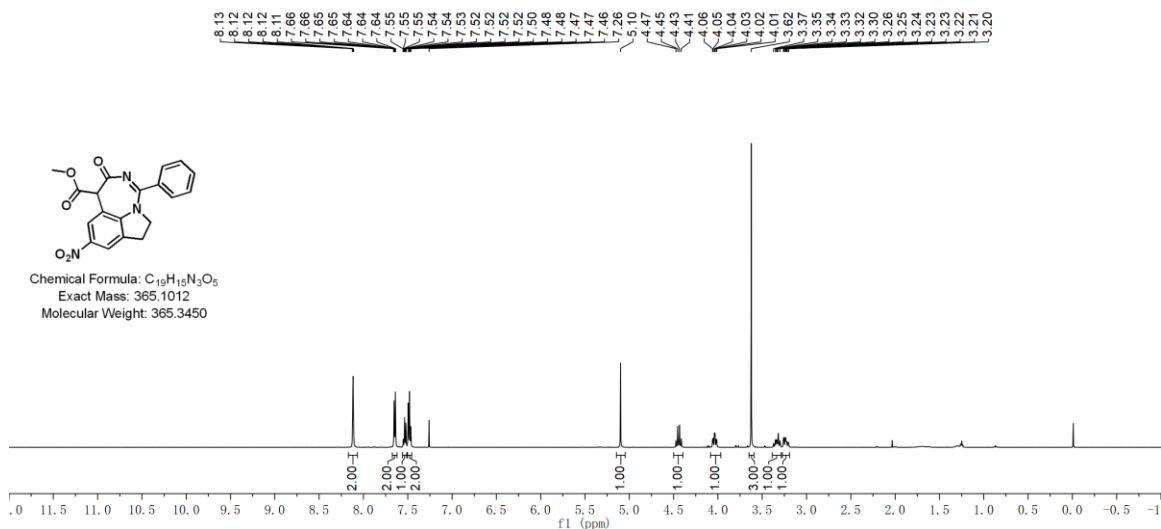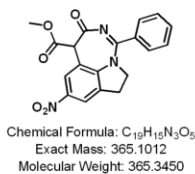

<sup>1</sup>H NMR spectrum of **3ga** (500 MHz, Chloroform-*d*)

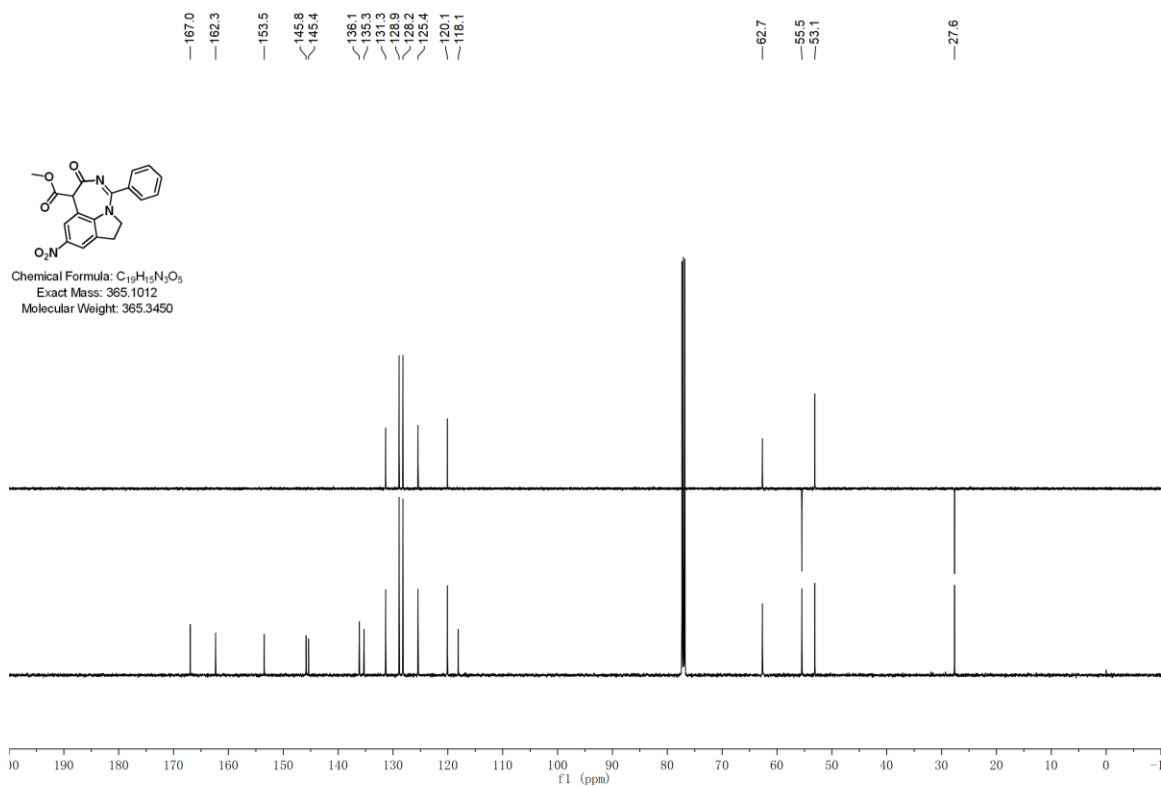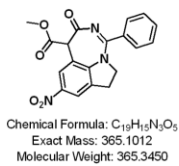

<sup>13</sup>C NMR spectrum of **3ga** (125 MHz, Chloroform-*d*)

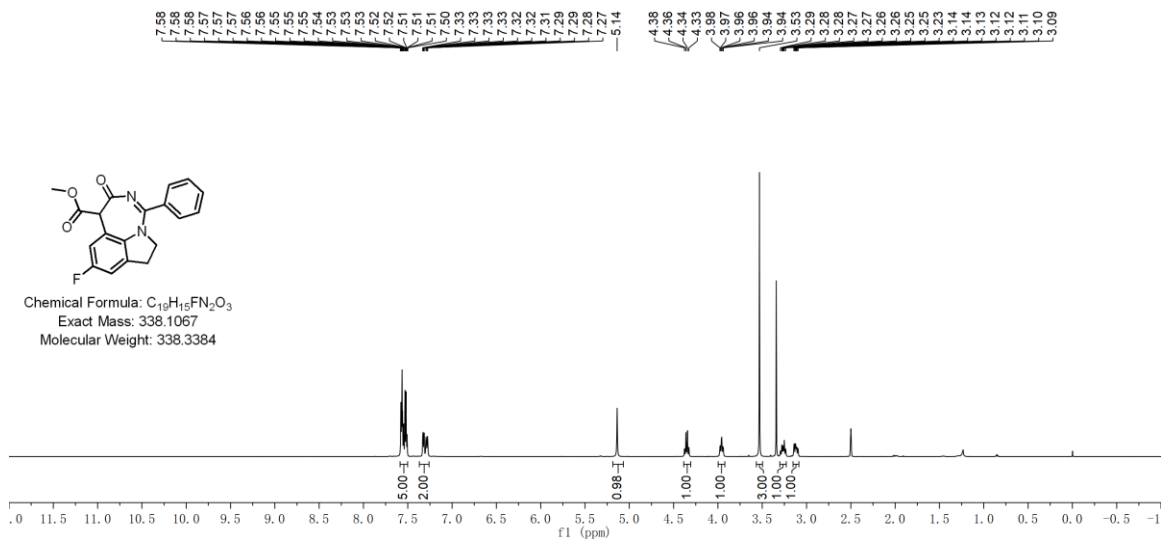

<sup>1</sup>H NMR spectrum of **3ha** (600 MHz, DMSO-*d*<sub>6</sub>)

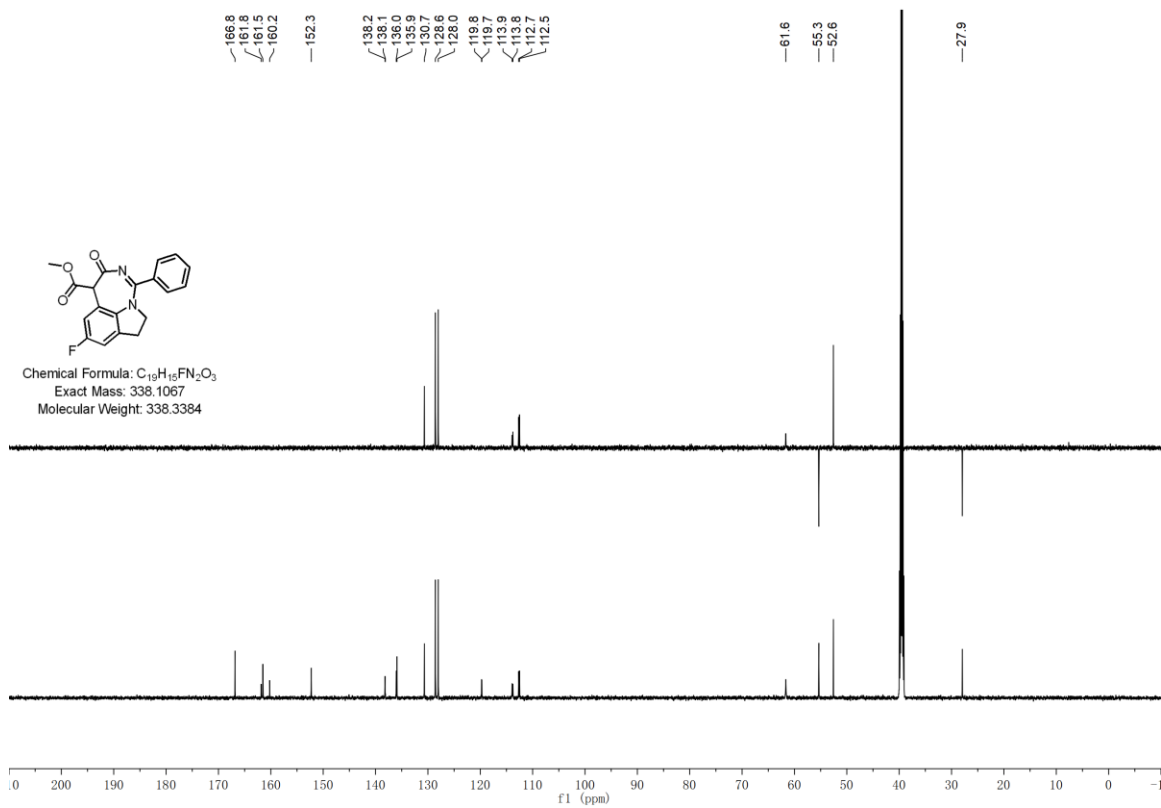

<sup>13</sup>C NMR spectrum of **3ha** (150 MHz, DMSO-*d*<sub>6</sub>)

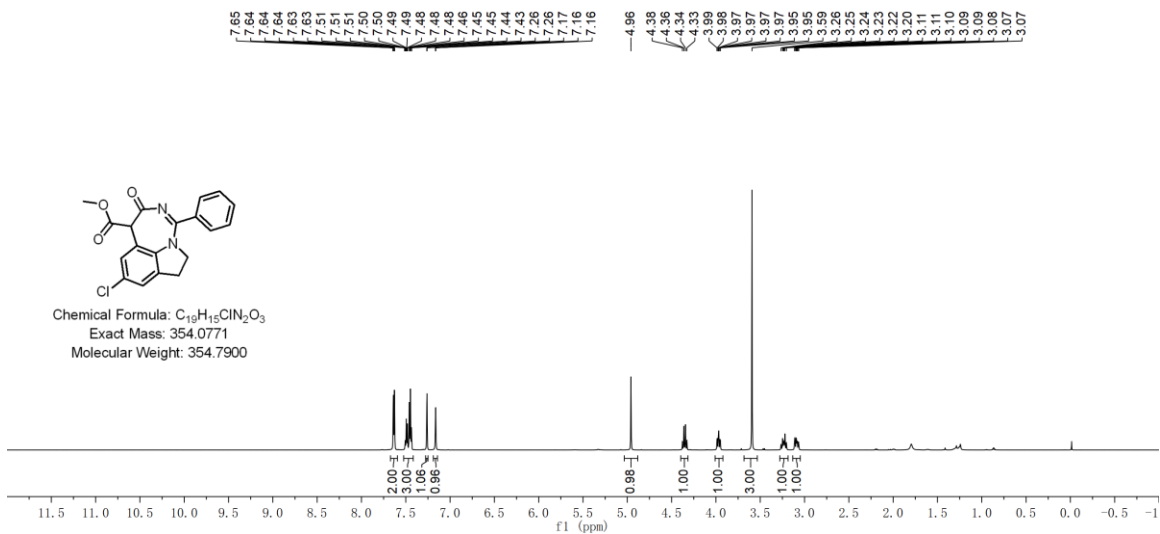

$^1H$  NMR spectrum of **3ia** (600 MHz, Chloroform-*d*)

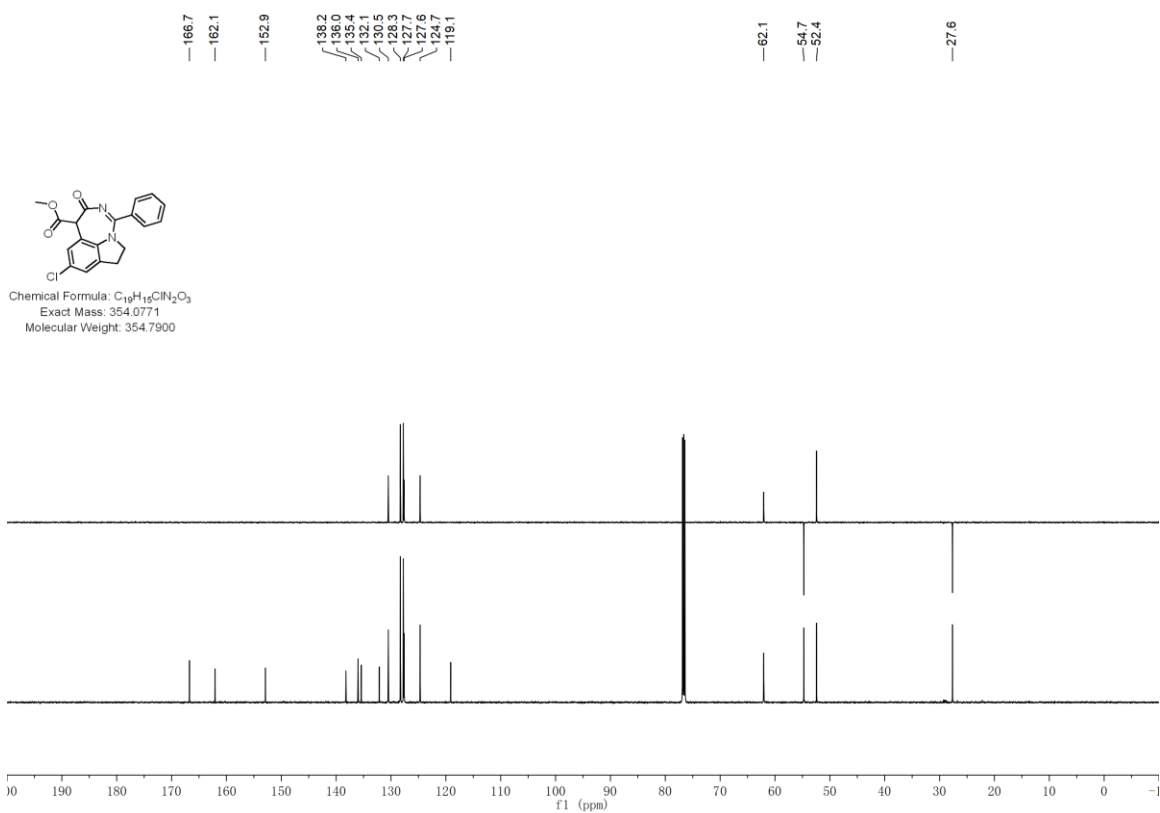

$^{13}C$  NMR spectrum of **3ia** (150 MHz, Chloroform-*d*)

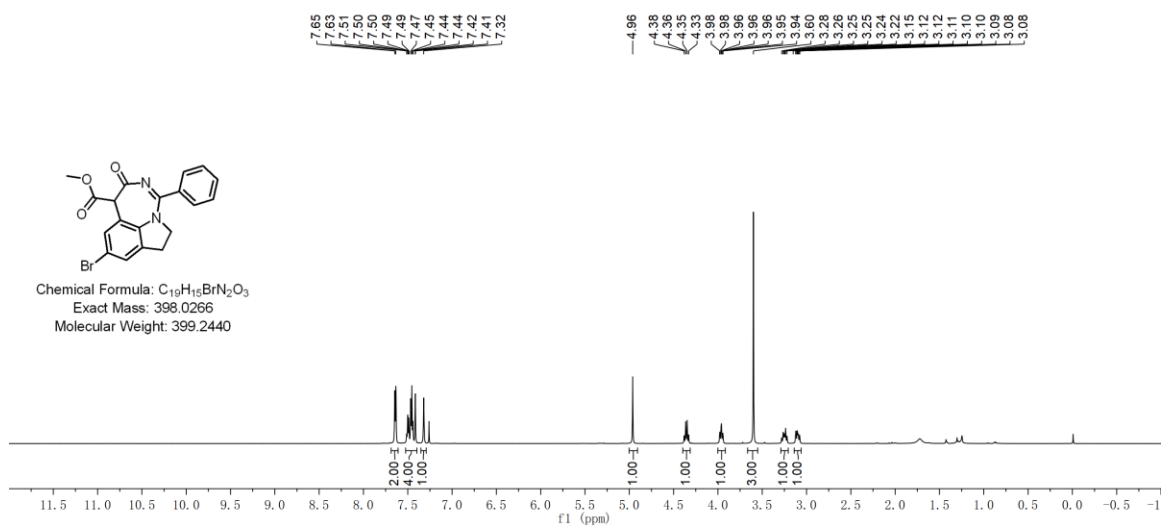

$^1H$  NMR spectrum of **3ja** (600 MHz, Chloroform-*d*)

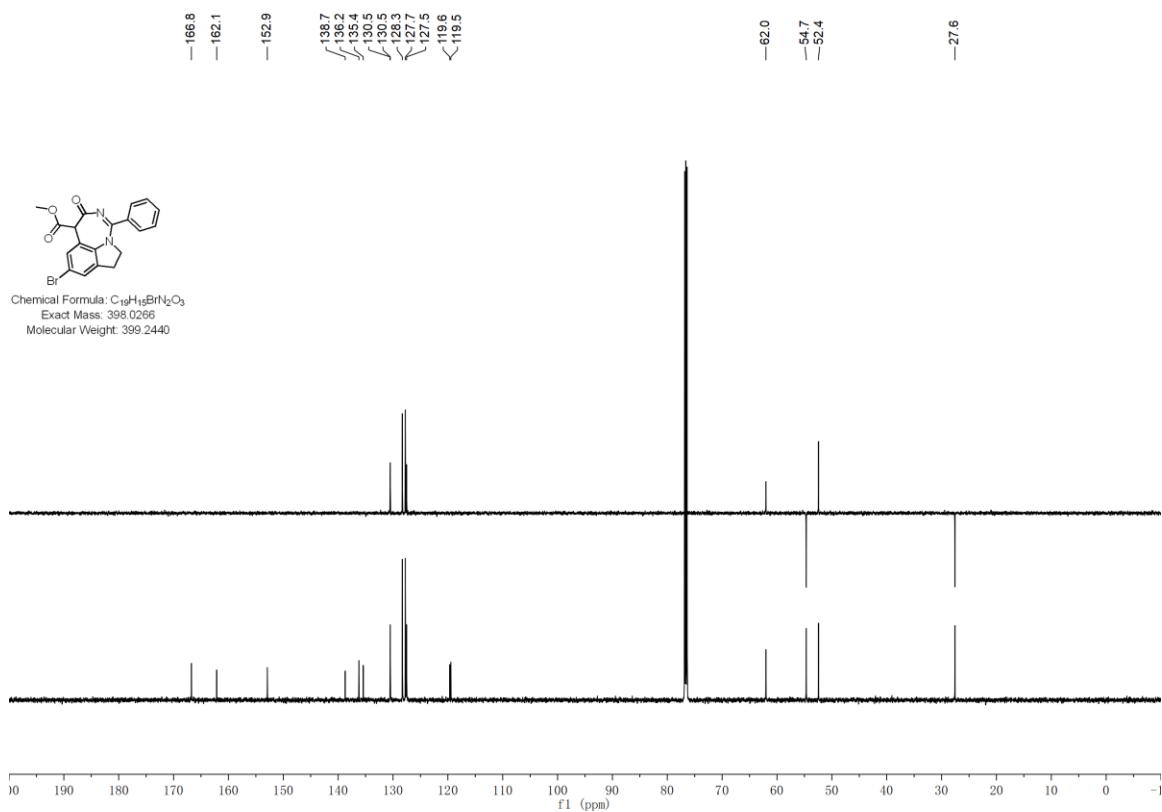

$^{13}C$  NMR spectrum of **3ja** (150 MHz, Chloroform-*d*)



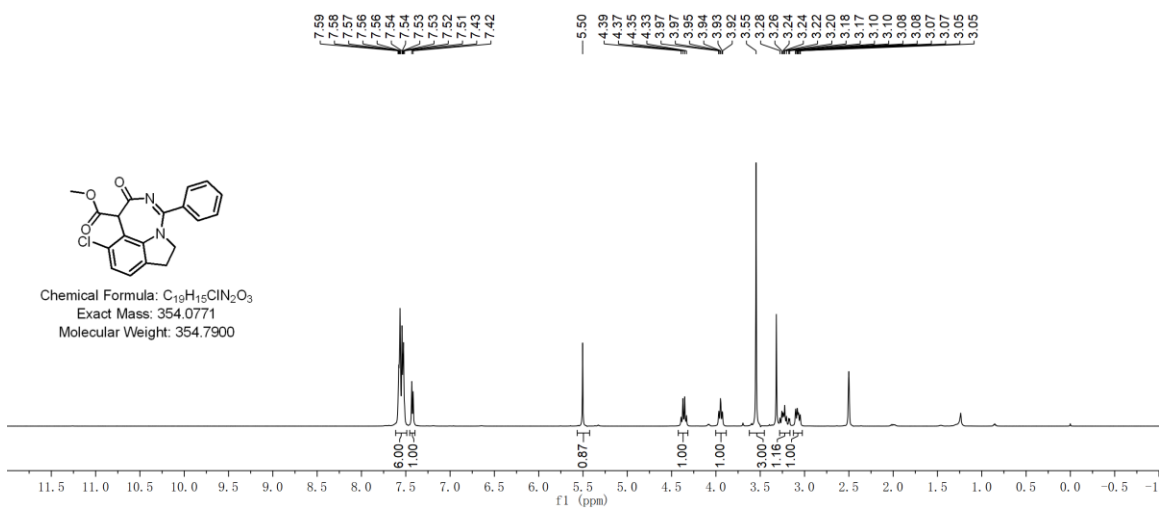

$^1H$  NMR spectrum of **3ka** (500 MHz,  $DMSO-d_6$ )

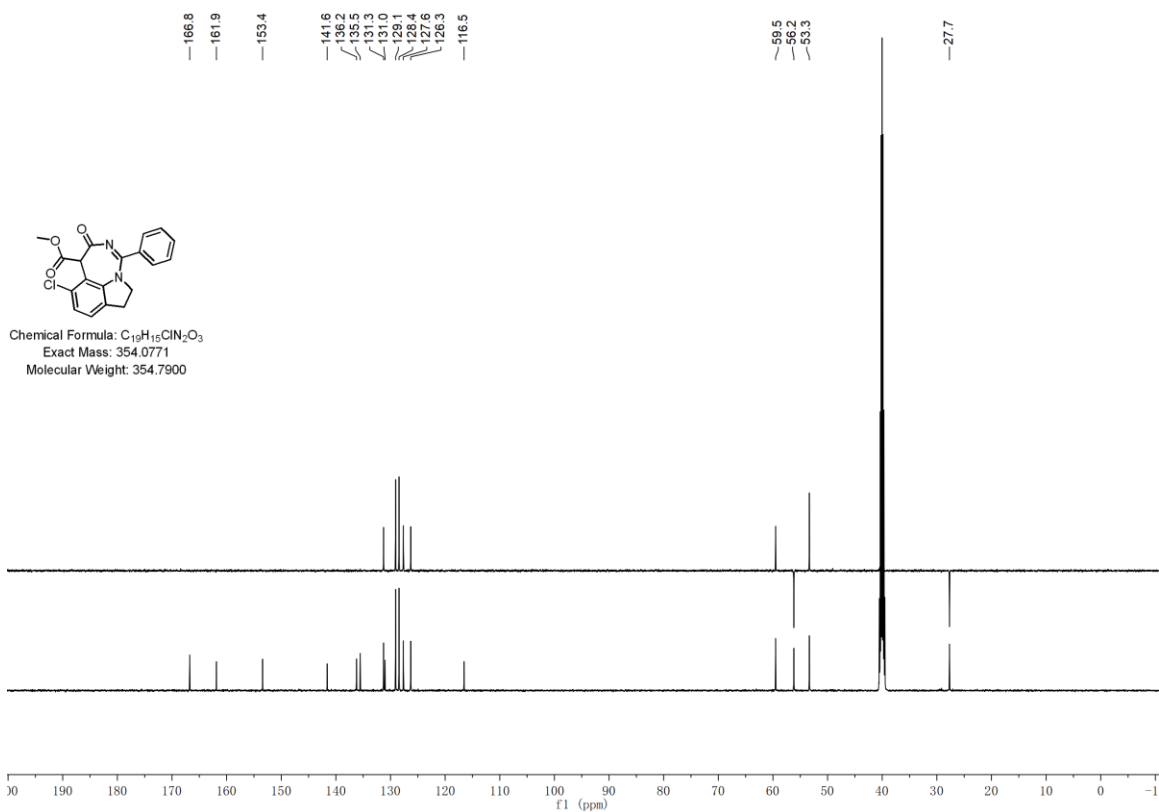

$^{13}C$  NMR spectrum of **3ka** (125 MHz,  $DMSO-d_6$ )

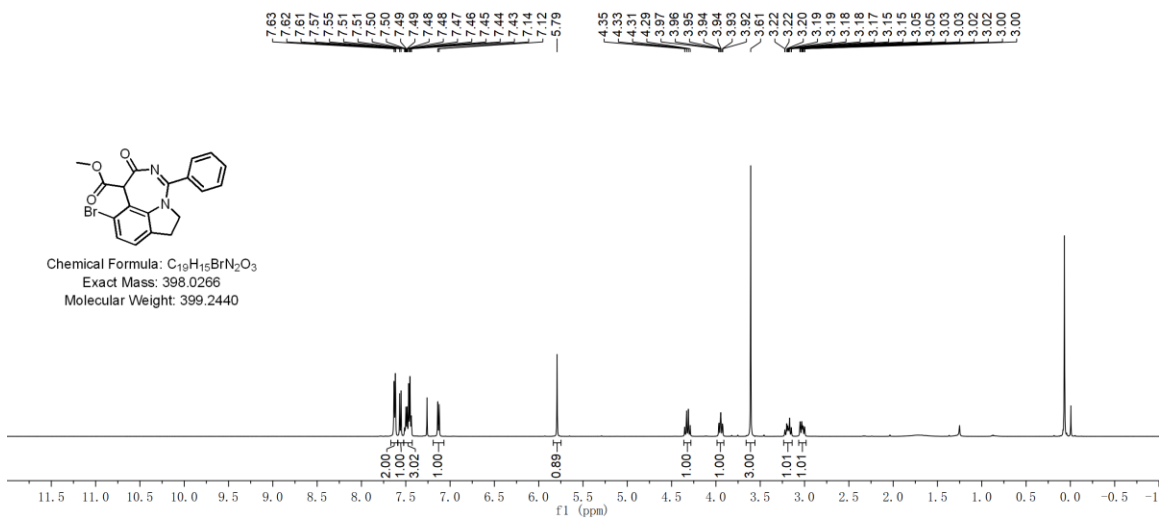

$^1H$  NMR spectrum of **3la** (500 MHz, Chloroform-*d*)

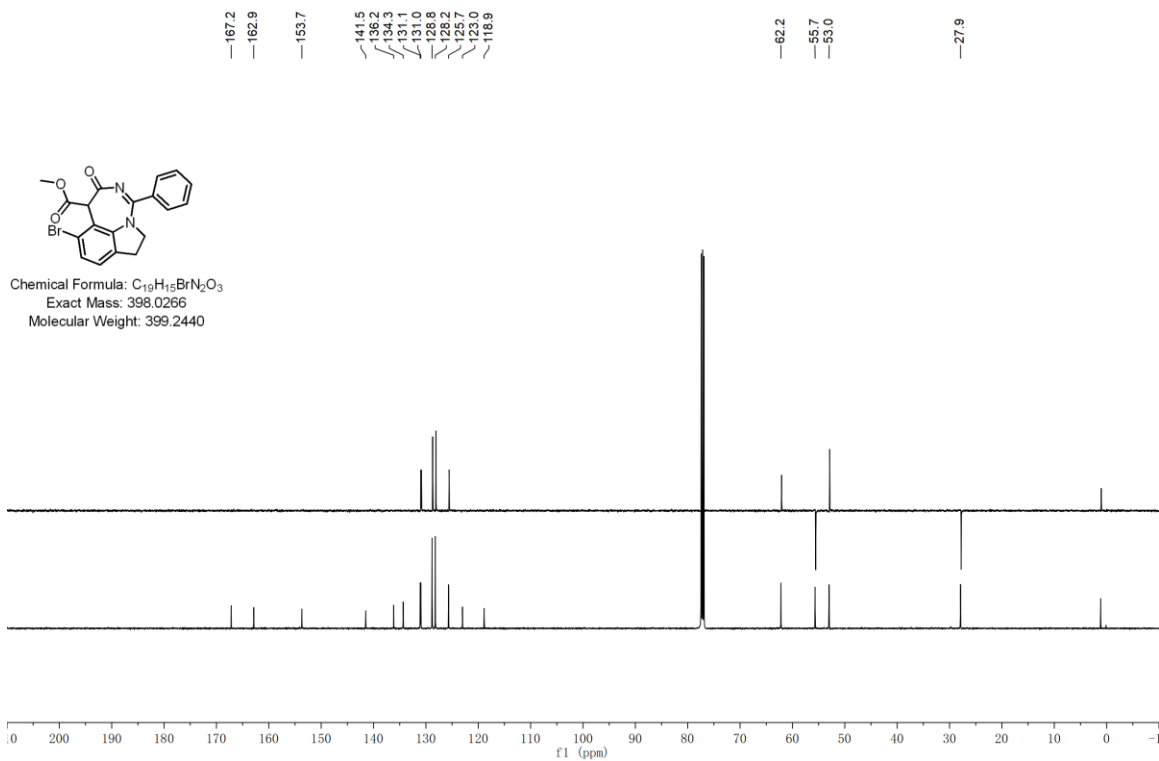

$^{13}C$  NMR spectrum of **3la** (125 MHz, Chloroform-*d*)

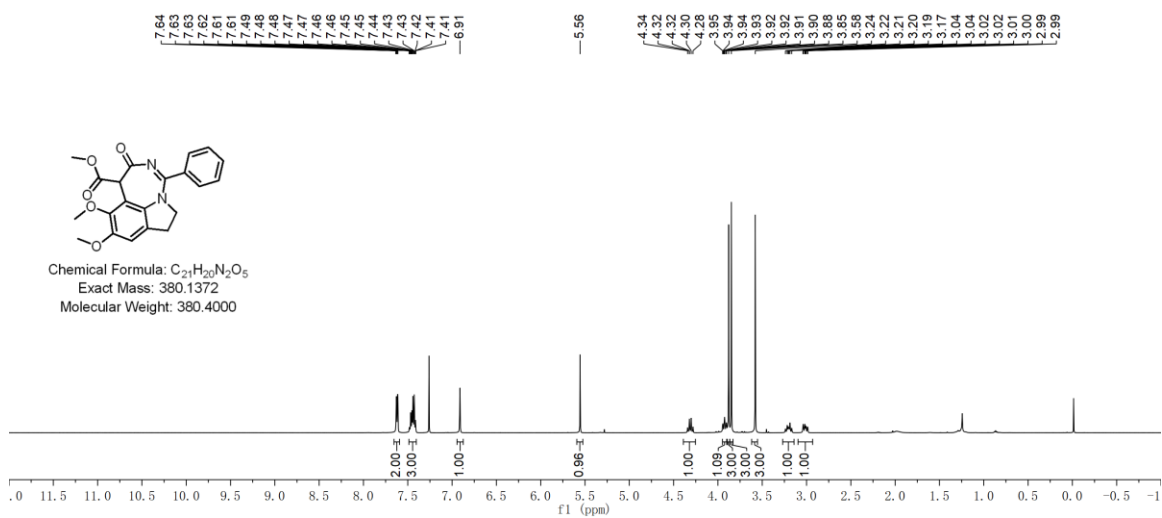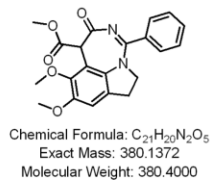

$^1\text{H}$  NMR spectrum of **3ma** (500 MHz, Chloroform-*d*)

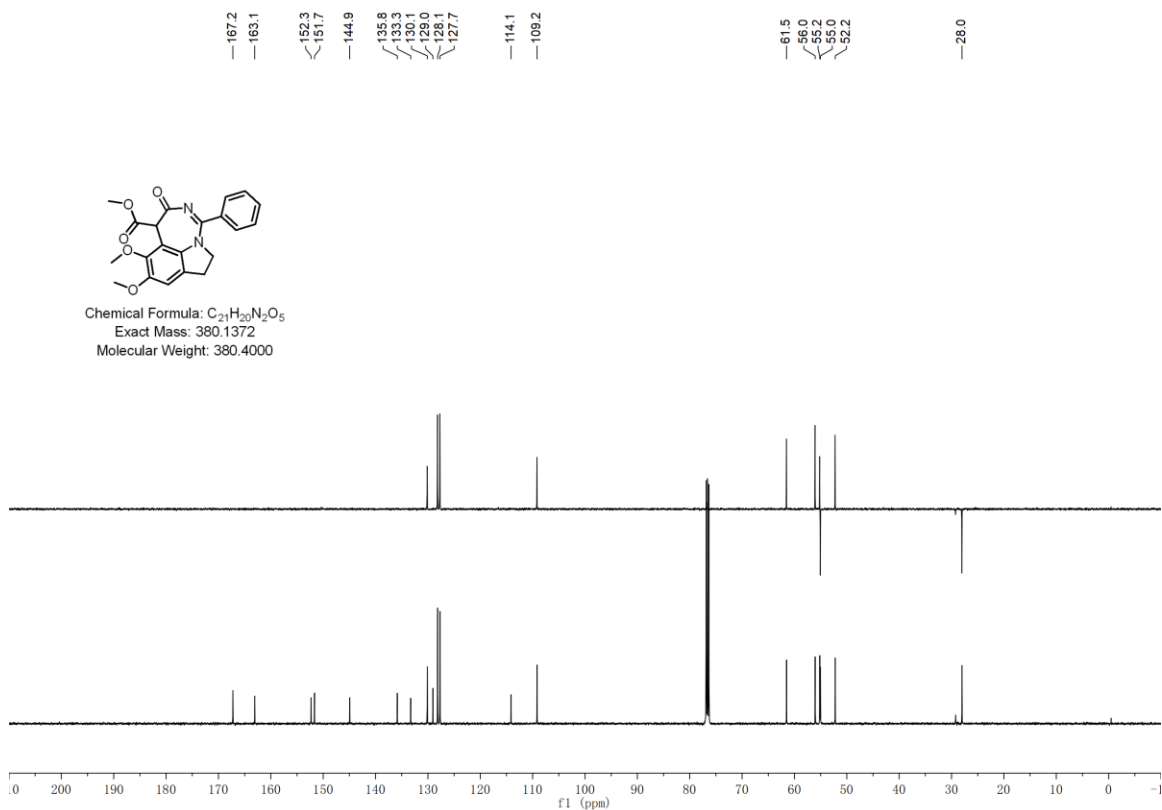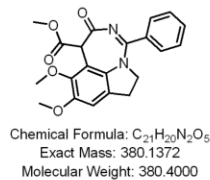

$^{13}\text{C}$  NMR spectrum of **3ma** (125 MHz, Chloroform-*d*)

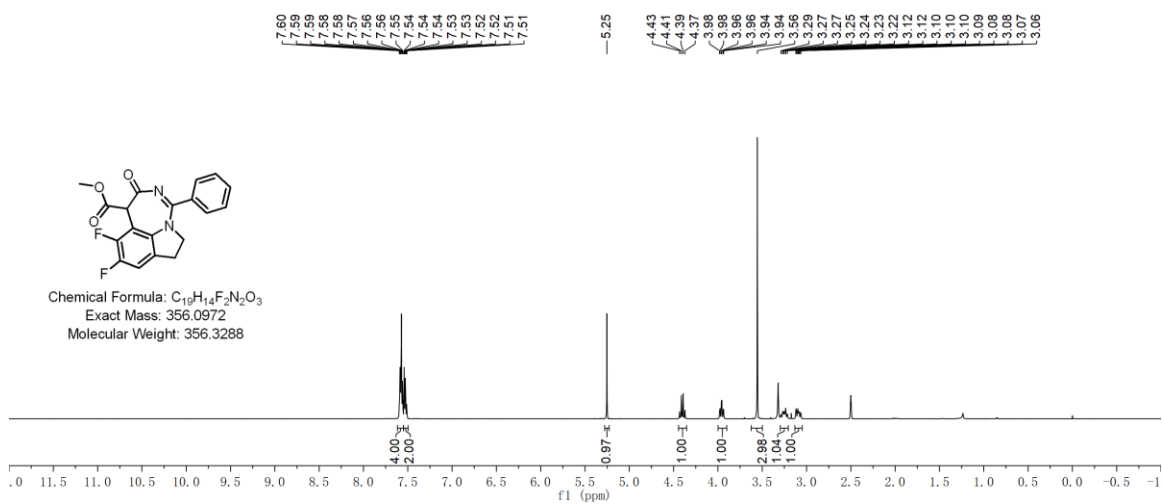

$^1\text{H}$  NMR spectrum of **3na** (500 MHz,  $\text{DMSO-}d_6$ )

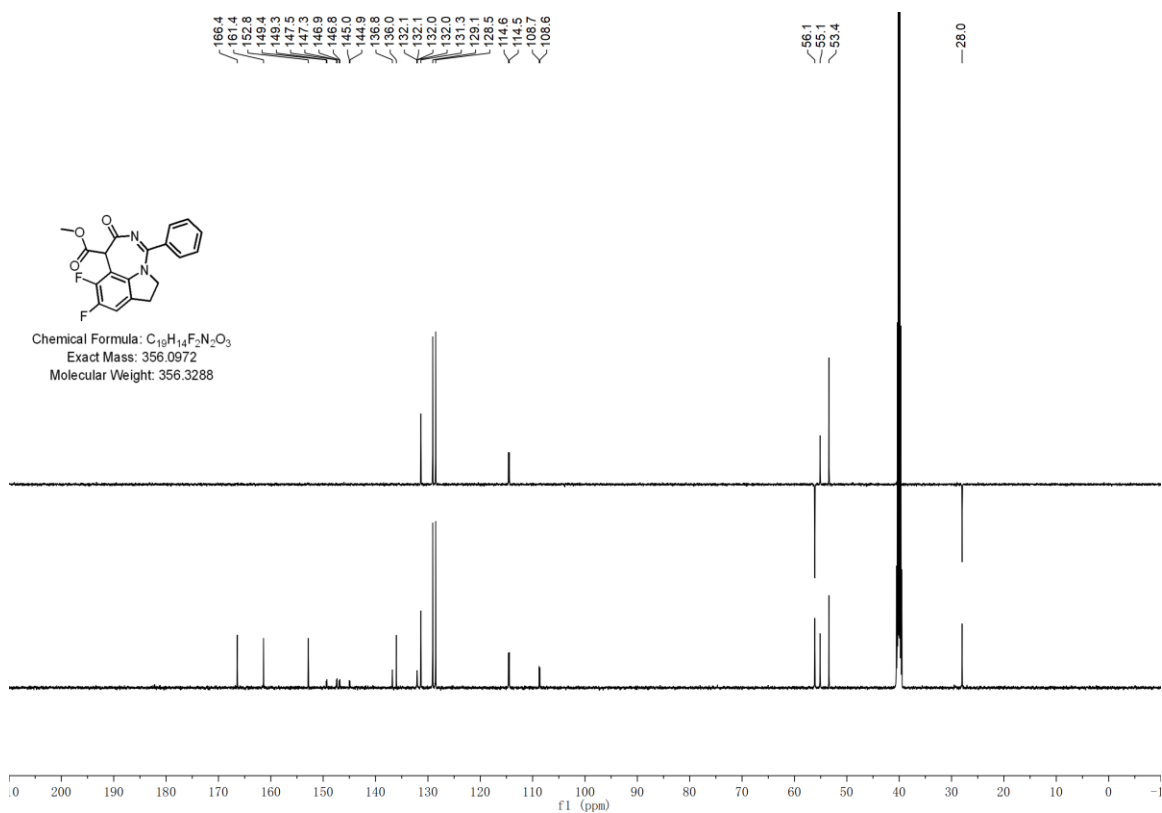

$^{13}\text{C}$  NMR spectrum of **3na** (125 MHz,  $\text{DMSO-}d_6$ )

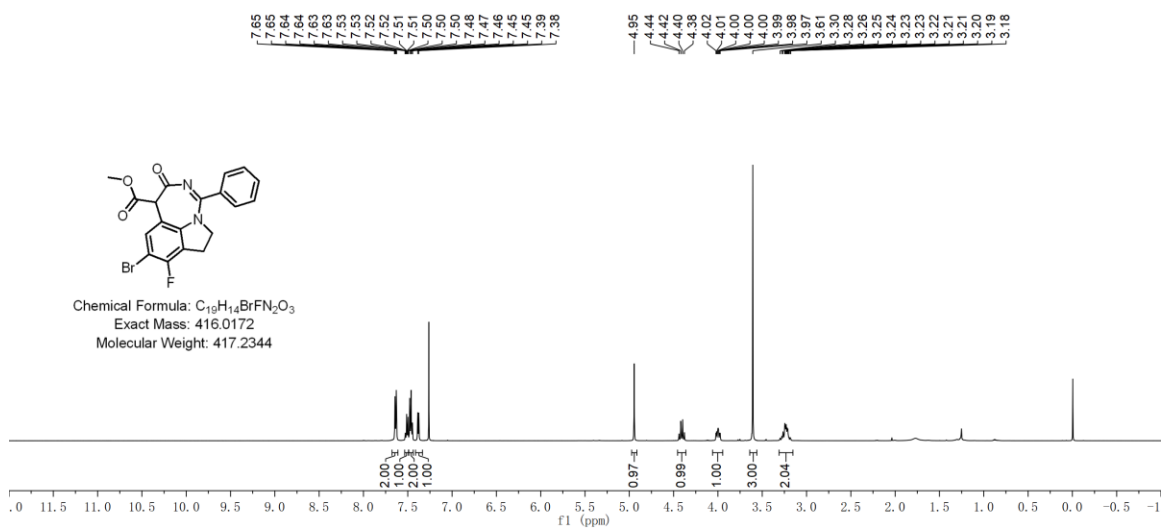

$^1H$  NMR spectrum of **30a** (500 MHz, Chloroform-*d*)

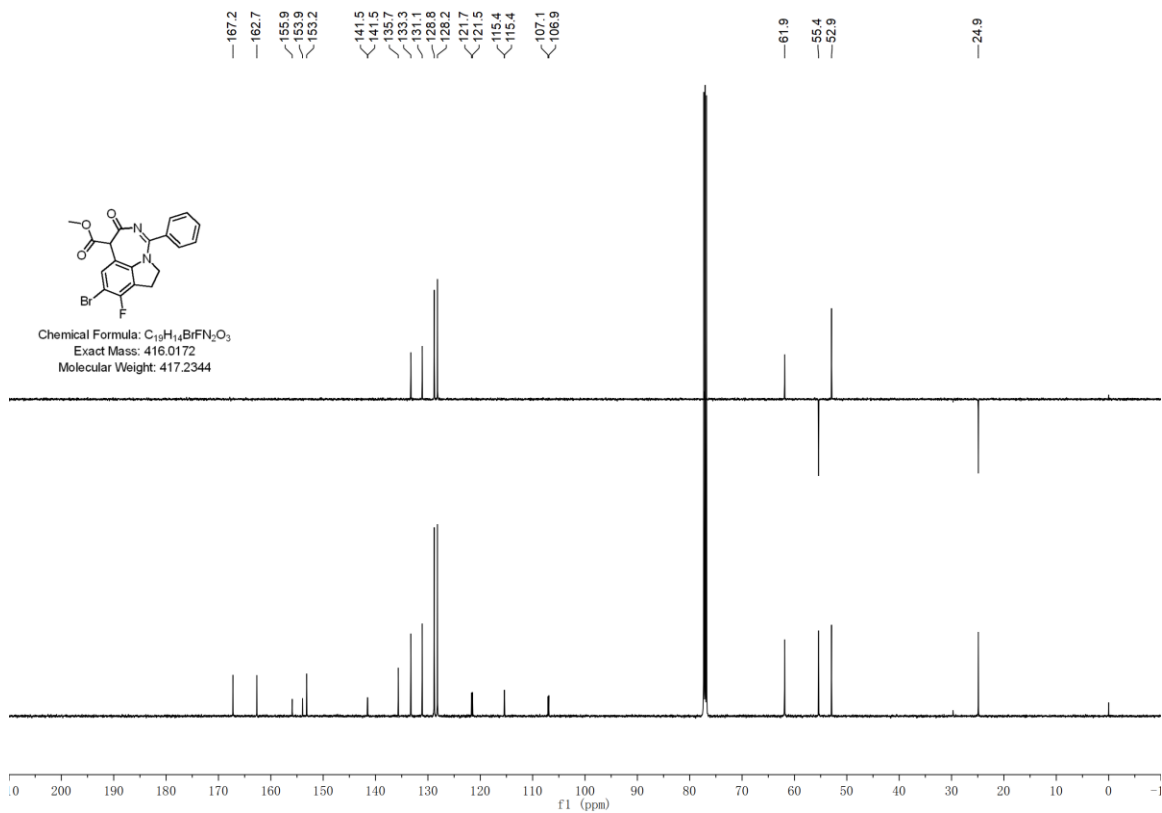

$^{13}C$  NMR spectrum of **30a** (125 MHz, Chloroform-*d*)

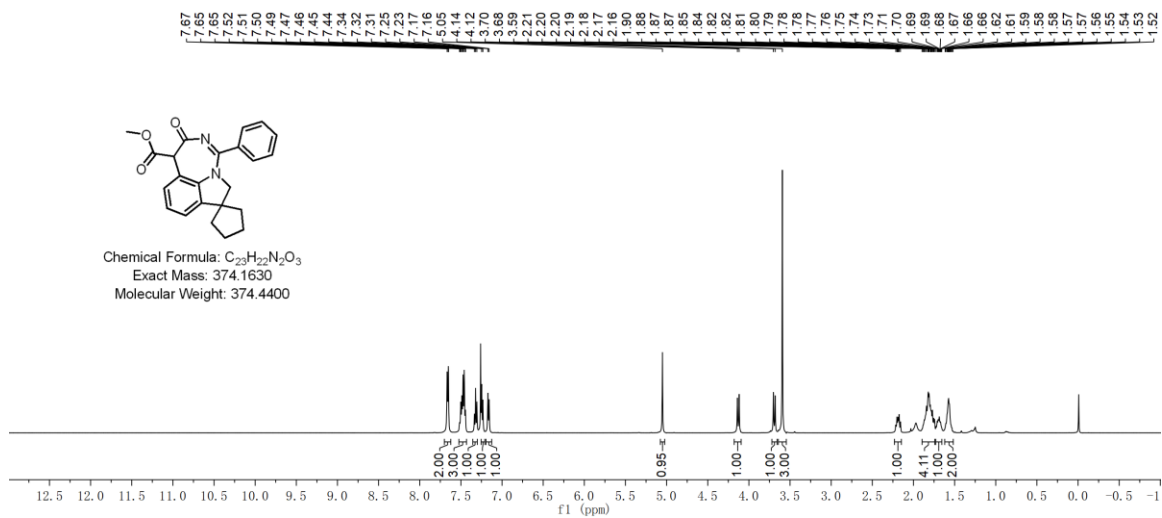

<sup>1</sup>H NMR spectrum of **3pa** (500 MHz, Chloroform-*d*)

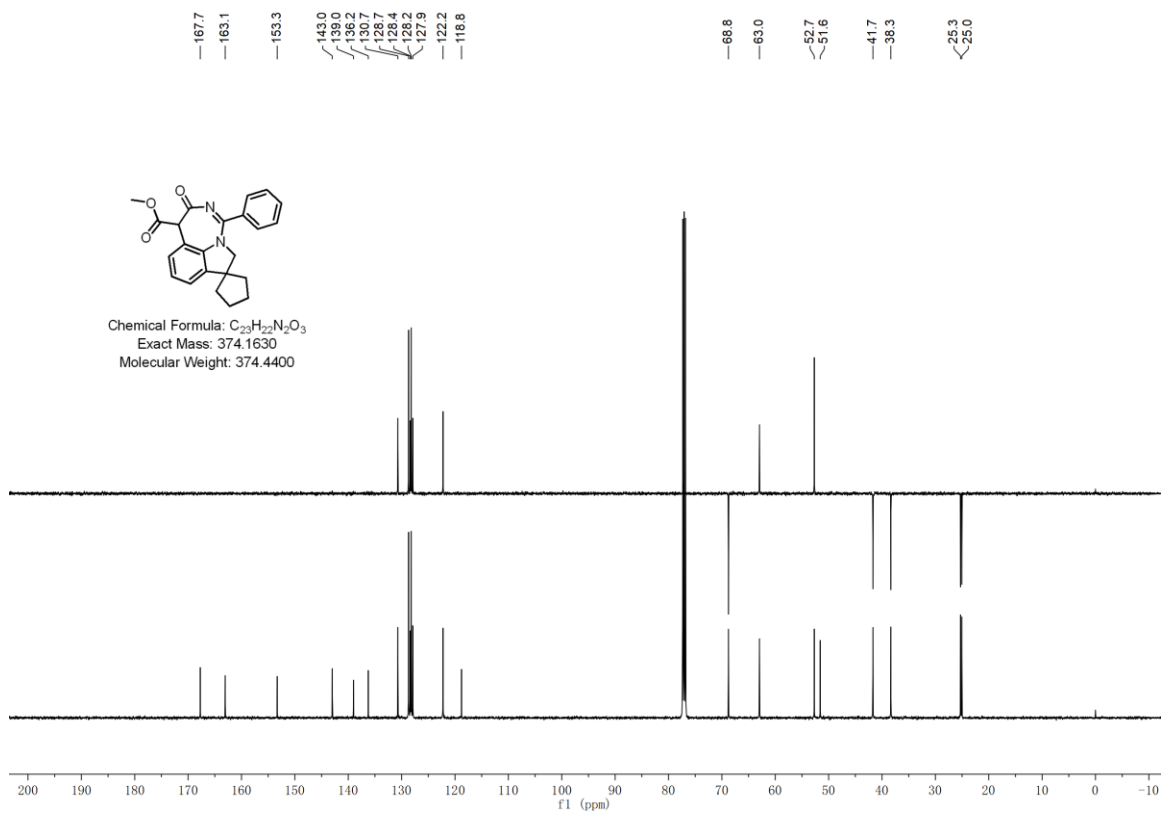

<sup>13</sup>C NMR spectrum of **3pa** (125 MHz, Chloroform-*d*)

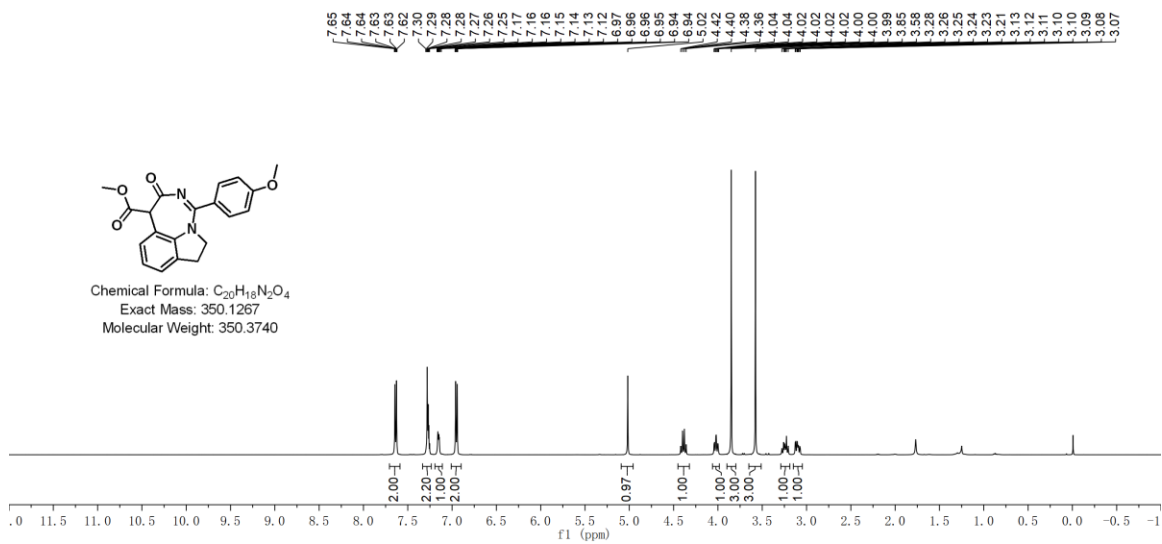

$^1\text{H}$  NMR spectrum of **3qa** (500 MHz, Chloroform-*d*)

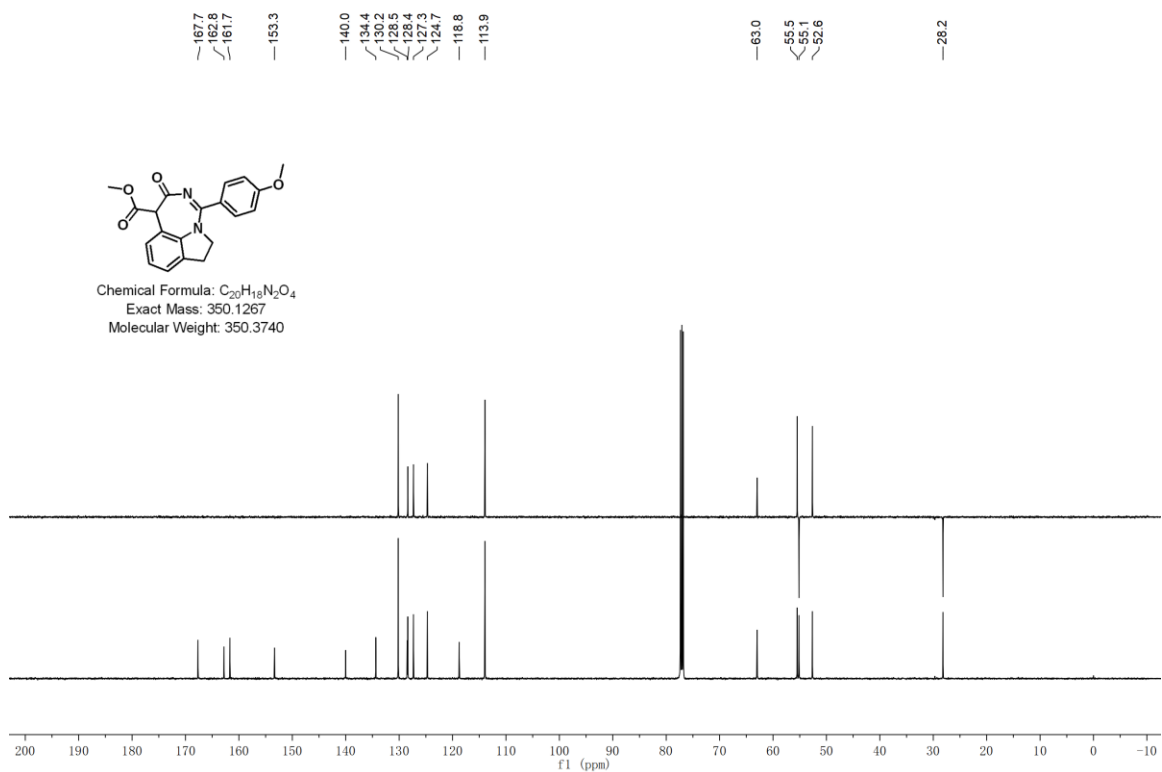

$^{13}\text{C}$  NMR spectrum of **3qa** (125 MHz, Chloroform-*d*)

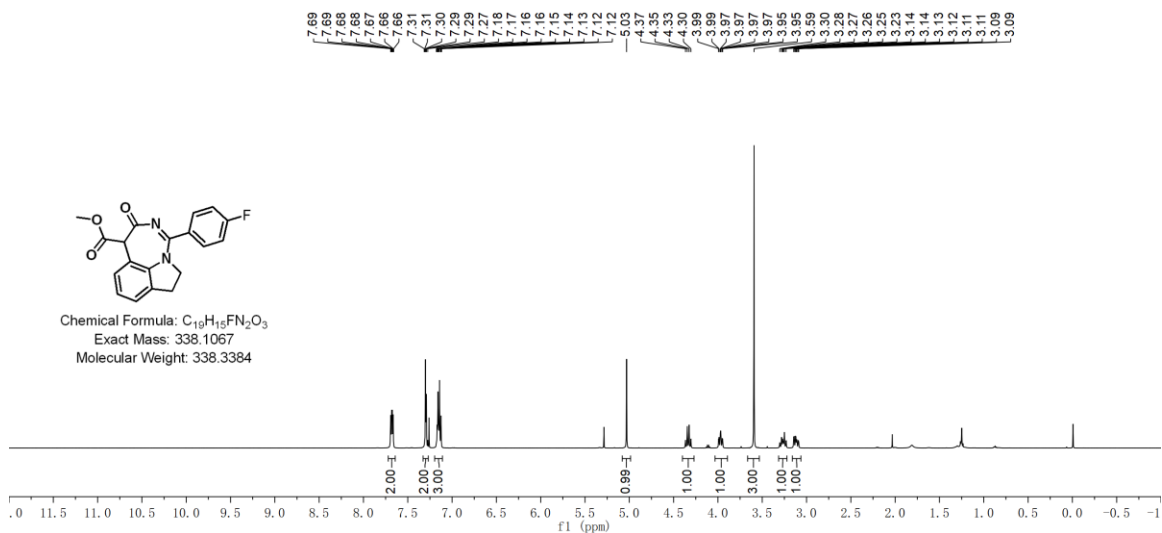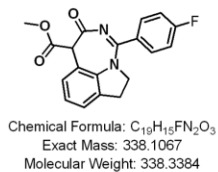

<sup>1</sup>H NMR spectrum of **3ra** (500 MHz, Chloroform-*d*)

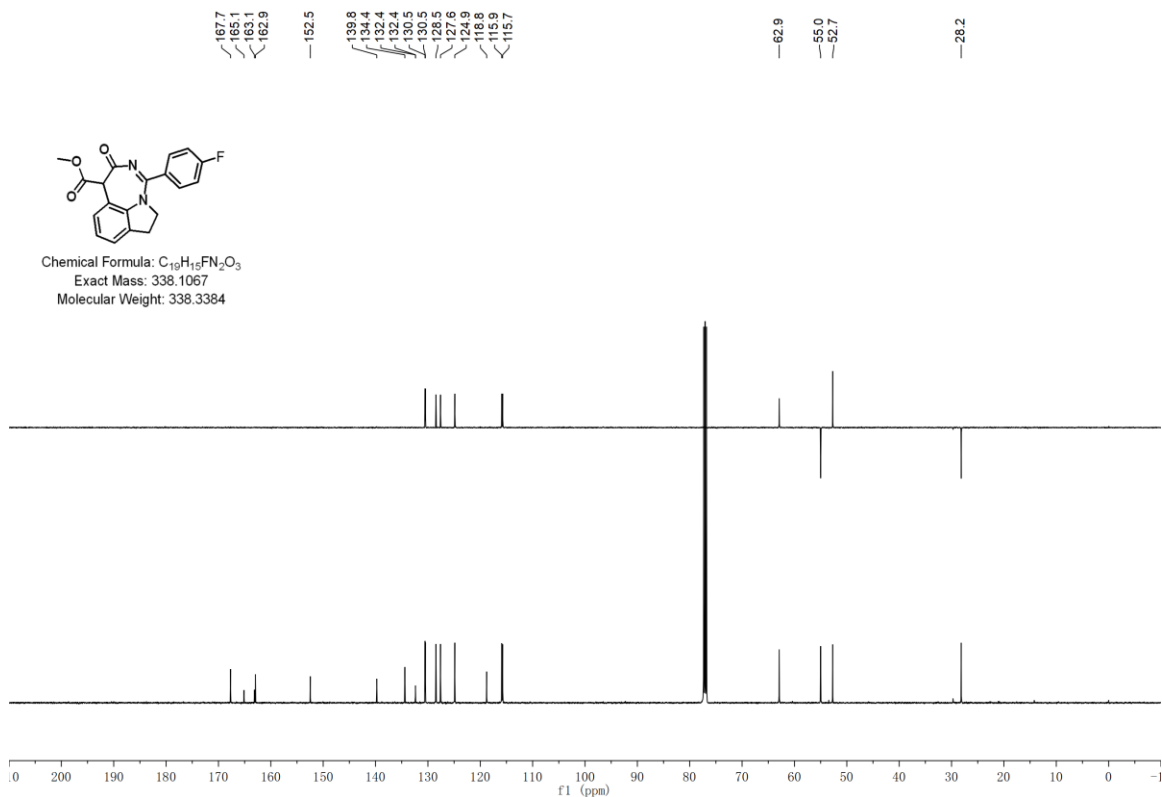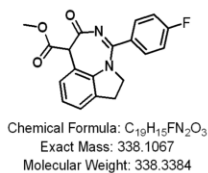

<sup>13</sup>C NMR spectrum of **3ra** (125 MHz, Chloroform-*d*)



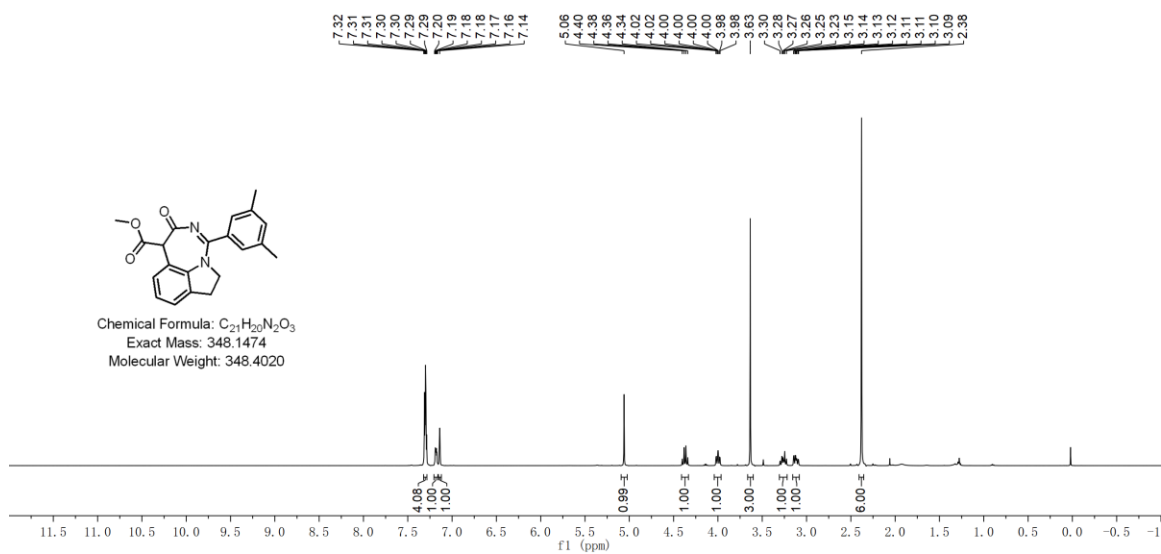

<sup>1</sup>H NMR spectrum of **3sa** (500 MHz, Chloroform-*d*)

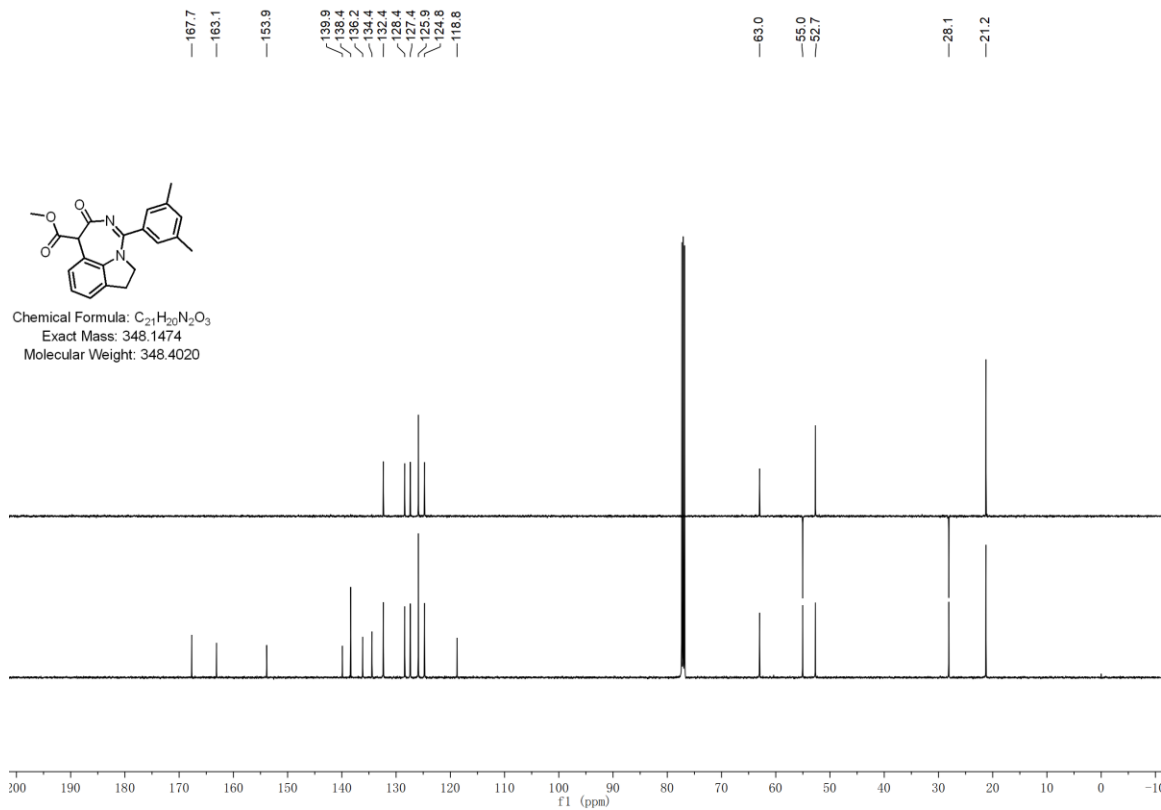

<sup>13</sup>C NMR spectrum of **3sa** (125 MHz, Chloroform-*d*)

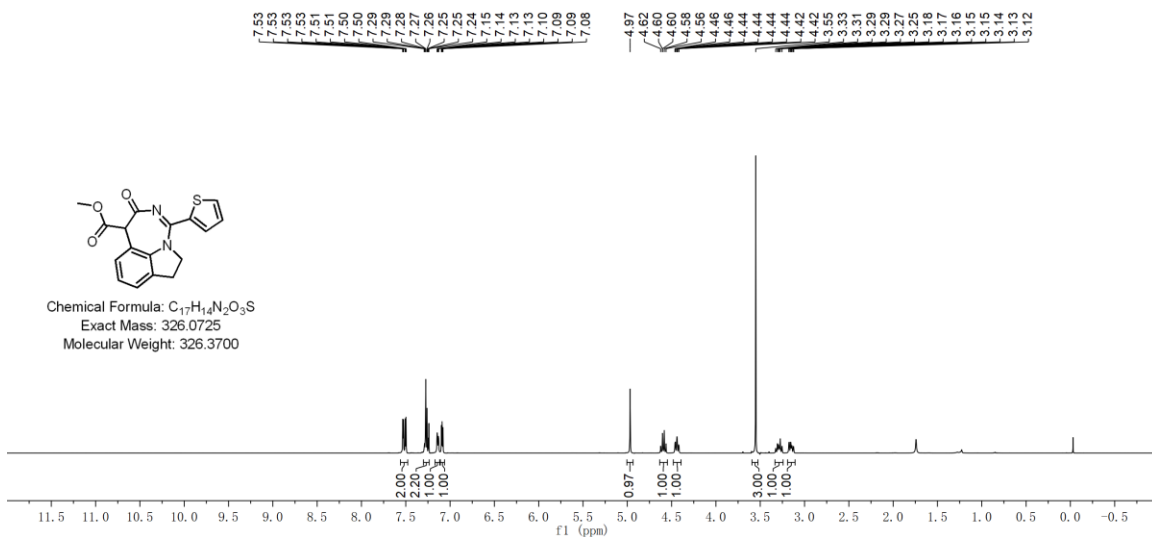

$^1H$  NMR spectrum of **3ta** (500 MHz, Chloroform-*d*)

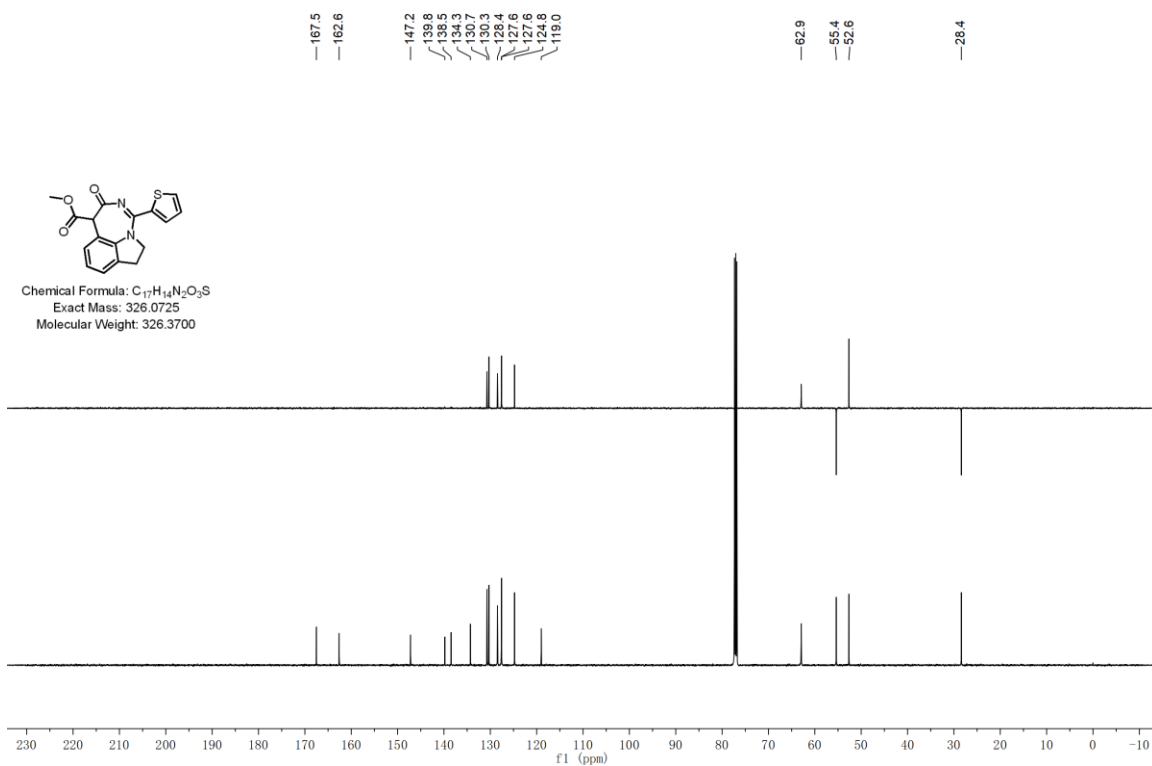

$^{13}C$  NMR spectrum of **3ta** (125 MHz, Chloroform-*d*)

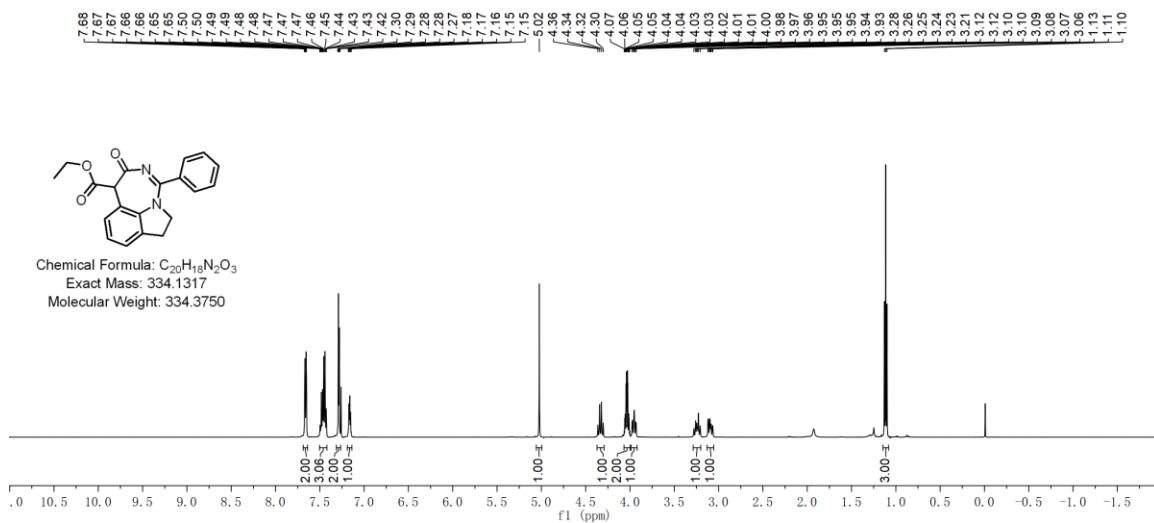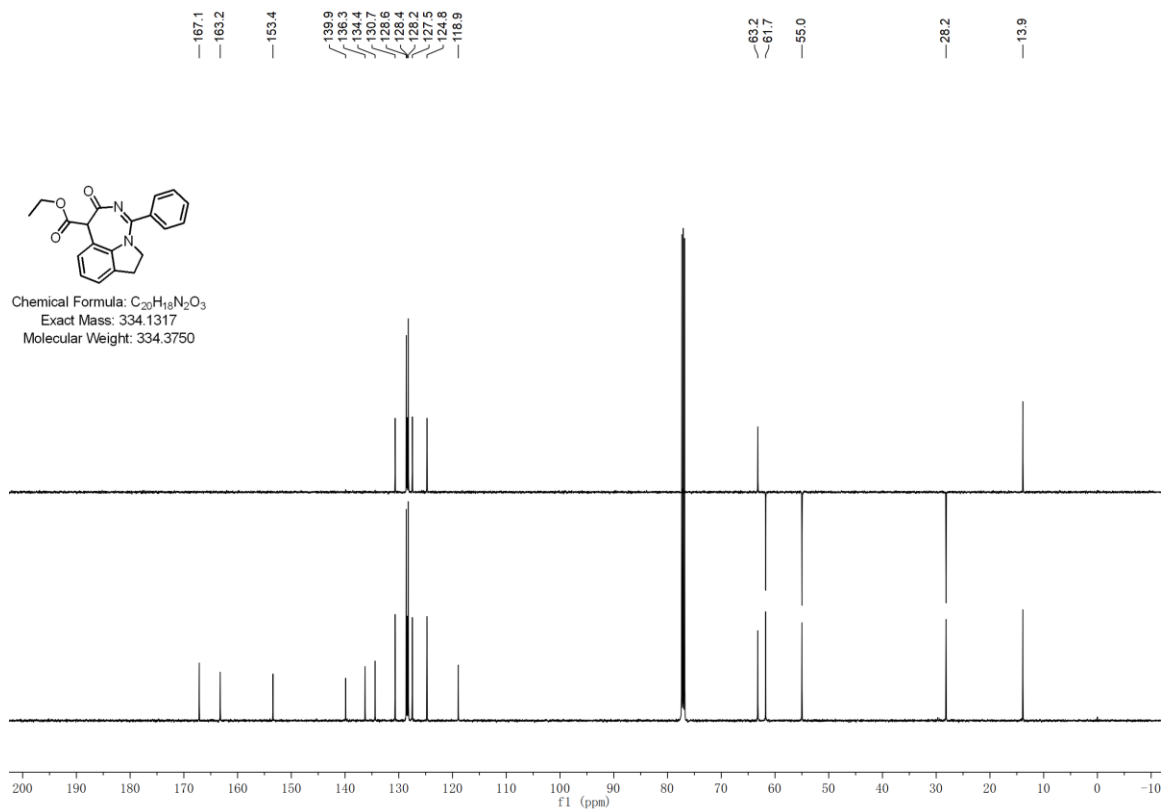

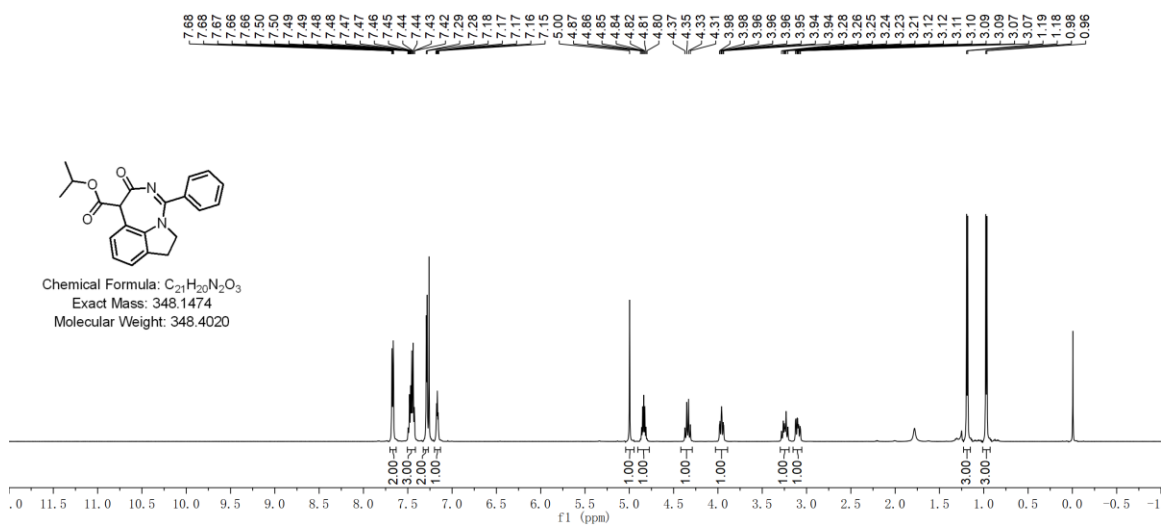

$^1H$  NMR spectrum of **3ac** (500 MHz, Chloroform-*d*)

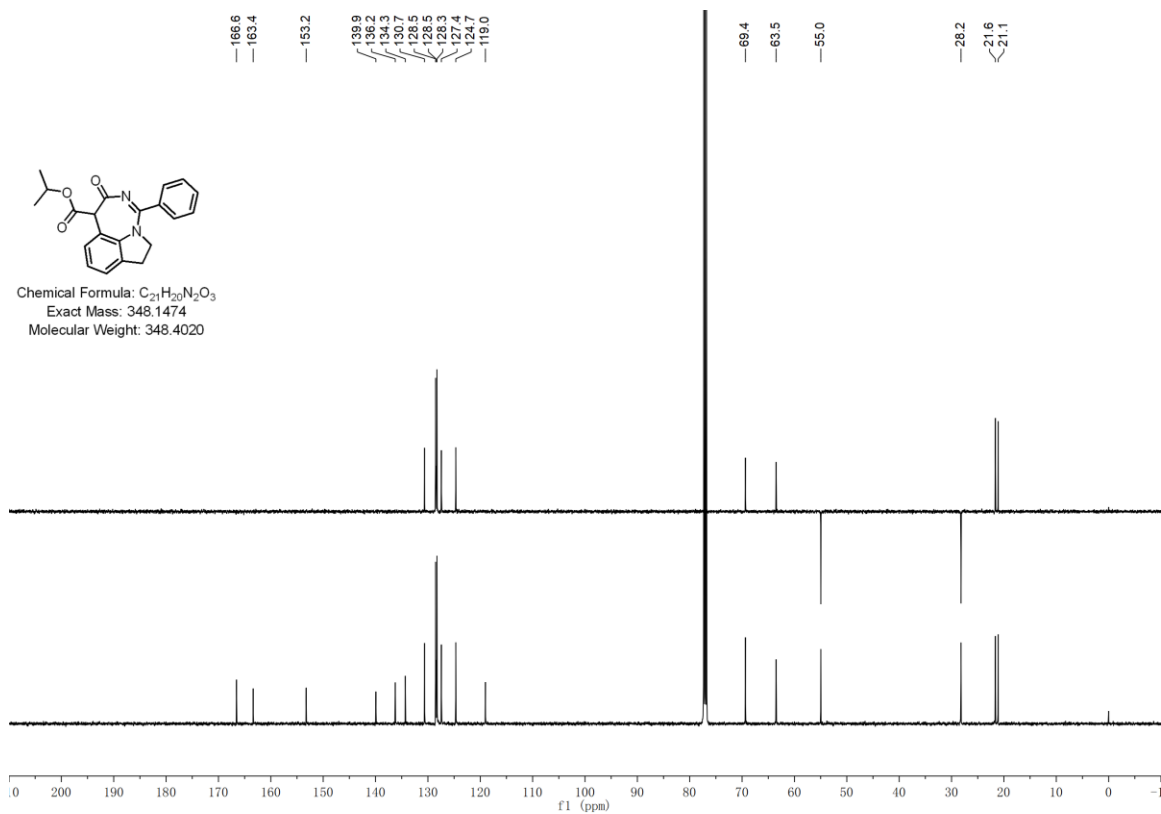

$^{13}C$  NMR spectrum of **3ac** (125 MHz, Chloroform-*d*)

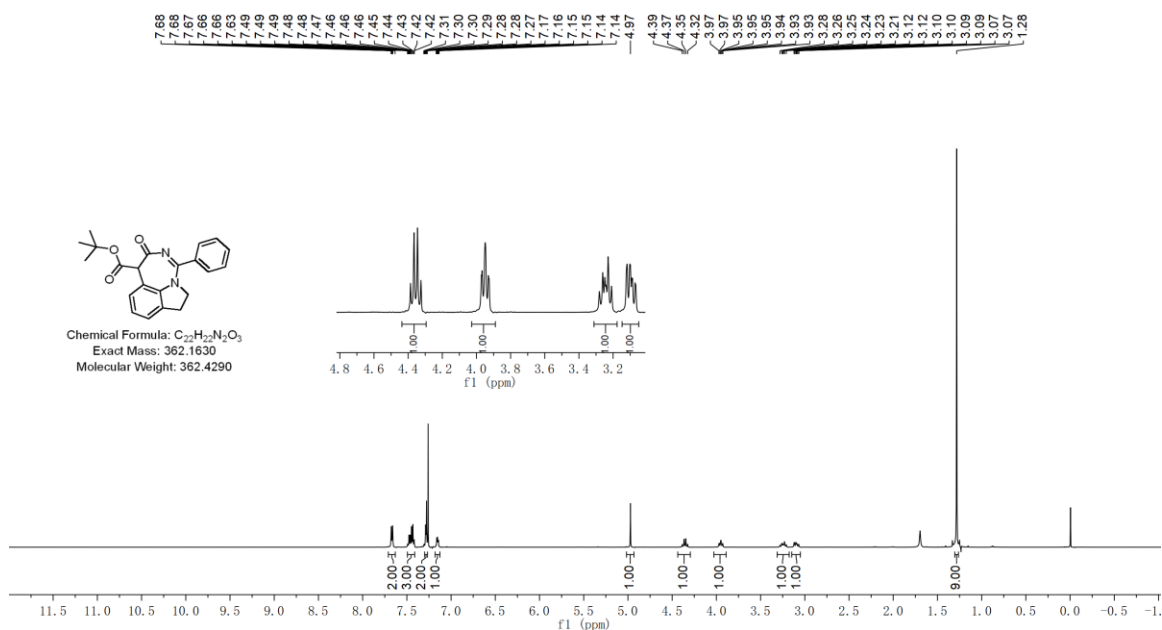

<sup>1</sup>H NMR spectrum of **3ad** (500 MHz, Chloroform-*d*)

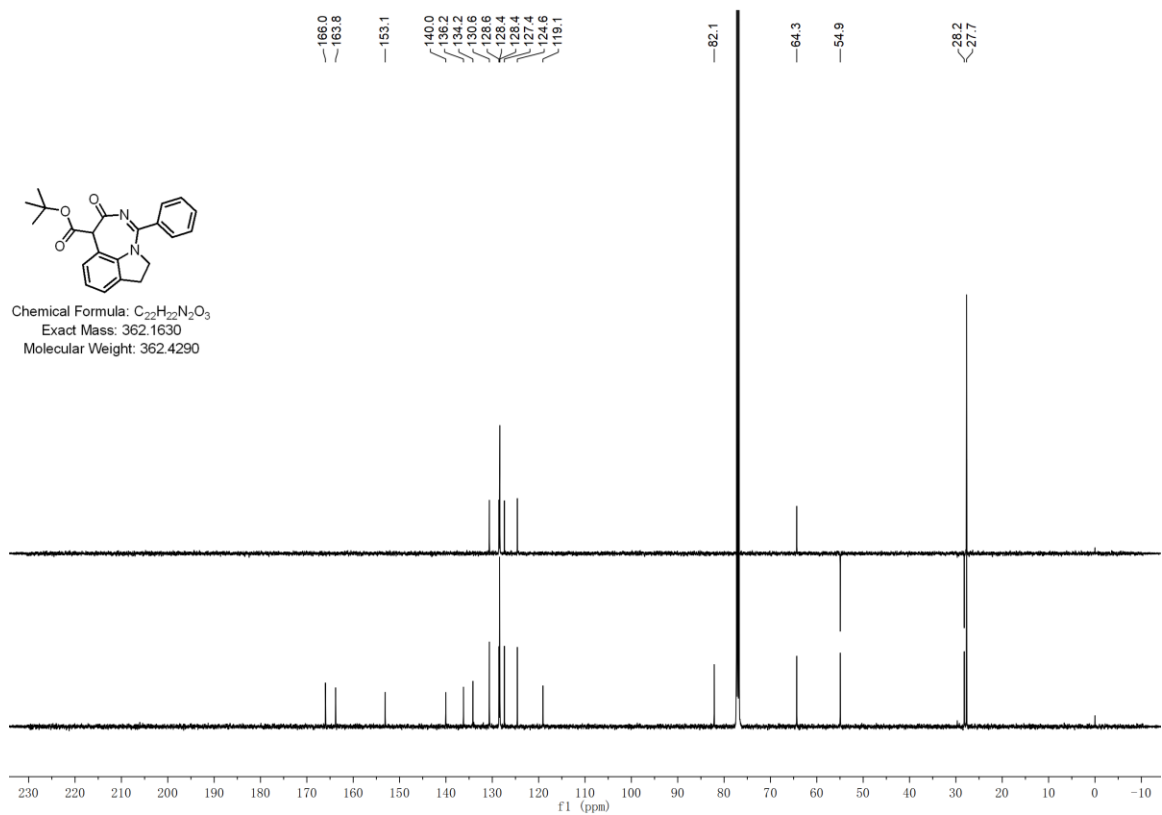

<sup>13</sup>C NMR spectrum of **3ad** (125 MHz, Chloroform-*d*)

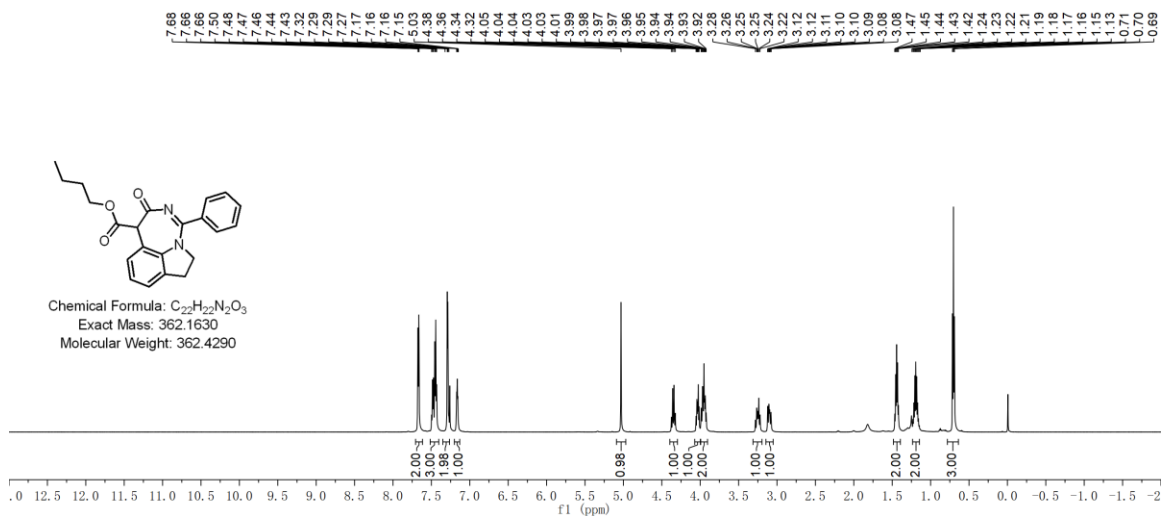

$^1\text{H}$  NMR spectrum of **3ae** (600 MHz, Chloroform-*d*)

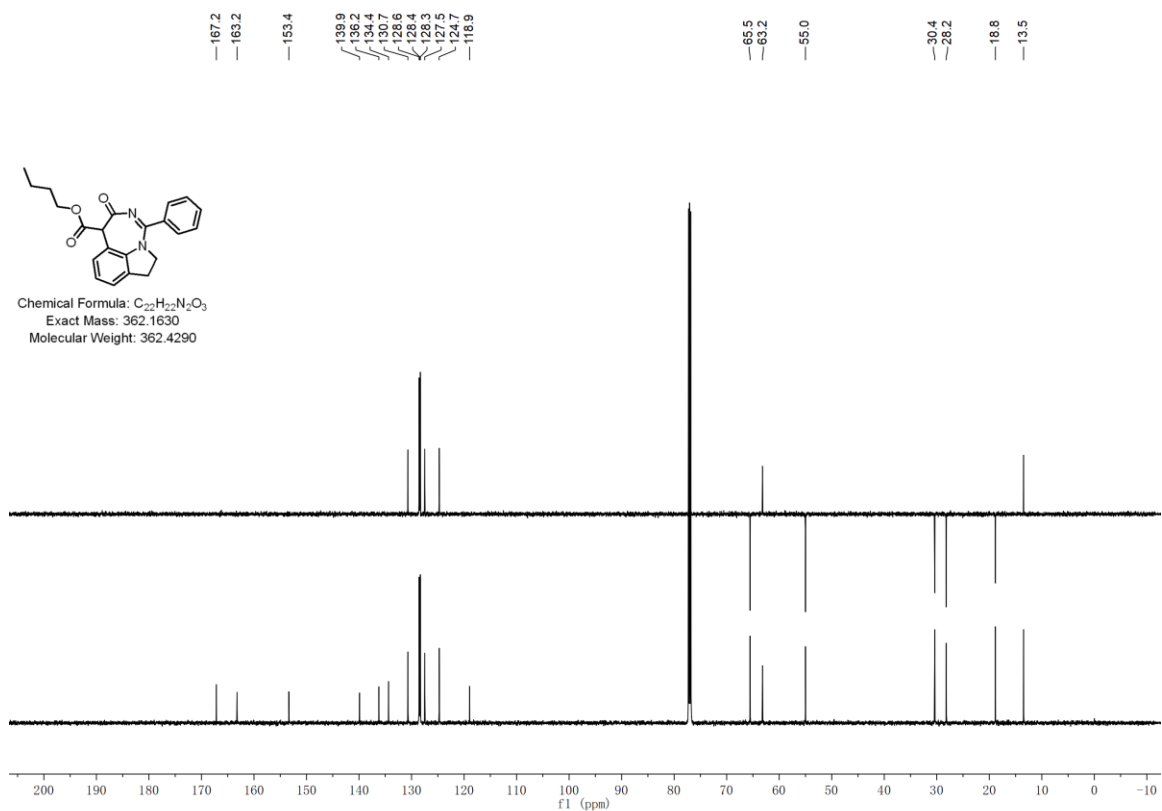

$^{13}\text{C}$  NMR spectrum of **3ae** (150 MHz, Chloroform-*d*)

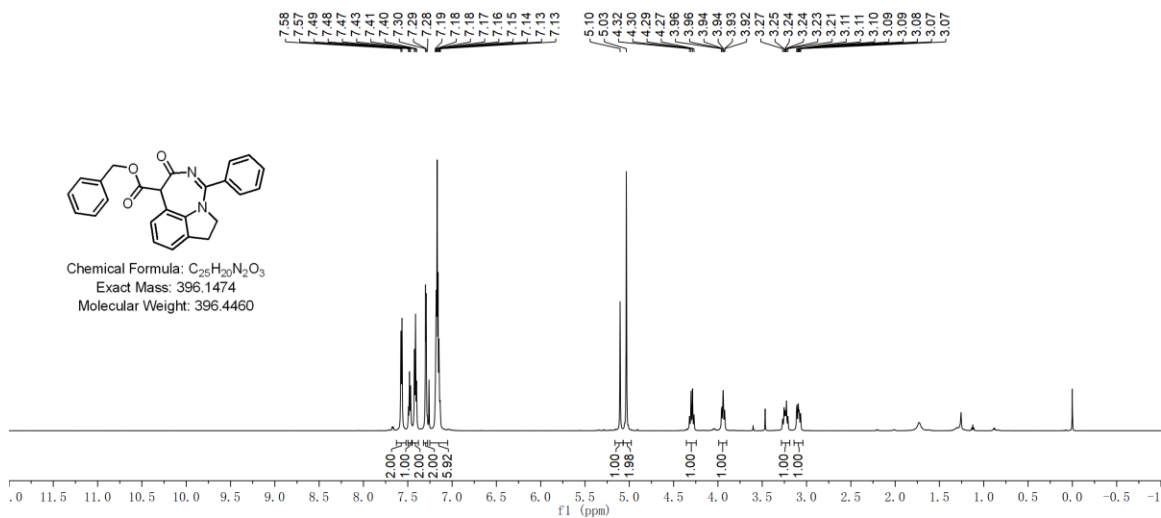

$^1\text{H}$  NMR spectrum of **3af** (600 MHz, Chloroform-*d*)

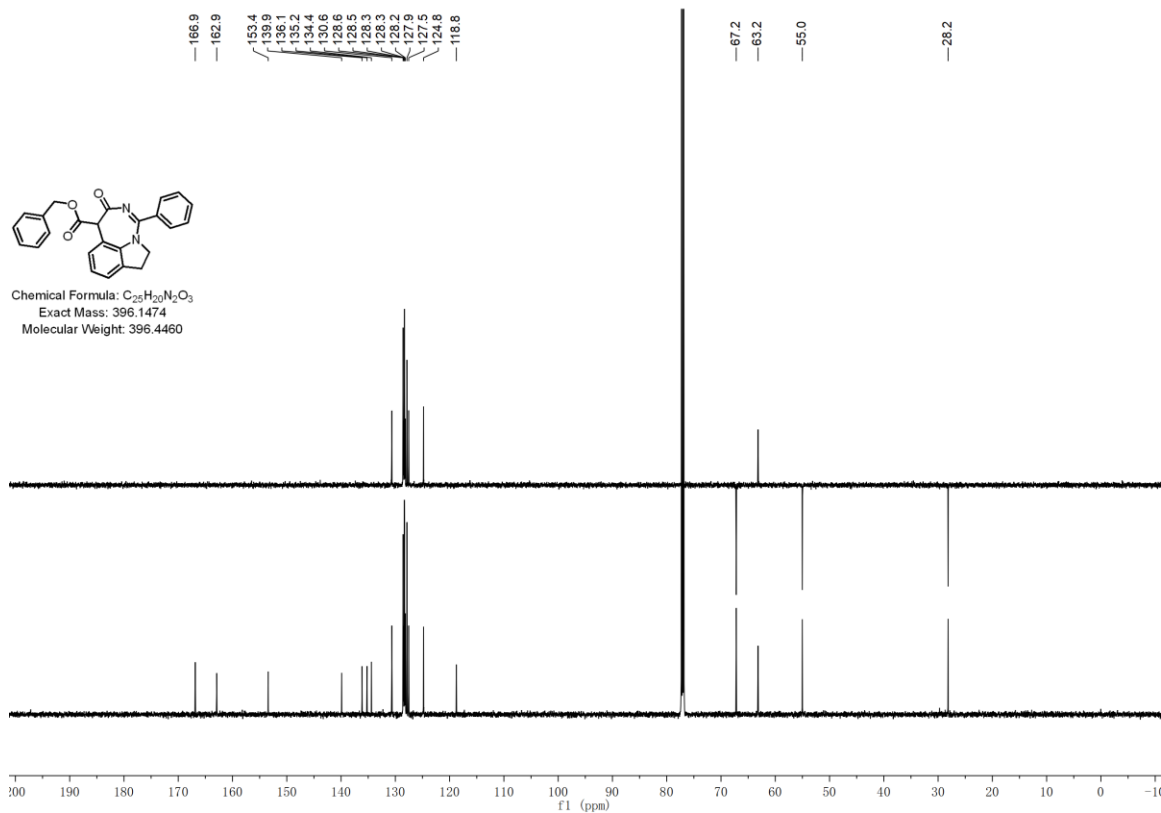

$^{13}\text{C}$  NMR spectrum of **3af** (150 MHz, Chloroform-*d*)

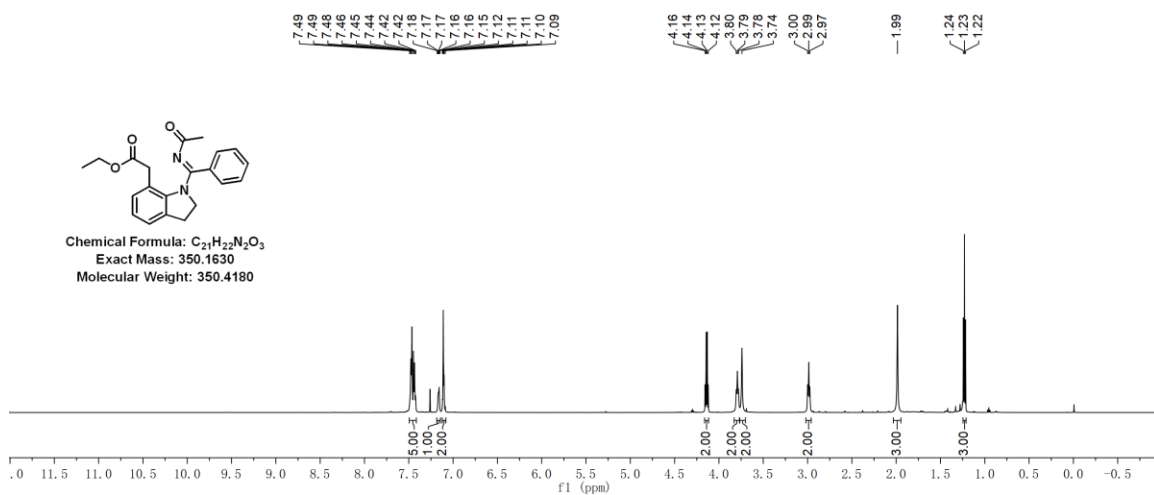

$^1\text{H}$  NMR spectrum of **5aa** (600 MHz, Chloroform-*d*)

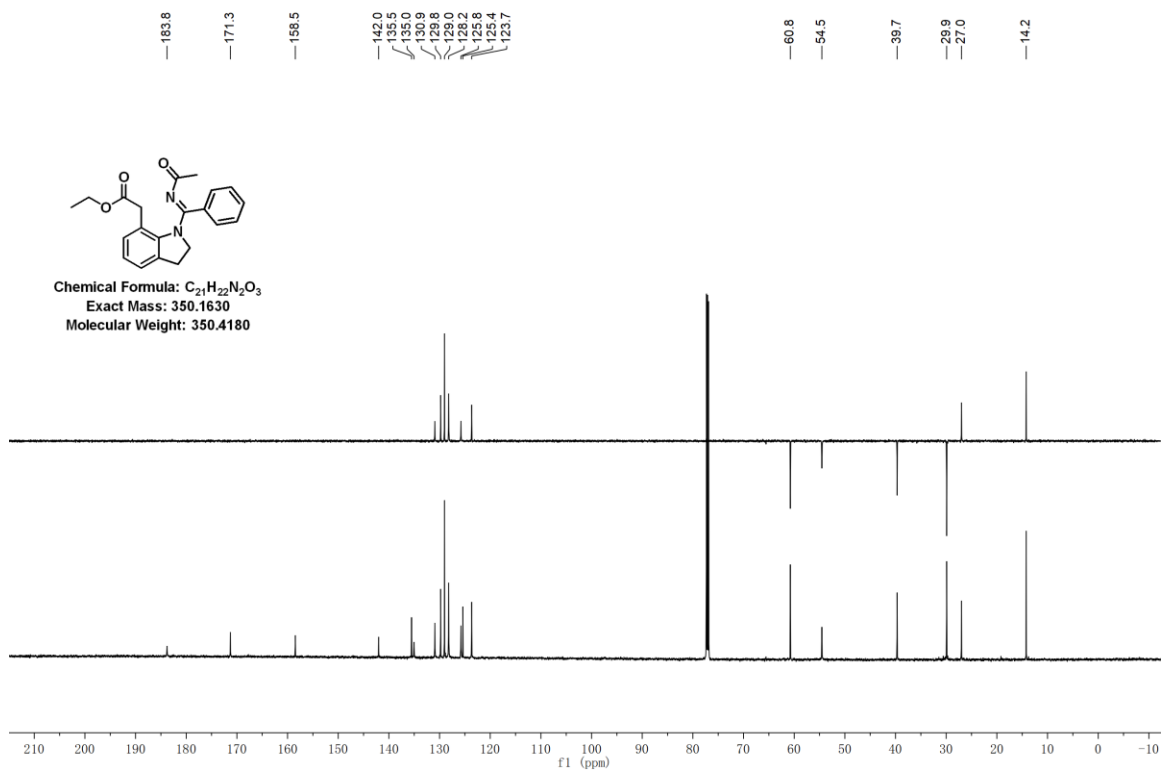

$^{13}\text{C}$  NMR spectrum of **5aa** (150 MHz, Chloroform-*d*)



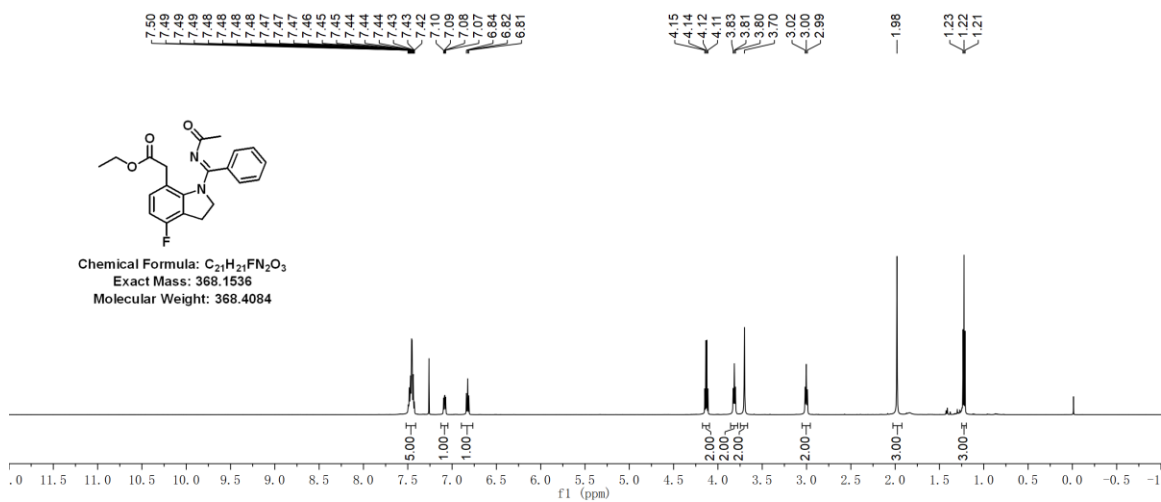

$^1\text{H}$  NMR spectrum of **5ba** (600 MHz, Chloroform-*d*)

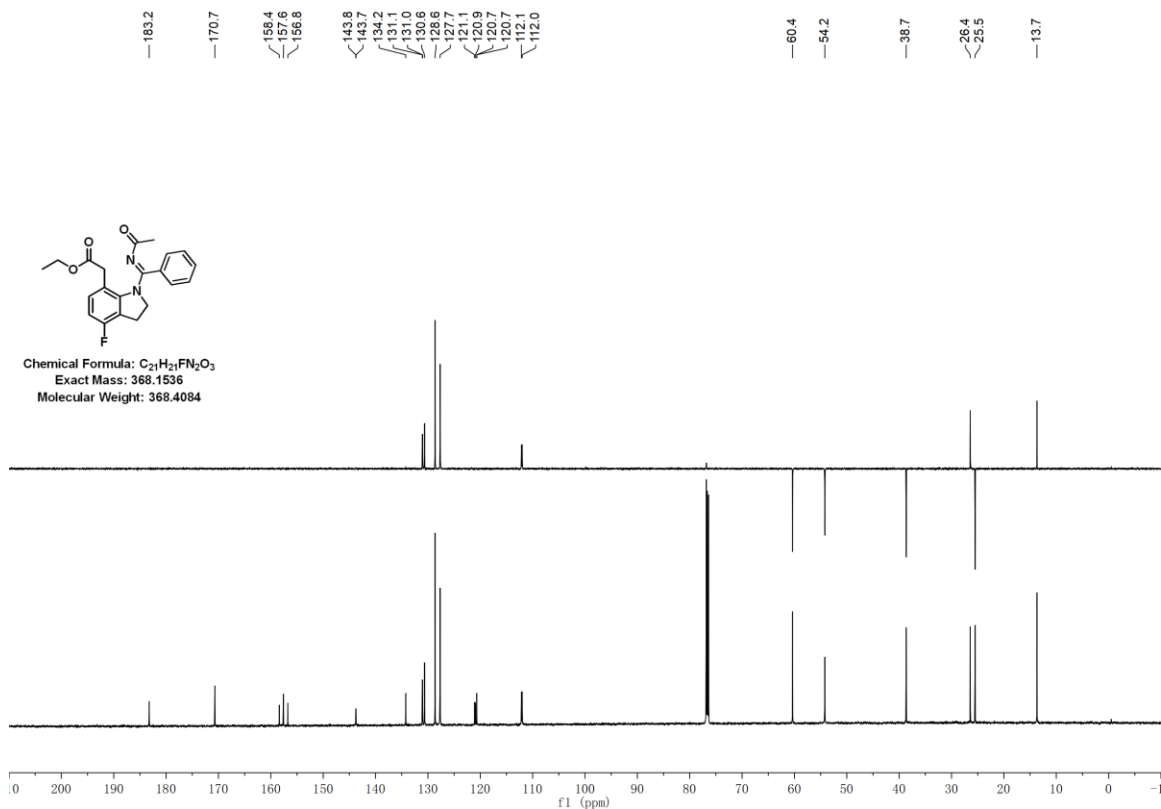

$^{13}\text{C}$  NMR spectrum of **5ba** (150 MHz, Chloroform-*d*)

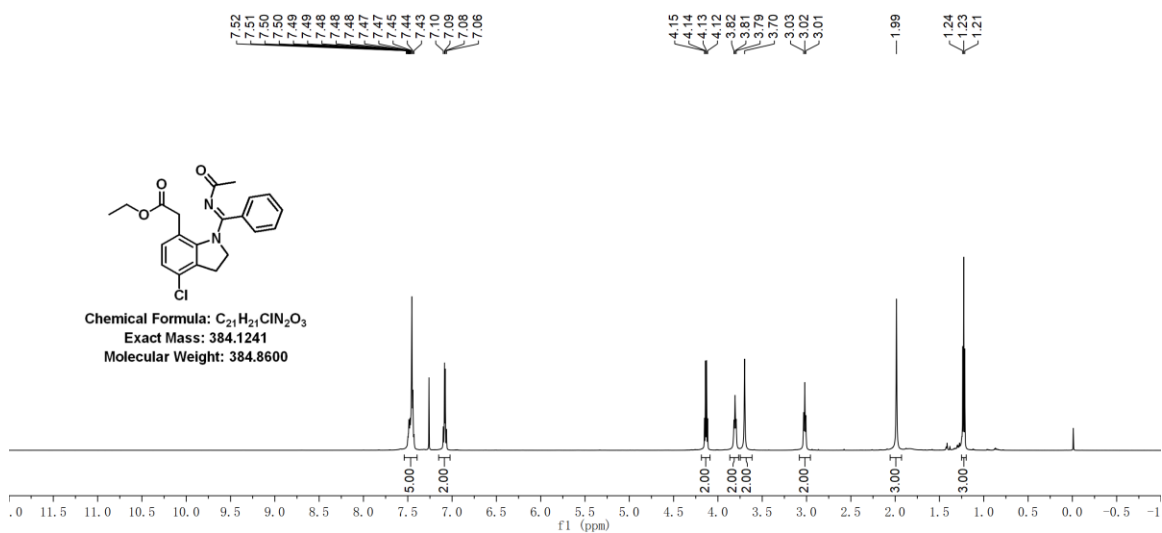

$^1H$  NMR spectrum of **5ca** (600 MHz, Chloroform-*d*)

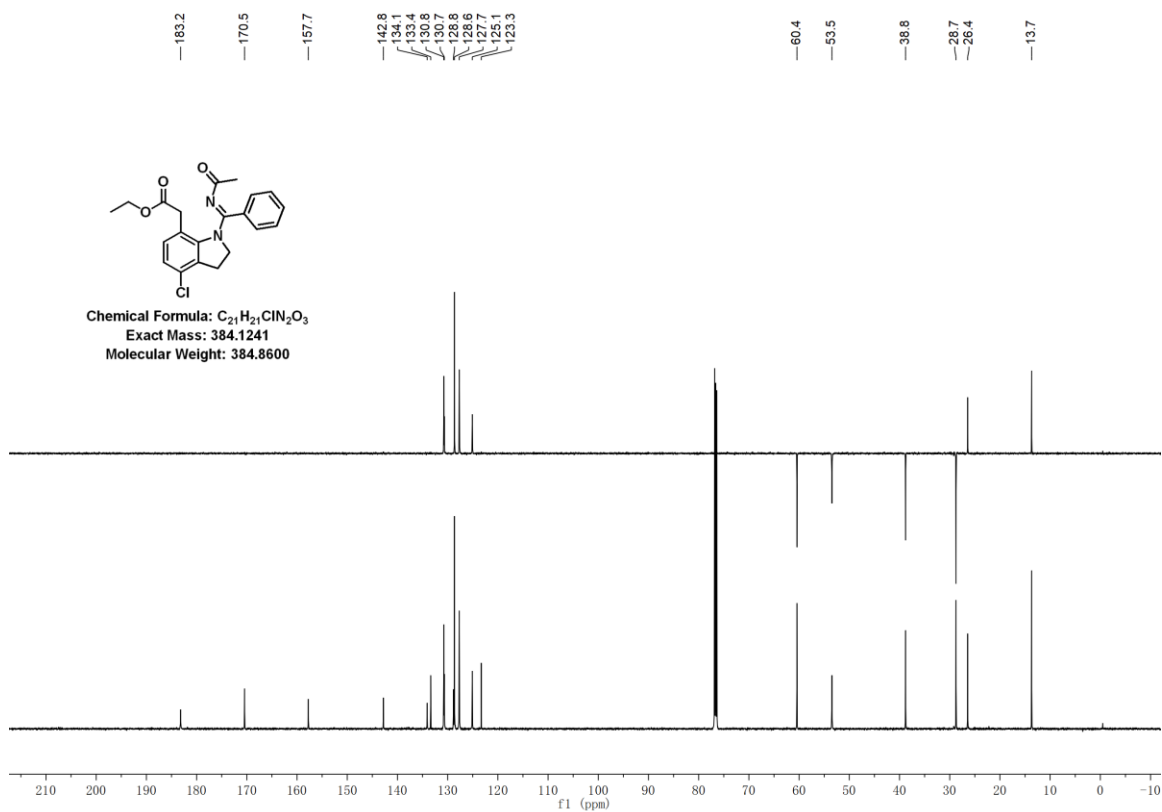

$^{13}C$  NMR spectrum of **5ca** (150 MHz, Chloroform-*d*)

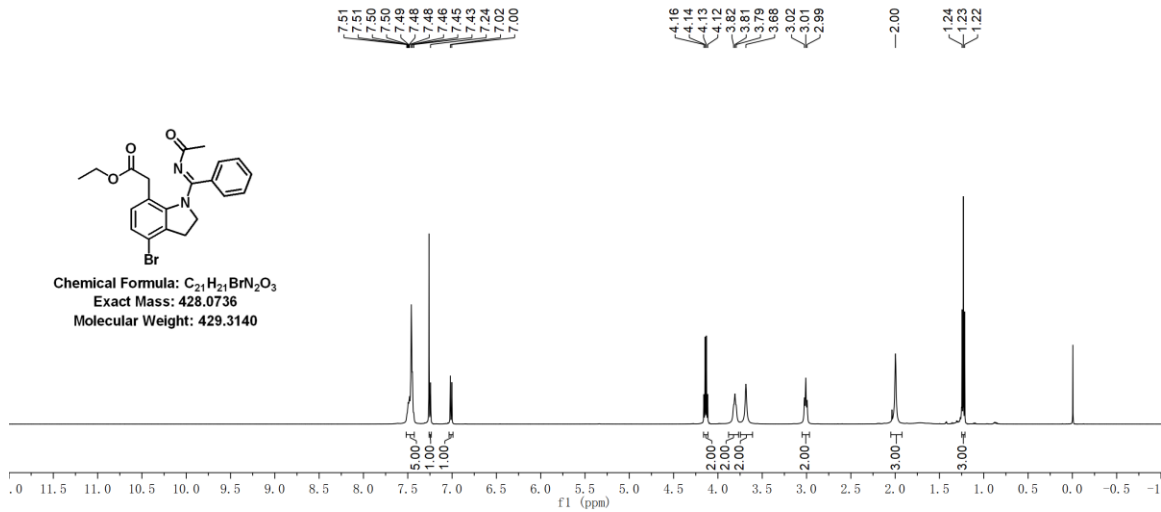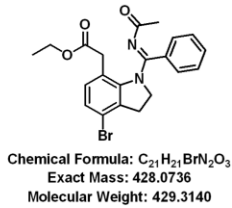

<sup>1</sup>H NMR spectrum of **5da** (500 MHz, Chloroform-*d*)

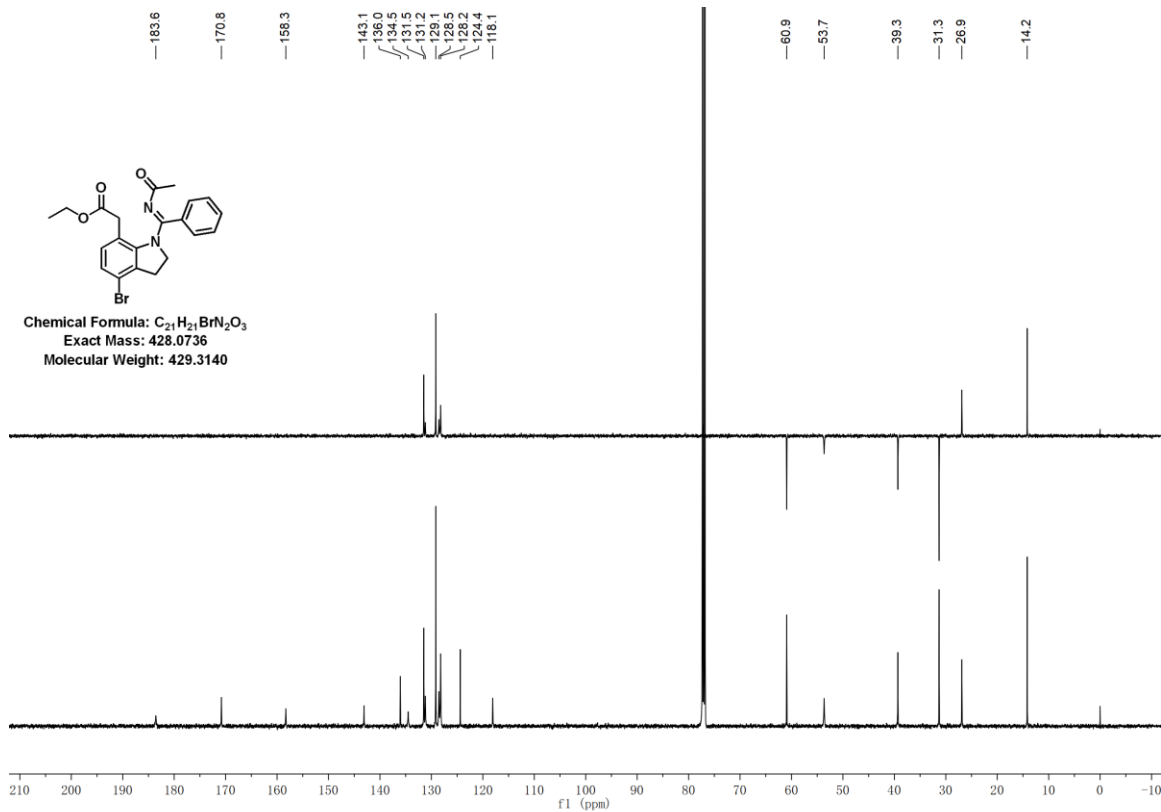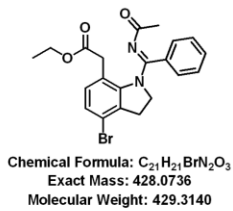

<sup>13</sup>C NMR spectrum of **5da** (125 MHz, Chloroform-*d*)

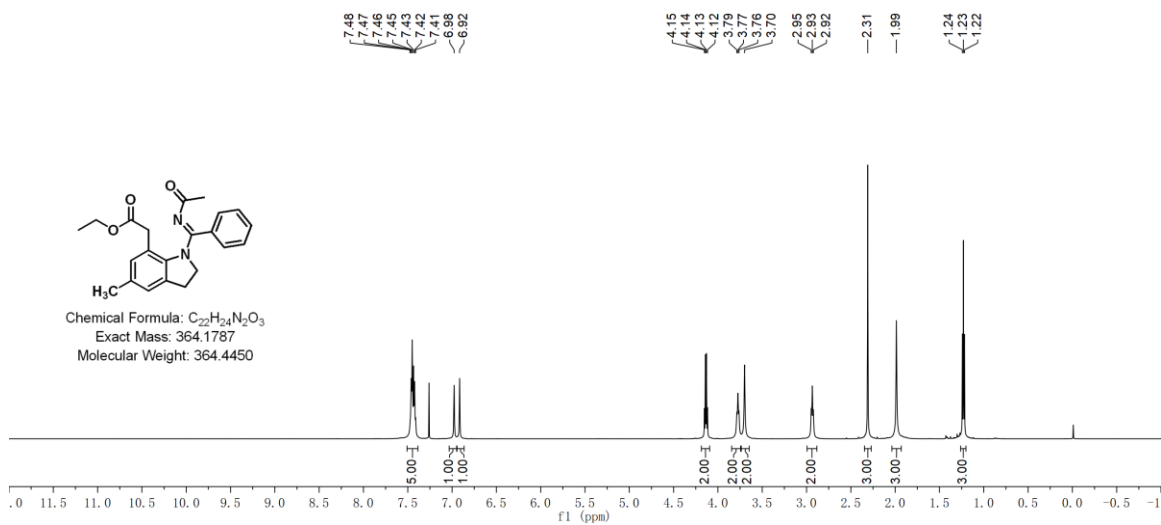

<sup>1</sup>H NMR spectrum of **5fa** (600 MHz, Chloroform-*d*)

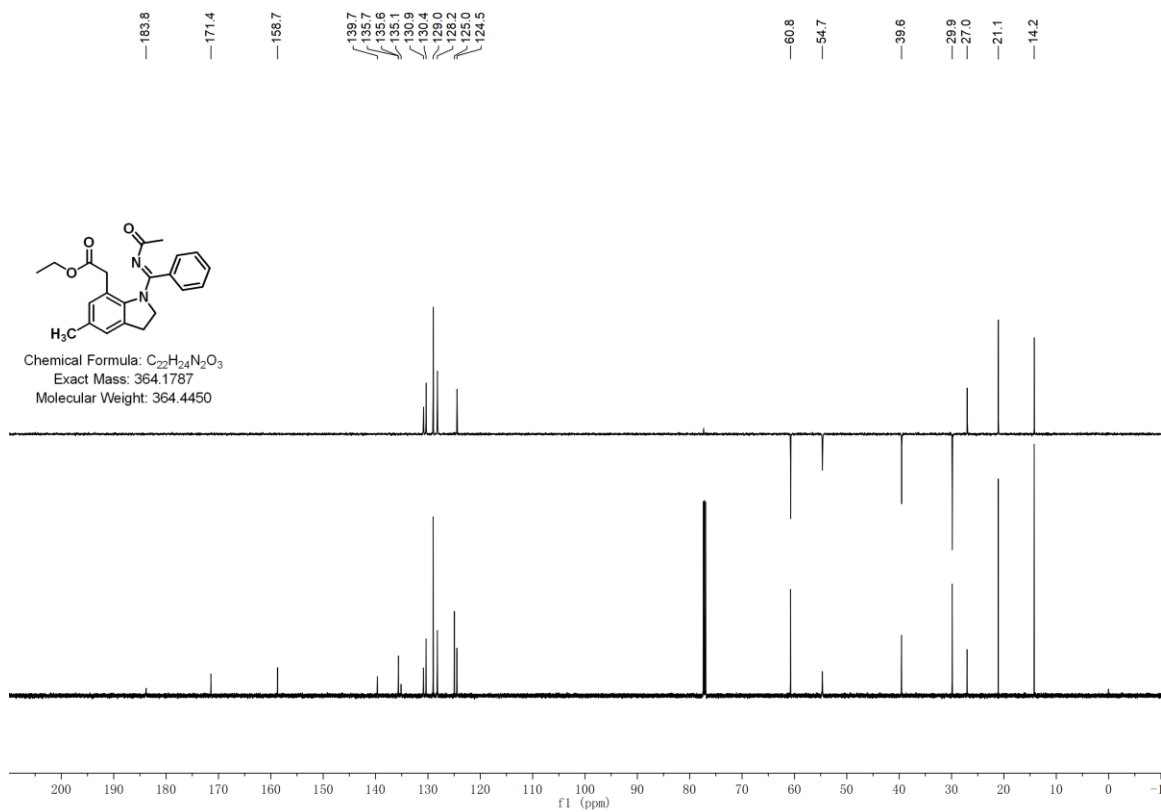

<sup>13</sup>C NMR spectrum of **5fa** (150 MHz, Chloroform-*d*)

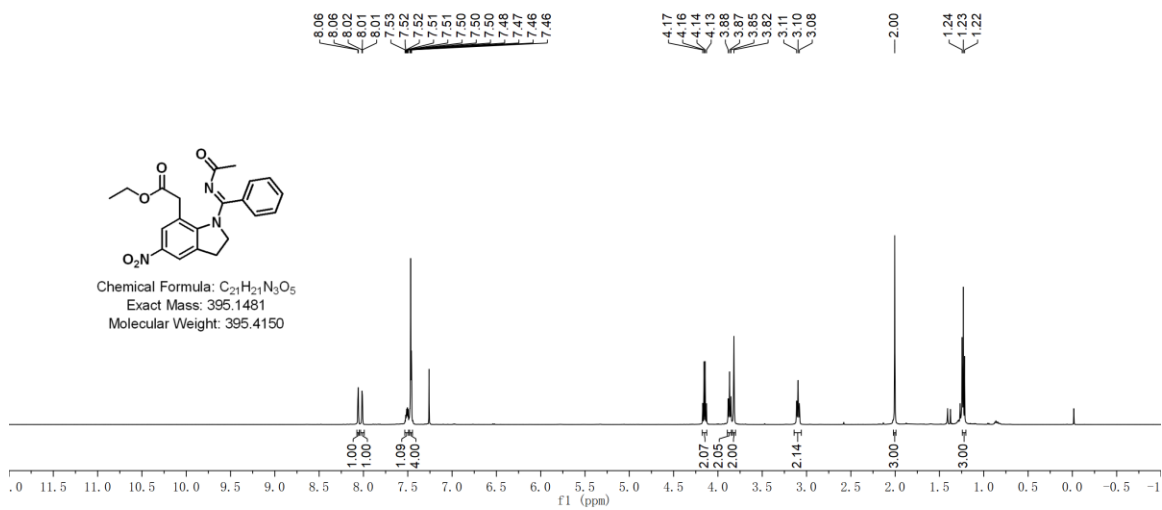

<sup>1</sup>H NMR spectrum of **5ga** (500 MHz, Chloroform-*d*)

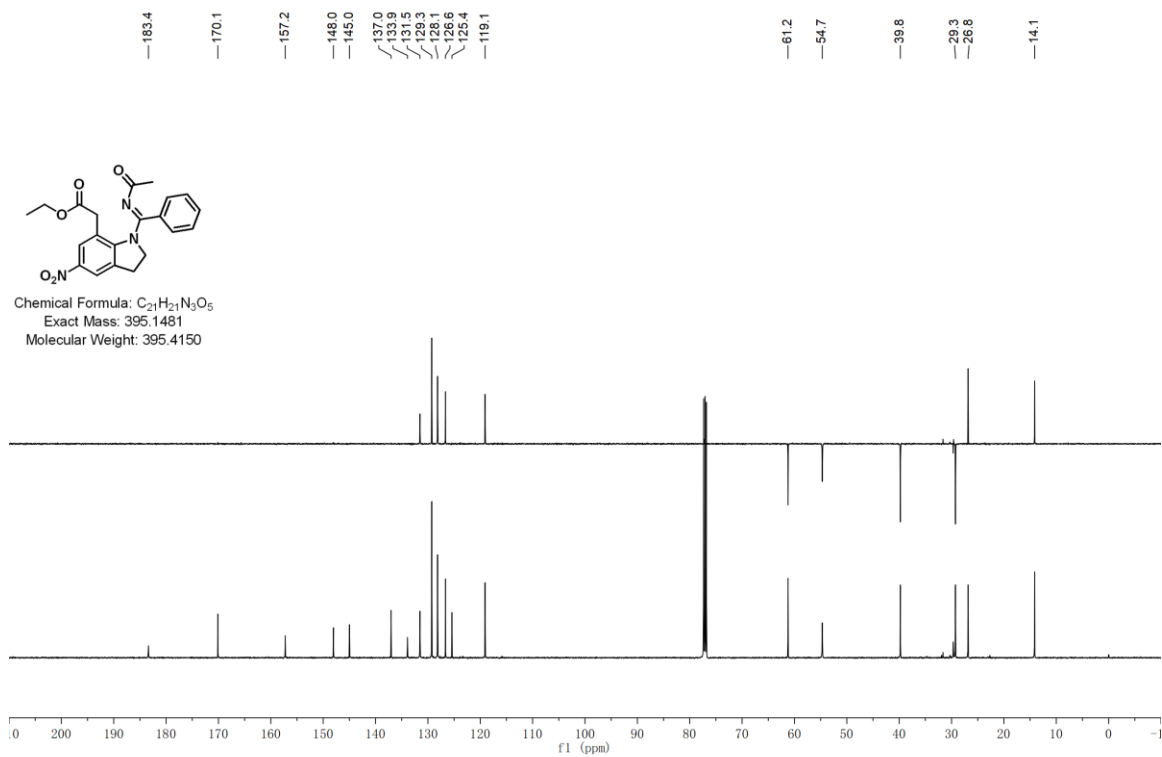

<sup>13</sup>C NMR spectrum of **5ga** (125 MHz, Chloroform-*d*)

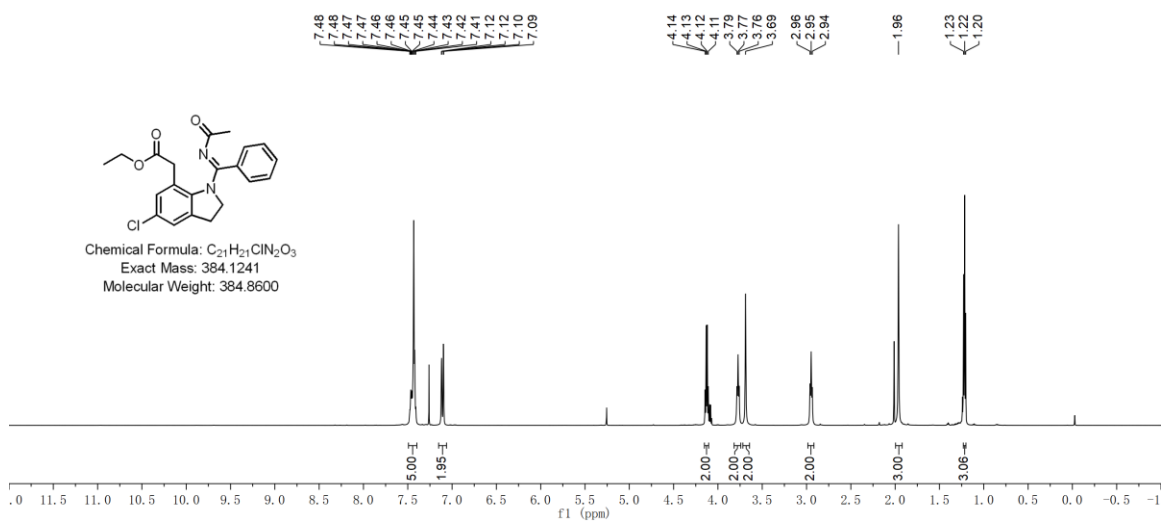

<sup>1</sup>H NMR spectrum of **5ia** (600 MHz, Chloroform-*d*)

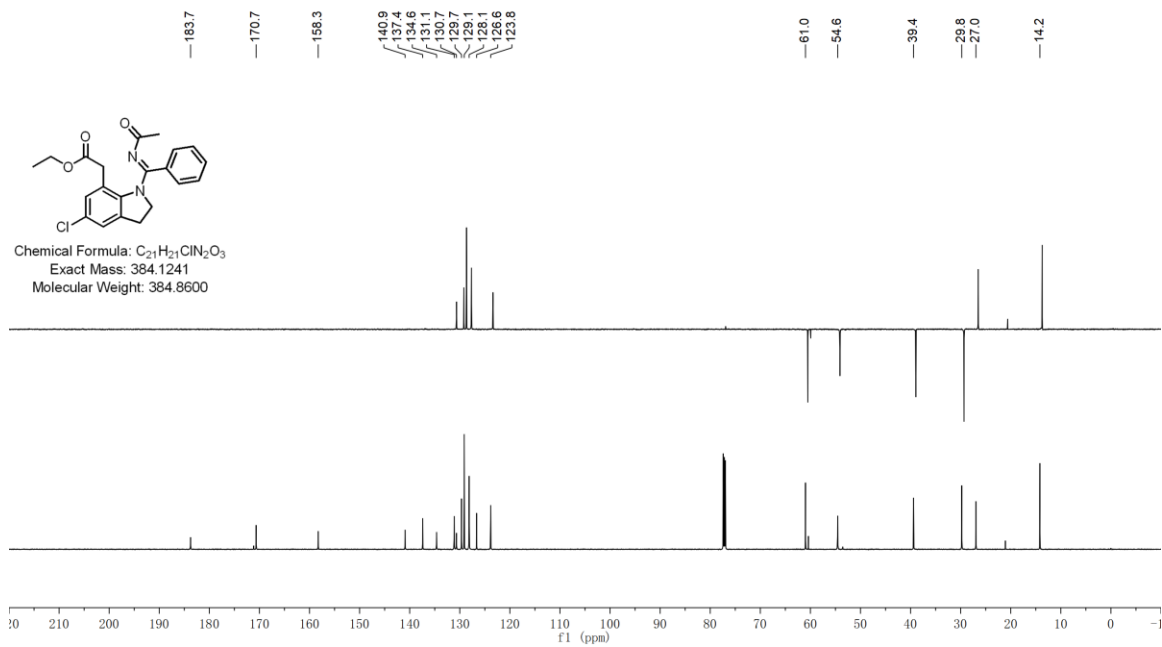

<sup>13</sup>C NMR spectrum of **5ia** (150 MHz, Chloroform-*d*)

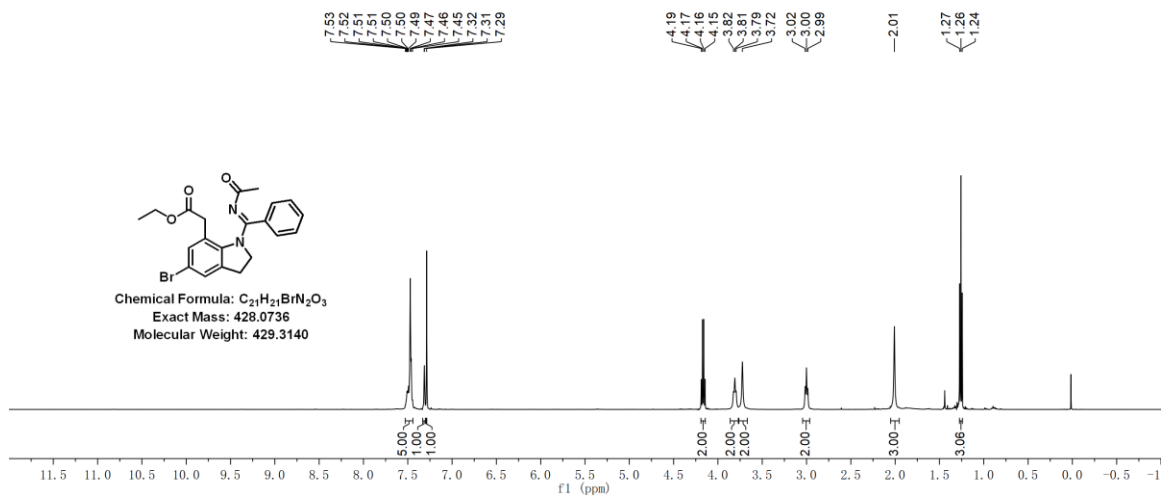

$^1\text{H}$  NMR spectrum of **5ja** (500 MHz, Chloroform-*d*)

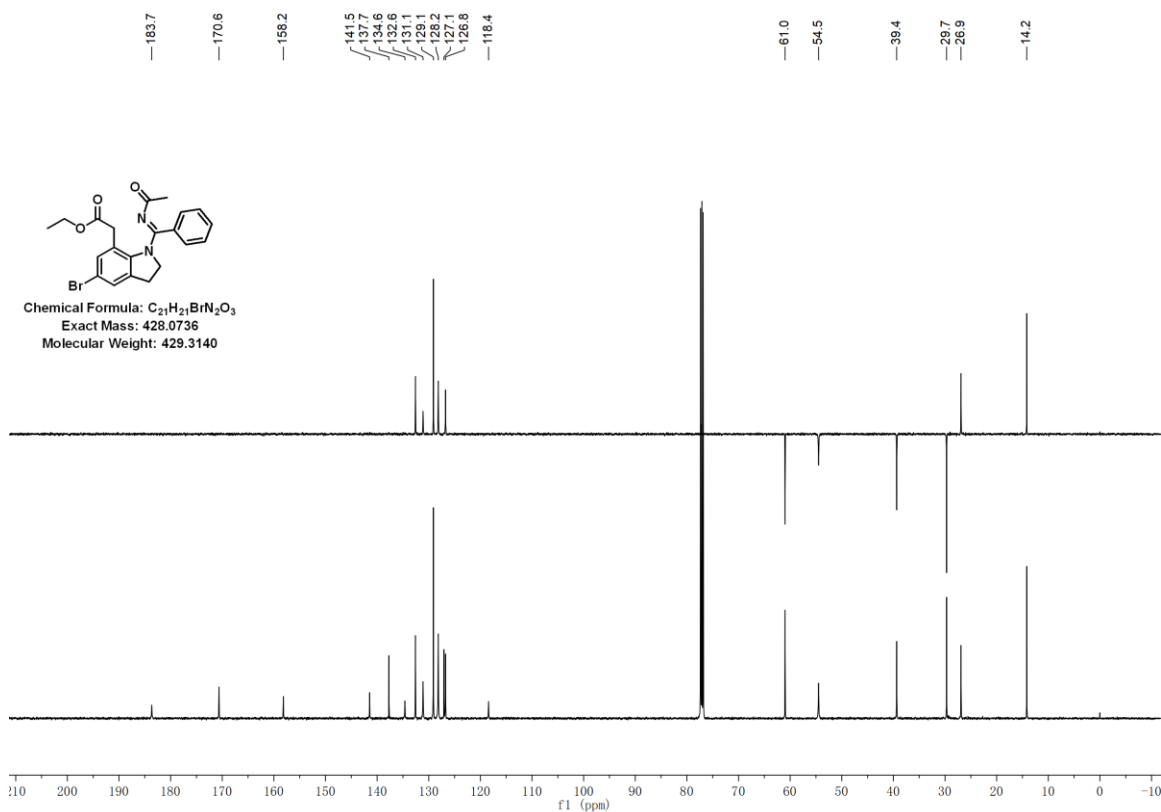

$^{13}\text{C}$  NMR spectrum of **5ja** (125 MHz, Chloroform-*d*)

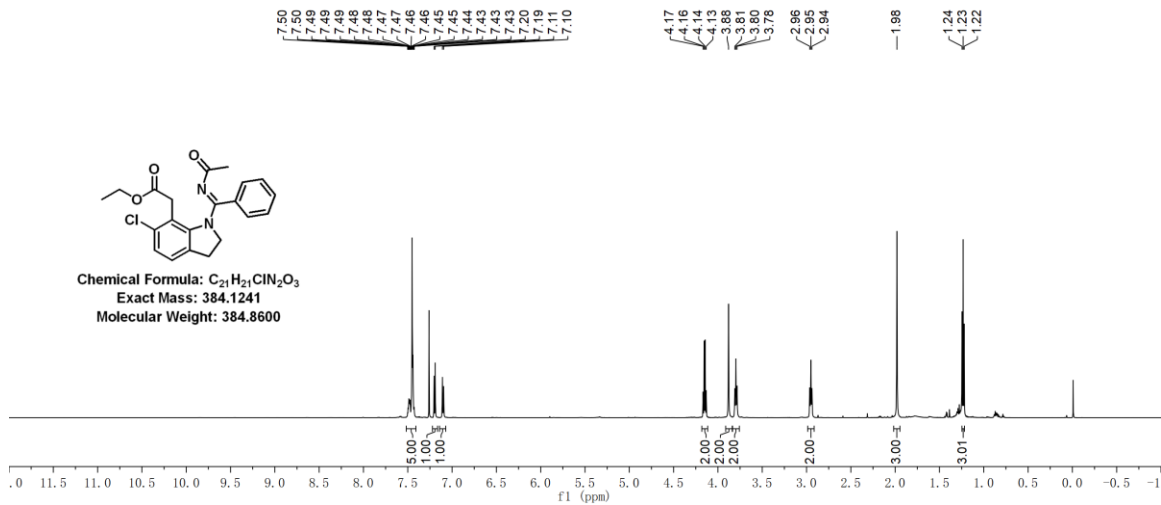

$^1H$  NMR spectrum of **5ka** (500 MHz, Chloroform-*d*)

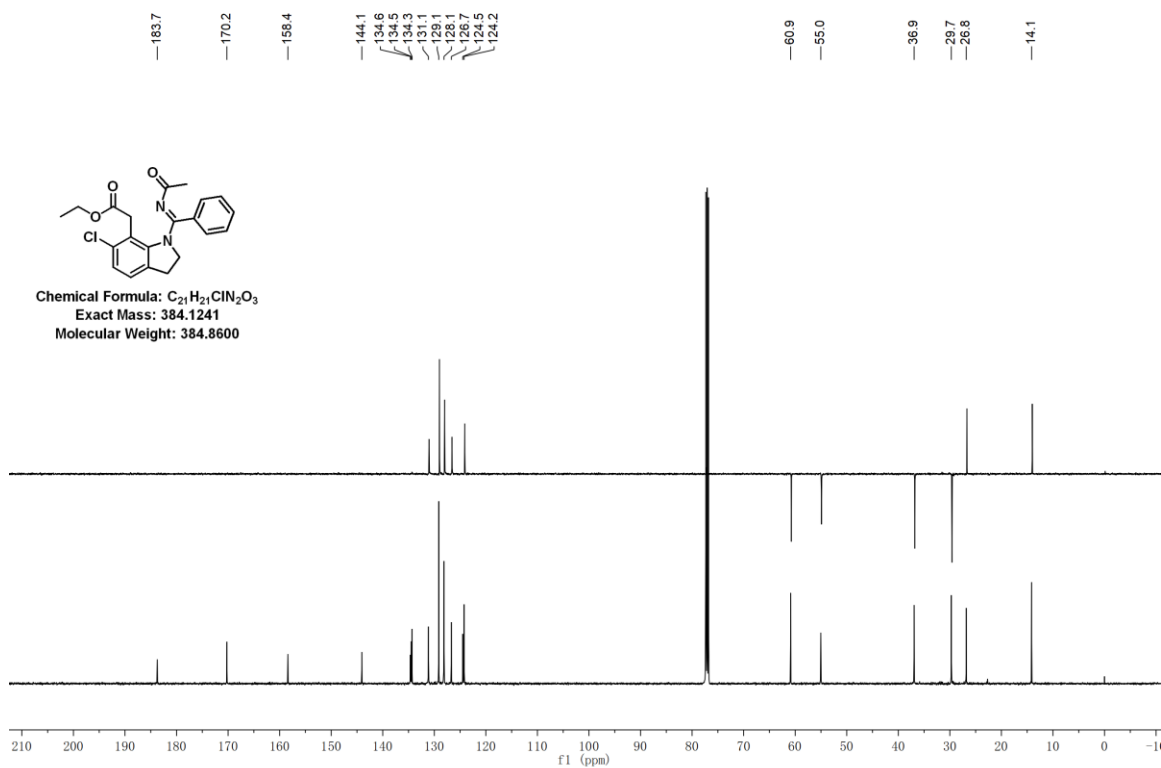

$^{13}C$  NMR spectrum of **5ka** (125 MHz, Chloroform-*d*)



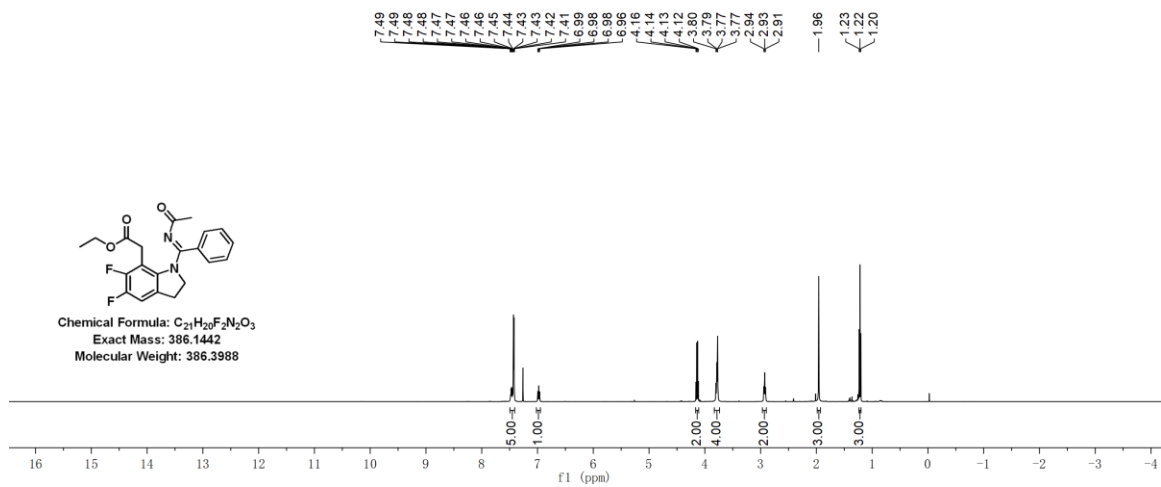

<sup>1</sup>H NMR spectrum of **5na** (500 MHz, Chloroform-*d*)

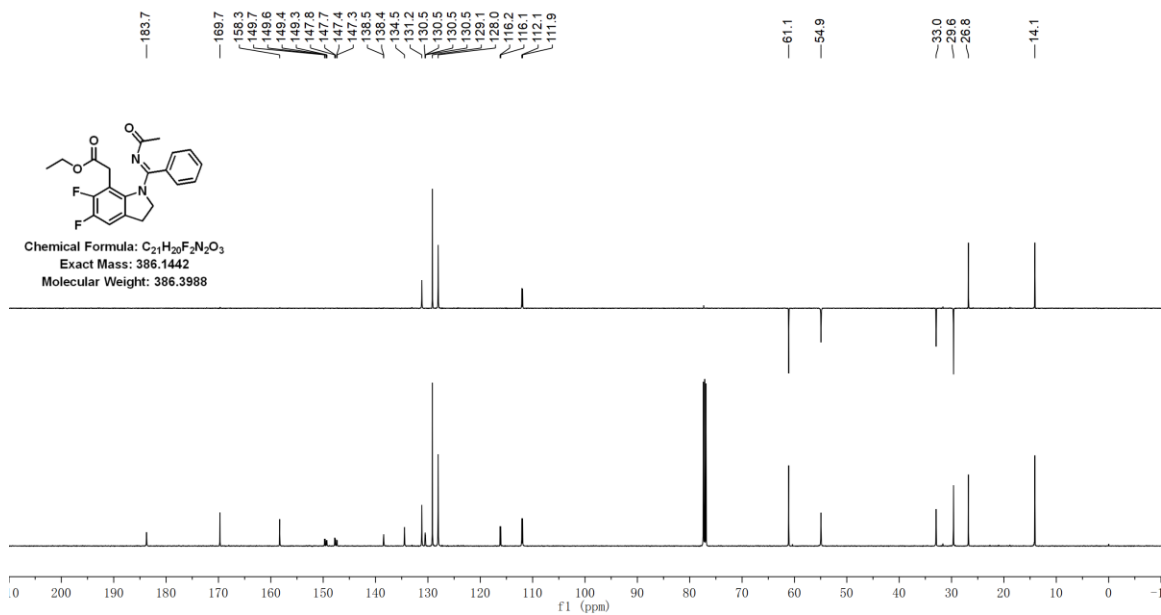

<sup>13</sup>C NMR spectrum of **5na** (125 MHz, Chloroform-*d*)

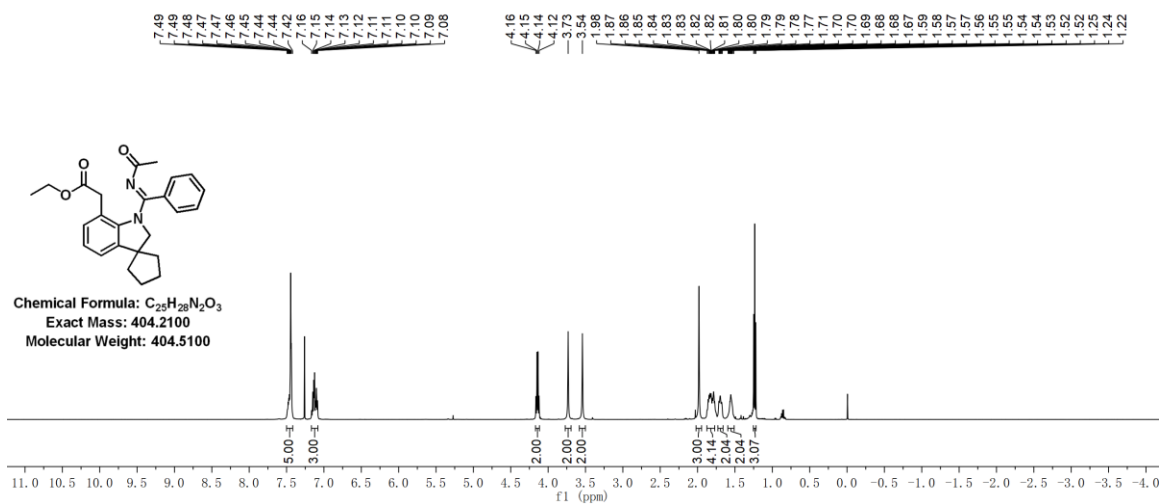

$^1\text{H}$  NMR spectrum of **5pa** (500 MHz, Chloroform-*d*)

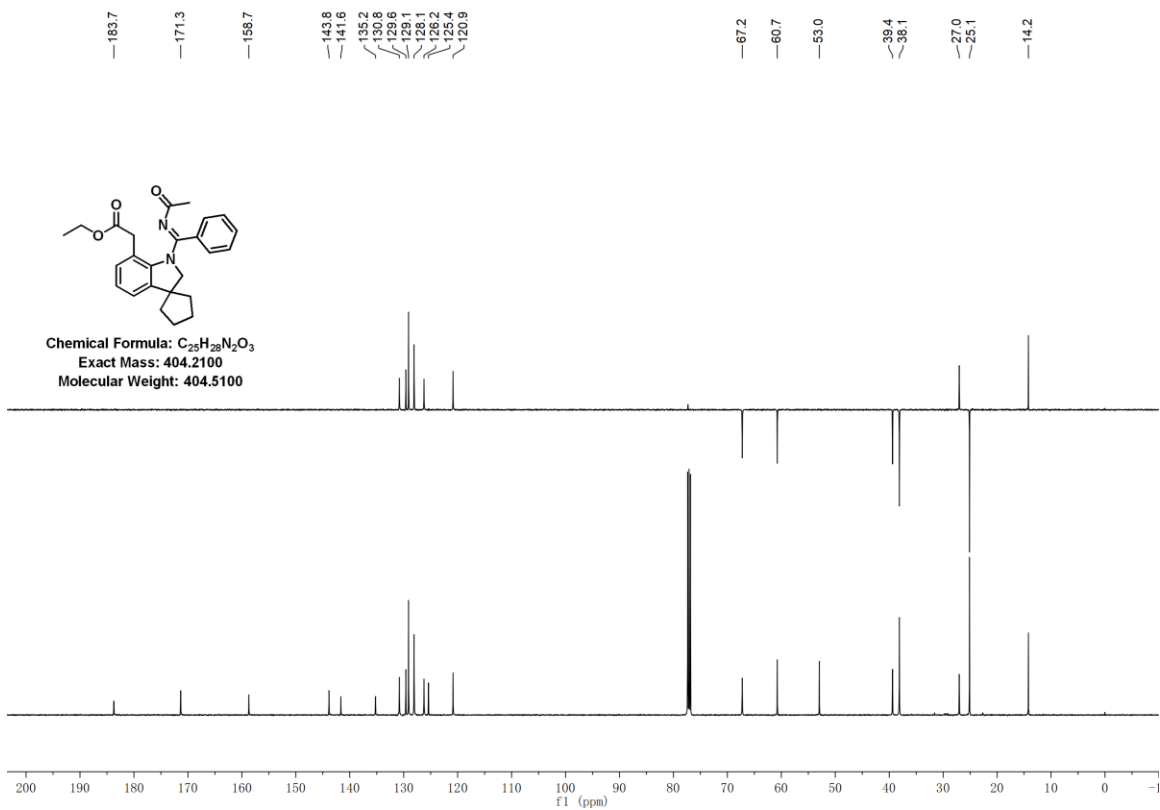

$^{13}\text{C}$  NMR spectrum of **5pa** (125 MHz, Chloroform-*d*)

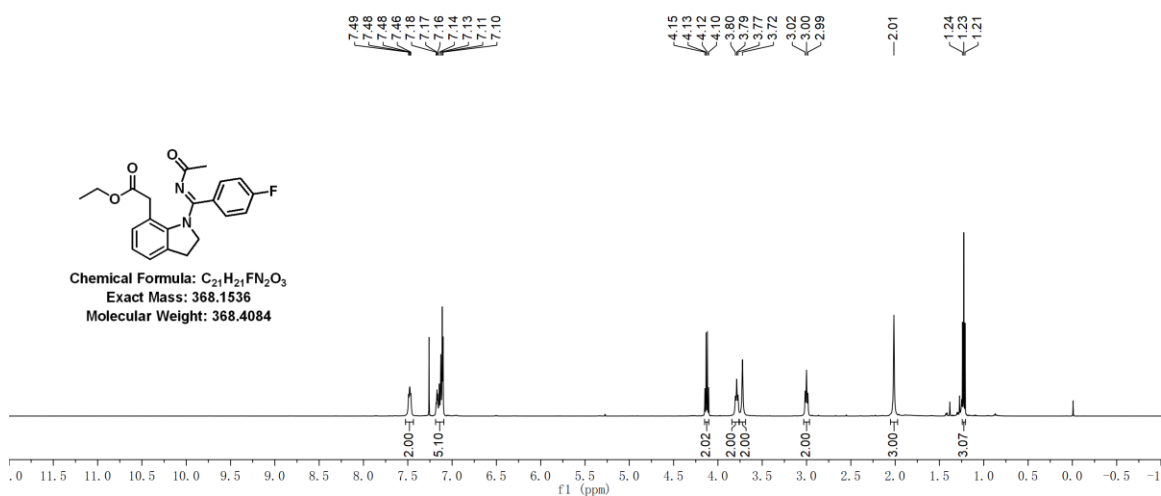

$^1\text{H}$  NMR spectrum of **5ra** (500 MHz, Chloroform-*d*)

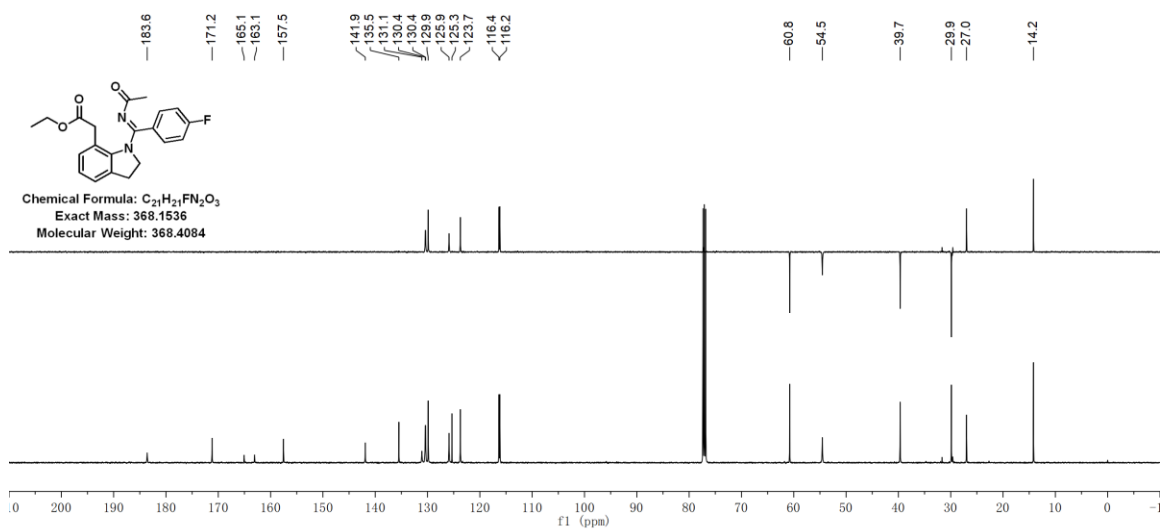

$^{13}\text{C}$  NMR spectrum of **5ra** (125 MHz, Chloroform-*d*)

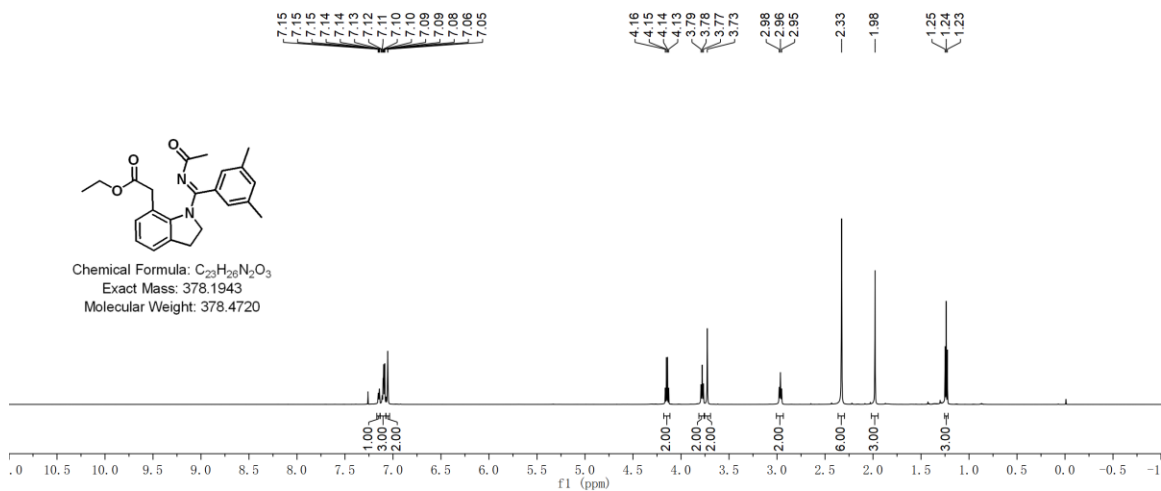

<sup>1</sup>H NMR spectrum of **5sa** (600 MHz, Chloroform-*d*)

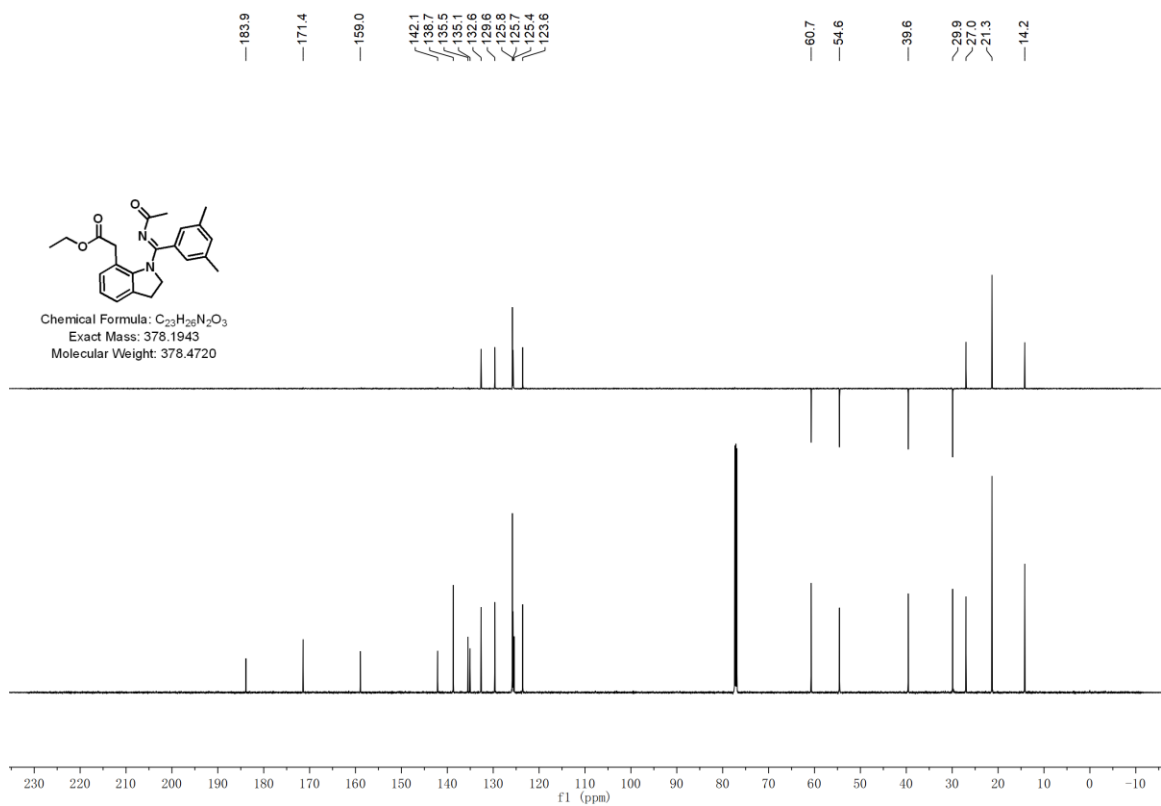

<sup>13</sup>C NMR spectrum of **5sa** (150 MHz, Chloroform-*d*)



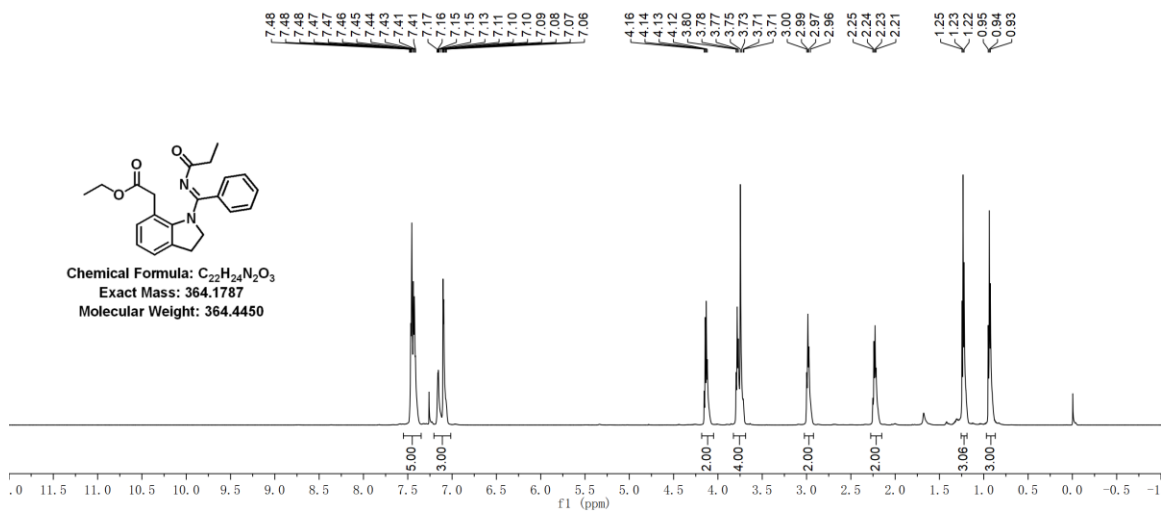

$^1\text{H}$  NMR spectrum of **5ab** (600 MHz, Chloroform-*d*)

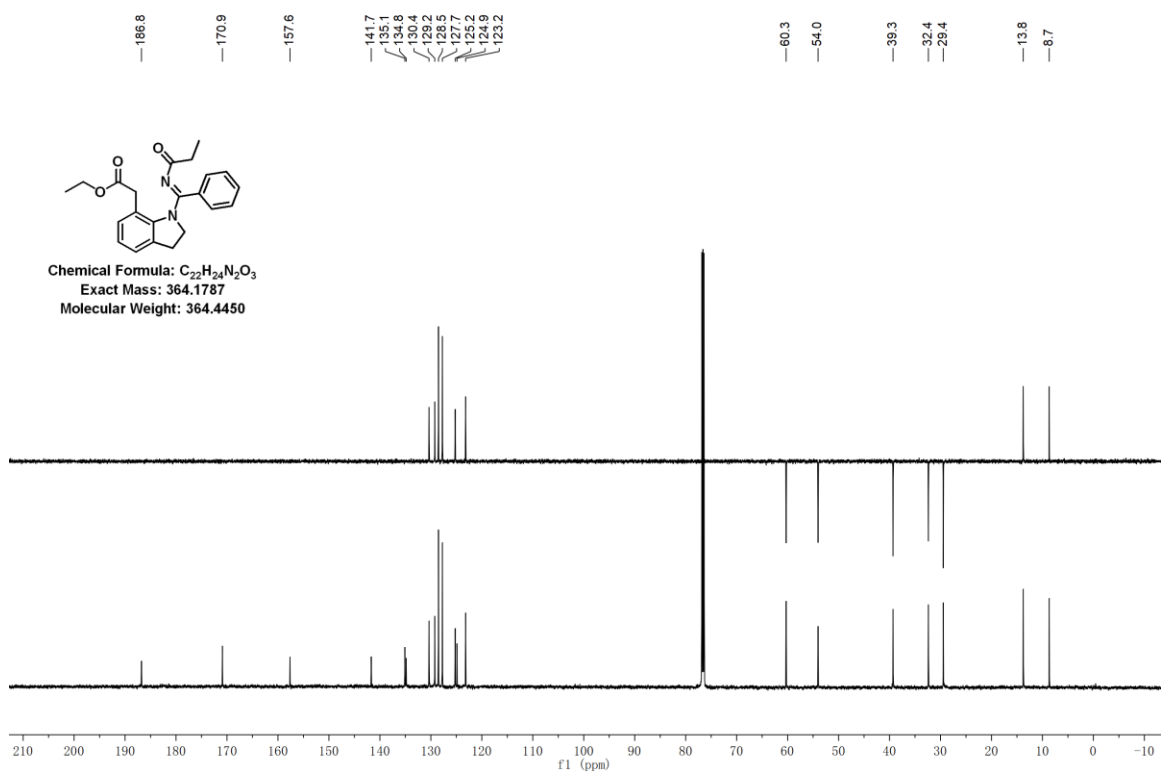

$^{13}\text{C}$  NMR spectrum of **5ab** (150 MHz, Chloroform-*d*)

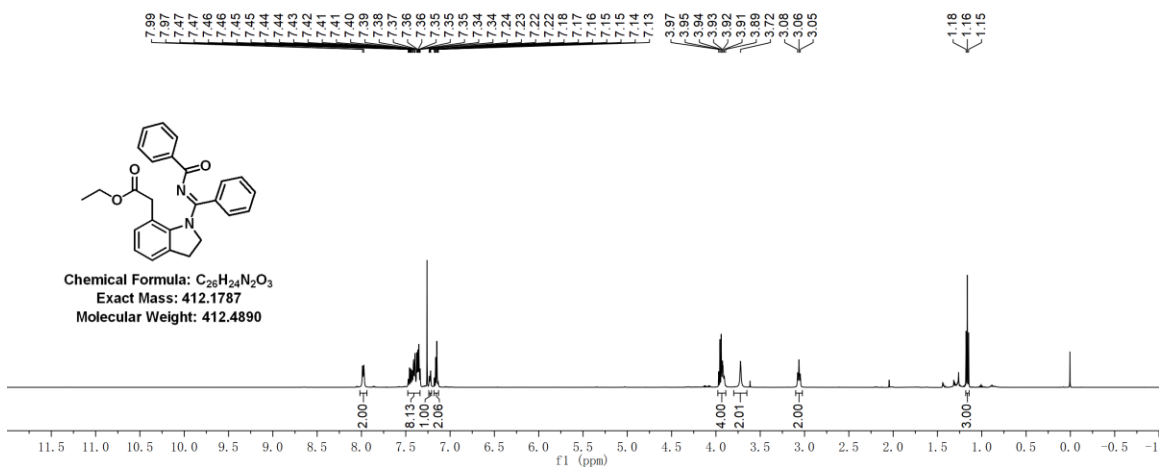

$^1H$  NMR spectrum of **5ac** (500 MHz, Chloroform-*d*)

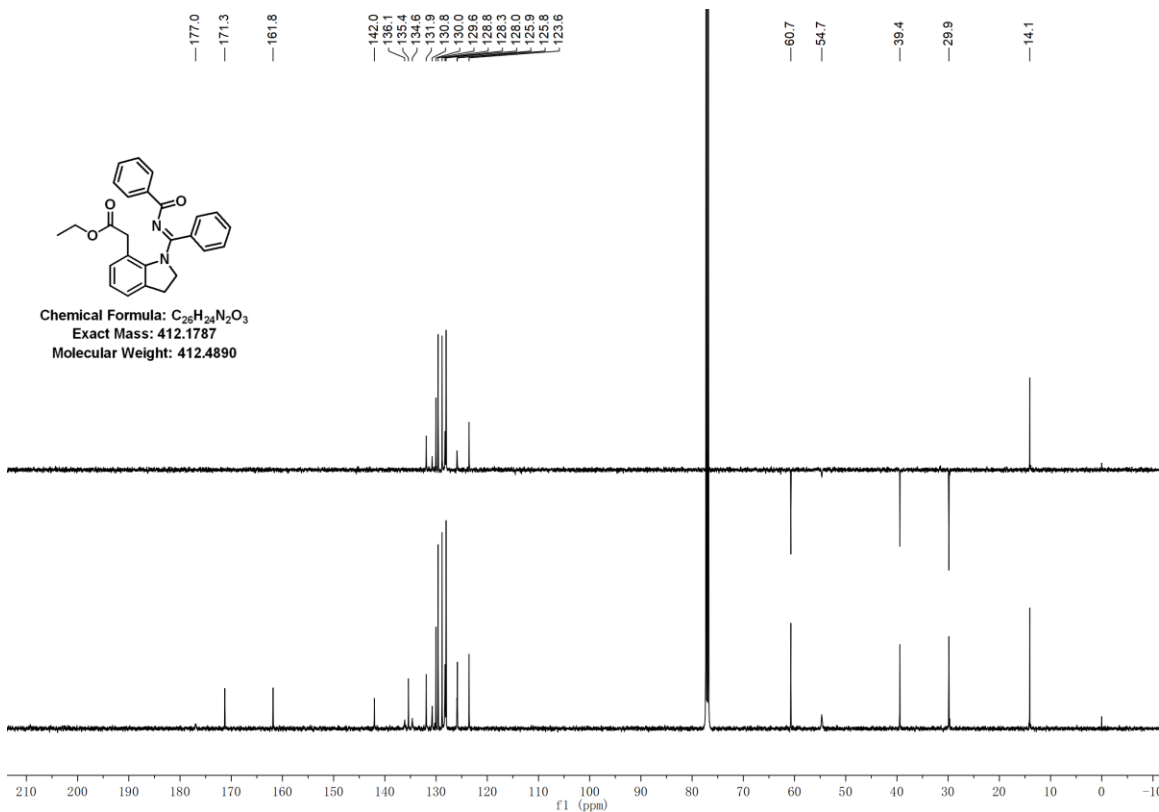

$^{13}C$  NMR spectrum of **5ac** (125 MHz, Chloroform-*d*)

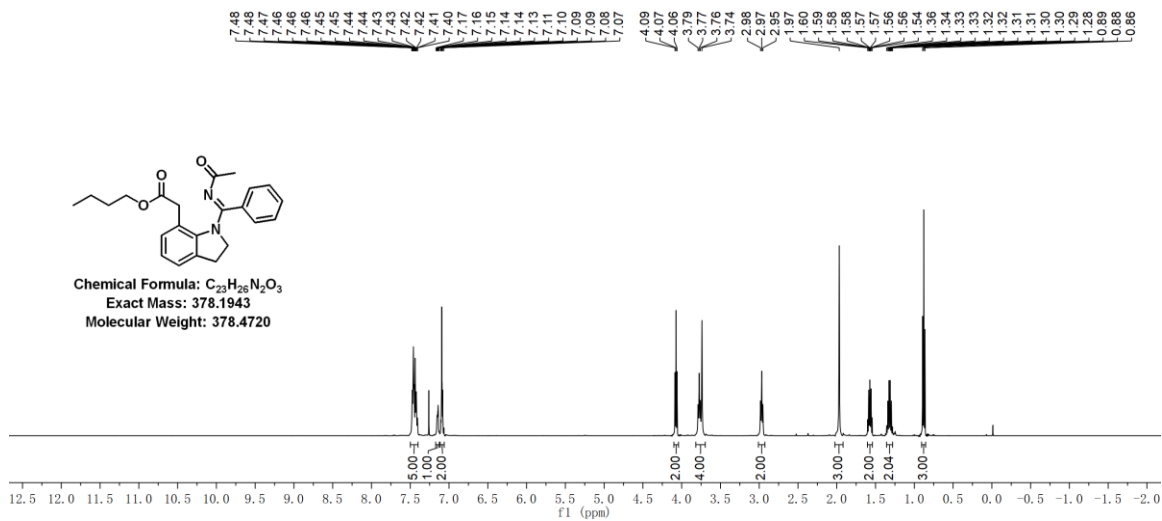

$^1\text{H}$  NMR spectrum of **5ad** (500 MHz, Chloroform-*d*)

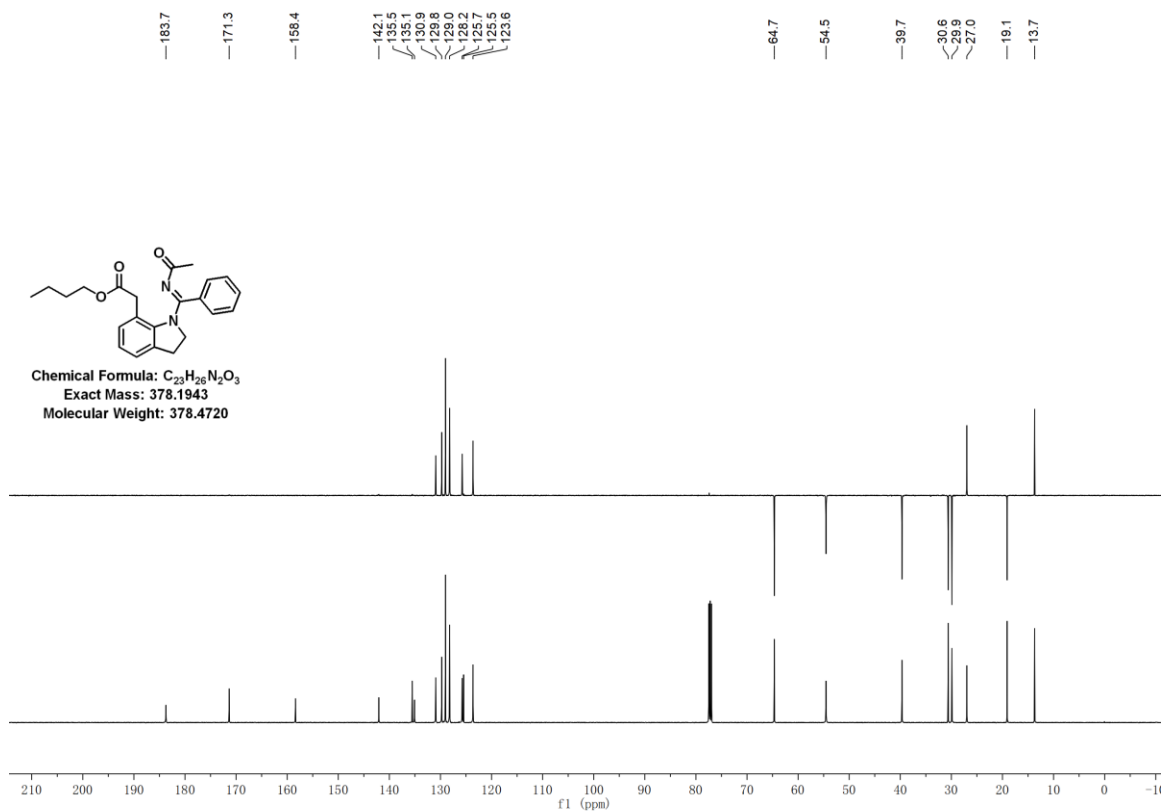

$^{13}\text{C}$  NMR spectrum of **5ad** (125 MHz, Chloroform-*d*)



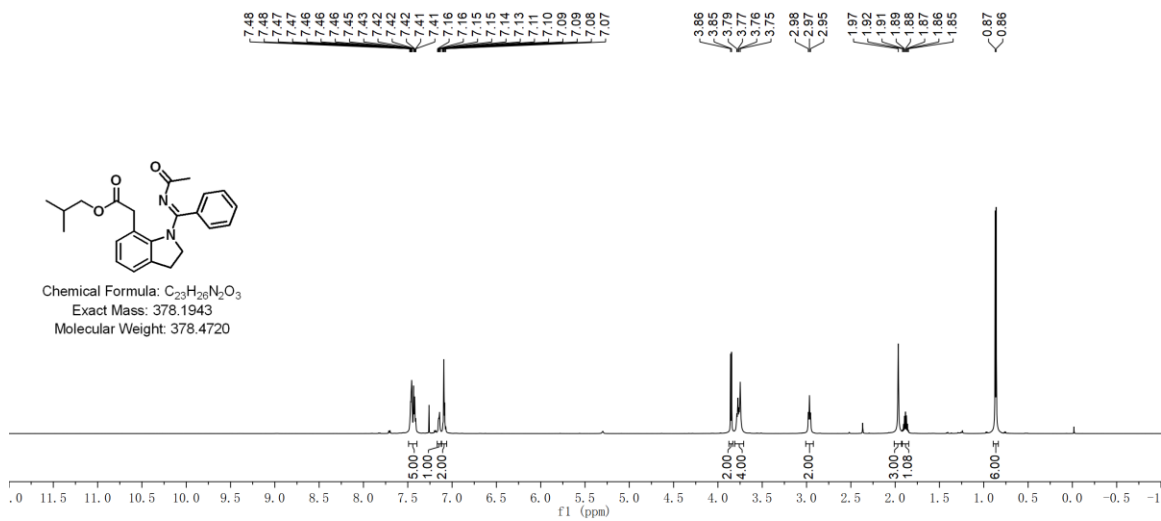

$^1\text{H}$  NMR spectrum of **5ae** (600 MHz, Chloroform-*d*)

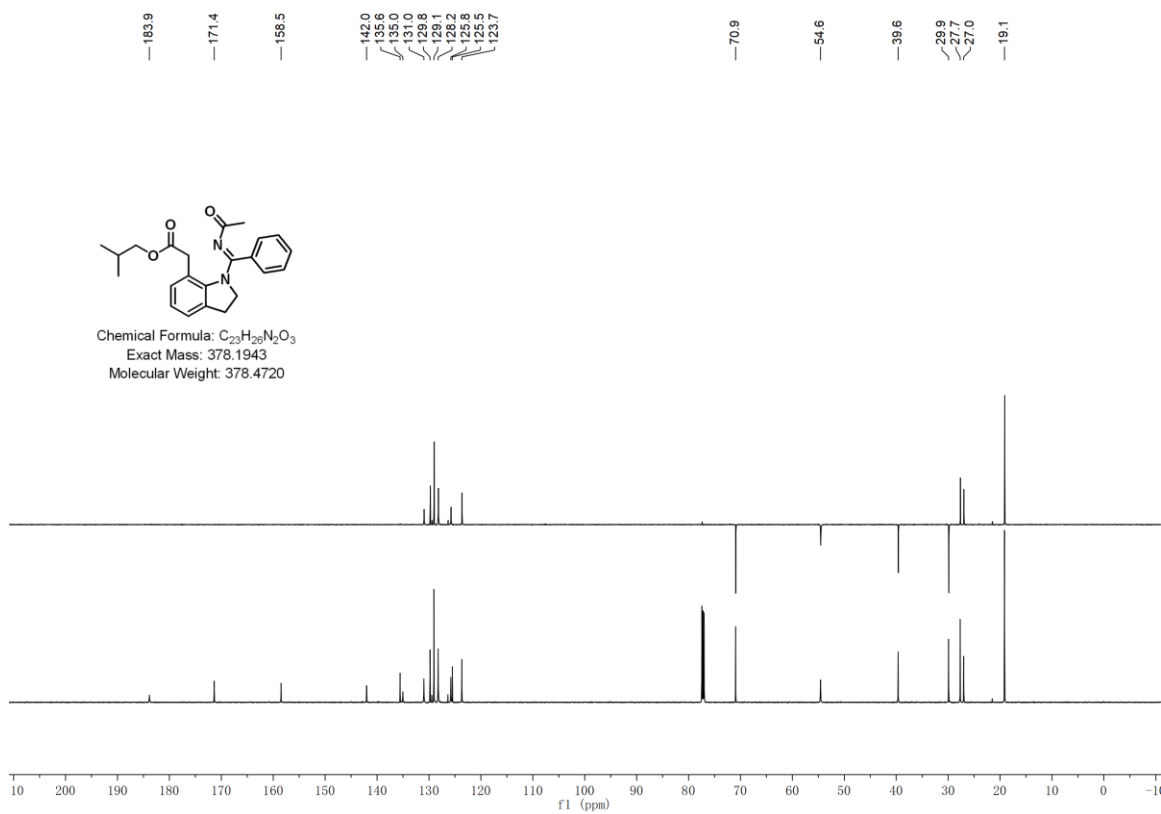

$^{13}\text{C}$  NMR spectrum of **5ae** (150 MHz, Chloroform-*d*)

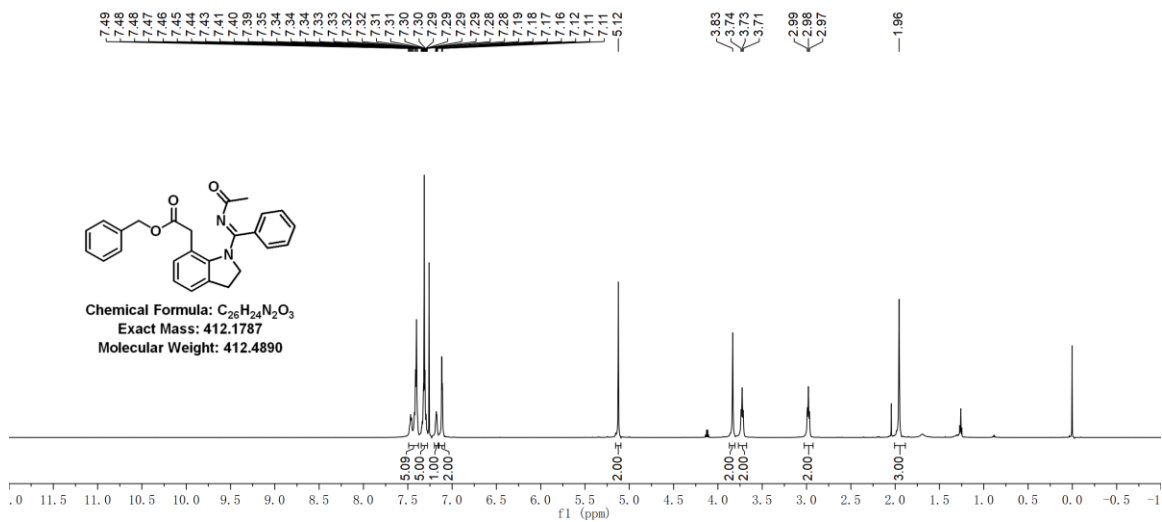

$^1\text{H}$  NMR spectrum of **5af** (600 MHz, Chloroform-*d*)

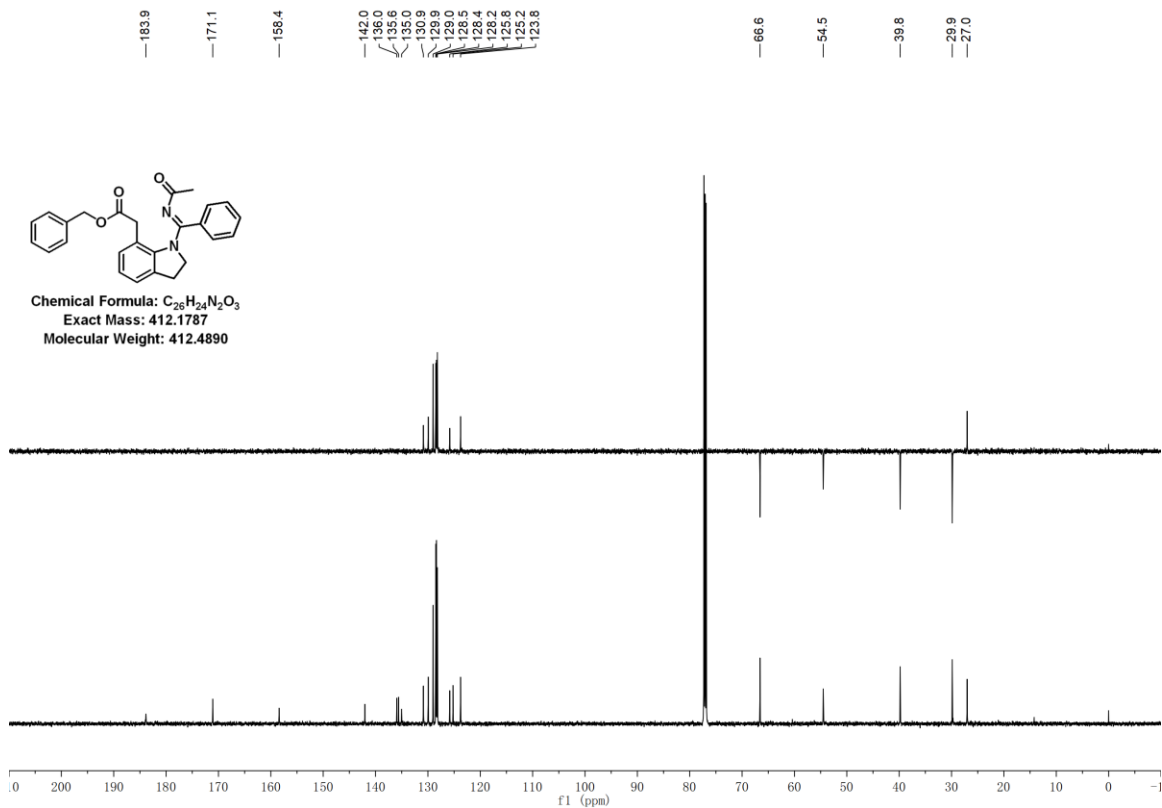

$^{13}\text{C}$  NMR spectrum of **5af** (150 MHz, Chloroform-*d*)

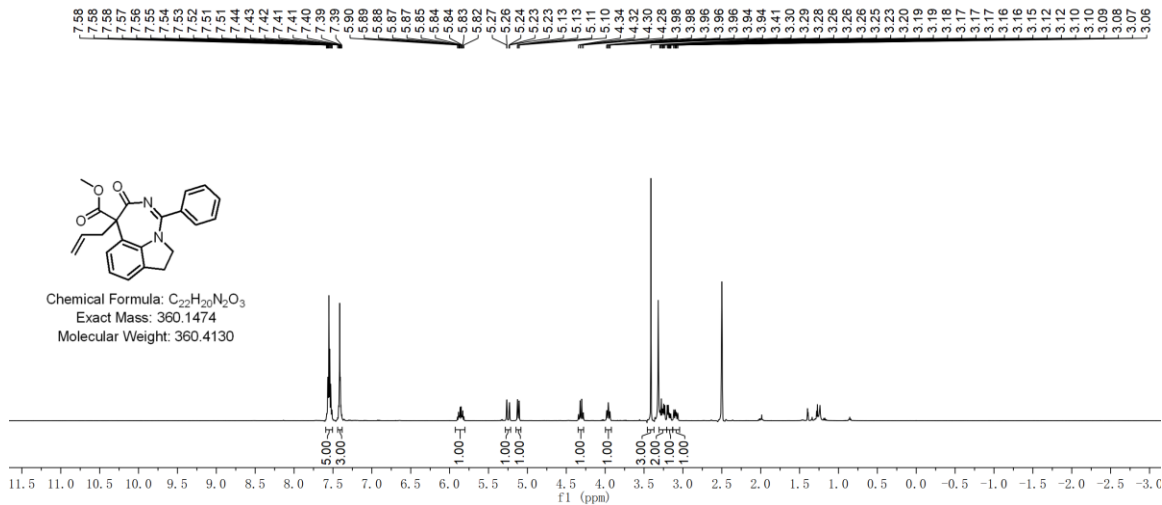

$^1\text{H}$  NMR spectrum of **6** (500 MHz,  $\text{DMSO}-d_6$ )

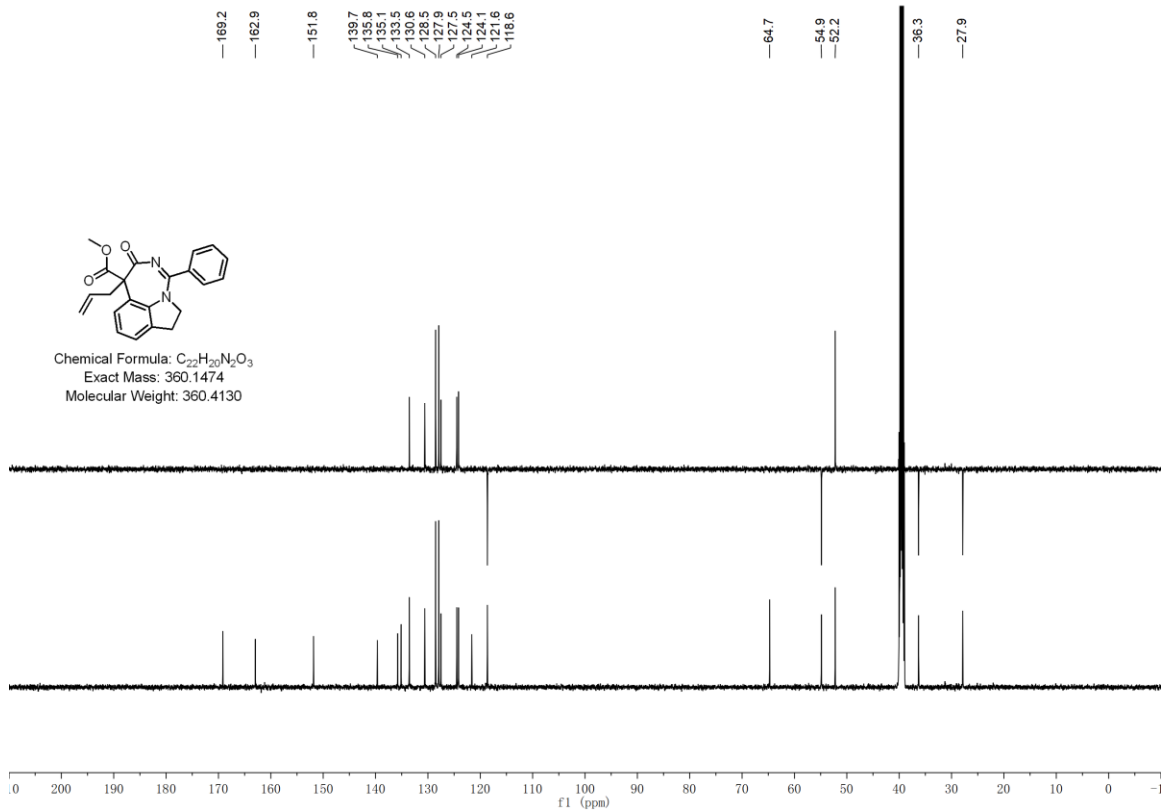

$^{13}\text{C}$  NMR spectrum of **6** (125 MHz,  $\text{DMSO}-d_6$ )



## (b) HRMS (ESI) Spectra

### User Spectra

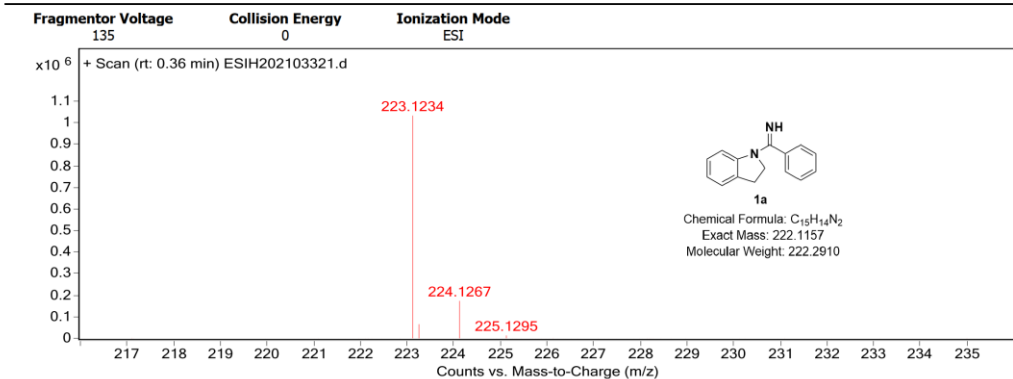

### Formula Calculator Results

| m/z      | Calc m/z | Diff (mDa) | Diff (ppm) | Ion Formula                                    | Ion                |
|----------|----------|------------|------------|------------------------------------------------|--------------------|
| 223.1234 | 223.123  | -0.4       | -1.79      | C <sub>15</sub> H <sub>11</sub> N <sub>2</sub> | (M+H) <sup>+</sup> |

## Compound 1a

### User Spectra

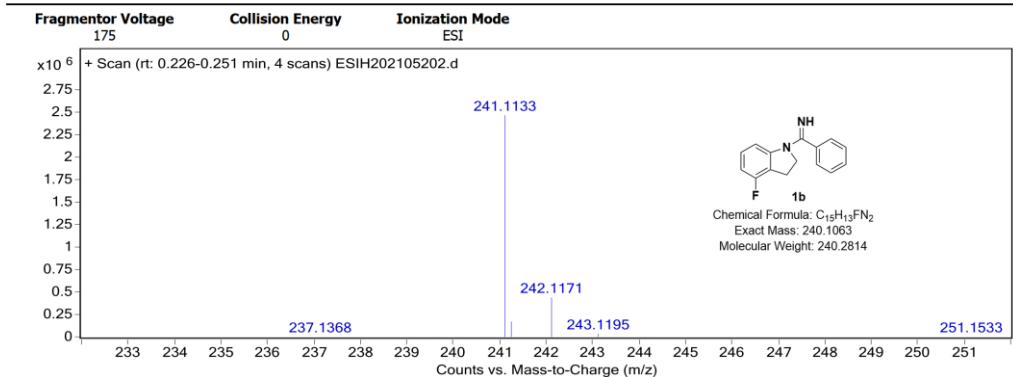

### Formula Calculator Results

| m/z      | Calc m/z | Diff (mDa) | Diff (ppm) | Ion Formula                                      | Ion                |
|----------|----------|------------|------------|--------------------------------------------------|--------------------|
| 241.1133 | 241.1136 | 0.24       | 0.99       | C <sub>15</sub> H <sub>14</sub> F N <sub>2</sub> | (M+H) <sup>+</sup> |

## Compound 1b

### User Spectra

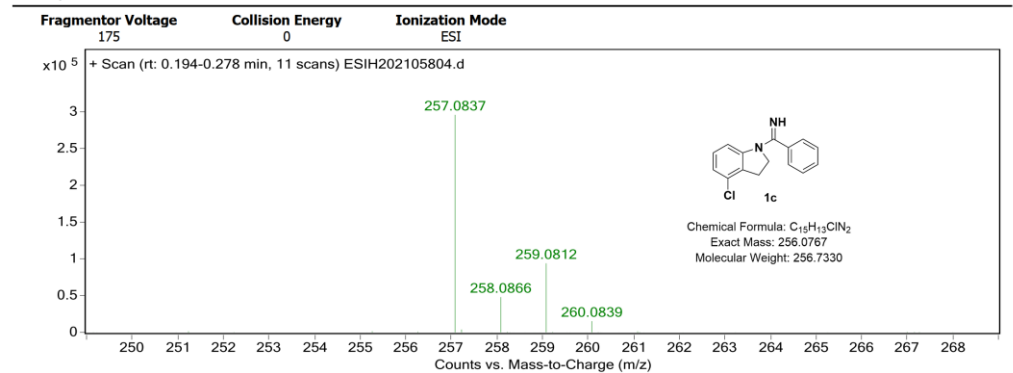

### Formula Calculator Results

| m/z      | Calc m/z | Diff (mDa) | Diff (ppm) | Ion Formula                                       | Ion                |
|----------|----------|------------|------------|---------------------------------------------------|--------------------|
| 257.0837 | 257.084  | 0.32       | 1.25       | C <sub>15</sub> H <sub>14</sub> Cl N <sub>2</sub> | (M+H) <sup>+</sup> |

## Compound 1c

## User Spectra

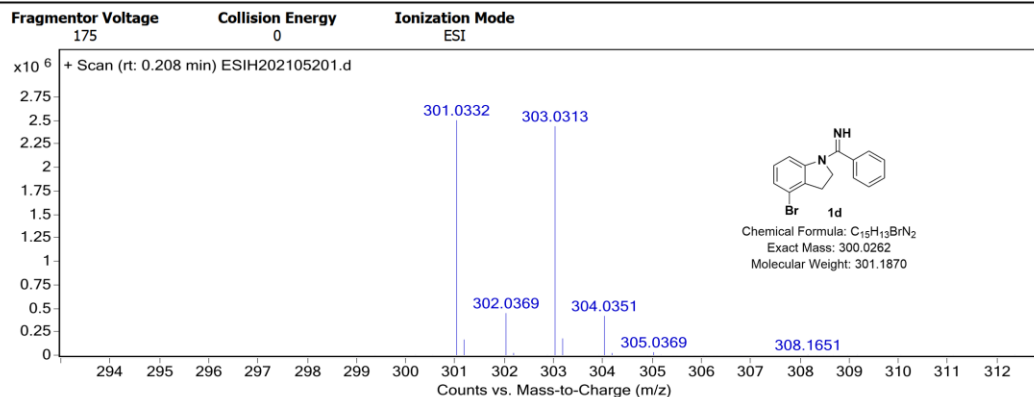

## Formula Calculator Results

| m/z      | Calc m/z | Diff (mDa) | Diff (ppm) | Ion Formula                                       | Ion                |
|----------|----------|------------|------------|---------------------------------------------------|--------------------|
| 301.0332 | 301.0335 | 0.26       | 0.85       | C <sub>15</sub> H <sub>14</sub> Br N <sub>2</sub> | (M+H) <sup>+</sup> |

## Compound 1d

## User Spectra

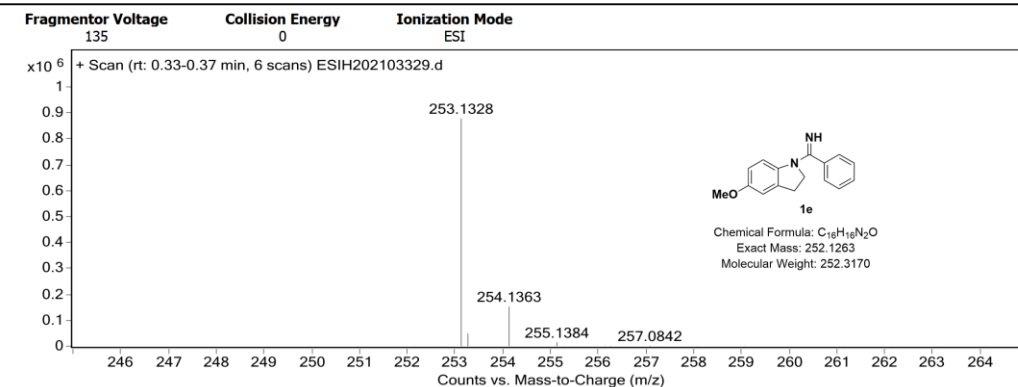

## Formula Calculator Results

| m/z      | Calc m/z | Diff (mDa) | Diff (ppm) | Ion Formula                                      | Ion                |
|----------|----------|------------|------------|--------------------------------------------------|--------------------|
| 253.1328 | 253.1335 | 0.72       | 2.85       | C <sub>16</sub> H <sub>17</sub> N <sub>2</sub> O | (M+H) <sup>+</sup> |

## Compound 1e

## User Spectra

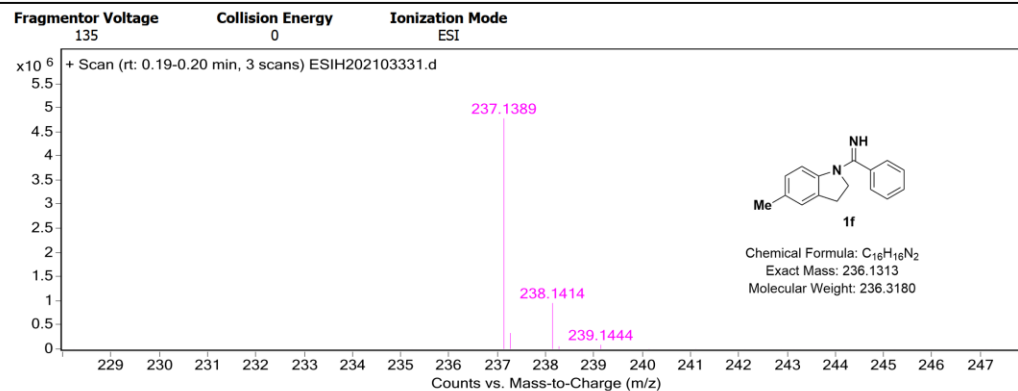

## Formula Calculator Results

| m/z      | Calc m/z | Diff (mDa) | Diff (ppm) | Ion Formula                                    | Ion                |
|----------|----------|------------|------------|------------------------------------------------|--------------------|
| 237.1389 | 237.1386 | -0.25      | -1.07      | C <sub>16</sub> H <sub>17</sub> N <sub>2</sub> | (M+H) <sup>+</sup> |

## Compound 1f

## User Spectra

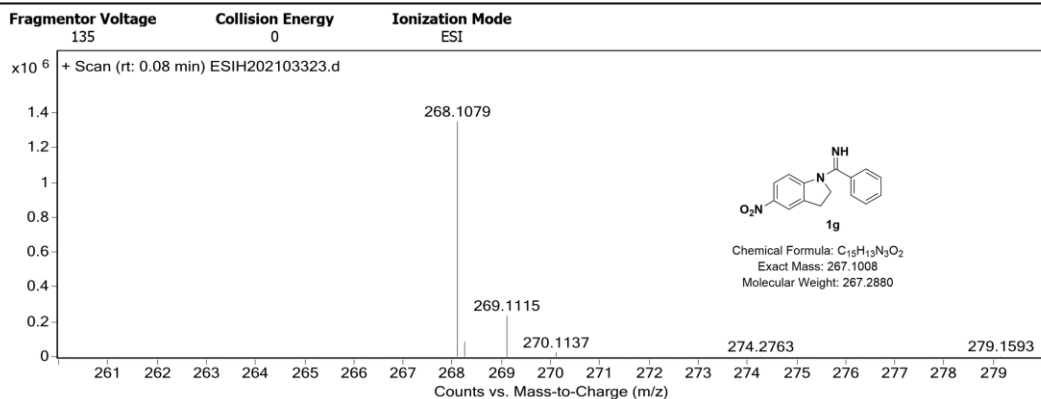

## Formula Calculator Results

| m/z      | Calc m/z | Diff (mDa) | Diff (ppm) | Ion Formula                                                   | Ion                |
|----------|----------|------------|------------|---------------------------------------------------------------|--------------------|
| 268.1079 | 268.1081 | 0.12       | 0.43       | C <sub>15</sub> H <sub>14</sub> N <sub>3</sub> O <sub>2</sub> | (M+H) <sup>+</sup> |

## Compound 1g

## User Spectra

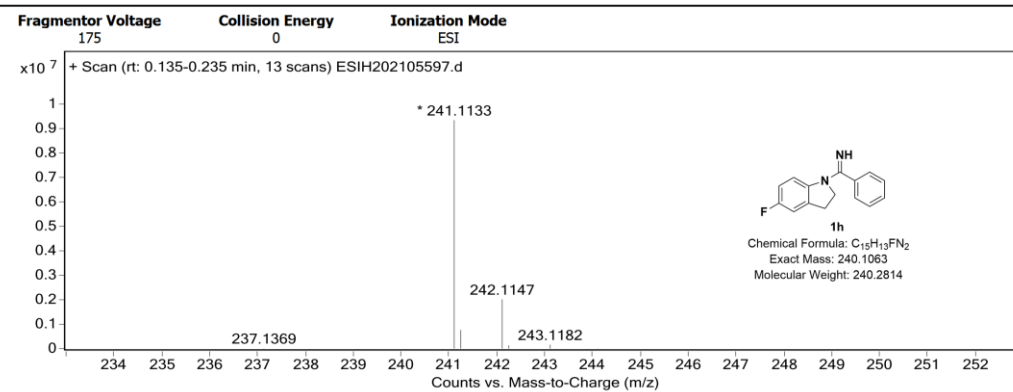

## Formula Calculator Results

| m/z      | Calc m/z | Diff (mDa) | Diff (ppm) | Ion Formula                                     | Ion                |
|----------|----------|------------|------------|-------------------------------------------------|--------------------|
| 241.1133 | 241.1136 | 0.29       | 1.2        | C <sub>15</sub> H <sub>14</sub> FN <sub>2</sub> | (M+H) <sup>+</sup> |

## Compound 1h

## User Spectra

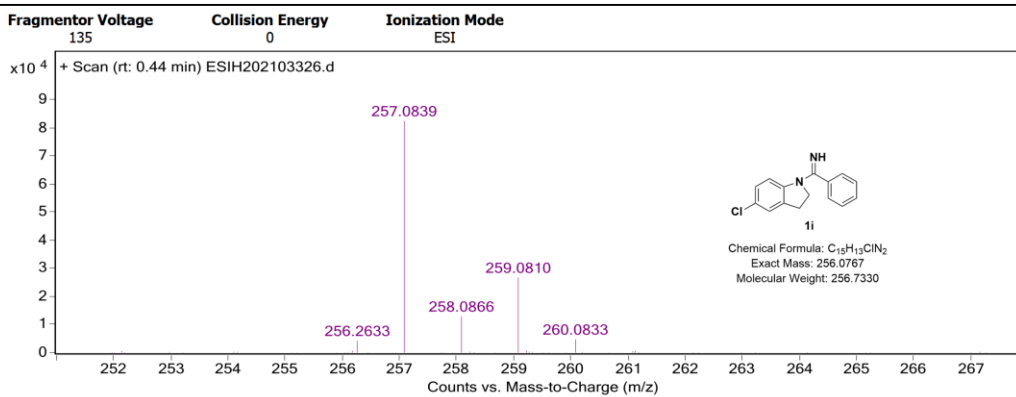

## Formula Calculator Results

| m/z      | Calc m/z | Diff (mDa) | Diff (ppm) | Ion Formula                                      | Ion                |
|----------|----------|------------|------------|--------------------------------------------------|--------------------|
| 257.0839 | 257.084  | 0.11       | 0.44       | C <sub>15</sub> H <sub>14</sub> ClN <sub>2</sub> | (M+H) <sup>+</sup> |

## Compound 1i

## User Spectra

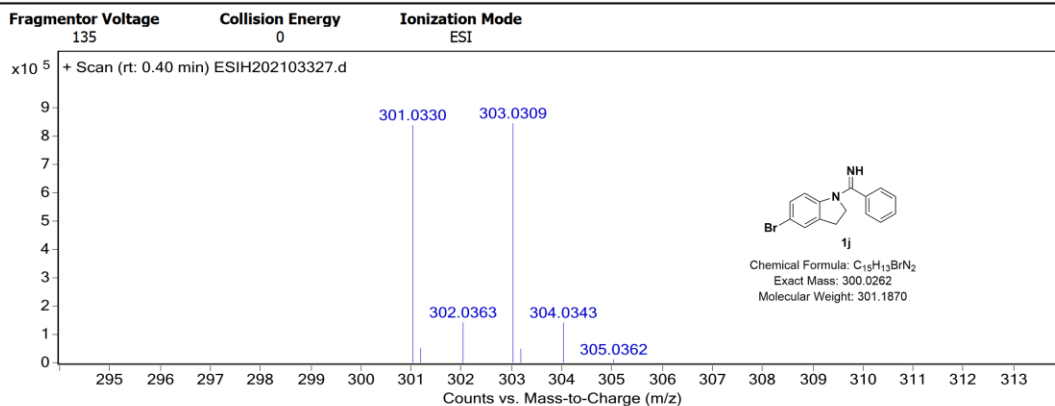

## Formula Calculator Results

| m/z     | Calc m/z | Diff (mDa) | Diff (ppm) | Ion Formula                                      | Ion                |
|---------|----------|------------|------------|--------------------------------------------------|--------------------|
| 301.033 | 301.0335 | 0.44       | 1.46       | C <sub>15</sub> H <sub>14</sub> BrN <sub>2</sub> | (M+H) <sup>+</sup> |

## Compound 1j

## User Spectra

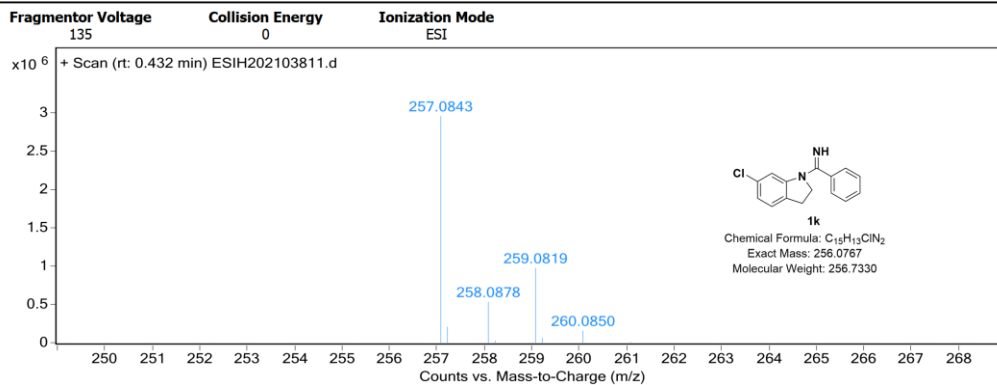

## Formula Calculator Results

| m/z      | Calc m/z | Diff (mDa) | Diff (ppm) | Ion Formula                                      | Ion                |
|----------|----------|------------|------------|--------------------------------------------------|--------------------|
| 257.0843 | 257.084  | -0.28      | -1.08      | C <sub>15</sub> H <sub>14</sub> ClN <sub>2</sub> | (M+H) <sup>+</sup> |

## Compound 1k

## User Spectra

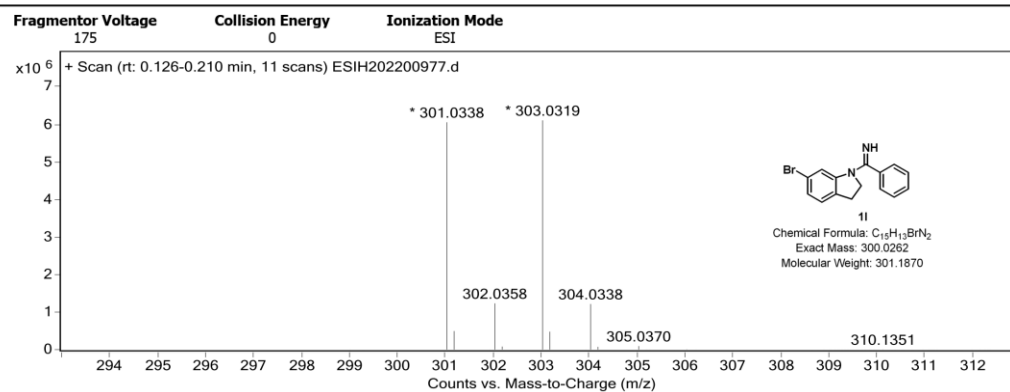

## Formula Calculator Results

| m/z      | Calc m/z | Diff (mDa) | Diff (ppm) | Ion Formula                                      | Ion                |
|----------|----------|------------|------------|--------------------------------------------------|--------------------|
| 301.0338 | 301.0335 | -0.35      | -1.15      | C <sub>15</sub> H <sub>14</sub> BrN <sub>2</sub> | (M+H) <sup>+</sup> |

## Compound 1l



User Spectra

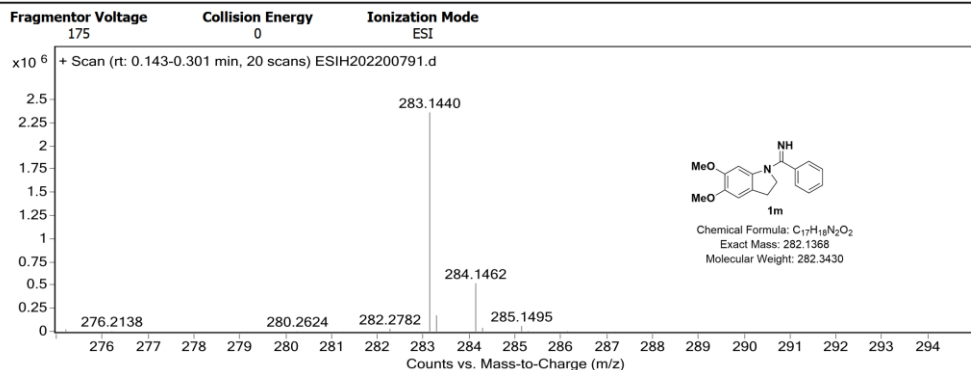

Formula Calculator Results

| m/z     | Calc m/z | Diff (mDa) | Diff (ppm) | Ion Formula                                                   | Ion                |
|---------|----------|------------|------------|---------------------------------------------------------------|--------------------|
| 283.144 | 283.1441 | 0.15       | 0.53       | C <sub>17</sub> H <sub>19</sub> N <sub>2</sub> O <sub>2</sub> | (M+H) <sup>+</sup> |

### Compound 1m

User Spectra

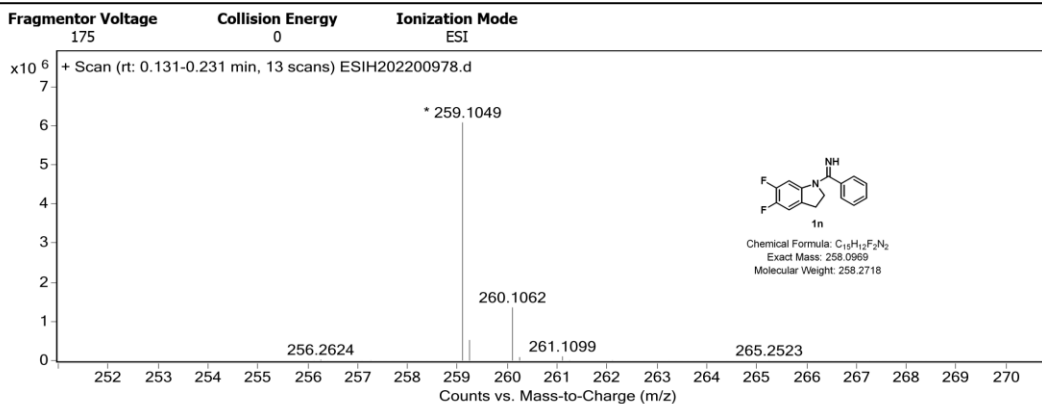

Formula Calculator Results

| m/z      | Calc m/z | Diff (mDa) | Diff (ppm) | Ion Formula                                                   | Ion                |
|----------|----------|------------|------------|---------------------------------------------------------------|--------------------|
| 259.1049 | 259.1041 | -0.74      | -2.87      | C <sub>15</sub> H <sub>13</sub> F <sub>2</sub> N <sub>2</sub> | (M+H) <sup>+</sup> |

### Compound 1n

User Spectra

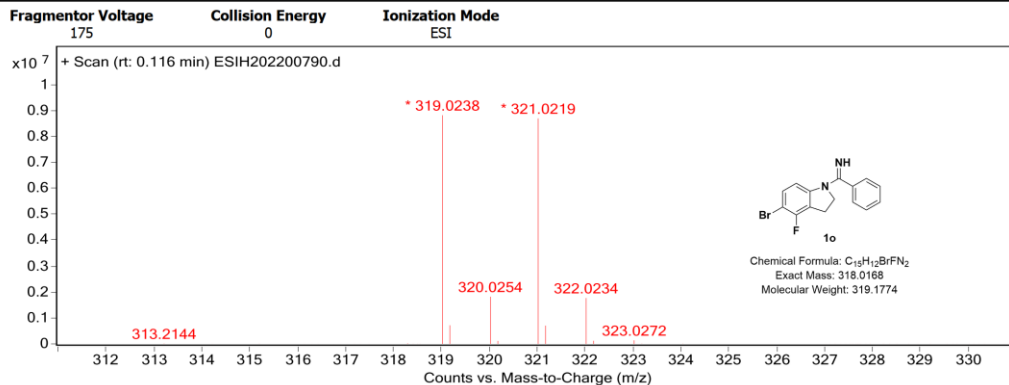

Formula Calculator Results

| m/z      | Calc m/z | Diff (mDa) | Diff (ppm) | Ion Formula                                         | Ion                |
|----------|----------|------------|------------|-----------------------------------------------------|--------------------|
| 319.0238 | 319.0241 | 0.25       | 0.77       | C <sub>15</sub> H <sub>13</sub> Br F N <sub>2</sub> | (M+H) <sup>+</sup> |

### Compound 1o

## User Spectra

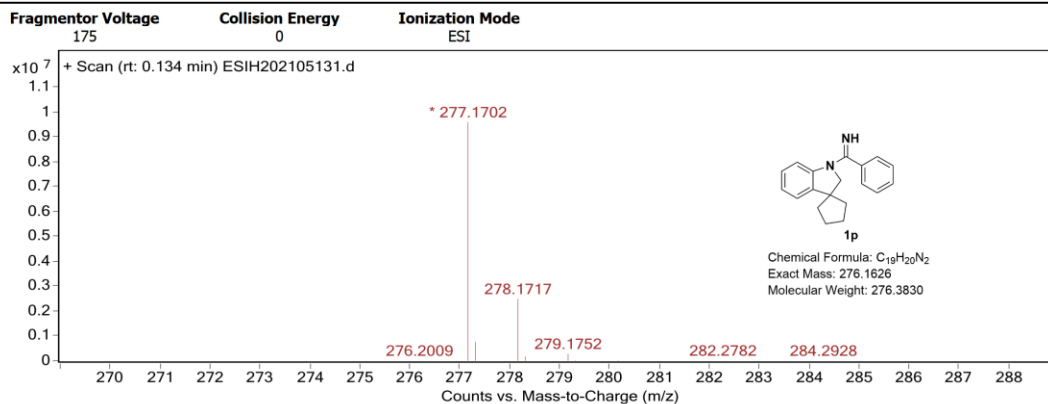

## Formula Calculator Results

| m/z      | Calc m/z | Diff (mDa) | Diff (ppm) | Ion Formula                                    | Ion                |
|----------|----------|------------|------------|------------------------------------------------|--------------------|
| 277.1702 | 277.1699 | -0.29      | -1.03      | C <sub>19</sub> H <sub>21</sub> N <sub>2</sub> | (M+H) <sup>+</sup> |

## Compound 1p

## User Spectra

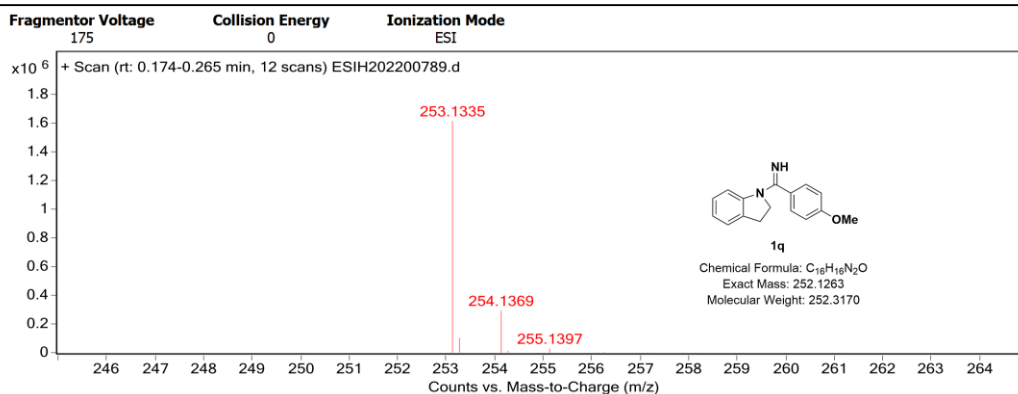

## Formula Calculator Results

| m/z      | Calc m/z | Diff (mDa) | Diff (ppm) | Ion Formula                                      | Ion                |
|----------|----------|------------|------------|--------------------------------------------------|--------------------|
| 253.1335 | 253.1335 | 0.06       | 0.23       | C <sub>16</sub> H <sub>17</sub> N <sub>2</sub> O | (M+H) <sup>+</sup> |

## Compound 1q

## User Spectra

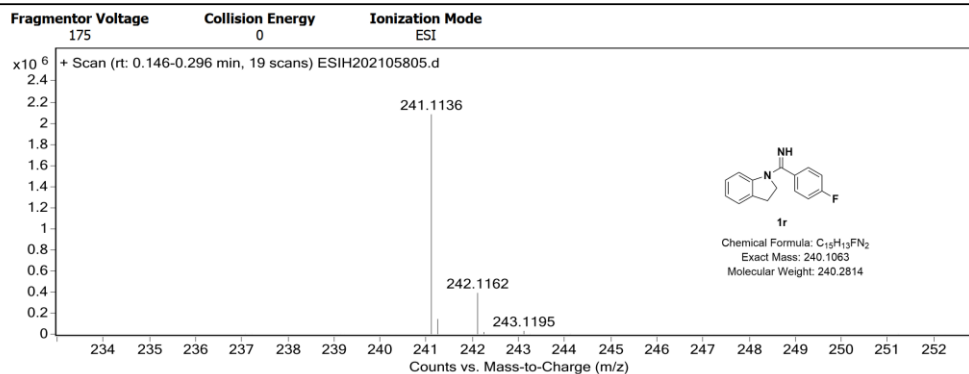

## Formula Calculator Results

| m/z      | Calc m/z | Diff (mDa) | Diff (ppm) | Ion Formula                                      | Ion                |
|----------|----------|------------|------------|--------------------------------------------------|--------------------|
| 241.1136 | 241.1136 | -0.08      | -0.35      | C <sub>15</sub> H <sub>14</sub> F N <sub>2</sub> | (M+H) <sup>+</sup> |

## Compound 1r

User Spectra

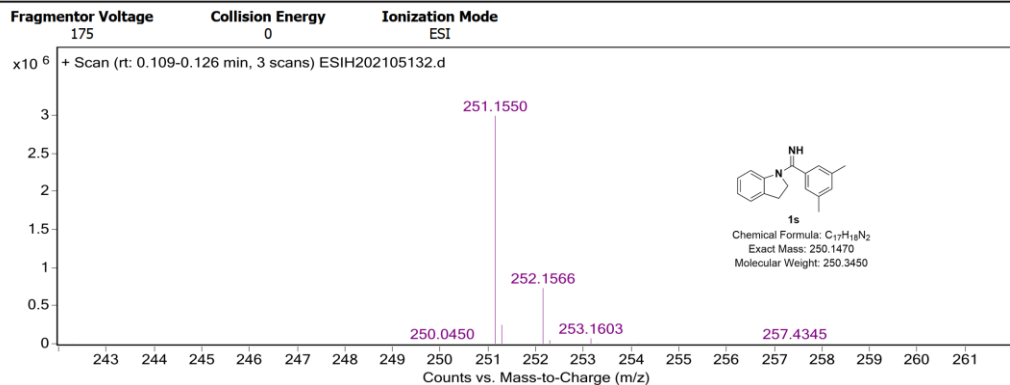

Formula Calculator Results

| m/z     | Calc m/z | Diff (mDa) | Diff (ppm) | Ion Formula                                    | Ion                |
|---------|----------|------------|------------|------------------------------------------------|--------------------|
| 251.155 | 251.1543 | -0.68      | -2.71      | C <sub>17</sub> H <sub>19</sub> N <sub>2</sub> | (M+H) <sup>+</sup> |

### Compound 1s

User Spectra

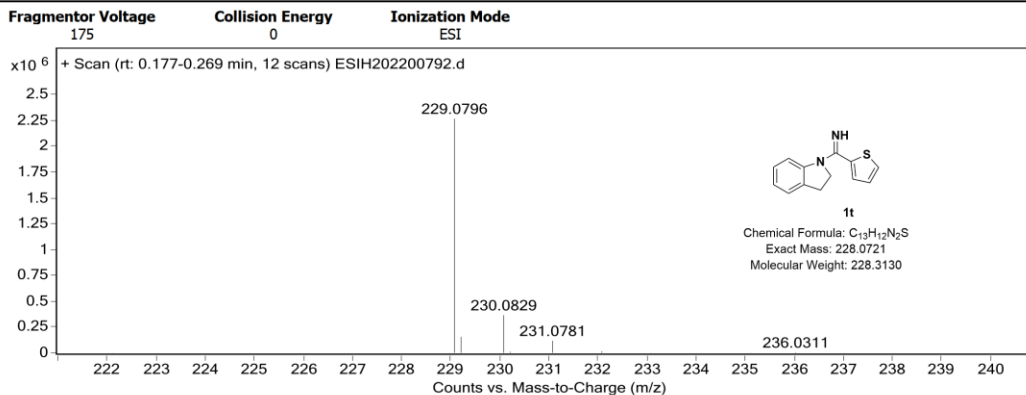

Formula Calculator Results

| m/z      | Calc m/z | Diff (mDa) | Diff (ppm) | Ion Formula                                      | Ion                |
|----------|----------|------------|------------|--------------------------------------------------|--------------------|
| 229.0796 | 229.0794 | -0.17      | -0.74      | C <sub>13</sub> H <sub>13</sub> N <sub>2</sub> S | (M+H) <sup>+</sup> |

### Compound 1t

User Spectra

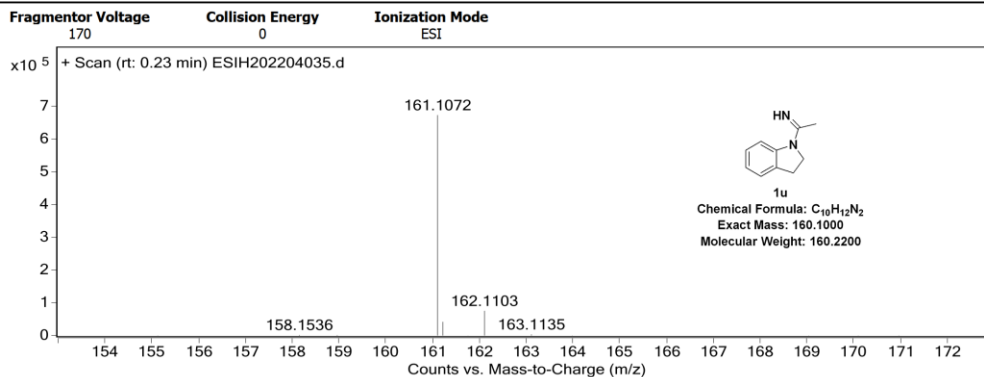

Formula Calculator Results

| m/z      | Calc m/z | Diff (mDa) | Diff (ppm) | Ion Formula                                    | Ion                |
|----------|----------|------------|------------|------------------------------------------------|--------------------|
| 161.1072 | 161.1073 | 0.14       | 0.84       | C <sub>10</sub> H <sub>13</sub> N <sub>2</sub> | (M+H) <sup>+</sup> |

### Compound 1u

## User Spectra

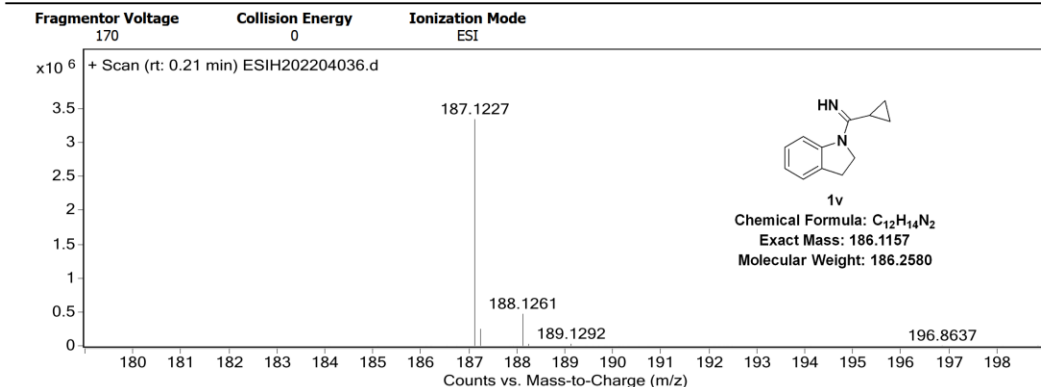

## Formula Calculator Results

| m/z      | Calc m/z | Diff (mDa) | Diff (ppm) | Ion Formula                                    | Ion                |
|----------|----------|------------|------------|------------------------------------------------|--------------------|
| 187.1227 | 187.123  | 0.29       | 1.53       | C <sub>12</sub> H <sub>15</sub> N <sub>2</sub> | (M+H) <sup>+</sup> |

## Compound 1v

## User Spectra

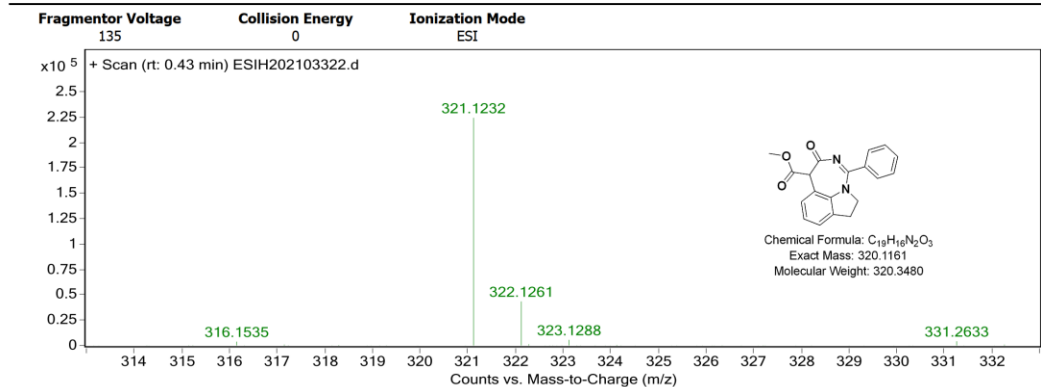

## Formula Calculator Results

| m/z      | Calc m/z | Diff (mDa) | Diff (ppm) | Ion Formula                                                   | Ion                |
|----------|----------|------------|------------|---------------------------------------------------------------|--------------------|
| 321.1232 | 321.1234 | 0.13       | 0.39       | C <sub>19</sub> H <sub>17</sub> N <sub>2</sub> O <sub>3</sub> | (M+H) <sup>+</sup> |

## Compound 3aa

## Spectra

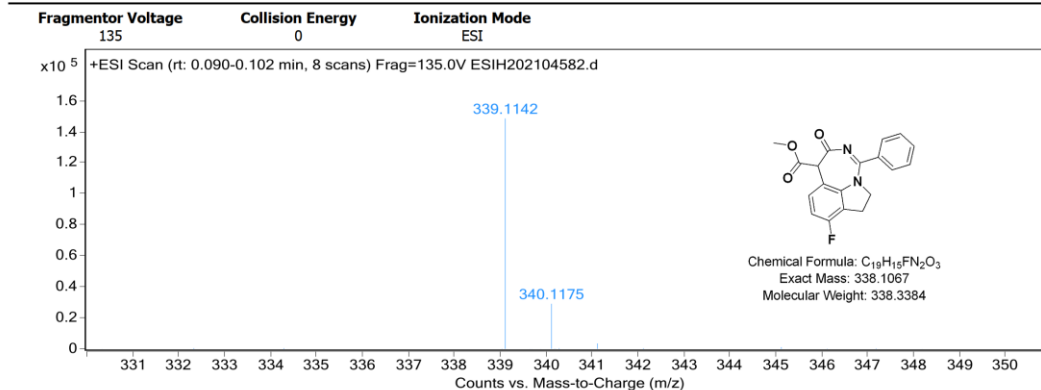

## Formula Calculator Results

| m/z      | Calc m/z | Diff (mDa) | Diff (ppm) | Ion Formula                                                     | Ion                |
|----------|----------|------------|------------|-----------------------------------------------------------------|--------------------|
| 339.1142 | 339.1139 | -0.27      | -0.78      | C <sub>19</sub> H <sub>16</sub> F N <sub>2</sub> O <sub>3</sub> | (M+H) <sup>+</sup> |

## Compound 3ba

## User Spectra

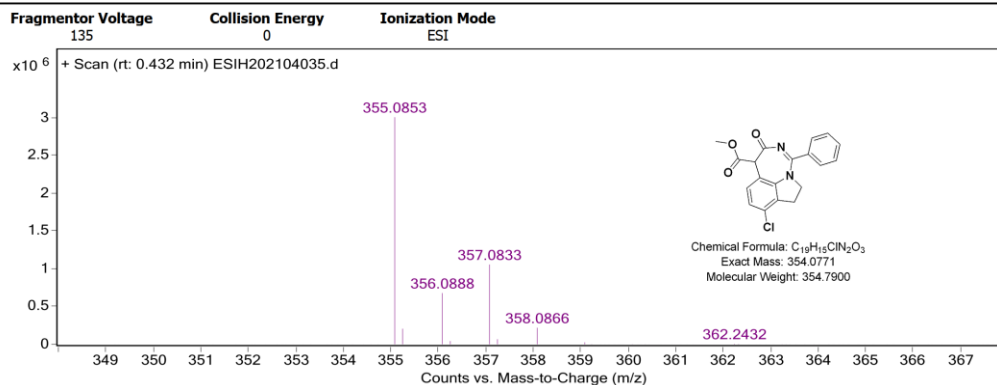

## Formula Calculator Results

| m/z      | Calc m/z | Diff (mDa) | Diff (ppm) | Ion Formula                                                      | Ion                |
|----------|----------|------------|------------|------------------------------------------------------------------|--------------------|
| 355.0853 | 355.0844 | -0.94      | -2.65      | C <sub>19</sub> H <sub>16</sub> Cl N <sub>2</sub> O <sub>3</sub> | (M+H) <sup>+</sup> |

## Compound 3ca

## User Spectra

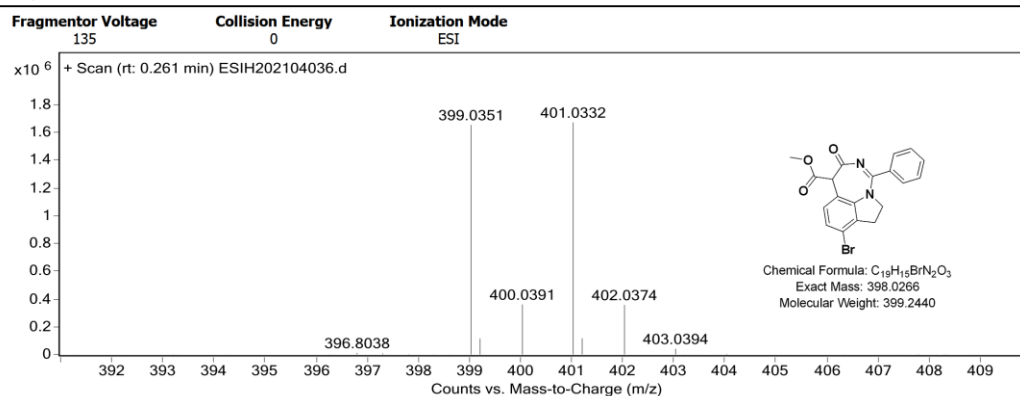

## Formula Calculator Results

| m/z      | Calc m/z | Diff (mDa) | Diff (ppm) | Ion Formula                                                      | Ion                |
|----------|----------|------------|------------|------------------------------------------------------------------|--------------------|
| 399.0351 | 399.0339 | -1.19      | -2.97      | C <sub>19</sub> H <sub>16</sub> Br N <sub>2</sub> O <sub>3</sub> | (M+H) <sup>+</sup> |

## Compound 3da

## User Spectra

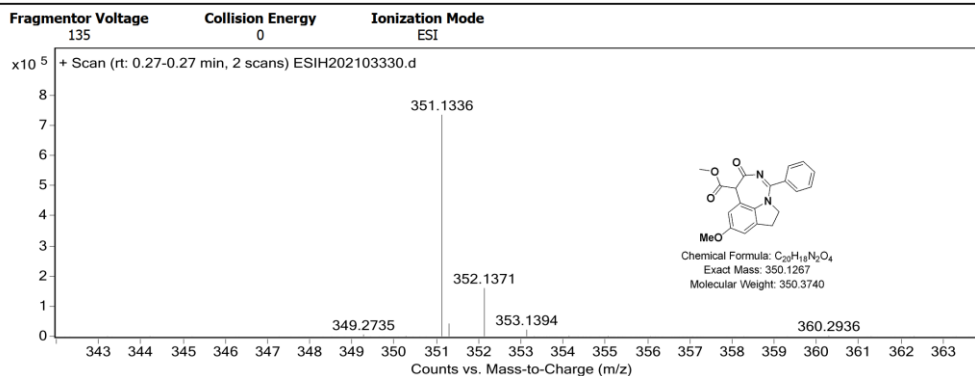

## Formula Calculator Results

| m/z      | Calc m/z | Diff (mDa) | Diff (ppm) | Ion Formula                                                   | Ion                |
|----------|----------|------------|------------|---------------------------------------------------------------|--------------------|
| 351.1336 | 351.1339 | 0.31       | 0.87       | C <sub>20</sub> H <sub>19</sub> N <sub>2</sub> O <sub>4</sub> | (M+H) <sup>+</sup> |

## Compound 3ea

## User Spectra

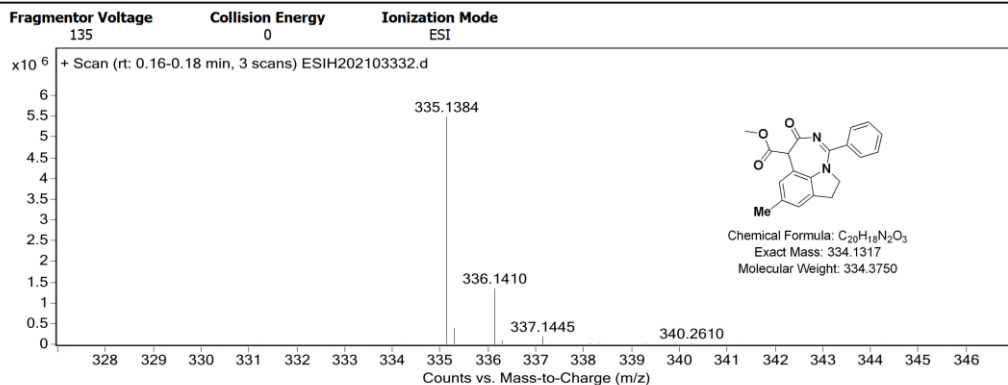

## Formula Calculator Results

| m/z      | Calc m/z | Diff (mDa) | Diff (ppm) | Ion Formula                                                   | Ion                |
|----------|----------|------------|------------|---------------------------------------------------------------|--------------------|
| 335.1384 | 335.139  | 0.65       | 1.94       | C <sub>20</sub> H <sub>19</sub> N <sub>2</sub> O <sub>3</sub> | (M+H) <sup>+</sup> |

## Compound 3fa

## User Spectra

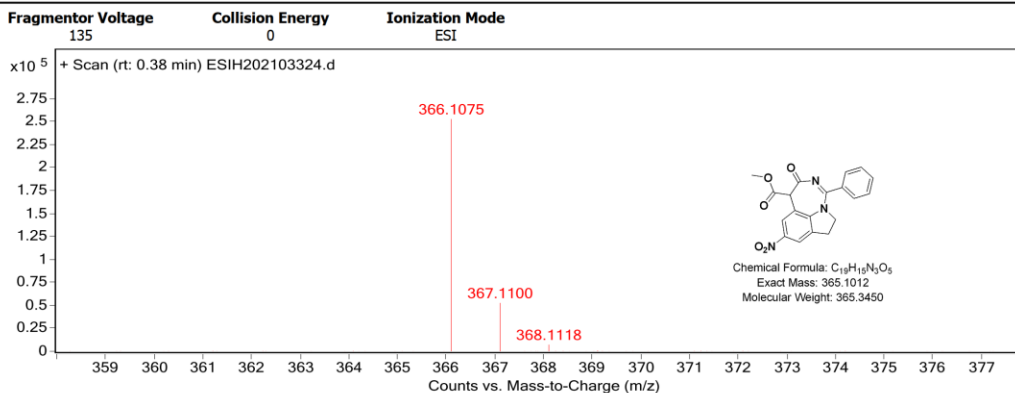

## Formula Calculator Results

| m/z      | Calc m/z | Diff (mDa) | Diff (ppm) | Ion Formula                                                   | Ion                |
|----------|----------|------------|------------|---------------------------------------------------------------|--------------------|
| 366.1075 | 366.1084 | 0.94       | 2.56       | C <sub>19</sub> H <sub>16</sub> N <sub>3</sub> O <sub>5</sub> | (M+H) <sup>+</sup> |

## Compound 3ga

## User Spectra

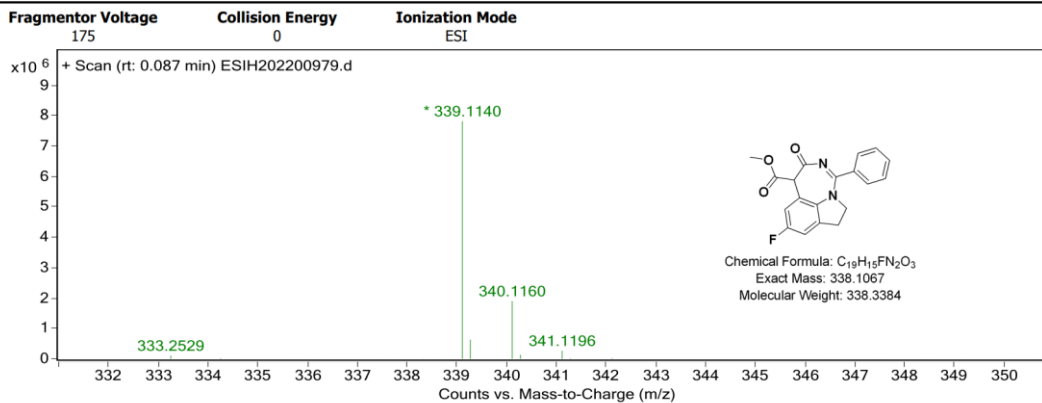

## Formula Calculator Results

| m/z     | Calc m/z | Diff (mDa) | Diff (ppm) | Ion Formula                                                     | Ion                |
|---------|----------|------------|------------|-----------------------------------------------------------------|--------------------|
| 339.114 | 339.1139 | -0.06      | -0.17      | C <sub>19</sub> H <sub>15</sub> F N <sub>2</sub> O <sub>3</sub> | (M+H) <sup>+</sup> |

## Compound 3ha

## User Spectra

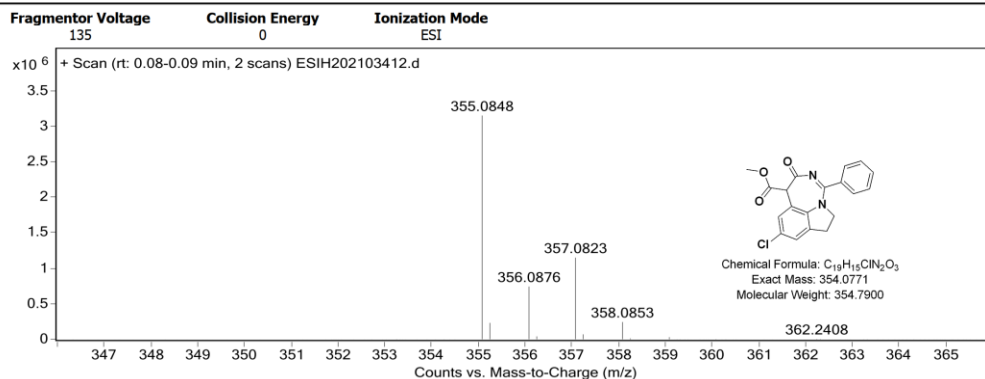

## Formula Calculator Results

| m/z      | Calc m/z | Diff (mDa) | Diff (ppm) | Ion Formula                                                      | Ion                |
|----------|----------|------------|------------|------------------------------------------------------------------|--------------------|
| 355.0848 | 355.0844 | -0.43      | -1.21      | C <sub>19</sub> H <sub>16</sub> Cl N <sub>2</sub> O <sub>3</sub> | (M+H) <sup>+</sup> |

## Compound 3ia

## User Spectra

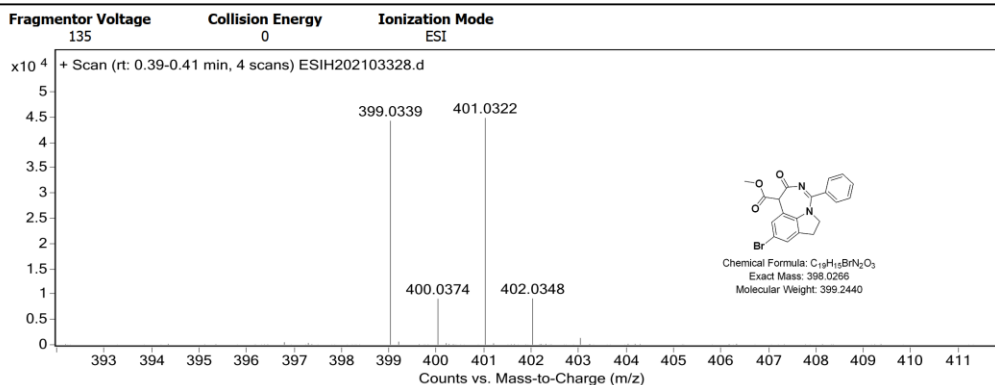

## Formula Calculator Results

| m/z      | Calc m/z | Diff (mDa) | Diff (ppm) | Ion Formula                                                      | Ion                |
|----------|----------|------------|------------|------------------------------------------------------------------|--------------------|
| 399.0339 | 399.0339 | -0.06      | -0.14      | C <sub>19</sub> H <sub>16</sub> Br N <sub>2</sub> O <sub>3</sub> | (M+H) <sup>+</sup> |

## Compound 3ja

## User Spectra

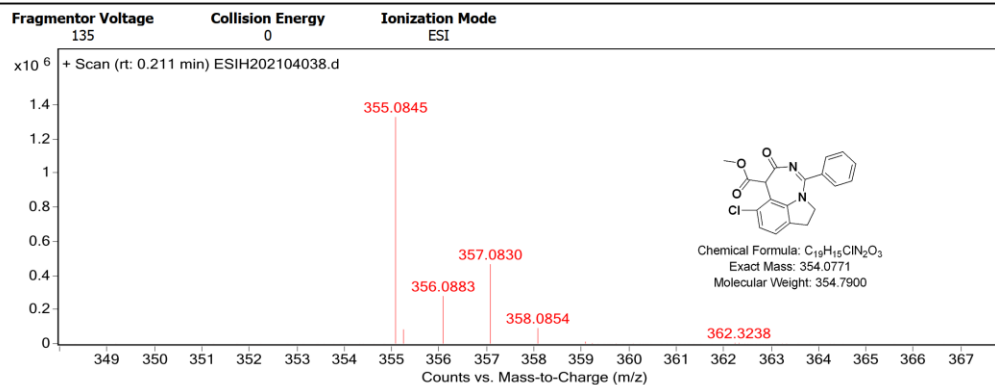

## Formula Calculator Results

| m/z      | Calc m/z | Diff (mDa) | Diff (ppm) | Ion Formula                                                      | Ion                |
|----------|----------|------------|------------|------------------------------------------------------------------|--------------------|
| 355.0845 | 355.0844 | -0.09      | -0.27      | C <sub>19</sub> H <sub>16</sub> Cl N <sub>2</sub> O <sub>3</sub> | (M+H) <sup>+</sup> |

## Compound 3ka

User Spectra

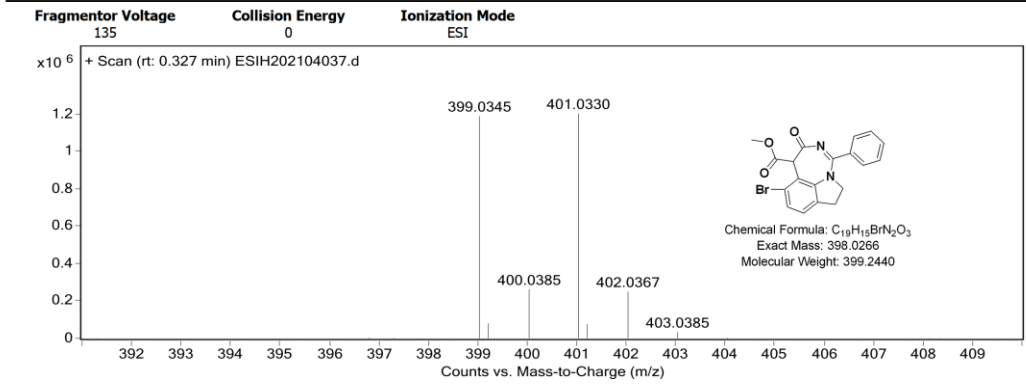

Formula Calculator Results

| m/z      | Calc m/z | Diff (mDa) | Diff (ppm) | Ion Formula                                                     | Ion                |
|----------|----------|------------|------------|-----------------------------------------------------------------|--------------------|
| 399.0345 | 399.0339 | -0.63      | -1.57      | C <sub>19</sub> H <sub>16</sub> BrN <sub>2</sub> O <sub>3</sub> | (M+H) <sup>+</sup> |

### Compound 3la

Spectra

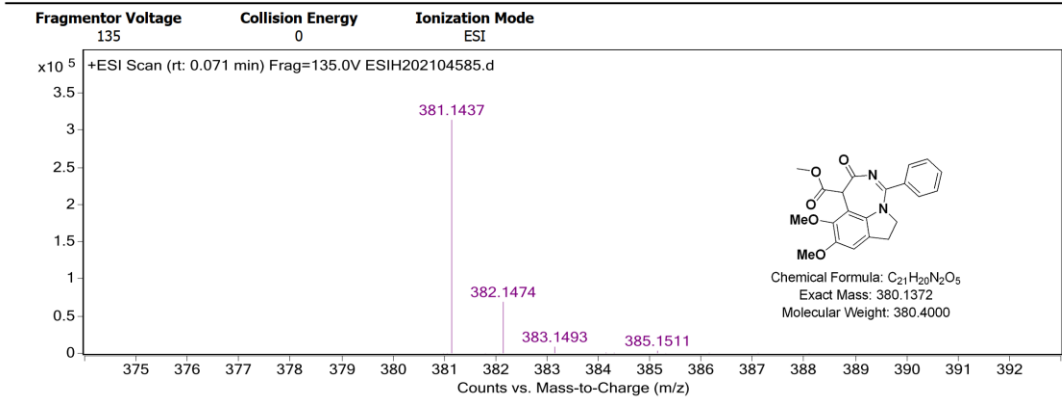

Formula Calculator Results

| m/z      | Calc m/z | Diff (mDa) | Diff (ppm) | Ion Formula                                                   | Ion                |
|----------|----------|------------|------------|---------------------------------------------------------------|--------------------|
| 381.1437 | 381.1445 | 0.76       | 2          | C <sub>21</sub> H <sub>21</sub> N <sub>2</sub> O <sub>5</sub> | (M+H) <sup>+</sup> |

### Compound 3ma

User Spectra

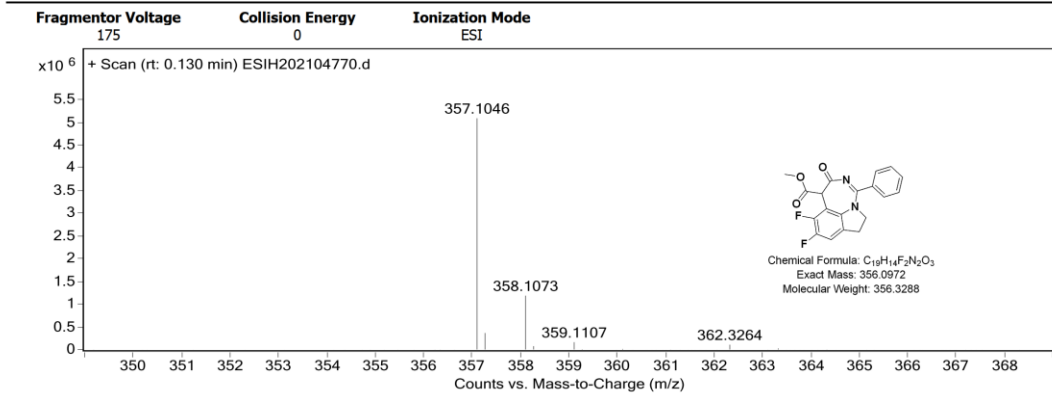

Formula Calculator Results

| m/z      | Calc m/z | Diff (mDa) | Diff (ppm) | Ion Formula                                                                  | Ion                |
|----------|----------|------------|------------|------------------------------------------------------------------------------|--------------------|
| 357.1046 | 357.1045 | -0.08      | -0.21      | C <sub>19</sub> H <sub>15</sub> F <sub>2</sub> N <sub>2</sub> O <sub>3</sub> | (M+H) <sup>+</sup> |

### Compound 3na



## User Spectra

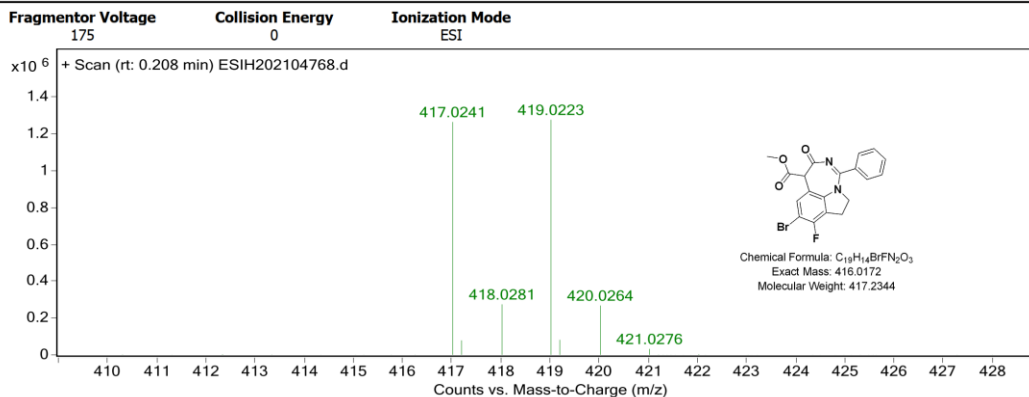

## Formula Calculator Results

| m/z      | Calc m/z | Diff (mDa) | Diff (ppm) | Ion Formula                                                        | Ion                |
|----------|----------|------------|------------|--------------------------------------------------------------------|--------------------|
| 417.0241 | 417.0245 | 0.32       | 0.76       | C <sub>19</sub> H <sub>15</sub> Br F N <sub>2</sub> O <sub>3</sub> | (M+H) <sup>+</sup> |

## Compound 30a

## User Spectra

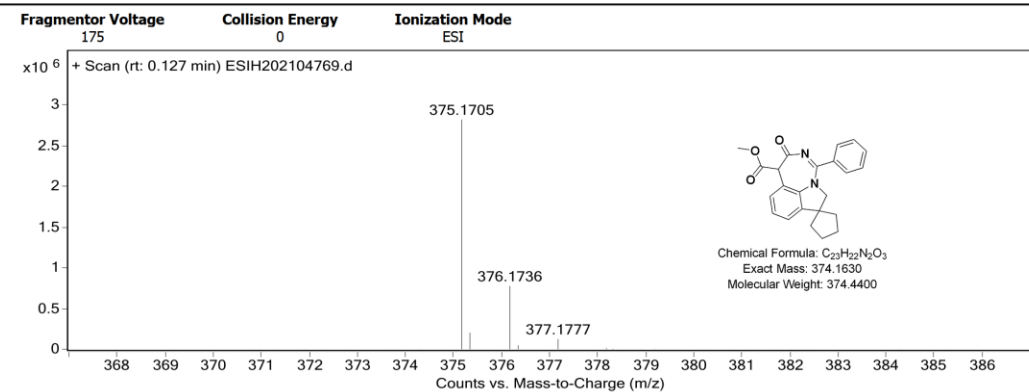

## Formula Calculator Results

| m/z      | Calc m/z | Diff (mDa) | Diff (ppm) | Ion Formula                                                   | Ion                |
|----------|----------|------------|------------|---------------------------------------------------------------|--------------------|
| 375.1705 | 375.1703 | -0.16      | -0.42      | C <sub>23</sub> H <sub>23</sub> N <sub>2</sub> O <sub>3</sub> | (M+H) <sup>+</sup> |

## Compound 3pa

## User Spectra

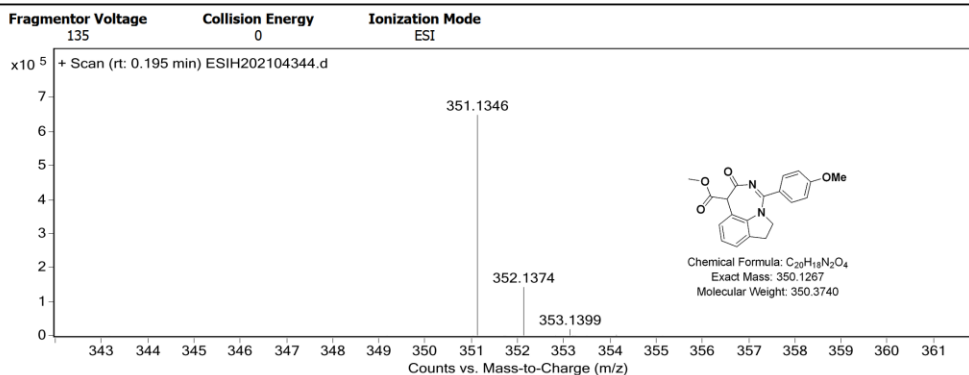

## Formula Calculator Results

| m/z      | Calc m/z | Diff (mDa) | Diff (ppm) | Ion Formula                                                   | Ion                |
|----------|----------|------------|------------|---------------------------------------------------------------|--------------------|
| 351.1346 | 351.1339 | -0.63      | -1.8       | C <sub>20</sub> H <sub>19</sub> N <sub>2</sub> O <sub>4</sub> | (M+H) <sup>+</sup> |

## Compound 3qa

## User Spectra

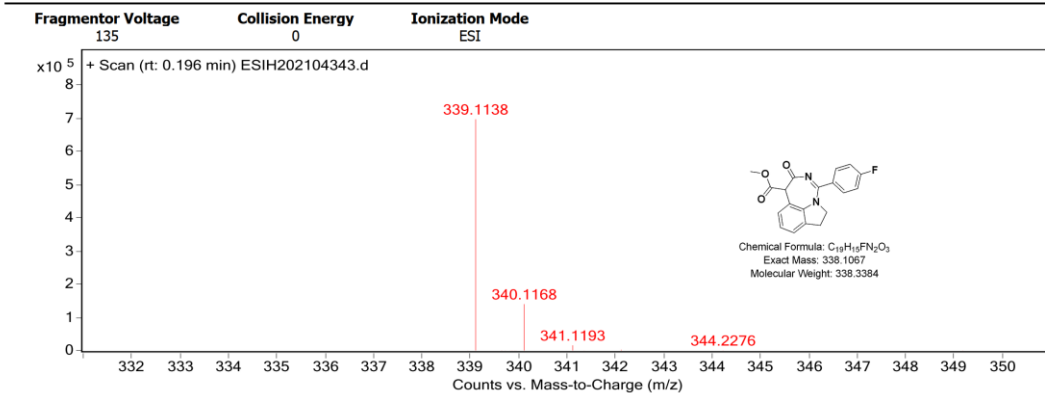

## Formula Calculator Results

| m/z      | Calc m/z | Diff (mDa) | Diff (ppm) | Ion Formula                                                     | Ion                |
|----------|----------|------------|------------|-----------------------------------------------------------------|--------------------|
| 339.1138 | 339.1139 | 0.11       | 0.34       | C <sub>19</sub> H <sub>16</sub> F N <sub>2</sub> O <sub>3</sub> | (M+H) <sup>+</sup> |

## Compound 3ra

## User Spectra

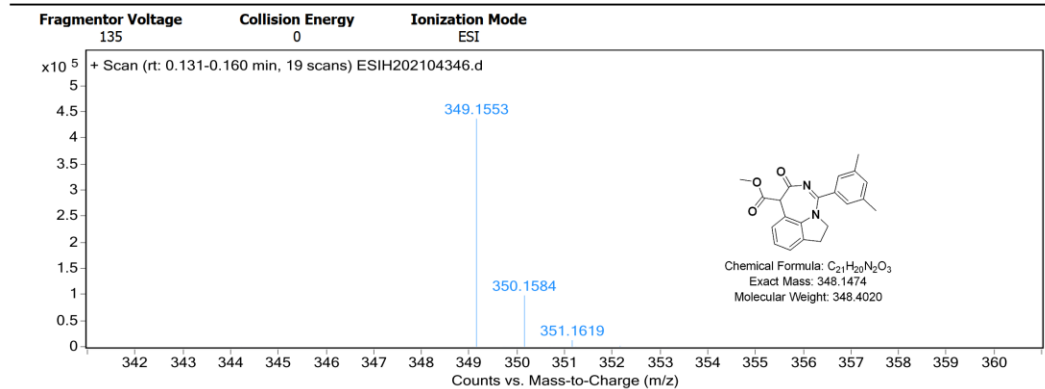

## Formula Calculator Results

| m/z      | Calc m/z | Diff (mDa) | Diff (ppm) | Ion Formula                                                   | Ion                |
|----------|----------|------------|------------|---------------------------------------------------------------|--------------------|
| 349.1553 | 349.1547 | -0.6       | -1.72      | C <sub>21</sub> H <sub>21</sub> N <sub>2</sub> O <sub>3</sub> | (M+H) <sup>+</sup> |

## Compound 3sa

## User Spectra

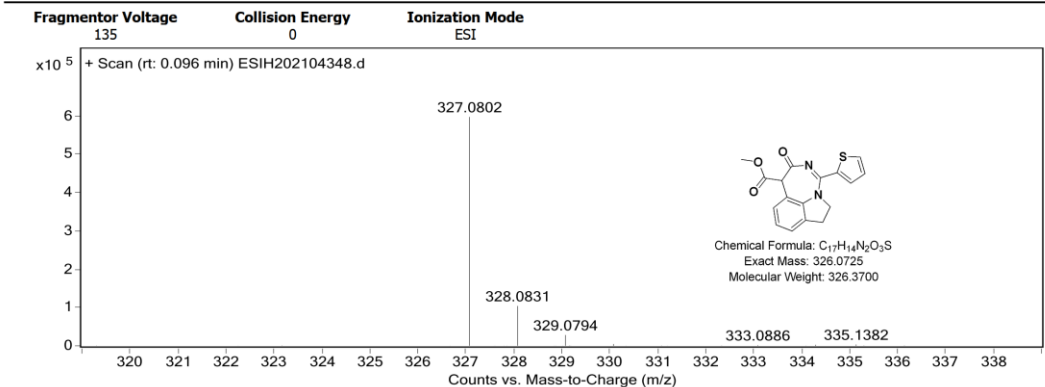

## Formula Calculator Results

| m/z      | Calc m/z | Diff (mDa) | Diff (ppm) | Ion Formula                                                     | Ion                |
|----------|----------|------------|------------|-----------------------------------------------------------------|--------------------|
| 327.0802 | 327.0798 | -0.46      | -1.4       | C <sub>17</sub> H <sub>15</sub> N <sub>2</sub> O <sub>3</sub> S | (M+H) <sup>+</sup> |

## Compound 3ta

User Spectra

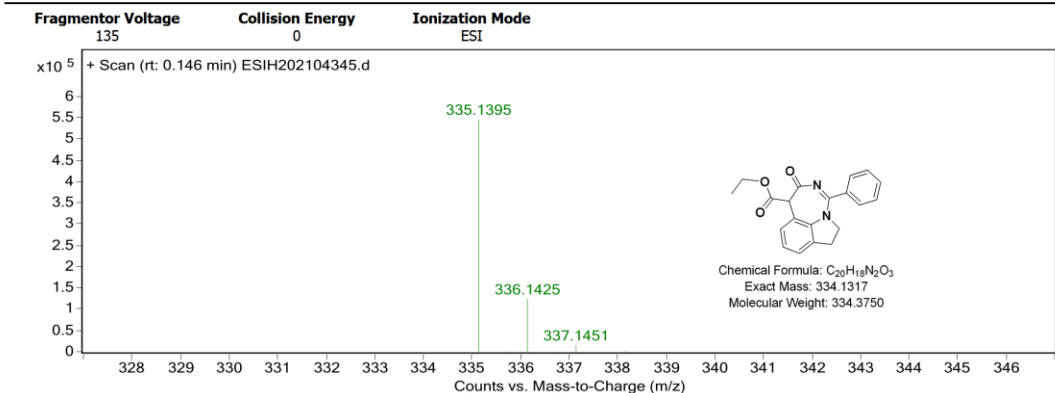

Formula Calculator Results

| m/z      | Calc m/z | Diff (mDa) | Diff (ppm) | Ion Formula                                                   | Ion                |
|----------|----------|------------|------------|---------------------------------------------------------------|--------------------|
| 335.1395 | 335.139  | -0.47      | -1.4       | C <sub>20</sub> H <sub>19</sub> N <sub>2</sub> O <sub>3</sub> | (M+H) <sup>+</sup> |

### Compound 3ab

Spectra

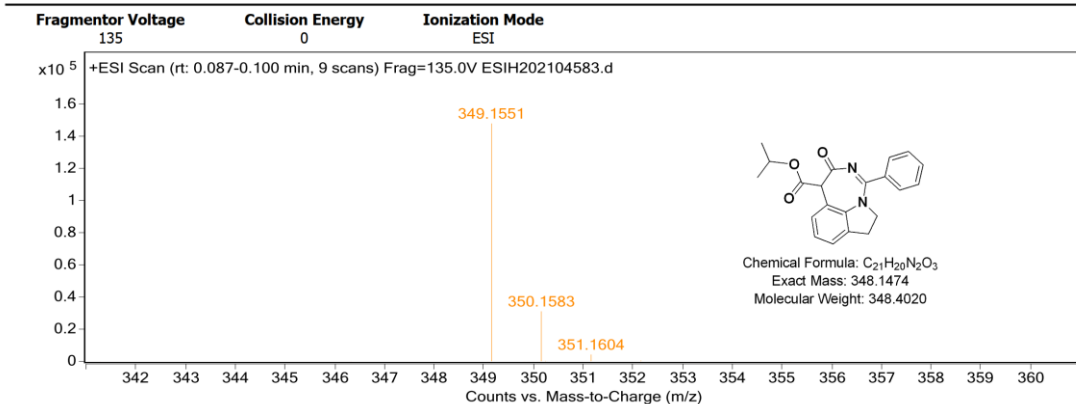

Formula Calculator Results

| m/z      | Calc m/z | Diff (mDa) | Diff (ppm) | Ion Formula                                                   | Ion                |
|----------|----------|------------|------------|---------------------------------------------------------------|--------------------|
| 349.1551 | 349.1547 | -0.42      | -1.21      | C <sub>21</sub> H <sub>21</sub> N <sub>2</sub> O <sub>3</sub> | (M+H) <sup>+</sup> |

### Compound 3ac

User Spectra

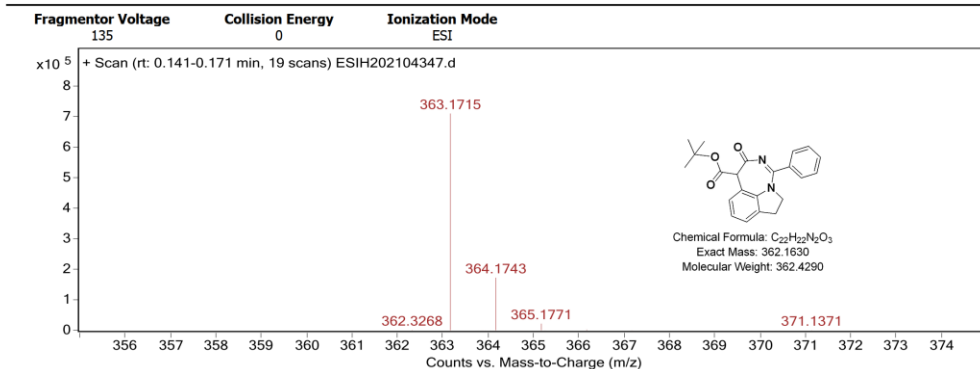

Formula Calculator Results

| m/z      | Calc m/z | Diff (mDa) | Diff (ppm) | Ion Formula                                                   | Ion                |
|----------|----------|------------|------------|---------------------------------------------------------------|--------------------|
| 363.1715 | 363.1703 | -1.17      | -3.21      | C <sub>22</sub> H <sub>23</sub> N <sub>2</sub> O <sub>3</sub> | (M+H) <sup>+</sup> |

### Compound 3ad

## Spectra

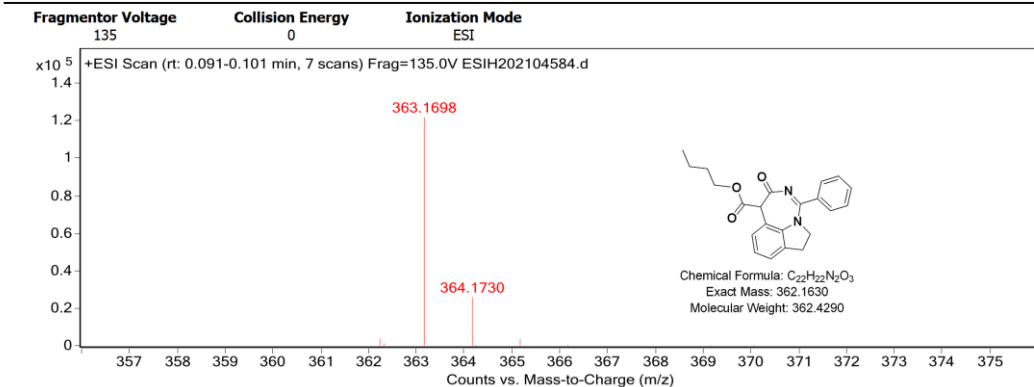

## Formula Calculator Results

| m/z      | Calc m/z | Diff (mDa) | Diff (ppm) | Ion Formula                                                   | Ion                |
|----------|----------|------------|------------|---------------------------------------------------------------|--------------------|
| 363.1698 | 363.1703 | 0.53       | 1.47       | C <sub>22</sub> H <sub>23</sub> N <sub>2</sub> O <sub>3</sub> | (M+H) <sup>+</sup> |

## Compound 3ae

## Spectra

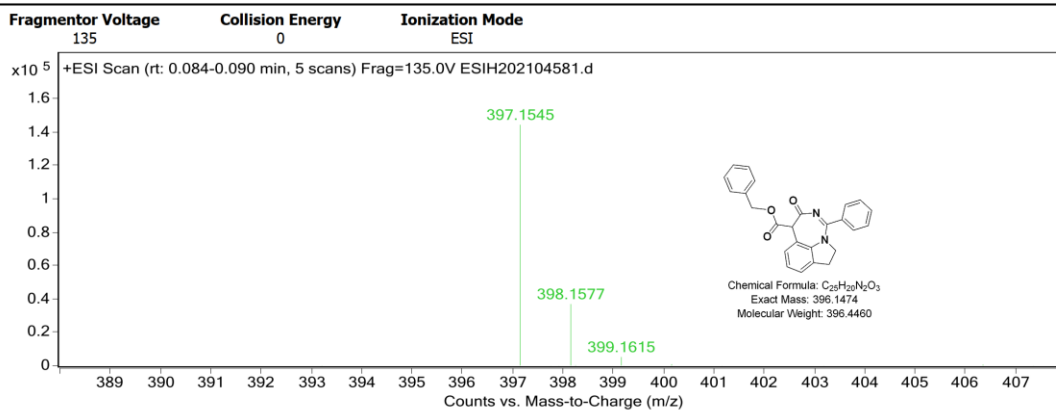

## Formula Calculator Results

| m/z      | Calc m/z | Diff (mDa) | Diff (ppm) | Ion Formula                                                   | Ion                |
|----------|----------|------------|------------|---------------------------------------------------------------|--------------------|
| 397.1545 | 397.1547 | 0.19       | 0.48       | C <sub>25</sub> H <sub>21</sub> N <sub>2</sub> O <sub>3</sub> | (M+H) <sup>+</sup> |

## Compound 3af

## User Spectra

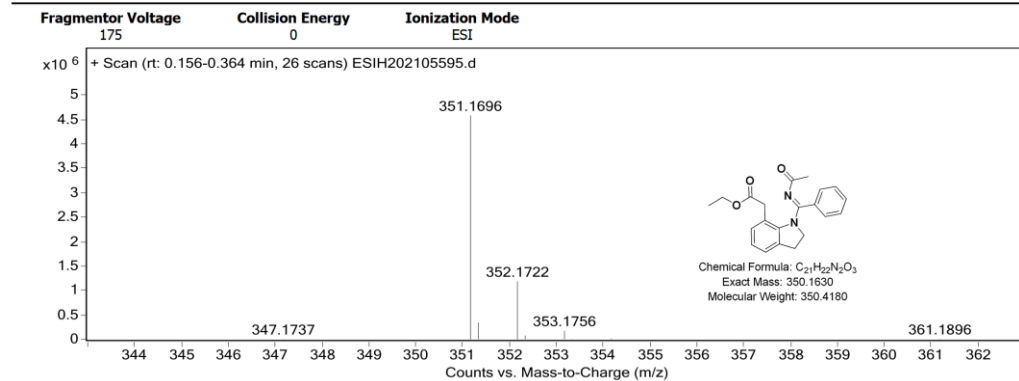

## Formula Calculator Results

| m/z      | Calc m/z | Diff (mDa) | Diff (ppm) | Ion Formula                                                   | Ion                |
|----------|----------|------------|------------|---------------------------------------------------------------|--------------------|
| 351.1696 | 351.1703 | 0.72       | 2.05       | C <sub>21</sub> H <sub>23</sub> N <sub>2</sub> O <sub>3</sub> | (M+H) <sup>+</sup> |

## Compound 5aa

## User Spectra

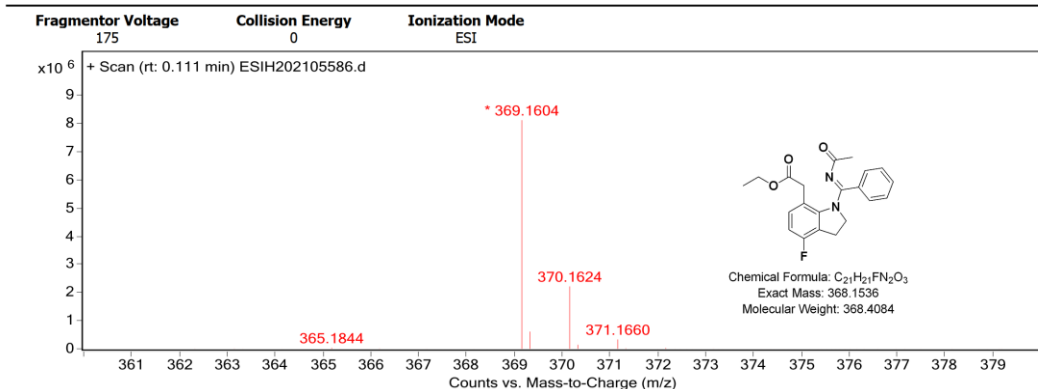

## Formula Calculator Results

| m/z      | Calc m/z | Diff (mDa) | Diff (ppm) | Ion Formula                                                     | Ion                |
|----------|----------|------------|------------|-----------------------------------------------------------------|--------------------|
| 369.1604 | 369.1609 | 0.47       | 1.27       | C <sub>21</sub> H <sub>22</sub> F N <sub>2</sub> O <sub>3</sub> | (M+H) <sup>+</sup> |

## Compound 5ba

## User Spectra

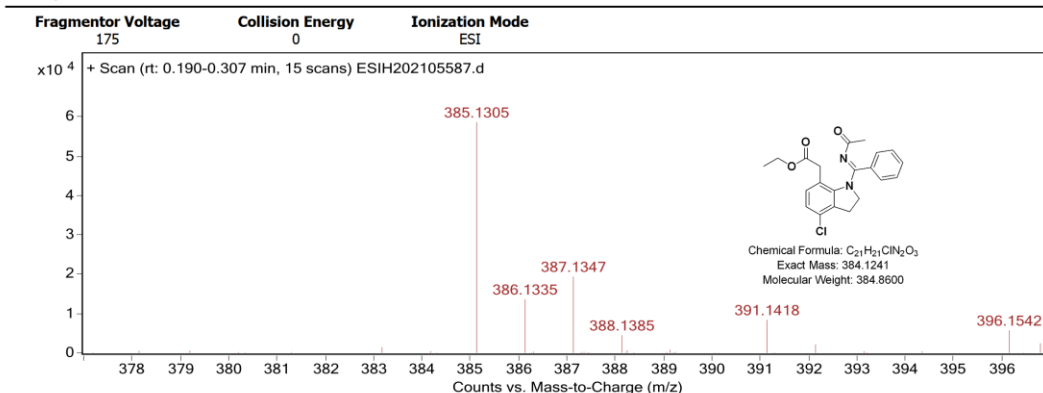

## Formula Calculator Results

| m/z      | Calc m/z | Diff (mDa) | Diff (ppm) | Ion Formula                                                      | Ion                |
|----------|----------|------------|------------|------------------------------------------------------------------|--------------------|
| 385.1305 | 385.1313 | 0.82       | 2.14       | C <sub>21</sub> H <sub>22</sub> Cl N <sub>2</sub> O <sub>3</sub> | (M+H) <sup>+</sup> |

## Compound 5ca

## User Spectra

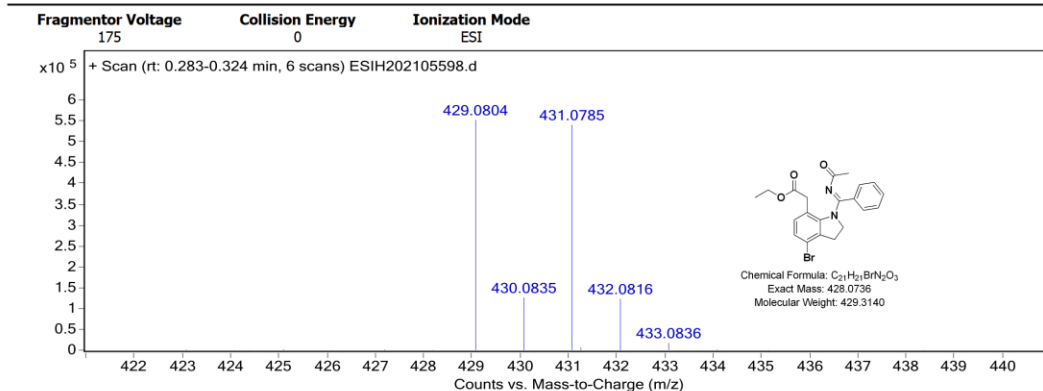

## Formula Calculator Results

| m/z      | Calc m/z | Diff (mDa) | Diff (ppm) | Ion Formula                                                      | Ion                |
|----------|----------|------------|------------|------------------------------------------------------------------|--------------------|
| 429.0804 | 429.0808 | 0.44       | 1.01       | C <sub>21</sub> H <sub>22</sub> Br N <sub>2</sub> O <sub>3</sub> | (M+H) <sup>+</sup> |

## Compound 5da

## User Spectra

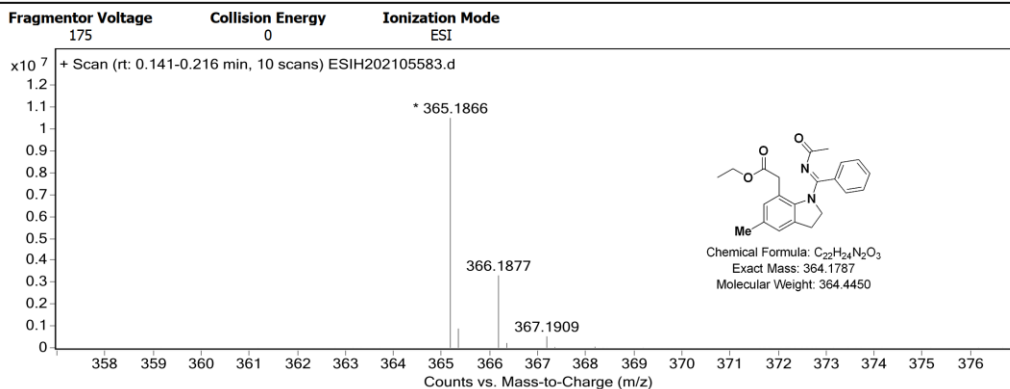

## Formula Calculator Results

| m/z      | Calc m/z | Diff (mDa) | Diff (ppm) | Ion Formula                                                   | Ion                |
|----------|----------|------------|------------|---------------------------------------------------------------|--------------------|
| 365.1866 | 365.186  | -0.64      | -1.74      | C <sub>22</sub> H <sub>25</sub> N <sub>2</sub> O <sub>3</sub> | (M+H) <sup>+</sup> |

## Compound 5fa

## User Spectra

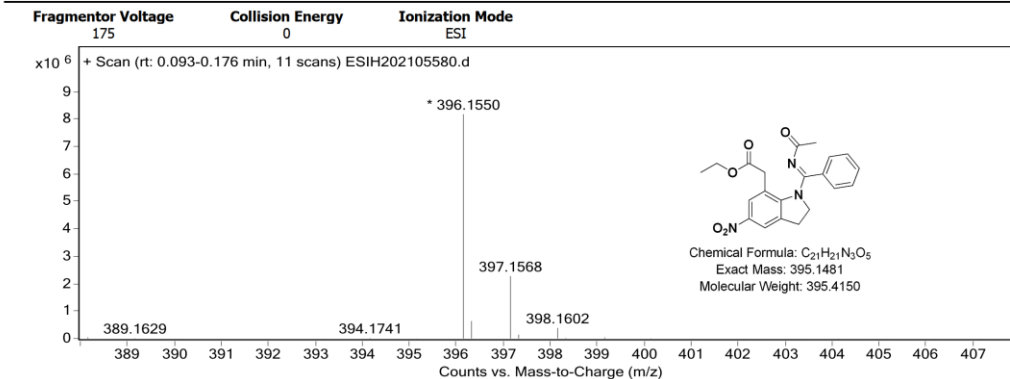

## Formula Calculator Results

| m/z     | Calc m/z | Diff (mDa) | Diff (ppm) | Ion Formula                                                   | Ion                |
|---------|----------|------------|------------|---------------------------------------------------------------|--------------------|
| 396.155 | 396.1554 | 0.42       | 1.07       | C <sub>21</sub> H <sub>22</sub> N <sub>3</sub> O <sub>5</sub> | (M+H) <sup>+</sup> |

## Compound 5ga

## User Spectra

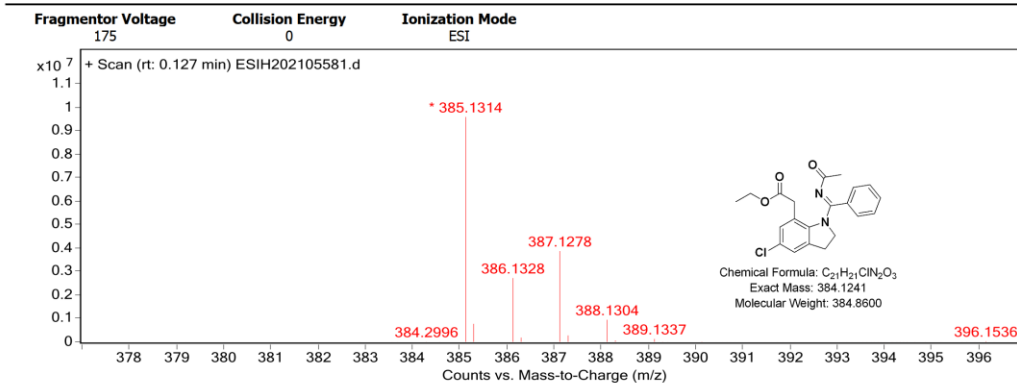

## Formula Calculator Results

| m/z      | Calc m/z | Diff (mDa) | Diff (ppm) | Ion Formula                                                      | Ion                |
|----------|----------|------------|------------|------------------------------------------------------------------|--------------------|
| 385.1314 | 385.1313 | -0.09      | -0.24      | C <sub>21</sub> H <sub>22</sub> Cl N <sub>2</sub> O <sub>3</sub> | (M+H) <sup>+</sup> |

## Compound 5ia

## User Spectra

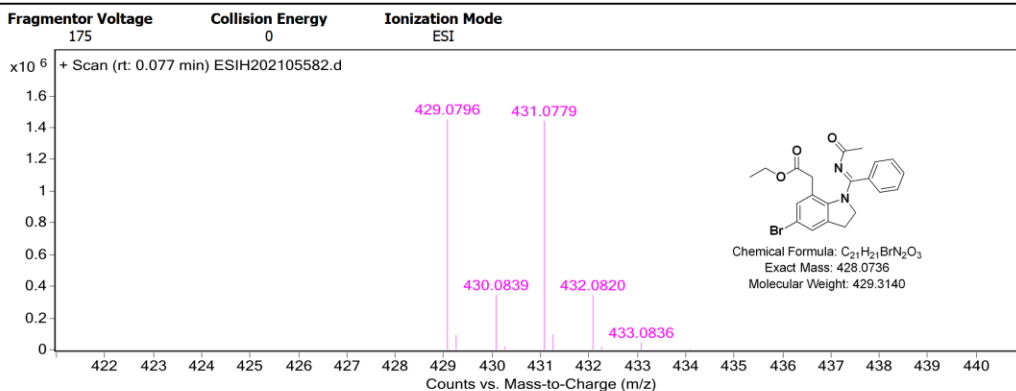

## Formula Calculator Results

| m/z      | Calc m/z | Diff (mDa) | Diff (ppm) | Ion Formula                                                     | Ion                |
|----------|----------|------------|------------|-----------------------------------------------------------------|--------------------|
| 429.0796 | 429.0808 | 1.22       | 2.85       | C <sub>21</sub> H <sub>22</sub> BrN <sub>2</sub> O <sub>3</sub> | (M+H) <sup>+</sup> |

## Compound 5ja

## User Spectra

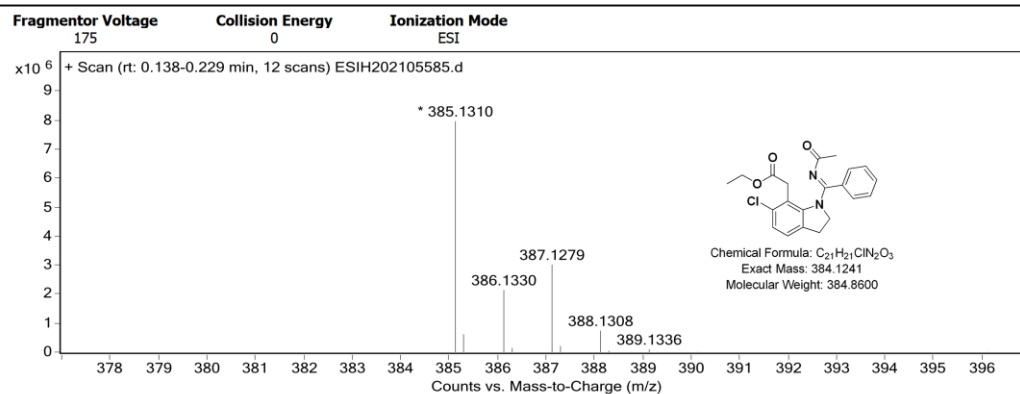

## Formula Calculator Results

| m/z     | Calc m/z | Diff (mDa) | Diff (ppm) | Ion Formula                                                     | Ion                |
|---------|----------|------------|------------|-----------------------------------------------------------------|--------------------|
| 385.131 | 385.1313 | 0.37       | 0.95       | C <sub>21</sub> H <sub>22</sub> ClN <sub>2</sub> O <sub>3</sub> | (M+H) <sup>+</sup> |

## Compound 5ka

## User Spectra

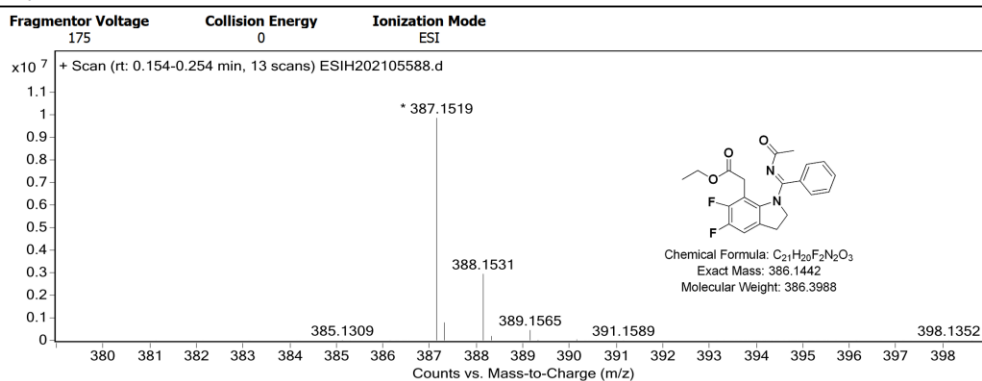

## Formula Calculator Results

| m/z      | Calc m/z | Diff (mDa) | Diff (ppm) | Ion Formula                                                                  | Ion                |
|----------|----------|------------|------------|------------------------------------------------------------------------------|--------------------|
| 387.1519 | 387.1515 | -0.39      | -1         | C <sub>21</sub> H <sub>21</sub> F <sub>2</sub> N <sub>2</sub> O <sub>3</sub> | (M+H) <sup>+</sup> |

## Compound 5na

User Spectra

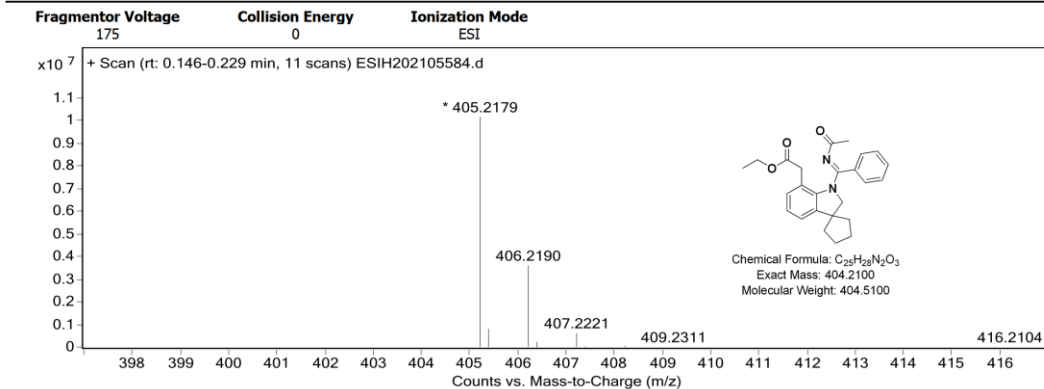

Formula Calculator Results

| m/z      | Calc m/z | Diff (mDa) | Diff (ppm) | Ion Formula                                                   | Ion                |
|----------|----------|------------|------------|---------------------------------------------------------------|--------------------|
| 405.2179 | 405.2173 | -0.62      | -1.54      | C <sub>25</sub> H <sub>29</sub> N <sub>2</sub> O <sub>3</sub> | (M+H) <sup>+</sup> |

### Compound 5pa

User Spectra

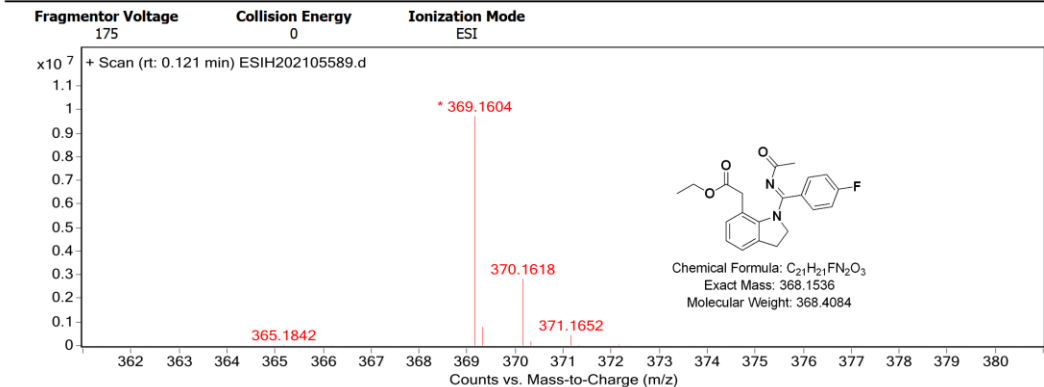

Formula Calculator Results

| m/z      | Calc m/z | Diff (mDa) | Diff (ppm) | Ion Formula                                                     | Ion                |
|----------|----------|------------|------------|-----------------------------------------------------------------|--------------------|
| 369.1604 | 369.1609 | 0.46       | 1.26       | C <sub>21</sub> H <sub>22</sub> F N <sub>2</sub> O <sub>3</sub> | (M+H) <sup>+</sup> |

### Compound 5a

User Spectra

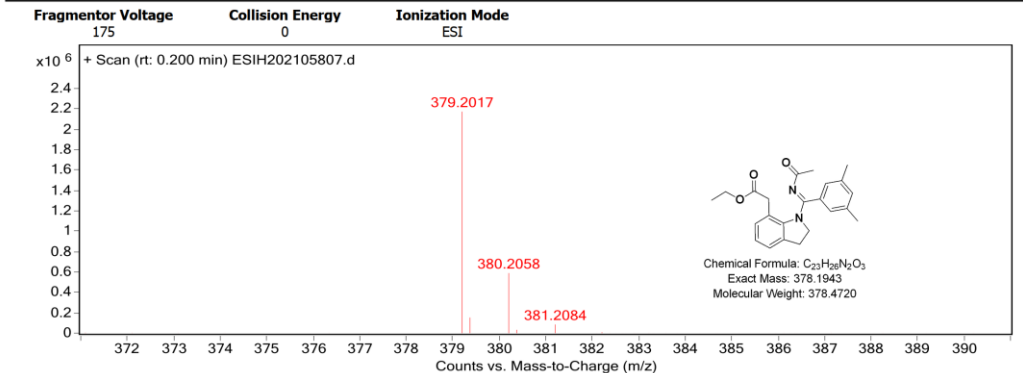

Formula Calculator Results

| m/z      | Calc m/z | Diff (mDa) | Diff (ppm) | Ion Formula                                                   | Ion                |
|----------|----------|------------|------------|---------------------------------------------------------------|--------------------|
| 379.2017 | 379.2016 | -0.09      | -0.25      | C <sub>23</sub> H <sub>27</sub> N <sub>2</sub> O <sub>3</sub> | (M+H) <sup>+</sup> |

### Compound 5sa



User Spectra

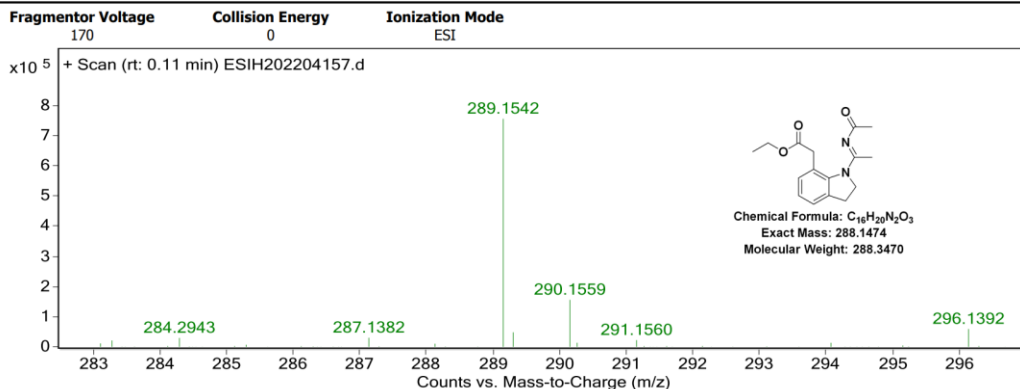

Formula Calculator Results

| m/z      | Calc m/z | Diff (mDa) | Diff (ppm) | Ion Formula                                                   | Ion                |
|----------|----------|------------|------------|---------------------------------------------------------------|--------------------|
| 289.1542 | 289.1547 | 0.47       | 1.63       | C <sub>16</sub> H <sub>21</sub> N <sub>2</sub> O <sub>3</sub> | (M+H) <sup>+</sup> |

### Compound 5ua

User Spectra

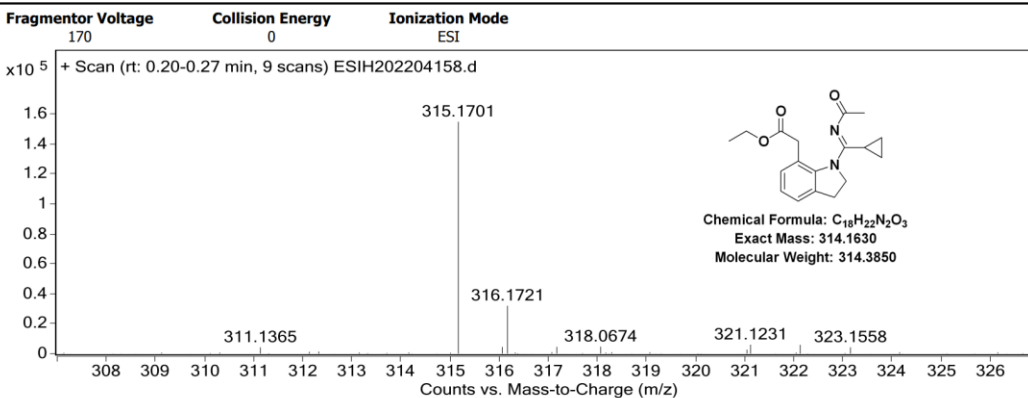

Formula Calculator Results

| m/z      | Calc m/z | Diff (mDa) | Diff (ppm) | Ion Formula                                                   | Ion                |
|----------|----------|------------|------------|---------------------------------------------------------------|--------------------|
| 315.1701 | 315.1703 | 0.23       | 0.72       | C <sub>18</sub> H <sub>23</sub> N <sub>2</sub> O <sub>3</sub> | (M+H) <sup>+</sup> |

### Compound 5va

User Spectra

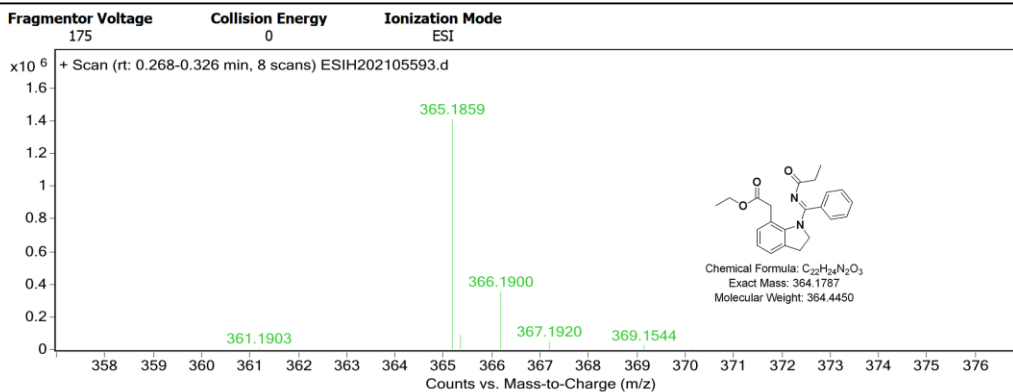

Formula Calculator Results

| m/z      | Calc m/z | Diff (mDa) | Diff (ppm) | Ion Formula                                                   | Ion                |
|----------|----------|------------|------------|---------------------------------------------------------------|--------------------|
| 365.1859 | 365.186  | 0.1        | 0.28       | C <sub>22</sub> H <sub>25</sub> N <sub>2</sub> O <sub>3</sub> | (M+H) <sup>+</sup> |

### Compound 5ab

## User Spectra

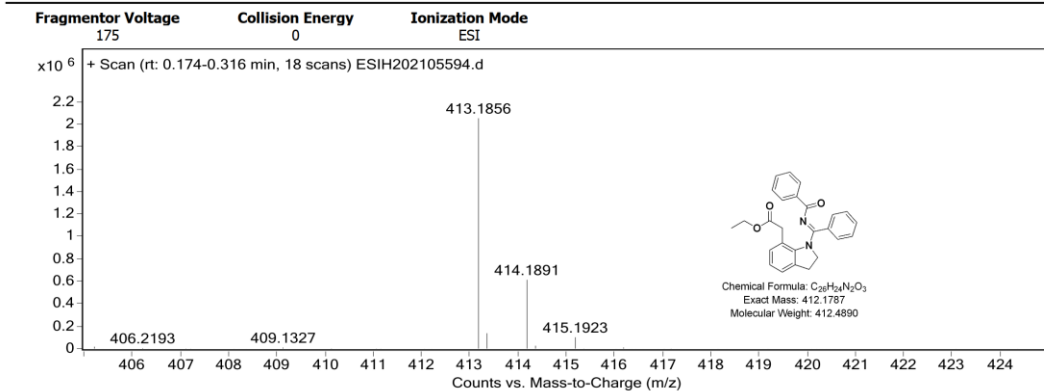

## Formula Calculator Results

| m/z      | Calc m/z | Diff (mDa) | Diff (ppm) | Ion Formula                                                   | Ion                |
|----------|----------|------------|------------|---------------------------------------------------------------|--------------------|
| 413.1856 | 413.186  | 0.37       | 0.88       | C <sub>26</sub> H <sub>25</sub> N <sub>2</sub> O <sub>3</sub> | (M+H) <sup>+</sup> |

## Compound 5ac

## User Spectra

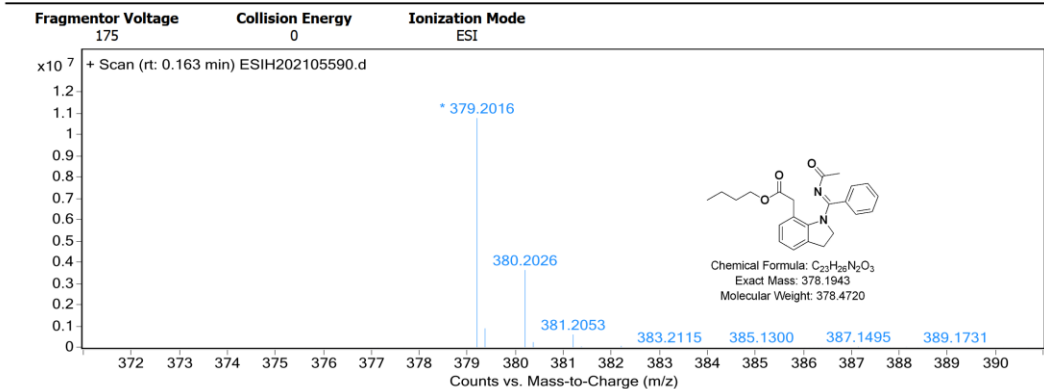

## Formula Calculator Results

| m/z      | Calc m/z | Diff (mDa) | Diff (ppm) | Ion Formula                                                   | Ion                |
|----------|----------|------------|------------|---------------------------------------------------------------|--------------------|
| 379.2016 | 379.2016 | -0.01      | -0.02      | C <sub>23</sub> H <sub>27</sub> N <sub>2</sub> O <sub>3</sub> | (M+H) <sup>+</sup> |

## Compound 5ad

## User Spectra

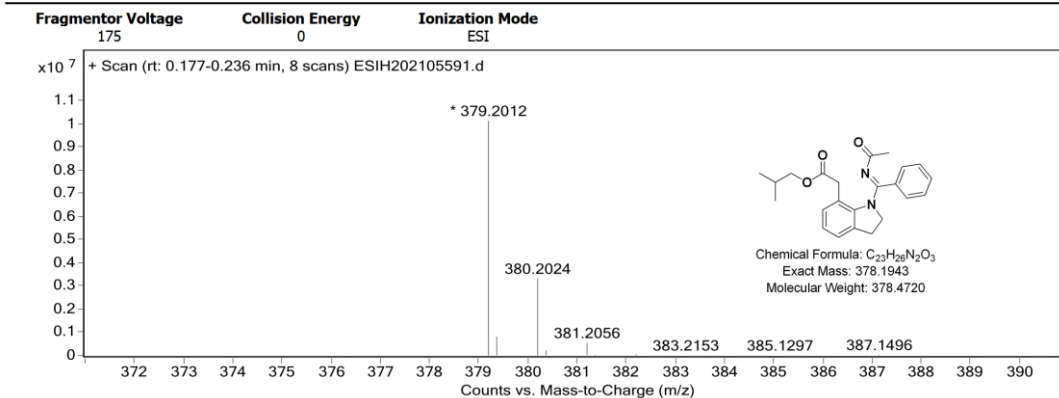

## Formula Calculator Results

| m/z      | Calc m/z | Diff (mDa) | Diff (ppm) | Ion Formula                                                   | Ion                |
|----------|----------|------------|------------|---------------------------------------------------------------|--------------------|
| 379.2012 | 379.2016 | 0.39       | 1.04       | C <sub>23</sub> H <sub>27</sub> N <sub>2</sub> O <sub>3</sub> | (M+H) <sup>+</sup> |

## Compound 5ae

User Spectra

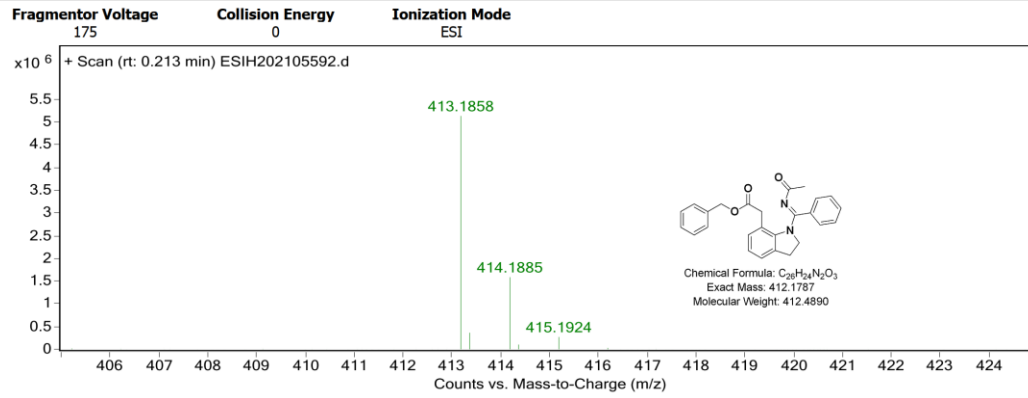

Formula Calculator Results

| m/z      | Calc m/z | Diff (mDa) | Diff (ppm) | Ion Formula   | Ion    |
|----------|----------|------------|------------|---------------|--------|
| 413.1858 | 413.186  | 0.21       | 0.52       | C28 H25 N2 O3 | (M+H)+ |

## Compound 5af

User Spectra

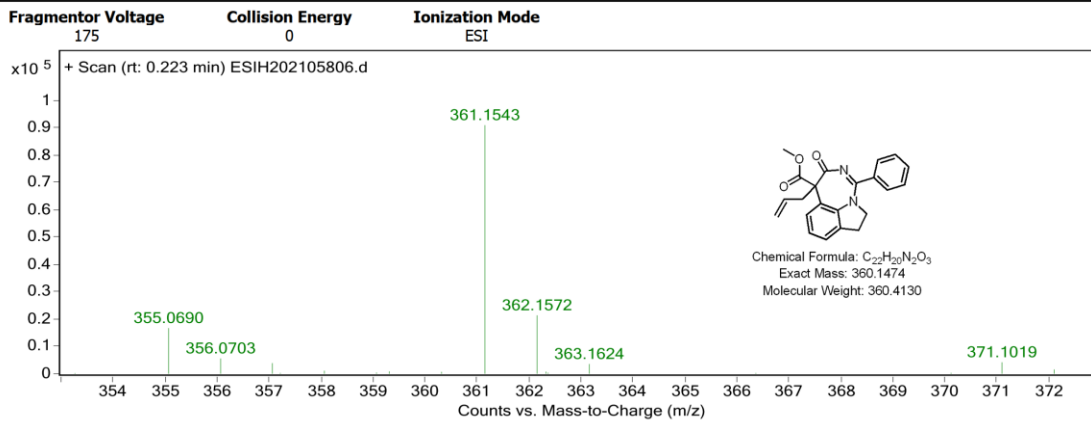

Formula Calculator Results

| m/z      | Calc m/z | Diff (mDa) | Diff (ppm) | Ion Formula   | Ion    |
|----------|----------|------------|------------|---------------|--------|
| 361.1543 | 361.1547 | 0.37       | 1.03       | C22 H21 N2 O3 | (M+H)+ |

## Compound 6

User Spectra

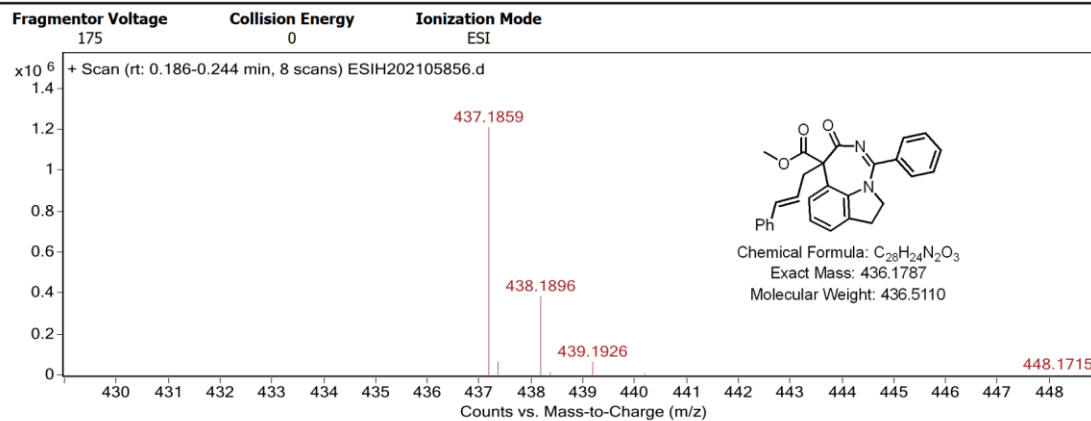

Formula Calculator Results

| m/z      | Calc m/z | Diff (mDa) | Diff (ppm) | Ion Formula                                                   | Ion                |
|----------|----------|------------|------------|---------------------------------------------------------------|--------------------|
| 437.1859 | 437.186  | 0.1        | 0.24       | C <sub>28</sub> H <sub>25</sub> N <sub>2</sub> O <sub>3</sub> | (M+H) <sup>+</sup> |

Compound 7
